# Supplementary material
Source: Research Square preprint supplement (doi:10.21203/rs.3.rs-9959043/v1)
Supplement: Supplementary file 1 [file b63470c447903913f696d55f.pdf]

## **Ground-state Baird aromaticity in a stable reduced carbon macrocycle**

Seyed M. B. H. Ghazvini,<sup>at</sup> Yikun Zhu,<sup>b†</sup> Ingrid Dell,<sup>at</sup> Zheng Wei,<sup>b</sup> Muhammad Yasir Mehboob,<sup>c</sup> Minu Sheeja,<sup>c</sup> Bartosz Szymański,<sup>d</sup> Cina Foroutan-Nejad<sup>c\*</sup>, Marina A. Petrukhina,<sup>b\*</sup> Marcus Korb<sup>a\*</sup>

<sup>a</sup>School of Molecular Sciences, The University of Western Australia, 35 Stirling Highway, Crawley, Western Australia 6009, Australia

<sup>b</sup>Department of Chemistry, University at Albany, State University of New York, 1400 Washington Avenue, Albany, NY 12222, USA E-mail: mpetrukhina@albany.edu

<sup>c</sup>Institute of Organic Chemistry, Polish Academy of Sciences, Warsaw, Poland

<sup>d</sup>University of Warsaw, Centre of New Technologies, Banacha 2c, 02-097 Warsaw, Poland

<sup>†</sup>These authors contributed equally to this work.

# Supporting Information

## Contents

|                                                                     |    |
|---------------------------------------------------------------------|----|
| Additional Details .....                                            | 2  |
| Experimental .....                                                  | 5  |
| Chemical Reduction of 3a.....                                       | 10 |
| Quantum Chemical Computations.....                                  | 15 |
| NMR spectra of new compounds.....                                   | 17 |
| Cartesian Coordinates of all the studied molecules (3a-3d, 3m)..... | 28 |

## Additional Details

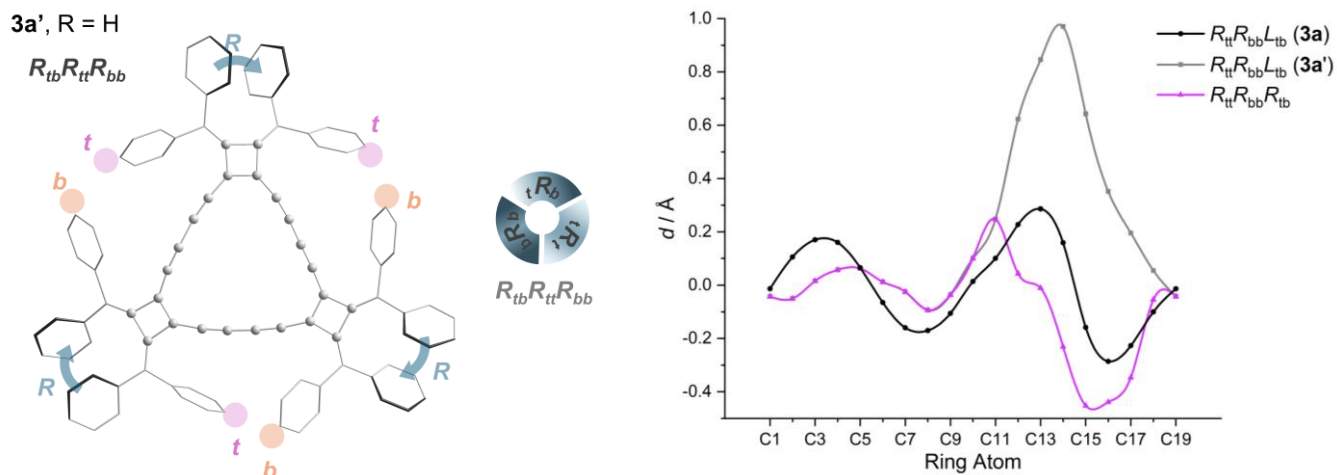

**Fig. S1.** Left: X-Ray structure (Ball-and-Stick/wireframe mole) of **3a'** showing the  $R_{tb}R_{tt}R_{bb}$ -set of sites (50:50 occupation). H-atoms are omitted for clarity. Right: Out-of-plane shift of individual atoms of the  $C_{18}$  motif. For  $R_{tt}R_{bb}L_{tb}$ -**3a'** and  $R_{tt}R_{bb}R_{tb}$ -**3a'** only the non-disordered parts ( $C_{10}$ ) were used to calculate the mean plane. The Sum of the differences  $\Sigma(\text{abs}(d(\mathbf{3a}')-\mathbf{3a}))$  for various labeling possibilities only includes this  $C_{10}$  motif to highlight the variations along the perimeter.

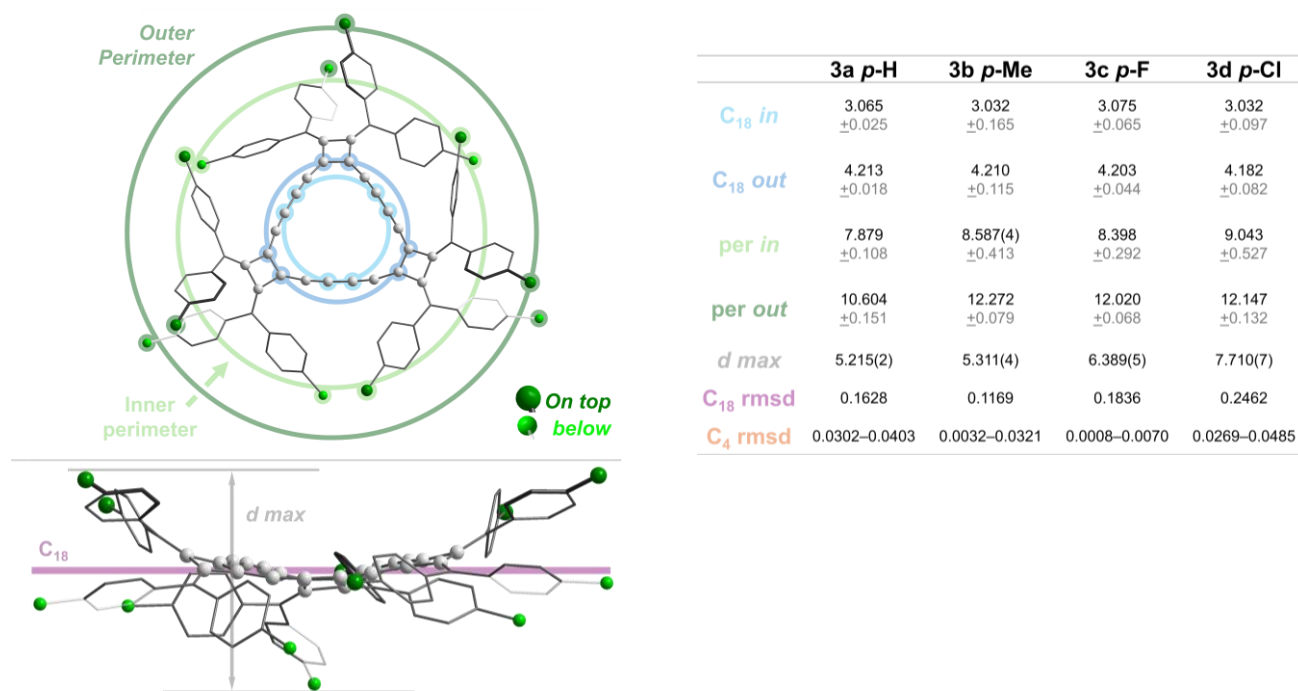

**Fig. S2.** Selected geometric features of the  $C_{18}$  macrocycles **3a-d**.

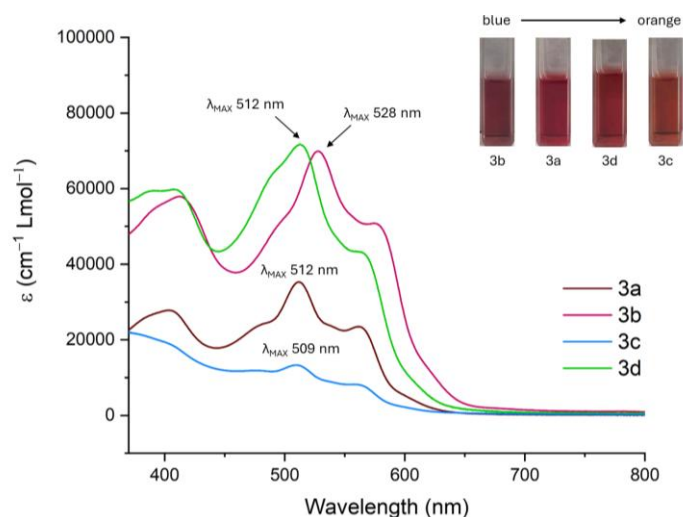

**Fig. S3.** UV-Vis Spectra of **3a–d** in  $\text{CHCl}_3$ .

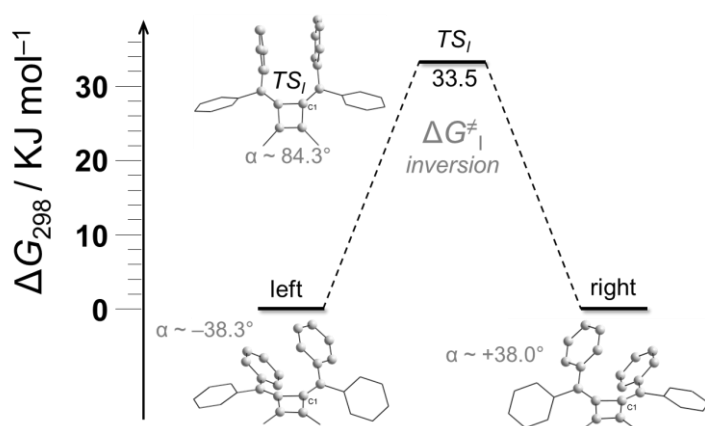

**Fig. S4.** Calculation of the inversion barrier of the butafulvene backbone between *L* (left) and *R* (right) isomers.

### Aromaticity and electronic structure of the $20\pi$ electron systems

Two exchange–correlation functionals, M06-2X<sup>1</sup> and CAM-B3LYP<sup>2</sup>, which have been shown to reliably describe electronic structure, were used to optimize the geometries of compounds **3a–d** and a simplified model system, **3m**, in which the terminal phenyl rings were replaced by hydrogen atoms. This simplification serves two purposes. First, removal of the twelve phenyl rings significantly improves computational efficiency and accuracy. Second, elimination of their steric effects allows the preferred geometric and electronic structure of the bare scaffold to be revealed.

The stability of all wavefunctions was examined to ensure that the DFT results are free from instabilities. Geometry optimizations were carried out using the def2-SVP and def2-TZVPP<sup>3</sup> basis sets (only for **3m**) in combination with both functionals. The nature of each stationary point was confirmed by analyzing the eigenvalues of the Hessian matrix. All DFT and ab initio calculations were performed using the Gaussian suite of programs.<sup>4</sup> The ground-state

<sup>1</sup> Zhao, Y. & Truhlar, D. G. The M06 suite of density functionals for main group thermochemistry, thermochemical kinetics, noncovalent interactions, excited states, and transition elements: two new functionals and systematic testing of four M06-class functionals and 12 other functionals. *Theor. Chem. Acc.* **120**, 215–241 (2008). DOI: 10.1007/s00214-007-0310-x.

<sup>2</sup> Yanai, T., *et al.* A new hybrid exchange–correlation functional using the Coulomb-attenuating method (CAM-B3LYP). *Chem. Phys. Lett.* **393**, 51–57 (2004). DOI: 10.1016/j.cplett.2004.06.011.

<sup>3</sup> (a) Weigend, F. & Ahlrichs, R. Balanced basis sets of split valence, triple zeta valence and quadruple zeta valence quality for H to Rn: design and assessment of accuracy. *Phys. Chem. Chem. Phys.* **7**, 3297–3305 (2005). DOI: 10.1039/B508541A. (b) Weigend, F. Accurate Coulomb-fitting basis sets for H to Rn. *Phys. Chem. Chem. Phys.* **8**, 1057–1065 (2006). DOI: 10.1039/B515623H.

<sup>4</sup> M. J. Frisch, G. W. Trucks, H. B. Schlegel, G. E. Scuseria, M. A. Robb, J. R. Cheeseman, G. Scalmani, V. Barone, G. A. Petersson, H. Nakatsuji, X. Li, M. Caricato, A. V. Marenich, J. Bloino, B. G. Janesko, R. Gomperts, B. Mennucci, H. P. Hratchian, J. V. Ortiz, A. F. Izmaylov, J. L. Sonnenberg, D. Williams-Young, F. Ding, F. Lipparini, F. Egidi, J. Goings, B. Peng, A. Petrone, T. Henderson, D. Ranasinghe, V. G.

electronic structures of the neutral species and their dianions were investigated using DFT for all systems. DFT predicts relatively large singlet–triplet energy gaps for the neutral species, whereas a small negative singlet–triplet gap, favoring a triplet dianion, was obtained for **3a–d** and **3m**. Notably, the computed DFT energy gaps are consistent with the experimental observations. However, because DFT results may benefit from error cancellation, we re-examined the electronic structure of **3m** at the FIC-NEVPT2<sup>5</sup>/ma-def2-TZVPP<sup>6</sup> level of theory using ORCA suite of programs.<sup>7</sup> The S–T energy gap evaluated at the FIC-NEVPT2 level consistently identifies the triplet dianion  $T[3m]^{2-}$  as the ground state across multiple choices of active space.

The DFT wavefunctions, saved as formatted checkpoint files, were analyzed with MultiWFN software<sup>1</sup> to compute the multicenter index (MCI).<sup>2</sup> NMR shielding calculations were carried out using the gauge-including atomic orbital (GIAO) formalism, and the corresponding wavefunctions were saved in WFX format for the ring current analysis. These wavefunctions were subsequently analyzed with AIMAll<sup>3</sup> to evaluate magnetic aromaticity by computing the magnetically induced current density passing through interatomic (zero-flux) surfaces shared between neighboring atoms of the quantum theory of atoms in molecules (QTAIM).<sup>4</sup> The use of interatomic surfaces provides a unique and reproducible measure of current intensity free from user-dependent parameter selection. Notably, the current-density data are automatically generated and stored in atomic files by AIMAll. To ensure the quality of the QTAIM analysis, the integrated Laplacian of the electron density over each atomic basin was verified to be smaller than  $10^{-4}$  a.u., and the total electronic energy difference between the QTAIM and DFT calculations was kept below  $0.1 \text{ kcal mol}^{-1}$ .

---

Zakrzewski, J. Gao, N. Rega, G. Zheng, W. Liang, M. Hada, M. Ehara, K. Toyota, R. Fukuda, J. Hasegawa, M. Ishida, T. Nakajima, Y. Honda, O. Kitao, H. Nakai, T. Vreven, K. Throssell, J. A. Montgomery, Jr., J. E. Peralta, F. Ogliaro, M. J. Bearpark, J. J. Heyd, E. N. Brothers, K. N. Kudin, V. N. Staroverov, T. A. Keith, R. Kobayashi, J. Normand, K. Raghavachari, A. P. Rendell, J. C. Burant, S. S. Iyengar, J. Tomasi, M. Cossi, J. M. Millam, M. Klene, C. Adamo, R. Cammi, J. W. Ochterski, R. L. Martin, K. Morokuma, O. Farkas, J. B. Foresman, D. J. Fox 2016.

<sup>5</sup> (a) Angeli, C., *et al.* Introduction of  $n$ -electron valence states for multireference perturbation theory. *J. Chem. Phys.* **114**, 10252–10264 (2001). DOI: 10.1063/1.1361246. (b) Angeli, C., *et al.*  $n$ -Electron valence state perturbation theory: a spinless formulation and an efficient implementation of the strongly contracted and of the partially contracted variants. *J. Chem. Phys.* **117**, 9138–9153 (2002). DOI: 10.1063/1.1515317.

<sup>6</sup> Zheng, J., *et al.* Minimally augmented Karlsruhe basis sets. *Theor. Chem. Acc.* **128**, 295–305 (2011). DOI: 10.1007/s00214-010-0846-z.

<sup>7</sup> Neese, F. Software update: The ORCA program system—Version 5.0. *WIREs Comput. Mol. Sci.* **12**, e1606 (2022). DOI: 10.1002/wcms.1606.

## Experimental

**General.** Unless otherwise noted, reactions were carried out under an atmosphere of nitrogen (UWA) or argon (UALbany) using standard Schlenk techniques. For neutral organic precursors, no particular care was taken to exclude air upon work-up of reaction products. Reaction flasks were heated at reduced pressure with a heat gun and flushed with nitrogen. This procedure was repeated three times. If necessary, solvents were deoxygenated by standard procedures. For column chromatography silica with a particle size of 60  $\mu\text{m}$  was used.

**Reagents.** Tetrahydrofuran, dichloromethane, hexane and toluene were dried and purified with an Innovative Technologies Solvent Purification System and stored over molecular sieve (4 Å). The 1,2-dibromo cyclobutene precursors **1a–d** were synthesized according to a recently published procedure.<sup>[8]</sup> Further starting materials were purchased from commercial suppliers and used without further purification, except otherwise noted.

### Instruments.

**FT-IR** spectra were recorded on an Agilent Cary 630 FTIR spectrometer using ATR or transmission mode from solutions between CaF<sub>2</sub> plates.

**NMR** spectra were recorded on a Bruker Avance Neo 400 MHz (<sup>1</sup>H: 400.13 MHz, <sup>13</sup>C: 100.63 MHz, <sup>31</sup>P: 161.97 MHz, <sup>19</sup>F: 376.46 MHz), and Bruker Avance IIIHD 500 MHz (<sup>1</sup>H: 500.10 MHz, <sup>13</sup>C: 125.8 MHz, <sup>31</sup>P: 202.4 MHz, <sup>19</sup>F: 470.6 MHz) spectrometers at room temperature.

They are reported with chemical shifts in  $\delta$  (ppm) units downfield from tetramethylsilane with the solvent as the reference signal (chloroform-*d*<sub>1</sub>: <sup>1</sup>H at 7.26 ppm and <sup>13</sup>C{<sup>1</sup>H} at 77.16 ppm) or by the <sup>2</sup>H solvent lock signal<sup>[9]</sup> unless otherwise noted. For all NMR spectra, multiplets are reported according to their closest first order approximation. The description *o*-, *m*-, *p*- refers to the *ipso* carbon closest to the cyclobutene core.

**High-resolution Mass spectra** (HRMS) were recorded on a Thermo Fusion Orbitrap Exploris 120, using positive mode electrospray ionization (ESI(+)). Samples were prepared in MeCN and inserted by direct injection via the on-board injector.

**Electrochemistry.** Cyclic voltammetry was carried out by using a PalmSens Emstat<sup>3+</sup> potentiostat, with a glassy-carbon working, platinum counter and pseudo-reference electrodes, from solutions in oxygen-free anhydrous dichloromethane containing 0.1 M [NBu<sub>4</sub>][BAr<sup>F</sup><sub>4</sub>] as the electrolyte, scan rate = 100 mV·s<sup>-1</sup>. The presented results are reported against the ferrocene/ferrocenium redox couple as an internal standard as required by IUPAC.<sup>Error!</sup> <sup>Bookmark not defined.</sup> Referencing was achieved by addition of decamethylferrocene as an internal standard.<sup>10</sup> The latter has been measured together with ferrocene and its redox potential was set to -626 mV ( $\pm 1$  mV;  $E_{\text{step}} = 2$  mV) for [NBu<sub>4</sub>][BAr<sup>F</sup><sub>4</sub>] electrolyte solution. These values represent the average of 5 consecutive measurements, which were all found within the given precision. Data have been processed with the PStTrace 4.8 software and Microsoft Excel to set the formal reduction potentials of the FcH/FcH<sup>+</sup> couple to 0.0 V.<sup>11</sup>

**Spectro-electrochemical FT-IR** measurements were conducted in an OTTLE cell using CH<sub>2</sub>Cl<sub>2</sub> solutions containing 0.1 M [NBu<sub>4</sub>][BAr<sup>F</sup><sub>4</sub>] supporting electrolyte. Spectra were recorded on an Agilent Technologies Cary 660 FTIR. Electrolysis in the cell was performed using a PalmSens Emstat<sup>3+</sup> potentiostat at a scan rate of 0.0025 V s<sup>-1</sup>.

**Single crystal X-ray diffraction analysis.** Data for **3a–c**, **5** were collected with a Rigaku-Oxford Diffraction XtaLAB Synergy-S diffractometer using a micro-focus sealed Cu K $\alpha$  radiation ( $\lambda = 1.54184$  Å) X-ray source at 100 K. Data for **3d** were collected the MX2 beamline at the Australian Synchrotron.<sup>[12]</sup> Single crystals were transferred from the mother liquor into immersion oil, frozen in liquid nitrogen and measured under a stream of nitrogen at 100 K.

<sup>8</sup> M. Korb et al, dibromocyclobutene manuscript

<sup>9</sup> R. K. Harris, E. D. Becker, S. M. Cabral de Menezes, R. Goodfellow, P. Granger, *Pure Appl. Chem.* **2001**, *73*, 1795.

<sup>10</sup> a) I. Noviadri, K. N. Brown, D. S. Fleming, P. T. Gulyas, P. A. Lay, A. F. Masters, L. Phillips, *J. Phys. Chem. B* **1999**, *103*, 6713–6722;

b) A. Nafady, W. E. Geiger, *Organometallics* **2008**, *27*, 5624–5631.

<sup>11</sup> a) F. Barrière, N. Camire, W. E. Geiger, U. T. Mueller-Westerhoff, R. Sanders, *J. Am. Chem. Soc.* **2002**, *124*, 7262–7263.

<sup>12</sup> D. Aragão, J. Aishima, H. Cherukuvada, R. Clarken, M. Clift, N. P. Cowieson, D.J. Ericsson, C. L. Gee, S. Macedo, N. Mudie, S. Panjkar, J. R. Price, A. Riboldi-Tunnicliffe, R. Rostan, R. Williamson, T. Tudor Caradoc-Davies, MX2: a high-flux undulator microfocuss beamline serving both the chemical and macromolecular crystallography communities at the Australian Synchrotron, *J. Synchrotron Rad.* **2018**, *25*, 885.

The molecular structures were solved by direct methods using SHELXS-18/3<sup>[13]</sup> and refined by full-matrix least-squares procedures on  $F^2$  using SHELXL-18.<sup>[14,15]</sup> All non-hydrogen atoms were refined anisotropically and a riding model was employed in the treatment of the hydrogen atom positions, except otherwise noted. Graphics of the molecular structures have been created by using ORTEP.<sup>[16]</sup> Crystallographic data have been deposited at the Cambridge Crystallographic Data Centre. Copies of the data with CCDC numbers listed in Tables S1 and S2 (below), that can be obtained free of charge via <https://www.ccdc.cam.ac.uk/structures/>, or from the Cambridge Crystallographic Data Centre, 12 Union Road, Cambridge CB2 1EZ, U.KCB21EZ, UK (fax +441223336033; email [deposit@ccdc.cam.ac.uk](mailto:deposit@ccdc.cam.ac.uk)). (The usage of SQUEEZE procedures, which is implemented in the PLATON program package, is mentioned individually.<sup>17)</sup>

## Synthesis of Starting Materials

### GP1. General procedure for conversion of 1,2-dibromocyclobutene via Sonogashira C,C cross-coupling reactions.

The respective 1,2-dibromocyclobutene (1 equiv),  $[\text{PdCl}_2(\text{PPh}_3)_2]$  (2.5 mol%) and CuI (5 mol%) were weighed into a screwcap vial (21 mL size). To the solid materials, dry  $\text{NEt}_3$  (ca 5 mL) was added and the remainder of the vial was filled with toluene. The suspension was sonicated to remove dissolved air and nitrogen gas was bubbled through the suspension for ca 10 min, followed by additional sonication. In the final step trimethylsilyl acetylene (3 equiv) were added (Note: more toluene was added if the vial was not filled completely), the vial was closed, placed in an oil bath and stirred at 85 °C for 18h. Afterwards the content was poured into a separatory funnel and the mixture, washed with HCl-acidified water and extracted using  $\text{Et}_2\text{O}$  (3 x 50 mL). The combined organic extract were dried over  $\text{MgSO}_4$  followed by removal of all volatiles in vacuo. Purification was realized via column chromatography (silica 3.5 x 15 cm) using solvent mixtures outlined below.

### 1,2-Bis(trimethylsilylethynyl)-3,4-bis(diphenylmethylene)cyclobut-1-ene (2a)

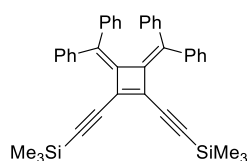

Compound **1a** (1.416 g, 2.62 mmol),  $[\text{PdCl}_2(\text{PPh}_3)_2]$  (84 mg, 0.12 mmol), CuI (100 mg, 0.53 mmol), and TMSA (1.20 mL, 8.45 mmol) were reacted according to GP1. A 95:5 hexane/ $\text{CH}_2\text{Cl}_2$  solvent mixture eluted the product as a yellow solid.

**Yield** of the crude: 770 mg (99%, quant).  **$^1\text{H NMR}$**  ( $\text{CDCl}_3$ ,  $\delta$ ): 0.03 (s, 18,  $\text{CH}_3$ ), 6.66–6.71 (m, 4H), 6.70 (tt,  $J_{\text{H,H}} = 7.5, 1.3$  Hz, 2H, *p*-Ph), 6.83–6.86 (m, 4H), 7.26–7.31 (m, 10H) ppm.  **$^{13}\text{C}\{^1\text{H}\}$  NMR** ( $\text{CDCl}_3$ ,  $\delta$ ): –0.3 ( $\text{CH}_3$ ), 96.1 ( $\text{C}\equiv\text{CSi}$ ), 112.3 ( $\text{C}\equiv\text{CSi}$ ), 127.1 (CH), 127.41 (*p*-Ph), 127.48 (CH), 127.8 (*p*-Ph), 130.8 (CH), 131.9 (CH), 133.7, 138.7, 140.0, 140.6, 141.4 ppm. ESI(+)-**HRMS** ( $m/z$ ): calcd. for  $\text{C}_{40}\text{H}_{38}\text{Si}_2 + \text{H}$  575.2585; found 575.2584 [ $\text{M} + \text{H}$ ]<sup>+</sup>.

### 1,2-Bis(trimethylsilylethynyl)-3,4-bis(bis(4-tolyl)methylene)cyclobut-1-ene (2b)

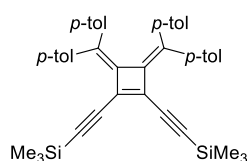

Compound **1b** (1.200 g, 2.012 mmol),  $[\text{PdCl}_2(\text{PPh}_3)_2]$  (84 mg, 0.12 mmol), CuI (100 mg, 0.53 mmol), and TMSA (1.00 mL, 7.041 mmol) were reacted according to GP1. A 9:1 hexane/ $\text{CH}_2\text{Cl}_2$  solvent mixture eluted the product as a yellow solid.

**Yield**: 914 mg (1.449 mmol, 72%).  $M = 631.02$  g/mol.  **$^1\text{H NMR}$**  ( $\text{CDCl}_3$ ,  $\delta$ ): 0.02 (s, 18H,  $\text{SiCH}_3$ ), 2.09 (s, 6H,  $\text{CH}_3$ ), 2.36 (s, 6H,  $\text{CH}_3$ ), 6.47 (d,  $^3J_{\text{H,H}} = 7.8$  Hz, *m*-4H), 6.70 (d,  $^3J_{\text{H,H}} = 8.1$  Hz, *o*-4H, CH), 7.08 (d,  $^3J_{\text{H,H}} = 7.7$  Hz, *m*-4H, CH), 7.16 (d,  $^3J_{\text{H,H}} = 8.1$  Hz, *o*-4H, CH) ppm.  **$^{13}\text{C}\{^1\text{H}\}$  NMR** ( $\text{CDCl}_3$ ,  $\delta$ ): –0.4 ( $\text{CH}_3$ ), 21.2 ( $\text{CH}_3$ ), 21.5 ( $\text{CH}_3$ ), 96.5 ( $\text{C}\equiv\text{CSi}$ ), 111.6 ( $\text{C}\equiv\text{CSi}$ ), 127.7 (*m*-C), 128.2 (*m*-C), 130.7 (*o*-C), 131.8 (*o*-C), 133.5 ( $\text{C}^{\text{Cybu}} = \text{C}^{\text{Vinyl}}$ ), 136.8 ( $^q\text{C}^{\text{Ar}}$ ), 137.2 ( $^q\text{C}^{\text{Ar}}$ ), 137.5 ( $^q\text{C}^{\text{Ar}}$ ), 137.8 ( $^q\text{C}^{\text{Ar}}$ ), 138.1 (C– $\text{C}\equiv\text{C}$ ), 140.8 ( $\text{C}^{\text{Cybu}} = \text{C}^{\text{Vinyl}}$ ) ppm. APCI(–)-**HRMS** ( $m/z$ ): calcd. for  $\text{C}_{44}\text{H}_{46}\text{Si}_2$  630.3144; found 630.3144 [ $\text{M}$ ]<sup>–</sup>.

<sup>13</sup> Sheldrick, G. M.; Phase annealing in SHELX-90: direct methods for larger structures; *Acta Crystallogr. Sect. A Found. Crystallogr.* **1990**, *46*, 467–473.

<sup>14</sup> Sheldrick, G. M.; Program for Crystal Structure Refinement; University of Gottingen, Gottingen, Germany, 1997.

<sup>15</sup> Sheldrick, G. M.; A short history of SHELX; *Acta Crystallogr. Sect. A Found. Crystallogr.* **2008**, *64*, 112–122; Sheldrick, G. M., *Acta Crystallogr. Sect. C Struct. Chem.* **2015**, *71*, 3–8.

<sup>16</sup> L. J. Farrugia, *J. Appl. Crystallogr.* **2012**, *45*, 849–854.

<sup>17</sup> A. L. Spek, *Acta Cryst. Sect. C* **2015**, *71*, 9–18.

### 1,2-Bis(trimethylsilylethynyl)-3,4-bis(bis(4-fluorophenyl)methylene)cyclobut-1-ene (2c)

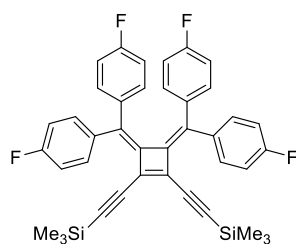

Compound **1c** (1.400 g, 2.287 mmol), [PdCl<sub>2</sub>(PPh<sub>3</sub>)<sub>2</sub>] (84 mg, 0.12 mmol), CuI (200 mg, 1.053 mmol), and TMSA (1.00 mL, 7.041 mmol) were reacted according to GP1. A 85:15 hexane/CH<sub>2</sub>Cl<sub>2</sub> solvent mixture eluted the product as a yellow solid.

**Yield:** 962 mg (1.487 mmol, 65%). M = 646.88 g/mol. <sup>1</sup>H NMR (CDCl<sub>3</sub>, δ): 0.06 (s, 18H, CH<sub>3</sub>), 6.46 (dd, <sup>3</sup>J<sub>H,H</sub> = <sup>3</sup>J<sub>H,F</sub> = 8.8 Hz, *m*-4H), 6.80 (dd, <sup>3</sup>J<sub>H,H</sub> = 8.8 Hz, <sup>4</sup>J<sub>H,F</sub> = 5.5 Hz, *o*-4H, CH), 6.98 (dd, <sup>3</sup>J<sub>H,H</sub> = <sup>3</sup>J<sub>H,F</sub> = 8.7 Hz, *m*-4H, CH), 7.22 (dd, <sup>3</sup>J<sub>H,H</sub> = 8.7 Hz, <sup>4</sup>J<sub>H,F</sub> = 5.5 Hz, *o*-4H, CH) ppm. <sup>13</sup>C{<sup>1</sup>H} NMR (CDCl<sub>3</sub>, δ): -0.4 (CH<sub>3</sub>), 95.8 (C≡CSi), 113.2 (C≡CSi), 114.3 (d, <sup>2</sup>J<sub>C,F</sub> = 21.6 Hz, *m*-C), 114.6 (d, <sup>2</sup>J<sub>C,F</sub> = 21.4 Hz, *m*-C), 131.3 (C<sup>Cybu</sup>=C<sup>Vinyl</sup>), 132.3 (d, <sup>3</sup>J<sub>C,F</sub> = 8.5 Hz, *o*-C), 133.3 (d, <sup>3</sup>J<sub>C,F</sub> = 8.2 Hz, *o*-C), 135.8 (d, <sup>4</sup>J<sub>C,F</sub> = 3.3 Hz, *i*-C), 136.1 (d, <sup>4</sup>J<sub>C,F</sub> = 3.3 Hz, *i*-C), 138.6 (C-C≡C), 141.0 (C<sup>Cybu</sup>=C<sup>Vinyl</sup>), 162.5 (d, <sup>1</sup>J<sub>C,F</sub> = 248.6 Hz, *p*-CF), 162.9 (d, <sup>1</sup>J<sub>C,F</sub> = 247.0 Hz, *p*-CF) ppm. <sup>19</sup>F{<sup>1</sup>H} NMR (CDCl<sub>3</sub>, δ): -114.43 (s), -114.24 (s) ppm. APCI(-)-HRMS (*m/z*): calcd. for C<sub>40</sub>H<sub>34</sub>F<sub>4</sub>Si<sub>2</sub> 646.2141; found 646.2139 [M]<sup>-</sup>.

### 1,2-Bis(trimethylsilylethynyl)-3,4-bis(bis(4-chlorophenyl)methylene)cyclobut-1-ene (2d)

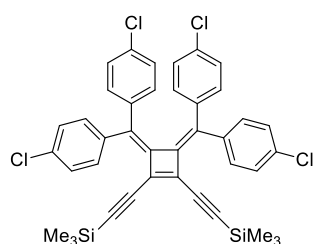

Compound **1d** (600 mg, 0.885 mmol), [PdCl<sub>2</sub>(PPh<sub>3</sub>)<sub>2</sub>] (31 mg, 0.04 mmol), CuI (100 mg, 0.05 mmol), and TMSA (1.00 mL, 7.041 mmol) were reacted according to GP1. A 85:15 hexane/CH<sub>2</sub>Cl<sub>2</sub> solvent mixture eluted the product as a pale yellow solid.

**Yield:** 422 mg (0.593 mmol, 67%). M = 712.68 g/mol. <sup>1</sup>H NMR (CDCl<sub>3</sub>, δ): 0.07 (s, 18H, CH<sub>3</sub>), 6.72 (d, <sup>3</sup>J<sub>H,H</sub> = 9.1 Hz, *m*-4H), 6.76 (d, <sup>3</sup>J<sub>H,H</sub> = 8.8 Hz, *o*-4H), 7.18 (d, <sup>3</sup>J<sub>H,H</sub> = 8.4 Hz, *m*-4H), 7.27 (d, <sup>3</sup>J<sub>H,H</sub> = 8.4 Hz, *o*-4H) ppm. <sup>13</sup>C{<sup>1</sup>H} NMR (CDCl<sub>3</sub>, δ): -0.5 (CH<sub>3</sub>), 95.6 (C≡CSi), 114.1 (C≡CSi), 127.6 (CH), 127.9 (CH), 131.2, 131.8 (CH), 133.0 (CH), 134.20, 134.26, 137.92, 138.02, 139.2, 141.3 ppm. APCI(-)-HRMS (*m/z*): calcd. for C<sub>40</sub>H<sub>34</sub><sup>35</sup>Cl<sub>3</sub><sup>37</sup>ClSi<sub>2</sub> 712.0929; found 712.0924 [M]<sup>-</sup>.

### 1,2-Bis(ferrocenylethynyl)-3,4-bis(bis-4-tolylmethylene)cyclobut-1-ene (5) – MK-U-387-F2

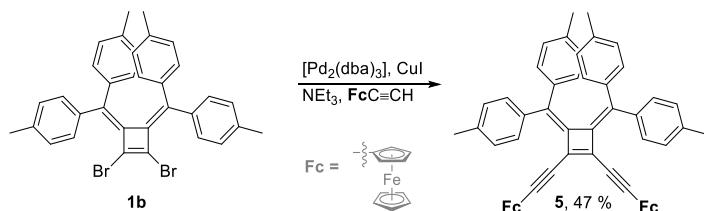

Compound **1b** (200 mg, 0.335 mmol), [Pd<sub>2</sub>(dba)<sub>3</sub>] (30 mg, 0.033 mmol), CuI (100 mg, 0.053 mmol), dppf (18 mg, 0.032 mmol), and ethynyl ferrocene (211 mg, 1.091 mmol) were reacted according to GP1. A 60:40 hexane/CH<sub>2</sub>Cl<sub>2</sub> solvent mixture eluted the product as an orange solid.

**Yield:** 136 mg (0.159 mmol, 47%). M = 854.70 g/mol. <sup>1</sup>H NMR (CDCl<sub>3</sub>, δ): 2.11 (s, 6H, Me<sup>out</sup>), 2.46 (s, 6H, Me<sup>in</sup>), 4.12 (s, 10H, C<sub>5</sub>H<sub>5</sub>), 4.20 (s br, 8H, C<sub>5</sub>H<sub>4</sub>), 6.50 (d, <sup>3</sup>J<sub>H,H</sub> = 7.6 Hz, 4H, *m*-C<sub>6</sub>H<sub>4</sub><sup>o</sup>), 6.76 (d, <sup>3</sup>J<sub>H,H</sub> = 8.1 Hz, 4H, *o*-C<sub>6</sub>H<sub>4</sub><sup>o</sup>), 7.17 (d, <sup>3</sup>J<sub>H,H</sub> = 7.8 Hz, 4H, *m*-C<sub>6</sub>H<sub>4</sub><sup>i</sup>), 7.27 (d, <sup>3</sup>J<sub>H,H</sub> = 8.1 Hz, 4H, *o*-C<sub>6</sub>H<sub>4</sub><sup>i</sup>) ppm. <sup>13</sup>C{<sup>1</sup>H} NMR (CDCl<sub>3</sub>, δ): 21.2 (Me<sup>o</sup>), 21.7 (Me<sup>i</sup>), 65.1 (<sup>q</sup>C<sub>5</sub>H<sub>4</sub>), 69.4 (C<sub>5</sub>H<sub>4</sub>), 70.3 (C<sub>5</sub>H<sub>5</sub>), 71.6 (C<sub>5</sub>H<sub>4</sub>), 80.0 (C≡C), 105.0 (C≡C), 127.7 (*m*-C<sub>6</sub>H<sub>4</sub><sup>o</sup>), 128.2 (*m*-C<sub>6</sub>H<sub>4</sub><sup>i</sup>), 130.7 (*o*-C<sub>6</sub>H<sub>4</sub><sup>o</sup>), 131.76 (<sup>q</sup>C<sub>6</sub>H<sub>4</sub>-C<sup>vinyl</sup>), 131.85 (*o*-C<sub>6</sub>H<sub>4</sub><sup>i</sup>), 136.5 (C-CH<sub>3</sub><sup>o</sup>), 136.8 (C-CH<sub>3</sub><sup>i</sup>), 137.9 (<sup>q</sup>C<sub>6</sub>H<sub>4</sub><sup>o</sup>), 138.3 (<sup>q</sup>C<sub>6</sub>H<sub>4</sub><sup>i</sup>), 139.0, 139.2 ppm. ESI(+)-HRMS (*m/z*): calcd. for C<sub>58</sub>H<sub>46</sub>Fe<sub>2</sub> 854.2293; found 854.2285 [M]<sup>+</sup>.

### GP2. General procedure for the formation of macrocycles 3 via oxidative coupling.

A two necked round bottom flask, equipped with a stirrer bar, was charged with 10 ml of methanol, 30 ml of toluene and 40 ml of pyridine. Compounds **2** (200 mg, 1 eq.) were added, resulting in a transparent yellow solution, followed by addition of KF (72 mg, 1.24 mmol, 4 eq.) and Cu(OAc)<sub>2</sub>·H<sub>2</sub>O in crystal form (926 mg, 4.638 mmol, 15 eq.). The mixture was stoppered, stirred, and heated to 50–60 °C for 72h. During that time, the colour of the solution changed from dark green to dark purple. The reaction mixture was evaporated to dryness using a cold trap. To remove polymers, the black crude product was dissolved in CH<sub>2</sub>Cl<sub>2</sub> and filtered through a 4 cm plug of silica using CH<sub>2</sub>Cl<sub>2</sub>

until the eluent remained colourless. The resulting dark purple/red crude product was adsorbed onto silica and chromatographed on a pre-packed silica column (3.5 cm × 30 cm) with a 9:1 hexanes/CH<sub>2</sub>Cl<sub>2</sub> solvent mixture, that was gradually changed to 4:6 hexanes/CH<sub>2</sub>Cl<sub>2</sub>. The major red fraction eluted as a mixture of trimeric and tetrameric cyclic products (~300 mg), which was re-adsorbed to silica and loaded onto another pre-packed silica column (3.5 cm × 40 cm), and subsequently eluted with a 8:2 hexanes/CH<sub>2</sub>Cl<sub>2</sub> solvent mixture that was changed gradually over the course of several hours to 3:1 hexanes/CH<sub>2</sub>Cl<sub>2</sub>

#### Macrocycle 3a (R = H)

Macrocycle **3a** was prepared from compound **2a** (727 mg, 1.69 mmol) according to GP2. A total of 185 fractions were eluted. The purity of the fractions was determined via HRMS (APCI (-)), as the tetramer and trimer produced identical <sup>1</sup>H NMR. The fractions containing pure trimer were combined to give **3a** as a deep red solid.

**Yield:** 134 mg (0.104 mmol, 6.2%). M = 1285.602 g/mol. M = 1313.66 g / mol. <sup>1</sup>H NMR (CDCl<sub>3</sub>, δ): 7.55 (dt, J = 8.8, 4.2 Hz, 6H), 7.48 (d, J = 4.4 Hz, 24H), 7.01 – 6.96 (m, 12H), 6.89 (ddt, J = 7.9, 6.9, 1.3 Hz, 6H), 6.83 – 6.77 (m, 12H) ppm. <sup>13</sup>C{<sup>1</sup>H} NMR (CDCl<sub>3</sub>, δ): 142.5, 140.4, 140.1, 136.8, 131.5, 131.5, 129.0, 128.0, 127.9, 127.4, 93.8, 85.4, 77.4, 77.2, 77.0 ppm. APCI(-)-HRMS (m/z): calcd. for [C<sub>101</sub><sup>13</sup>CH<sub>60</sub>]<sup>-</sup> 1285.4734; found 1285.4735 [M]<sup>-</sup>.

#### Macrocycle 3b (R = Me)

Macrocycle **3b** was prepared from compound **2b** (840 mg, 0.578 mmol) according to GP2. Work-up is similar to compound **3a**, whereas the fraction sizes differ slightly.

**Yield:** 87 mg (0.060 mmol, 10.4 %). M = 1453.93 g/mol. <sup>1</sup>H NMR (CDCl<sub>3</sub>, δ): 7.33 (d, J = 8.1 Hz, 12H), 7.15 (d, J = 7.9 Hz, 12H), 6.82 (d, J = 8.0 Hz, 12H), 6.57 (d, J = 7.9 Hz, 12H), 2.42 (s, 18H), 2.16 (s, 18H) ppm. <sup>13</sup>C{<sup>1</sup>H} NMR (CDCl<sub>3</sub>, δ): 140.81, 136.85, 136.15, 136.07, 136.00, 135.95, 133.57, 130.32, 129.80, 127.09, 126.61, 89.97, 80.95, 28.68, 20.34, 20.03 ppm. APCI(-)-HRMS (m/z): calcd. for [C<sub>113</sub><sup>13</sup>CH<sub>60</sub>]<sup>-</sup> 1453.66121; found 1453.6613 [M]<sup>-</sup>.

#### Macrocycle 3c (R = F)

Deep red solid. As a mixture of isomers (Major isomer noted as superscript a, minor isomer noted as superscript b). <sup>1</sup>H NMR (CDCl<sub>3</sub>, δ): 7.46 (d, J = 8.1 Hz, 4H<sup>a</sup>), 7.37 (d, J = 8.2 Hz, 4H<sup>a</sup>), 7.29 (d, J = 8.3 Hz, 4H<sup>b</sup>), 7.14 (d, J = 8.1 Hz, 4H<sup>b</sup>), 6.86 (s, 8H<sup>a</sup>), 6.77 (q, J = 8.4 Hz, 8H<sup>b</sup>) ppm. <sup>13</sup>C{<sup>1</sup>H} NMR (CDCl<sub>3</sub>, δ): 142.29, 142.16, 139.00, 137.95, 137.80, 137.47, 137.40, 135.18, 134.94, 134.88, 134.77, 134.47, 133.20, 132.73, 132.63, 132.48, 131.97, 128.59, 128.12, 127.93, 127.79, 93.83 (≡C<sup>a</sup>), 91.39 (≡C<sup>b</sup>), 85.61 (≡C<sup>a</sup>), 81.95 (≡C<sup>b</sup>) ppm. APCI(-)-HRMS (m/z): calcd. for [C<sub>101</sub><sup>13</sup>CH<sub>48</sub><sup>35</sup>Cl<sub>9</sub><sup>37</sup>Cl<sub>3</sub>-H]<sup>-</sup> 1697.9891; found 1697.9960 [M-H]<sup>-</sup>.

#### Macrocycle 3d (R = Cl)

<sup>1</sup>H NMR (CDCl<sub>3</sub>, δ): 7.44 – 7.38 (m, 12H), 7.20 – 7.13 (m, 12H), 6.97 – 6.90 (m, 12H), 6.60 – 6.53 (m, 12H) ppm. <sup>13</sup>C{<sup>1</sup>H} NMR (CDCl<sub>3</sub>, δ): 164.34 (d, J = 54.3 Hz), 161.86 (d, J = 54.0 Hz), 141.90, 138.36, 135.76 (d, J = 3.2 Hz), 134.70, 133.09 (d, J = 7.8 Hz), 115.28 (d, J = 10.0 Hz), 115.28 (d, J = 23.2 Hz), 114.64 (d, J = 21.7 Hz), 93.45, 85.33 ppm. <sup>19</sup>F{<sup>1</sup>H} NMR (CDCl<sub>3</sub>, δ): -111.10, -113.27 ppm. ESI(+)-HRMS (m/z): calcd. for [C<sub>101</sub><sup>13</sup>CH<sub>48</sub>F<sub>12</sub>+H]<sup>+</sup> 1502.3671; found 1502.3710 [M+H]<sup>+</sup>.

**Table S1.** Crystallographic data precursor **2a**, and macrocycles **3a–d**, isomorph **3a'**, and diferrocenyl derivative **5**.

| Compound                                                                                | <b>2a</b>                                       | <b>3a</b> · 2toluene             | <b>3a'</b>                       | <b>3b</b> · 2CH <sub>3</sub> CN                 | <b>3c</b> · 0.9CHCl <sub>3</sub>                                         | <b>3d</b> · CHCl <sub>3</sub>                                   | <b>5</b> · CHCl <sub>3</sub>                                    |
|-----------------------------------------------------------------------------------------|-------------------------------------------------|----------------------------------|----------------------------------|-------------------------------------------------|--------------------------------------------------------------------------|-----------------------------------------------------------------|-----------------------------------------------------------------|
| CCDC numbers                                                                            | 2550375                                         | 2550376                          | 2550377                          | 2550378                                         | 2550379                                                                  | 2550380                                                         | 2550381                                                         |
| Empirical formula                                                                       | C <sub>40</sub> H <sub>38</sub> Si <sub>2</sub> | C <sub>116</sub> H <sub>76</sub> | C <sub>102</sub> H <sub>60</sub> | C <sub>118</sub> H <sub>90</sub> N <sub>2</sub> | C <sub>102.9</sub> H <sub>48.90</sub> Cl <sub>2.70</sub> F <sub>12</sub> | C <sub>59</sub> H <sub>47</sub> Cl <sub>3</sub> Fe <sub>2</sub> | C <sub>59</sub> H <sub>47</sub> Cl <sub>3</sub> Fe <sub>2</sub> |
| Formula weight                                                                          | 1469.76                                         | 1469.76                          | 1285.50                          | 1535.91                                         | 1608.83                                                                  | 974.01                                                          | 974.01                                                          |
| Temperature (K)                                                                         | 100.00(10)                                      | 100.00(10)                       | 100.00(10)                       | 100.00(10)                                      | 100.00(10)                                                               | 100.00(10)                                                      | 100.00(10)                                                      |
| Wavelength (Å)                                                                          | 1.54184                                         | 1.54184                          | 1.54184                          | 1.54184                                         | 1.54184                                                                  | 1.54184                                                         | 1.54184                                                         |
| Crystal system                                                                          | Monoclinic                                      | Monoclinic                       | Triclinic                        | Monoclinic                                      | Triclinic                                                                | Triclinic                                                       | Triclinic                                                       |
| Space group                                                                             | <i>P</i> 2 <sub>1</sub> / <i>n</i>              | <i>I</i> 2/ <i>a</i>             | <i>P</i> -1                      | <i>P</i> 2 <sub>1</sub> / <i>n</i>              | <i>P</i> -1                                                              | <i>P</i> -1                                                     | <i>P</i> -1                                                     |
| <i>a</i> (Å)                                                                            | 12.1937(6)                                      | 21.4999(2)                       | 10.3845(7)                       | 12.65630(10)                                    | 15.0766(7)                                                               | 5.80560(10)                                                     | 5.80560(10)                                                     |
| <i>b</i> (Å)                                                                            | 5.9510(2)                                       | 20.89980(10)                     | 18.1721(11)                      | 36.6318(3)                                      | 16.3859(8)                                                               | 15.9743(6)                                                      | 15.9743(6)                                                      |
| <i>c</i> (Å)                                                                            | 47.117(3)                                       | 21.7375(2)                       | 23.6809(16)                      | 18.7282(2)                                      | 22.1854(13)                                                              | 25.2401(5)                                                      | 25.2401(5)                                                      |
| $\alpha$ (°)                                                                            | 90.00                                           | 90.00                            | 71.279(6)                        | 90.00                                           | 75.966(5)                                                                | 83.365(2)                                                       | 83.365(2)                                                       |
| $\beta$ (°)                                                                             | 90.923(5)                                       | 117.3860(10)                     | 85.550(6)                        | 95.1360(10)                                     | 76.006(4)                                                                | 86.052(2)                                                       | 86.052(2)                                                       |
| $\gamma$ (°)                                                                            | 90.00                                           | 90.00                            | 87.146(5)                        | 90.00                                           | 68.247(4)                                                                | 87.760(3)                                                       | 87.760(3)                                                       |
| <i>V</i> (Å <sup>3</sup> )                                                              | 3394.1(3)                                       | 8672.93(14)                      | 4218.1(5)                        | 8647.96(14)                                     | 4867.8(5)                                                                | 2318.44(11)                                                     | 2318.44(11)                                                     |
| <i>Z</i>                                                                                | 4                                               | 4                                | 2                                | 4                                               | 2                                                                        | 2                                                               | 2                                                               |
| $\rho_{\text{calcd}}$ (g·cm <sup>-3</sup> )                                             | 1.125                                           | 1.126                            | 1.012                            | 1.180                                           | 1.098                                                                    | 1.395                                                           | 1.395                                                           |
| $\mu$ (mm <sup>-1</sup> )                                                               | 1.127                                           | 0.483                            | 0.437                            | 0.509                                           | 1.319                                                                    | 6.906                                                           | 6.906                                                           |
| <i>F</i> (000)                                                                          | 1244                                            | 3088                             | 1344                             | 3248                                            | 1640                                                                     | 1008                                                            | 1008                                                            |
| Crystal size/mm                                                                         | 0.177·0.055·0.032                               | 0.225·0.100·0.046                | 0.141·0.028·0.025                | 0.161·0.064·0.051                               | 0.217·0.047·0.037                                                        | 0.212·0.037·0.028                                               | 0.212·0.037·0.028                                               |
| $\theta$ range / °                                                                      | 3.660–66.489                                    | 3.117–55.491                     | 3.706–66.500                     | 2.658–66.499                                    | 2.946–66.496                                                             | 2.786–66.497                                                    | 2.786–66.497                                                    |
| Refl. collected                                                                         | 41346                                           | 57852                            | 50526                            | 104525                                          | 52749                                                                    | 22201                                                           | 22201                                                           |
| Indep. Refl.                                                                            | 5903                                            | 7641                             | 14711                            | 15171                                           | 16946                                                                    | 8011                                                            | 8011                                                            |
| <i>R</i> <sub>int</sub>                                                                 | 0.1577                                          | 0.0346                           | 0.3661                           | 0.0466                                          | 0.0912                                                                   | 0.0847                                                          | 0.0847                                                          |
| Transmission factors (min/max)                                                          | 0.863/1.000                                     | 0.604/1.000                      | 1.000/1.000                      |                                                 | 0.809/1.000                                                              | 0.680/1.000                                                     | 0.680/1.000                                                     |
| Data/restraints/param.                                                                  | 5903/64/418                                     | 7641/0/563                       | 14711/1224/1077                  | 15171/2/1095                                    | 16946/0/1099                                                             | 8011/120/637                                                    | 8011/120/637                                                    |
| <i>R</i> 1, <sup>a</sup> <i>wR</i> 2 <sup>b</sup> ( <i>I</i> > 2 $\sigma$ ( <i>I</i> )) | 0.1069, 0.2796                                  | 0.0375, 0.0943                   | 0.1074, 0.2297                   | 0.0646, 0.1799                                  | 0.0762, 0.1994                                                           | 0.0664, 0.1610                                                  | 0.0664, 0.1610                                                  |
| <i>R</i> 1, <sup>a</sup> <i>wR</i> 2 <sup>b</sup> (all data)                            | 0.1428, 0.3012                                  | 0.0409, 0.0962                   | 0.2799, 0.2872                   | 0.0786, 0.1885                                  | 0.1204, 0.2188                                                           | 0.0901, 0.1705                                                  | 0.0901, 0.1705                                                  |
| Quality-of-fit <sup>c</sup>                                                             | 1.049                                           | 1.019                            | 0.835                            | 1.038                                           | 0.997                                                                    | 1.061                                                           | 1.061                                                           |

$$R_{\text{int}} = \frac{\sum |F_o^2 - \langle F_o^2 \rangle|}{\sum |F_o^2|}$$

$$^a R1 = \frac{\sum ||F_o| - |F_c||}{\sum |F_o|}, \quad ^b wR2 = \frac{[\sum [w(F_o^2 - F_c^2)^2]]}{[\sum [w(F_o^2)^2]]}$$

$$^c \text{Quality-of-fit} = \frac{[\sum [w(F_o^2 - F_c^2)^2]]}{(N_{\text{obs}} - N_{\text{params}})}^{1/2}, \text{ based on all data.}$$

## Chemical Reduction of 3a

All manipulations were carried out using break-and-seal and glove-box techniques under an atmosphere of argon.<sup>18</sup> Tetrahydrofuran (THF) and hexanes (Sigma Aldrich) were dried over Na/benzophenone and distilled prior to use. THF-*d*<sub>8</sub> (Sigma Aldrich) was dried over NaK<sub>2</sub> alloy and vacuum-transferred. Rubidium (99.5 %), [2.2.2]cryptand (99.0%), and 18-crown-6 ether (99.0 %) were purchased from Sigma Aldrich and used as received. The UV-Vis absorption spectra were recorded on a Shimadzu UV-2600i UV-Vis spectrophotometer. The <sup>1</sup>H NMR spectra were recorded on a JEOL ECZR 600 spectrometer (600 MHz for <sup>1</sup>H). Chemical shifts (δ) are reported in parts per million (ppm) and referenced to the resonances of the corresponding solvent used. The EPR spectra were collected with an ADANI SPINSCAN X EPR spectrometer with the following parameters: center field = 335.00 mT, sweep width = 15 mT, sweep time = 60 s, modulation amplitude = 100 uT, attenuation = 20 dB. The oxygen- and moisture sensitivity of the reduced products, [Rb<sub>crypt</sub>]<sub>2</sub>[3a] and [Rb<sub>crown</sub>]<sub>2</sub>[3a], prevented obtaining elemental analysis data.

### Preparation of [Rb(cryptand)]<sub>2</sub>[3a]·2THF·C<sub>6</sub>H<sub>14</sub> ([Rb<sub>crypt</sub>]<sub>2</sub>[3a]·2THF·C<sub>6</sub>H<sub>14</sub>)

THF (1.0 mL) was added to a customized glass system containing Rb metal (2.0 mg, 0.023 mmol), **3a** (2.0 mg, 0.002 mmol), and [2.2.2]cryptand (1.5 mg, 0.004 mmol). The mixture was allowed to stir under argon at 25 °C for 40 minutes in a closed system. The initial red color of the suspension changed to red purple after 20 minutes, blue-violet after 35 minutes and remained the same until the reaction was stopped. After 40 minutes, the violet suspension was filtered, and the violet filtrate was layered with 1.0 mL hexanes. The ampule was sealed and kept at 5 °C. After 5 days, black plates formed in the ampule. Yield: 1.5 mg, 39%. UV-vis (THF): λ<sub>max</sub> 382, 516, 690 nm.

### Preparation of [Rb(18-crown-6)]<sub>2</sub>[3a]·3.5THF ([Rb<sub>crypt</sub>]<sub>2</sub>[3a]·3.5THF)

THF (1.0 mL) was added to a customized glass system containing Rb metal (2.0 mg, 0.023 mmol), **3a** (2.0 mg, 0.002 mmol), and 18-crown-6 (1.0 mg, 0.004 mmol). The mixture was allowed to stir under argon at 25 °C for 30 minutes in a closed system. The initial red color of the suspension changed to red purple after 10 minutes, blue after 20 minutes and remained the same until the reaction was stopped. After 30 minutes, the blue suspension was filtered, and the blue filtrate was layered with 1.0 mL hexanes. The ampule was sealed and kept at 5 °C. After 5 days, black needles formed in the ampule. Yield: 2.1 mg, 60%. UV-vis (THF): λ<sub>max</sub> 328, 364, 570, 720 nm.

## UV-vis Spectroscopic Investigation

**Sample preparation (in situ 3a/Rb):** THF (3.0 mL) was added to a quartz cuvette containing **3a** (0.3 mg, 0.0002 mmol) and Rb metal (1.0 mg, 0.0117 mmol) under argon atmosphere. The ampule was sealed with a Teflon stopper under argon. UV-vis absorption spectra were monitored at different reaction times at room temperature.

**Sample preparation (crystals):** THF (3.0 mL) was added to a quartz cuvette containing crystalline solids [Rb<sub>crypt</sub>]<sub>2</sub>[3a] (0.5 mg, 0.0002 mmol) or [Rb<sub>crown</sub>]<sub>2</sub>[3a] (0.3 mg, 0.0001 mmol) under argon atmosphere. The ampule was sealed with a Teflon stopper under argon. UV-vis absorption spectra were collected at room temperature.

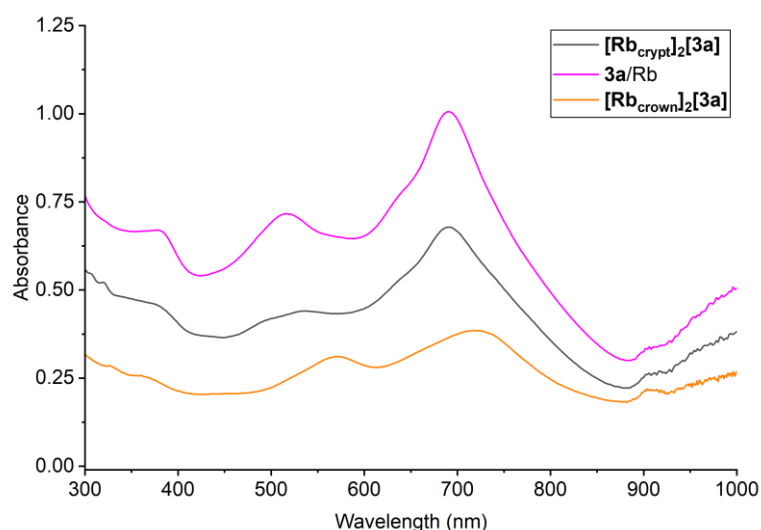

**Fig. S5.** UV-Vis spectra of crystalline samples of [Rb<sub>crypt</sub>]<sub>2</sub>[3a] and [Rb<sub>crown</sub>]<sub>2</sub>[3a] dissolved in THF in comparison to the in situ generated 3a<sup>2-</sup>/Rb at room temperature.

<sup>18</sup> W. Stawski, Y. Zhu, Z. Wei, M. A. Petrukhina, H. L. Anderson, *Chem. Sci.* **2023**, *14*, 14109–14114.

## NMR and EPR Spectroscopic Investigation

**Sample preparation (solution):** Crystals of  $[\text{Rb}_{\text{crypt}}]_2[\mathbf{3a}]$  (2.0 mg, 0.0009 mmol) or  $[\text{Rb}_{\text{crown}}]_2[\mathbf{3a}]$  (1.0 mg, 0.0003 mmol) were washed with fresh hexanes, dried under vacuum, dissolved in  $\text{THF-}d_8$  (~0.7 mL), and transferred into an NMR tube (O.D. 5 mm). The tube was sealed under argon, and the NMR and EPR spectra were collected at room temperature.

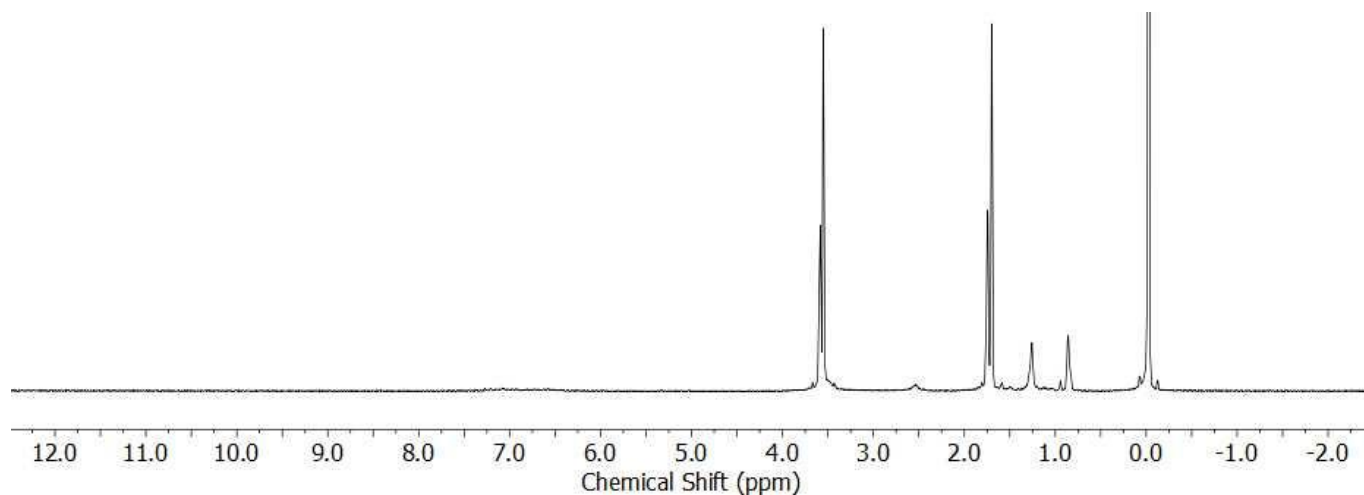

**Fig. S6.**  $^1\text{H}$  NMR spectrum of crystals of  $[\text{Rb}_{\text{crypt}}]_2[\mathbf{3a}]$  dissolved in  $\text{THF-}d_8$  at 25 °C.

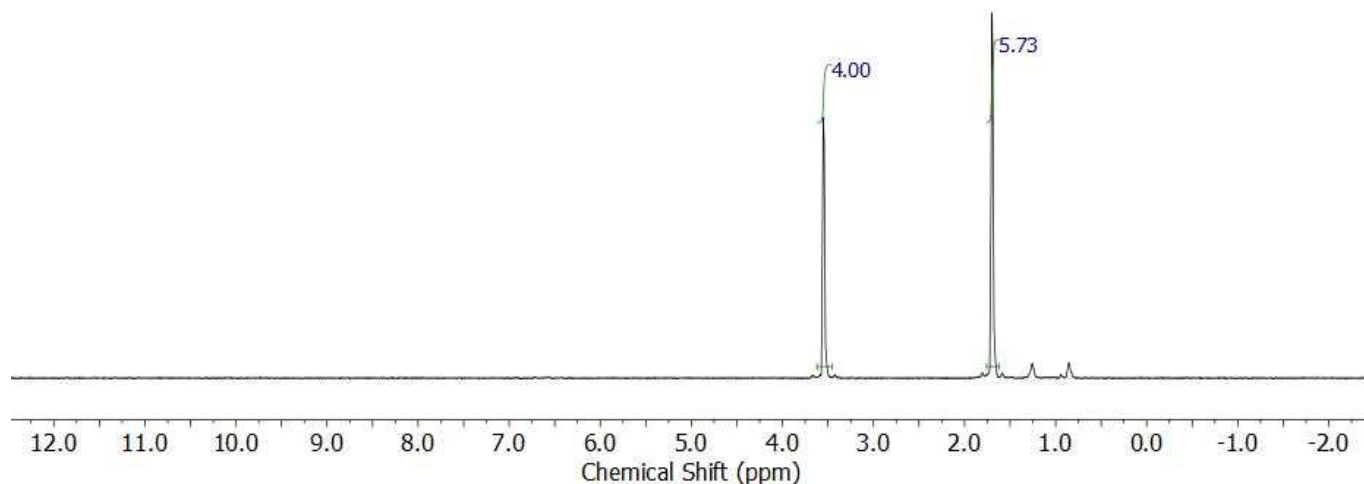

**Fig. S7.**  $^1\text{H}$  NMR spectrum of crystals of  $[\text{Rb}_{\text{crown}}]_2[\mathbf{3a}]$  dissolved in  $\text{THF-}d_8$  at 25 °C.

**Sample preparation (solid):** Crystals of  $[\text{Rb}_{\text{crypt}}]_2[\mathbf{3a}]$  (1.5 mg, 0.0006 mmol) were washed with fresh hexanes, dried under vacuum, and transferred into an NMR tube (O.D. 5 mm). The tube was sealed under argon, and the EPR spectra were collected at variable temperature.

**Sample preparation (in situ):** THF (0.8 mL) was added to an NMR tube containing excess Rb metal (2.0 mg, 0.0233 mmol),  $\mathbf{3a}$  (1.0 mg, 0.0008 mmol), and [2.2.2]cryptand (1.0 mg, 0.0026 mmol). The tube was sealed under argon. EPR spectra was monitored at different reaction time at 30 °C.

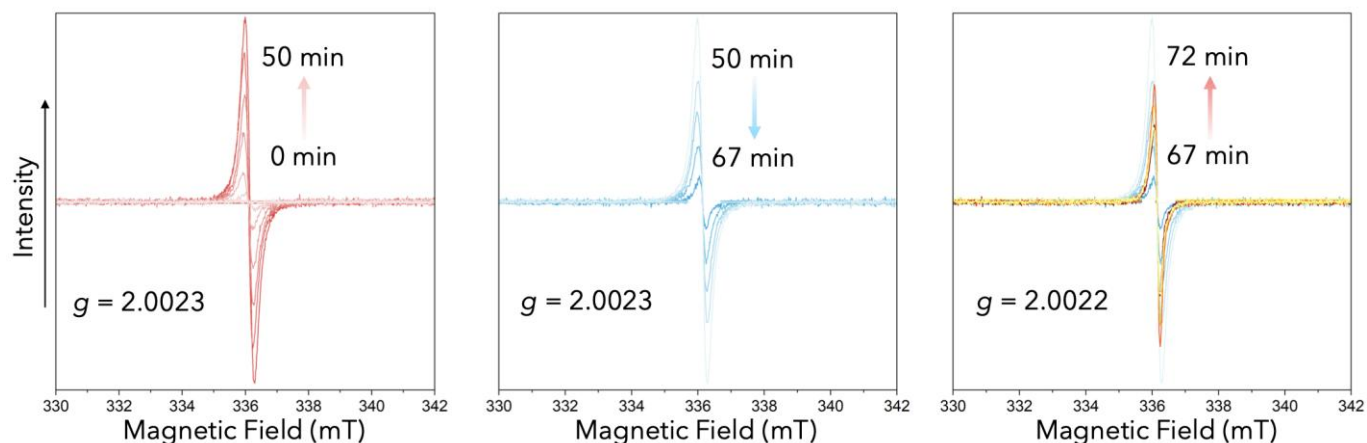

**Fig. S8.** EPR spectra of **3a**/Rb/crypt at different reaction time in THF at 30 °C.

### Crystal Structure Solution and Refinement

Data collections of **[Rb<sub>crypt</sub>]<sub>2</sub>[3a]** and **[Rb<sub>crypt</sub>]<sub>2</sub>[3a]** were performed at 100.00(10) K on a Rigaku XtaLAB Synergy-S X-ray diffractometer equipped with a HyPix-6000HE hybrid photon counting (HPC) detector and a microfocus Cu-K $\alpha$  radiation ( $\lambda = 1.54184 \text{ \AA}$ ). Data collection strategy to ensure completeness and desired redundancy was determined using CrysAlisPro.<sup>19</sup> Data processing was performed also using CrysAlisPro. Empirical absorption correction was applied using the SCALE3 ABSPACK scaling algorithm.<sup>20</sup> The structures were solved by SHELXT (version 2018/2)<sup>21</sup> and refined by full-matrix least-squares procedures using the SHELXL (version 2019/3)<sup>22</sup> software through the OLEX2 graphical interface.<sup>23</sup> All non-hydrogen atoms, including those in disordered parts, were refined anisotropically. Hydrogen atoms were included in idealized positions for structure factor calculations with  $U_{\text{iso}}(\text{H}) = 1.2 U_{\text{eq}}(\text{C})$  and  $U_{\text{iso}}(\text{H}) = 1.5 U_{\text{eq}}(\text{C})$  for methyl groups. In **[Rb<sub>crypt</sub>]<sub>2</sub>[3a]**, one THF molecule and two phenyl groups were found to be disordered. In **[Rb<sub>crypt</sub>]<sub>2</sub>[3a]**, one diphenylmethylene group was found to be disordered. The disordered parts were modeled with two orientations with their relative occupancies refined. The geometries of the disordered parts were restrained to be similar. They were also restrained to have the same  $U_{ij}$  components, with a standard uncertainty of  $0.01 \text{ \AA}^2$ . In each unit cell of **[Rb<sub>crypt</sub>]<sub>2</sub>[3a]**, four hexanes solvent molecules were found to be severely disordered and removed by the Olex2's solvent mask subroutine.<sup>14</sup> The total void volume was  $1182.4 \text{ \AA}^3$ , equivalent to 9.21 % of the unit cell's total volume. In each unit cell of **[Rb<sub>crypt</sub>]<sub>2</sub>[3a]**, seven THF solvent molecules were found to be severely disordered and removed by the Olex2's solvent mask subroutine.<sup>14</sup> The total void volume was  $1187.9 \text{ \AA}^3$ , equivalent to 20.30 % of the unit cell's total volume. Besides, the structure of **[Rb<sub>crypt</sub>]<sub>2</sub>[3a]** was refined as a 2-component non-merohedral twin. Crystallographic data have been deposited at the Cambridge Crystallographic Data Centre. Further crystal and data collection details, along with CCDC numbers are listed in Table S1. These data can be obtained free of charge via <https://www.ccdc.cam.ac.uk/structures/>, or from the Cambridge Crystallographic Data Centre, 12 Union Road, Cambridge CB2 1EZ, U.KCB21EZ, UK (fax +441223336033; email [deposit@ccdc.cam.ac.uk](mailto:deposit@ccdc.cam.ac.uk)). The ORTEP drawings and additional structural figures, along with the key bond distances and angles, are also shown below.

<sup>19</sup> Rigaku Corporation. Rigaku Oxford Diffraction, CrysAlisPro Software System, Version 1.171.43.92a. 2023.

<sup>20</sup> Rigaku Oxford Diffraction. SCALE3 ABSPACK; A Rigaku Oxford Diffraction Program (1.0.11,Gui:1.0.7) (C). 2005.

<sup>21</sup> G. M. Sheldrick, *Acta Crystallogr. Sect. Found. Adv.* **2015**, *71*, 3–8.

<sup>22</sup> G. M. Sheldrick, *Acta Crystallogr. Sect. C Struct. Chem.* **2015**, *71*, 3–8.

<sup>23</sup> O. V. Dolomanov, L. J. Bourhis, R. J. Gildea, J. A. K. Howard, JH. Puschmann, *J. Appl. Crystallogr.* **2009**, *42*, 339–341.

**Table S2.** Crystallographic data of **[Rb<sub>crypt</sub>]<sub>2</sub>[3a]**·2THF·C<sub>6</sub>H<sub>14</sub> and **[Rb<sub>crown</sub>]<sub>2</sub>[3a]**·3.5THF.

| Compound                                                                                | <b>[Rb<sub>crypt</sub>]<sub>2</sub>[3a]</b> ·2THF·C <sub>6</sub> H <sub>14</sub> | <b>[Rb<sub>crown</sub>]<sub>2</sub>[3a]</b> ·3.5THF                  |
|-----------------------------------------------------------------------------------------|----------------------------------------------------------------------------------|----------------------------------------------------------------------|
| CCDC numbers                                                                            | 2551069                                                                          | 2551070                                                              |
| Empirical formula                                                                       | C <sub>152</sub> H <sub>162</sub> N <sub>4</sub> O <sub>14</sub> Rb <sub>2</sub> | C <sub>140</sub> H <sub>136</sub> O <sub>15.50</sub> Rb <sub>2</sub> |
| Formula weight                                                                          | 2439.79                                                                          | 2237.42                                                              |
| Temperature (K)                                                                         | 100.00(10)                                                                       | 100.00(10)                                                           |
| Wavelength (Å)                                                                          | 1.54184                                                                          | 1.54184                                                              |
| Crystal system                                                                          | Monoclinic                                                                       | Triclinic                                                            |
| Space group                                                                             | <i>C2/c</i>                                                                      | <i>P-1</i>                                                           |
| <i>a</i> (Å)                                                                            | 23.90607(12)                                                                     | 13.01556(12)                                                         |
| <i>b</i> (Å)                                                                            | 26.15504(9)                                                                      | 18.7307(2)                                                           |
| <i>c</i> (Å)                                                                            | 22.71299(9)                                                                      | 25.82470(16)                                                         |
| $\alpha$ (°)                                                                            | 90.00                                                                            | 96.6869(7)                                                           |
| $\beta$ (°)                                                                             | 115.3036(6)                                                                      | 90.9842(6)                                                           |
| $\gamma$ (°)                                                                            | 90.00                                                                            | 110.3305(9)                                                          |
| <i>V</i> (Å <sup>3</sup> )                                                              | 12839.05(11)                                                                     | 5852.20(10)                                                          |
| <i>Z</i>                                                                                | 4                                                                                | 2                                                                    |
| $\rho_{\text{calcd}}$ (g·cm <sup>-3</sup> )                                             | 1.262                                                                            | 1.270                                                                |
| $\mu$ (mm <sup>-1</sup> )                                                               | 1.505                                                                            | 1.606                                                                |
| <i>F</i> (000)                                                                          | 5152                                                                             | 2348                                                                 |
| Crystal size (mm)                                                                       | 0.09×0.11×0.21                                                                   | 0.05×0.10×0.32                                                       |
| $\theta$ range for data collection (°)                                                  | 3.380–79.864                                                                     | 2.537–79.719                                                         |
| Reflections collected                                                                   | 80954                                                                            | 135186                                                               |
| Independent reflections                                                                 | 13826<br>[ <i>R</i> <sub>int</sub> = 0.0201]                                     | 135186<br>[ <i>R</i> <sub>int</sub> = 0.0542]                        |
| Transmission factors (min/max)                                                          | 0.80074/1.00000                                                                  | 0.79974/1.00000                                                      |
| Data/restraints/params.                                                                 | 13826/550/904                                                                    | 135186/493/1374                                                      |
| <i>R</i> 1, <sup>a</sup> <i>wR</i> 2 <sup>b</sup> ( <i>I</i> > 2 $\sigma$ ( <i>I</i> )) | 0.0320, 0.0853                                                                   | 0.0919, 0.2526                                                       |
| <i>R</i> 1, <sup>a</sup> <i>wR</i> 2 <sup>b</sup> (all data)                            | 0.0331, 0.0861                                                                   | 0.0982, 0.2562                                                       |
| Quality-of-fit <sup>c</sup>                                                             | 1.050                                                                            | 1.026                                                                |

$$R_{\text{int}} = \frac{\sum |F_o^2 - \langle F_o^2 \rangle|}{\sum |F_o^2|}$$

$${}^a R1 = \frac{\sum ||F_o| - |F_c||}{\sum |F_o|}, \quad {}^b wR2 = \frac{[\sum [w(F_o^2 - F_c^2)^2]]}{[\sum [w(F_o^2)^2]]}$$

$${}^c \text{Quality-of-fit} = \frac{[\sum [w(F_o^2 - F_c^2)^2]]}{(N_{\text{obs}} - N_{\text{params}})}^{1/2}, \text{ based on all data.}$$

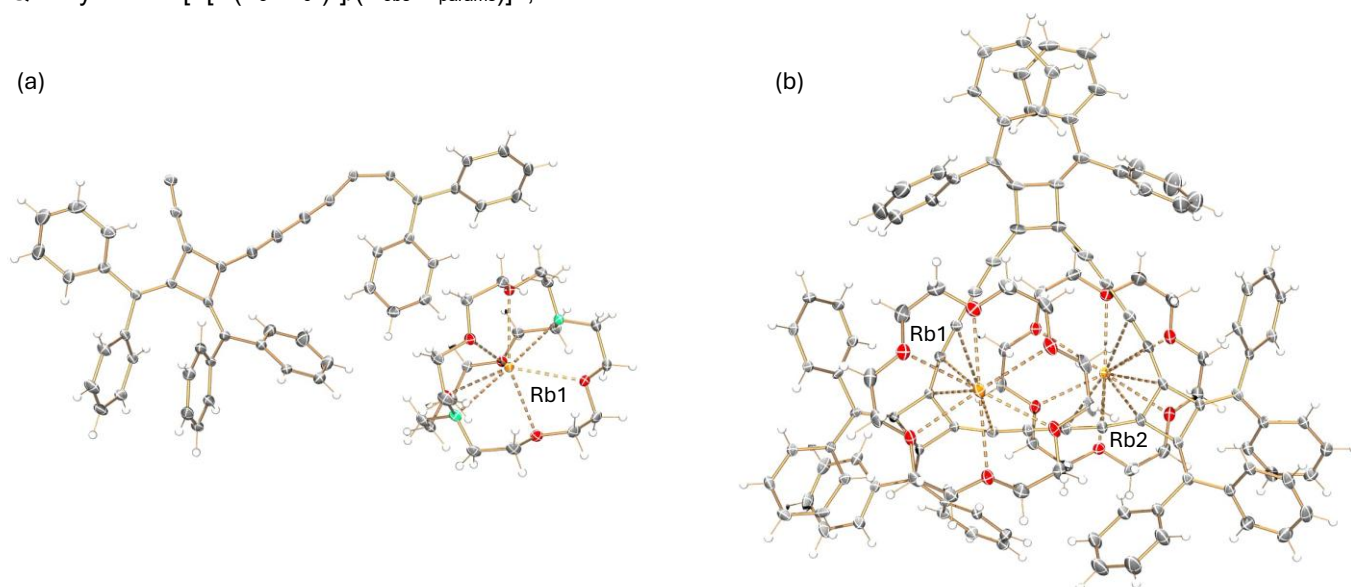**Fig. S9.** ORTEP drawing of the asymmetric unit of (a) **[Rb<sub>crypt</sub>]<sub>2</sub>[3a]** and (b) **[Rb<sub>crown</sub>]<sub>2</sub>[3a]**, drawn with thermal ellipsoids at the 30% probability level. The interstitial solvent molecules are omitted for clarity. Color key: C grey, O red, N spring green, H white, and Rb orange. Due to symmetry, only one cation moiety and half of the dianion were shown in the asymmetric unit of **[Rb<sub>crypt</sub>]<sub>2</sub>[3a]**.

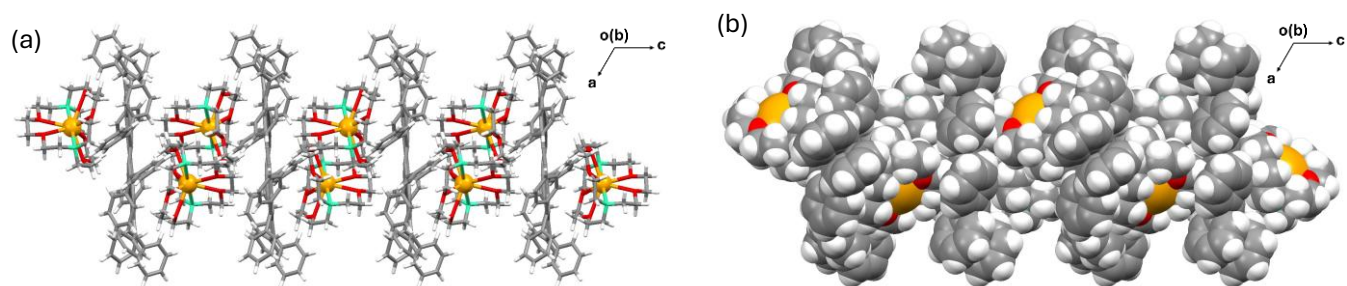

**Fig. S10.** 1D column packing of  $[\text{Rb}_{\text{crypt}}]_2[\mathbf{3a}]$ , (a) mixed and (c) space-filling models.

**Table S3.** Selected distances (Å) and angles (°) in  $\mathbf{3a}$  and its dianions, along with the labeling schemes.

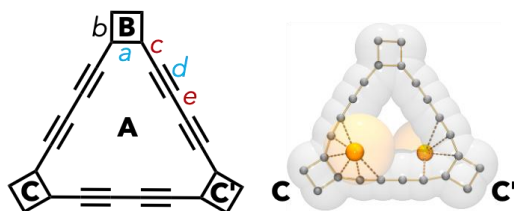

| Bonds    | $\mathbf{3a}$     | $[\text{Rb}_{\text{crypt}}]_2[\mathbf{3a}]$ | $[\text{Rb}_{\text{crown}}]_2[\mathbf{3a}]$ |
|----------|-------------------|---------------------------------------------|---------------------------------------------|
| <i>a</i> | 1.399(2)/1.400(2) | 1.438(2)/1.439(3)                           | 1.420(5)–1.452(5)                           |
| <i>b</i> | 1.484(2)–1.491(2) | 1.475(2)–1.481(2)                           | 1.458(5)–1.490(5)                           |
| <i>c</i> | 1.386(2)–1.390(2) | 1.365(2)–1.372(2)                           | 1.342(5)–1.386(5)                           |
| <i>d</i> | 1.218(2)–1.222(2) | 1.216(2)–1.230(2)                           | 1.218(5)–1.266(5)                           |
| <i>e</i> | 1.350(2)          | 1.330(3)/1.341(2)                           | 1.305(5)–1.358(5)                           |
| RMSD/A   | $\mathbf{3a}$     | $[\text{Rb}_{\text{crypt}}]_2[\mathbf{3a}]$ | $[\text{Rb}_{\text{crown}}]_2[\mathbf{3a}]$ |
| A        | 0.163             | 0.124                                       | 0.222                                       |
| B        | 0.040             | 0.019                                       | 0.045                                       |
| C(C')    | 0.030             | 0.022                                       | 0.043/0.054                                 |

## Quantum Chemical Computations.

**Table S4.** Singlet-Triplet Gibbs free energy gap of neutral **3m**.

| Functional           | <b>3m</b> (neutral) |         |
|----------------------|---------------------|---------|
| CAM-B3LYP/def2-TZVPP | 41.1 kcal/mol       | 1.78 eV |
| M06-2X/def2-TZVPP    | 47.0 kcal/mol       | 2.04 eV |

**Table S5.** Frontier Orbitals of **3m** and **3m<sup>2-</sup>**.

| Nr         | <b>3m</b> | <b>[3m]<sup>2-</sup></b> |
|------------|-----------|--------------------------|
| HOMO-29/31 |           |                          |
| HOMO-3     |           |                          |
| HOMO-2     |           |                          |
| HOMO-1     |           |                          |
| HOMO       |           |                          |

|        |                                                                                    |                                                                                      |
|--------|------------------------------------------------------------------------------------|--------------------------------------------------------------------------------------|
| LUMO   | 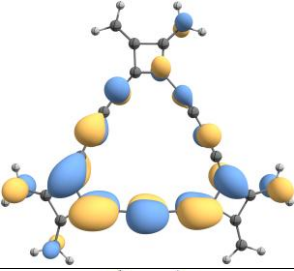  |   |
| LUMO+1 |   |   |
| LUMO+2 |   |   |
| LUMO+3 |  |  |

# NMR spectra of new compounds

## 2a

MK-U-374B-2-F3.10.fid

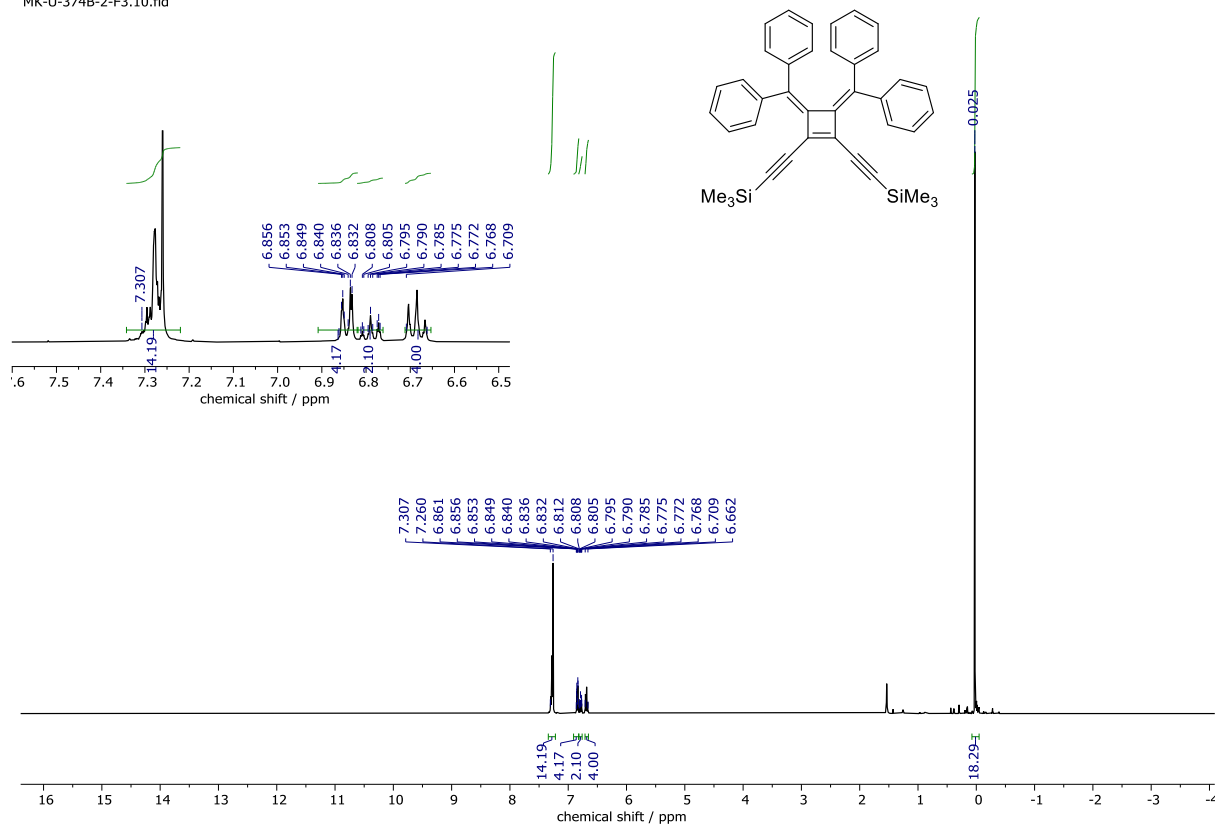

MK-U-374B-2-F3.11.fid

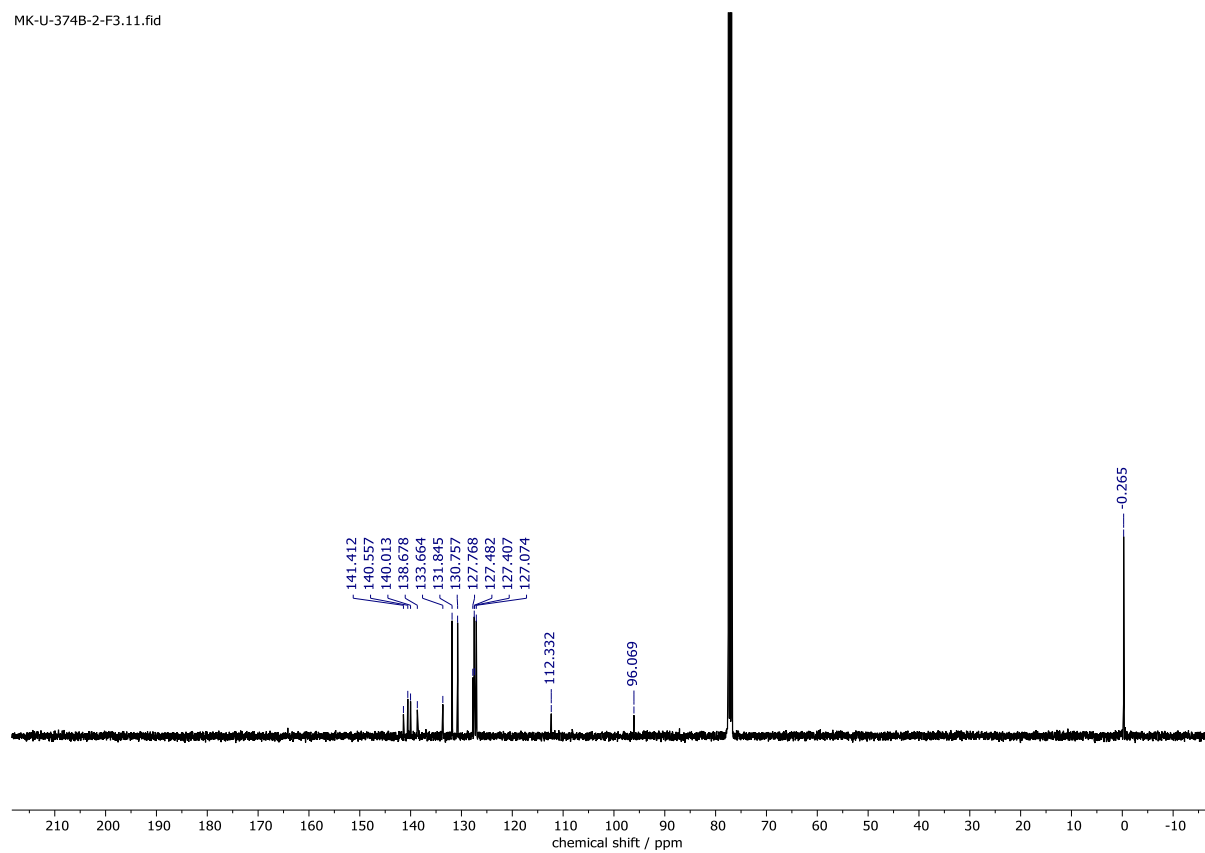

2b

MK-U-359E-DCM-raw.10.fid

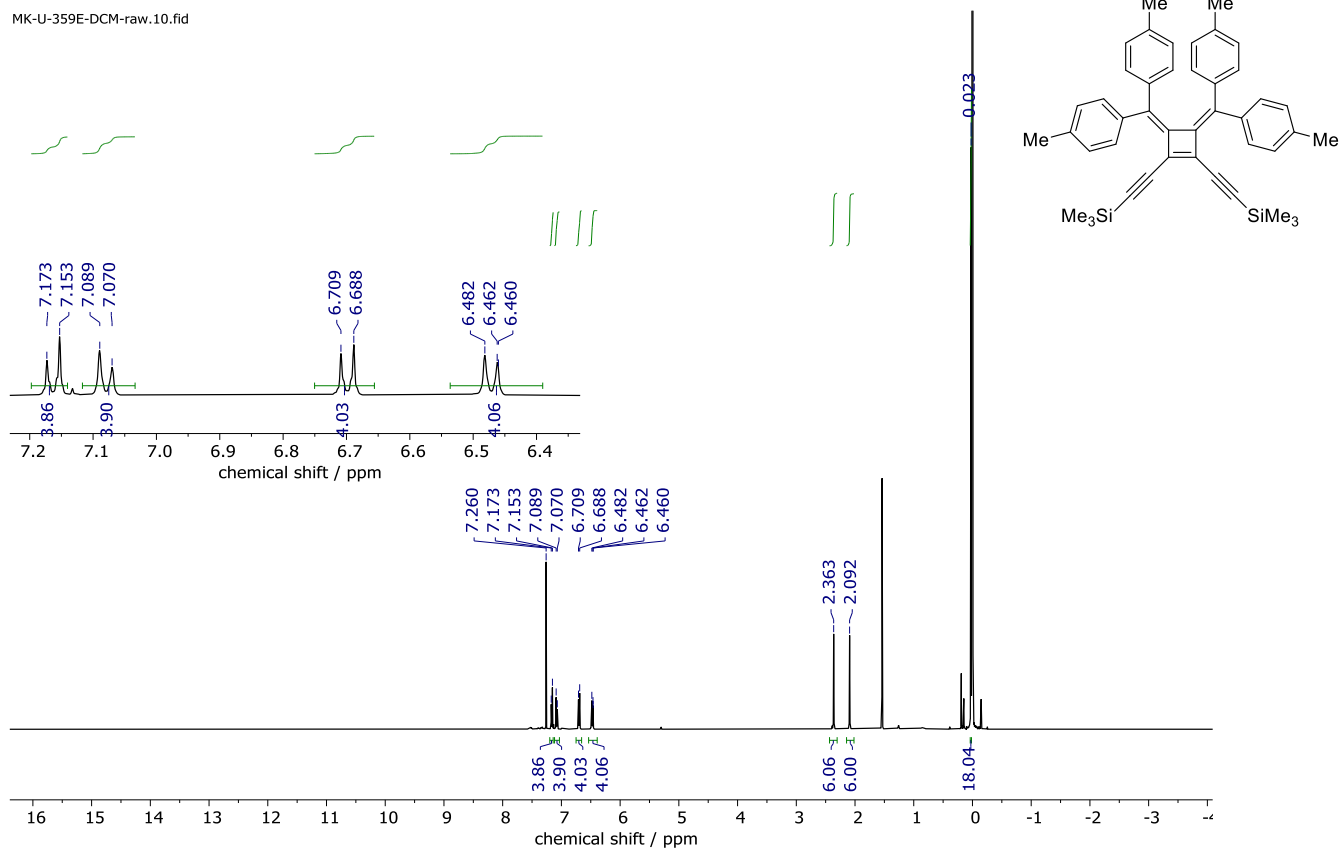

MK-U-359E-DCM-raw.12.fid

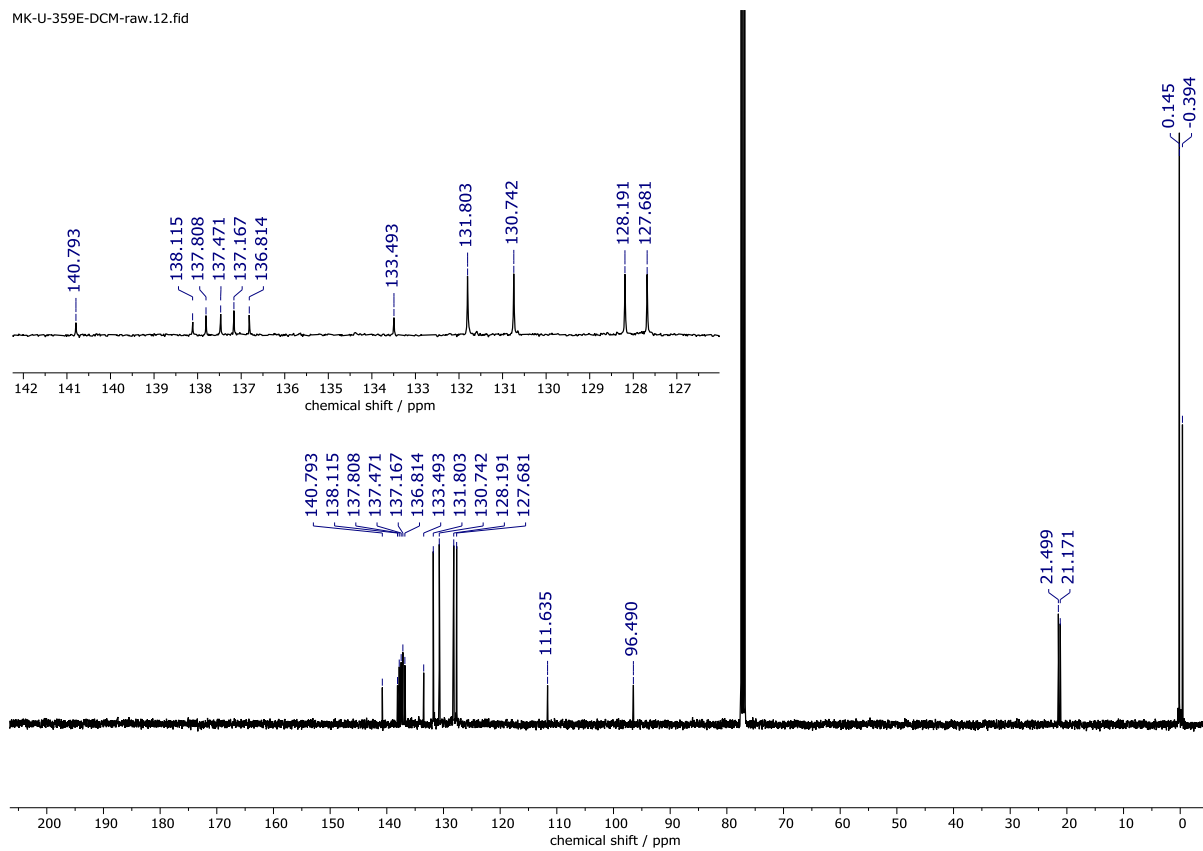

2c

MK-U-357F-F2.11.fid

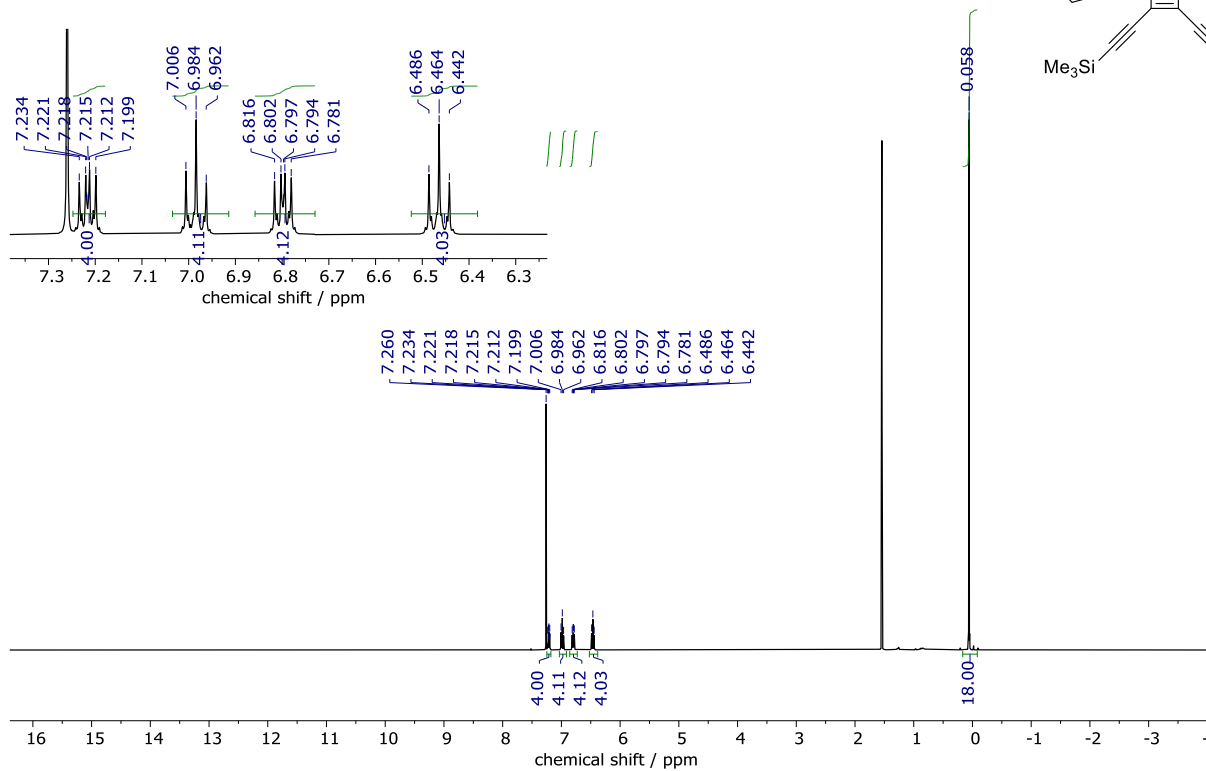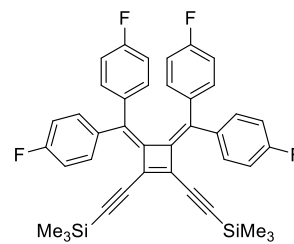

MK-U-357F-F1,5.12.fid

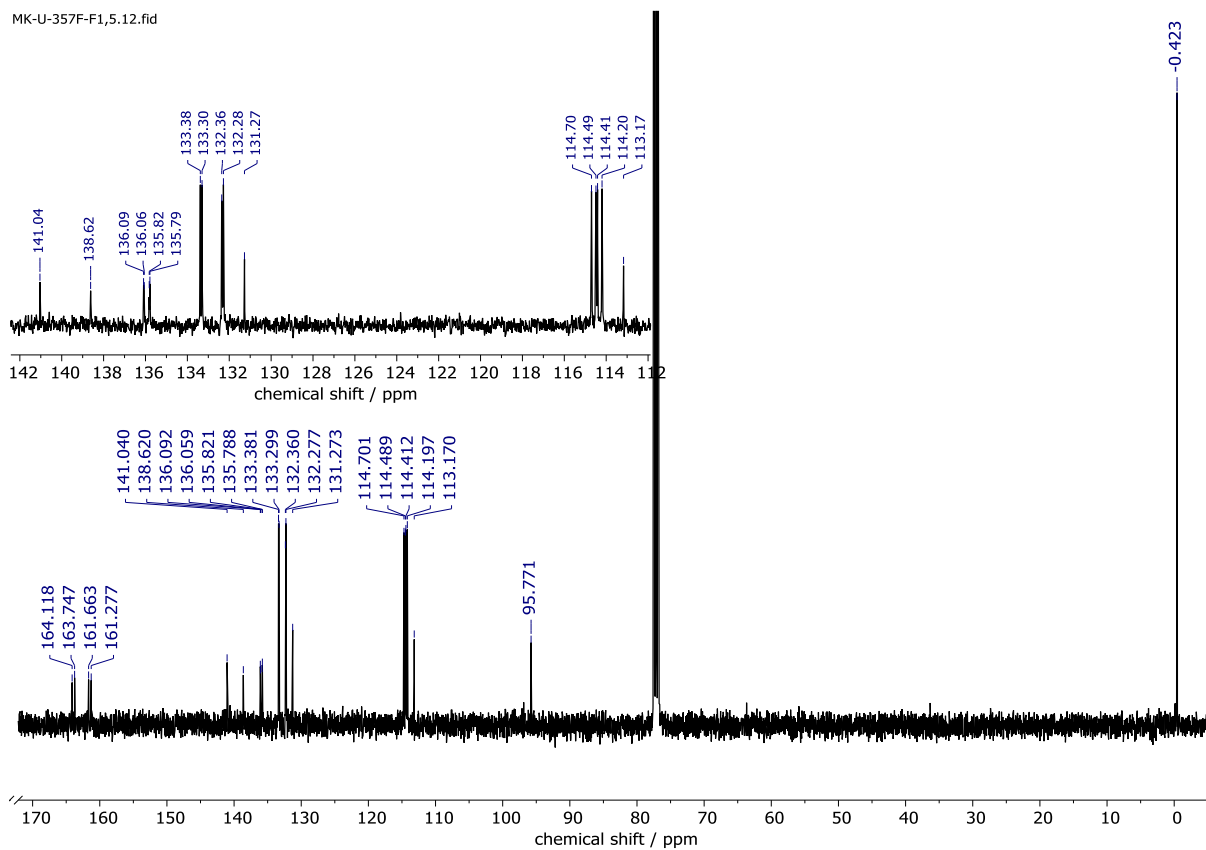

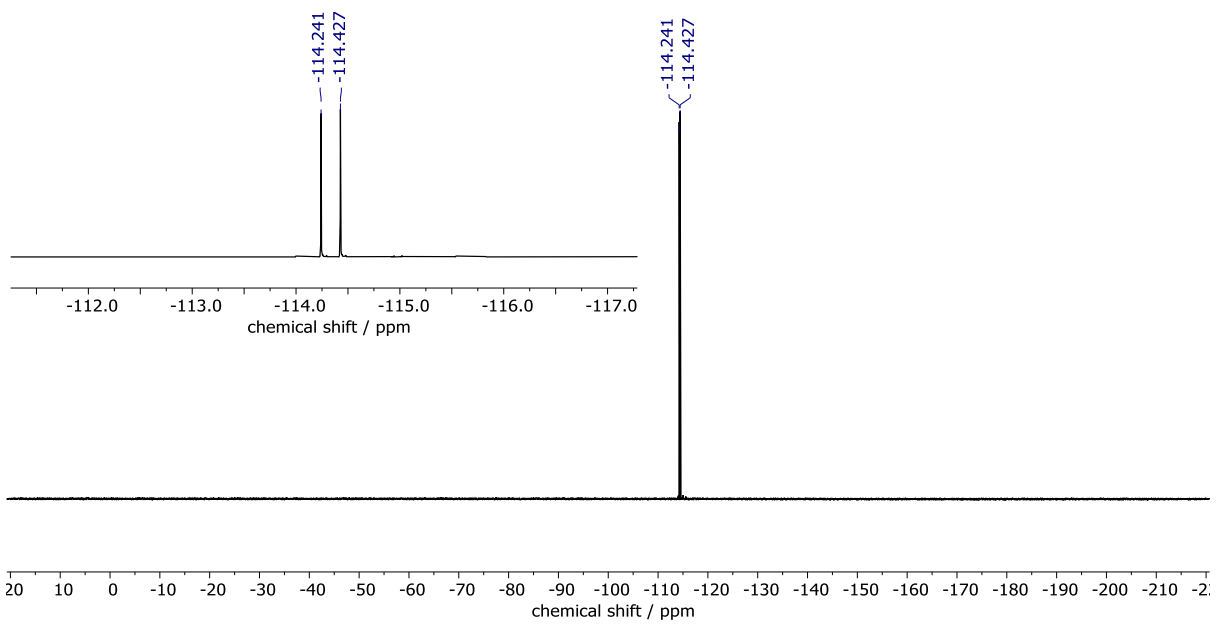

2d

smbhgh-III-P167-Starting Mat.10.fid

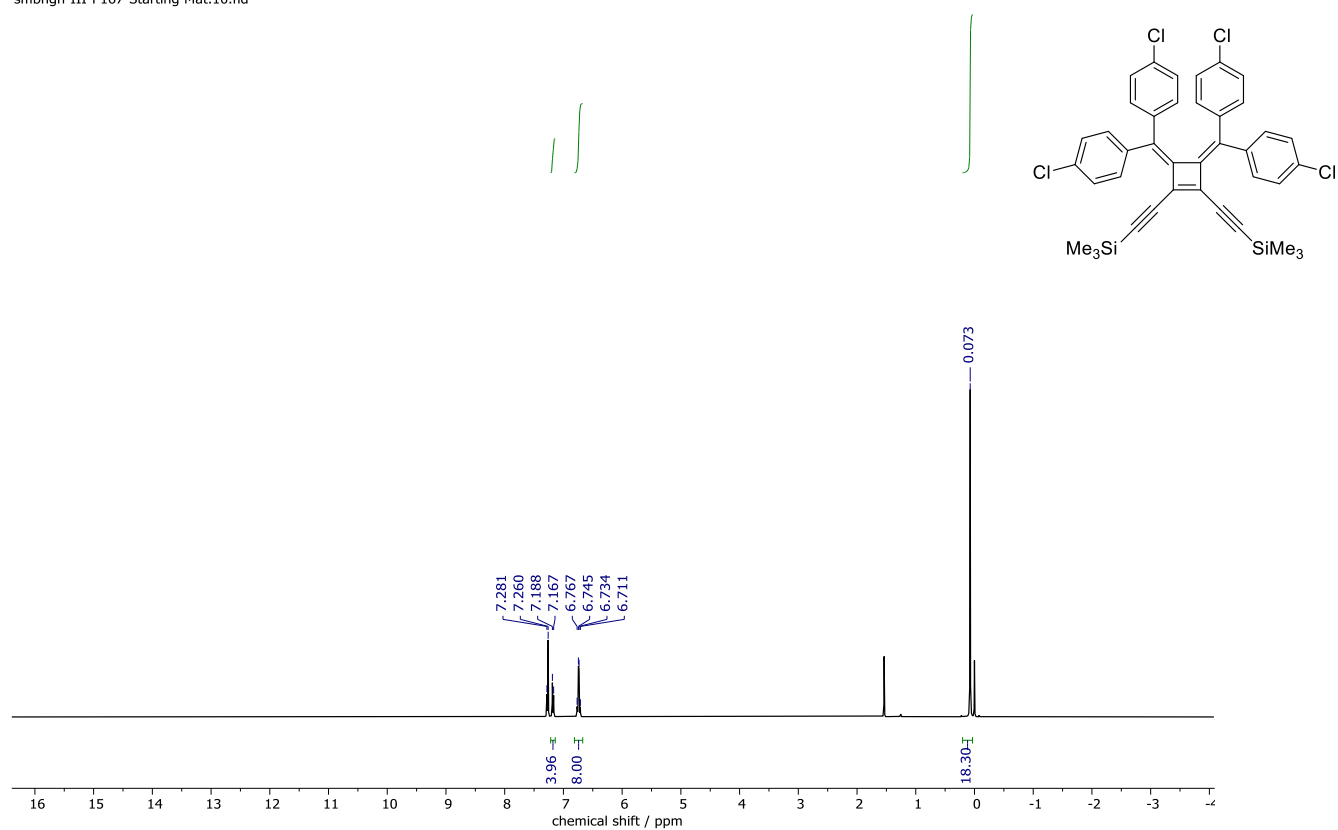

smbhgh-III-P167-Starting Mat.11.fid

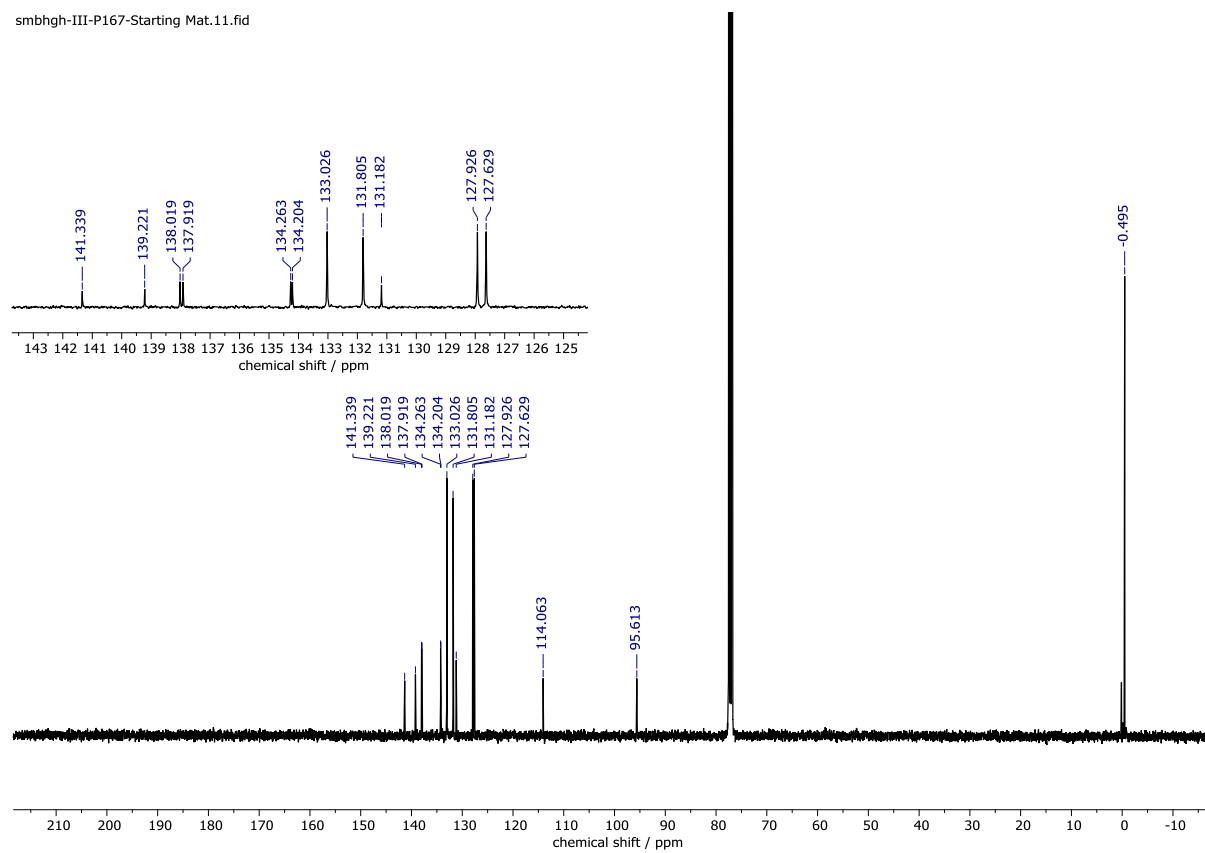

MK-U-387-F2.10.fid

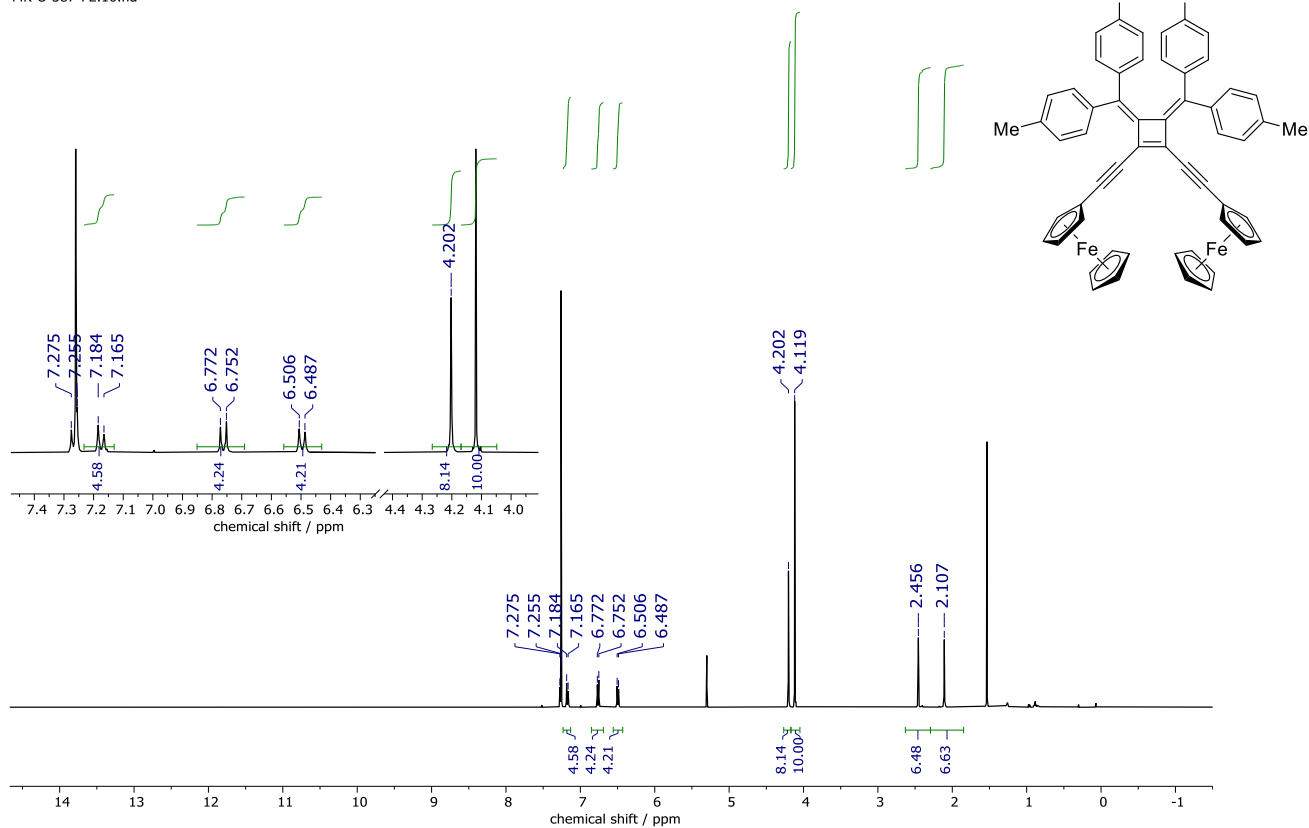

MK-U-387-F2.20.fid

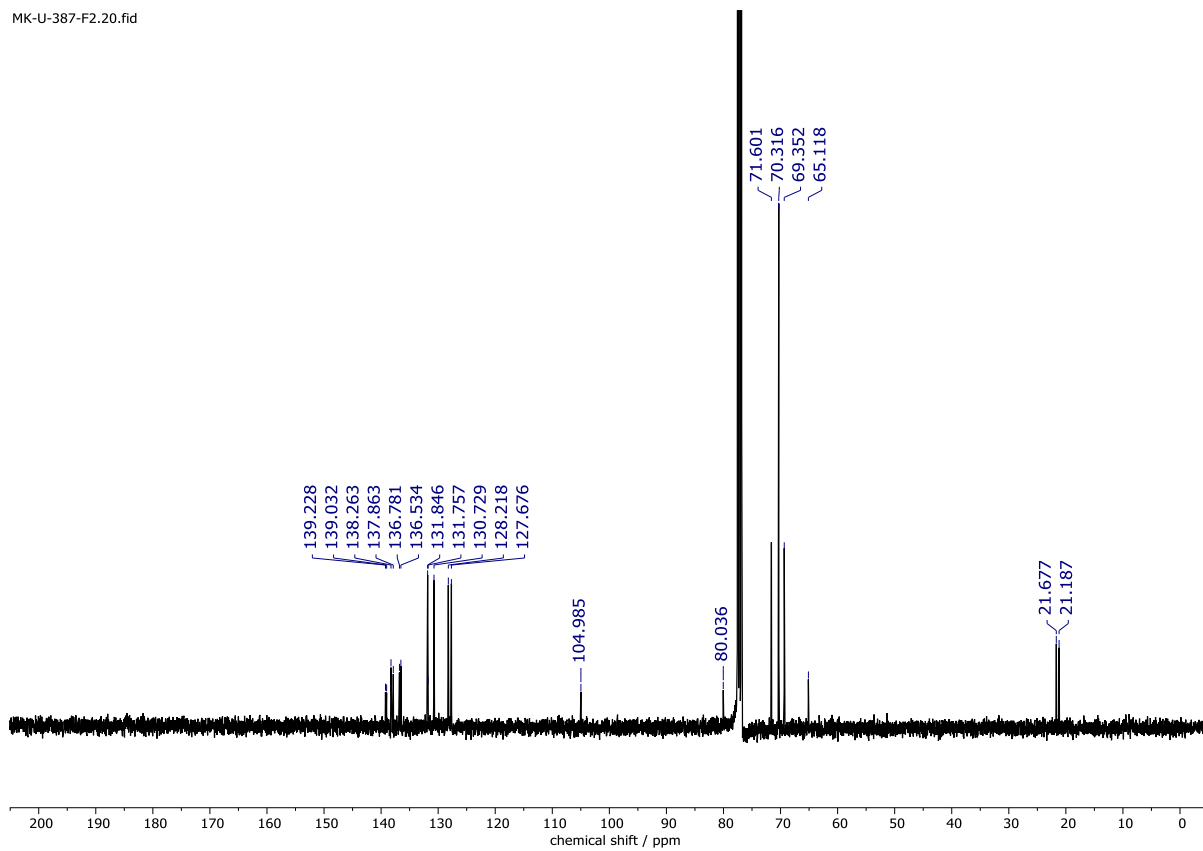

# Compound 3a

col-1-14 trimer.10.fid

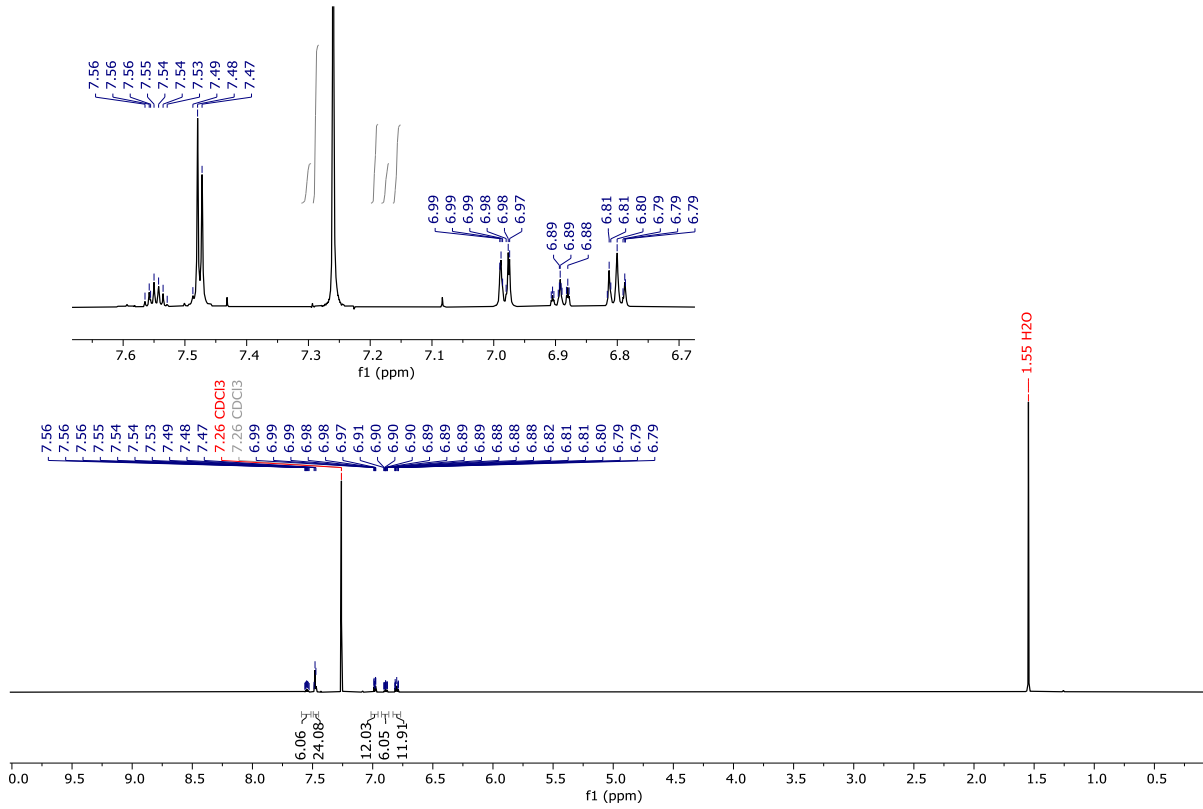

col-1-14 trimer.11.fid

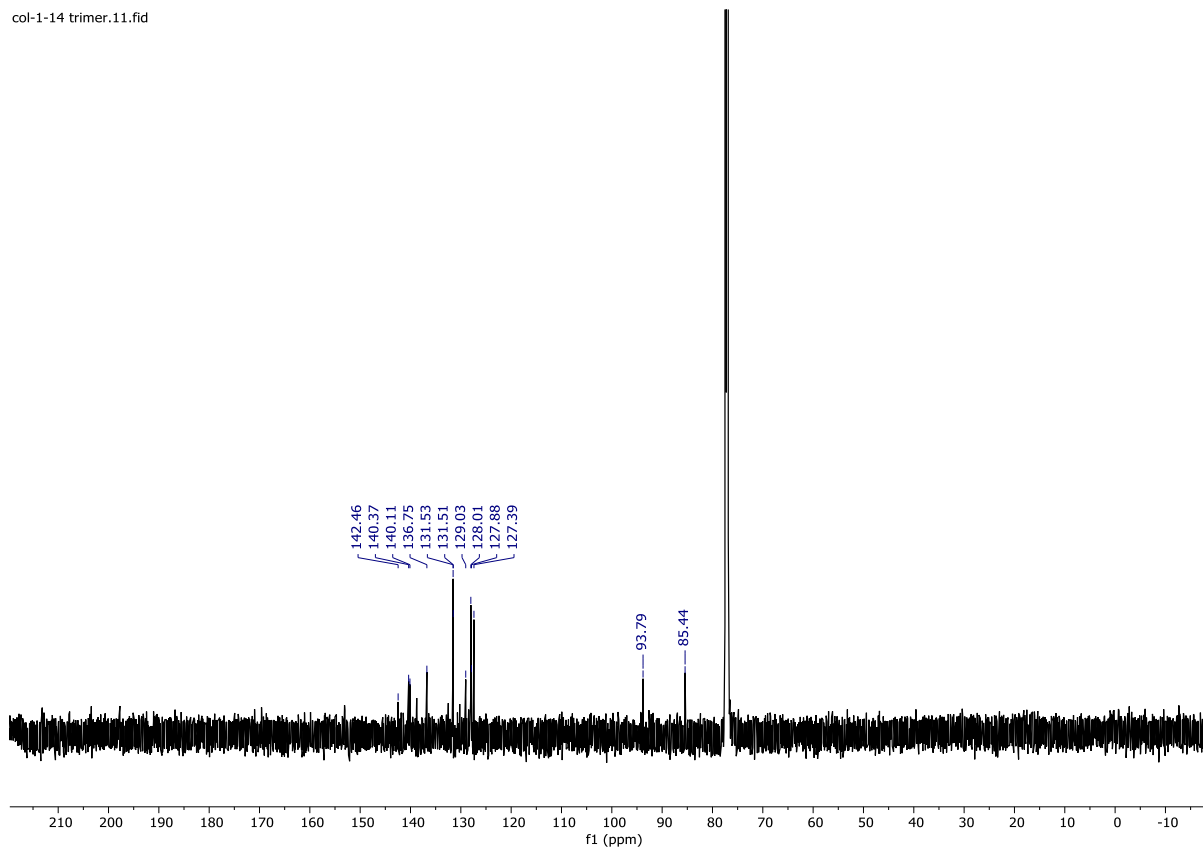

# Compound 3b

IYD-1-131 f20-25 trimer.10.fid

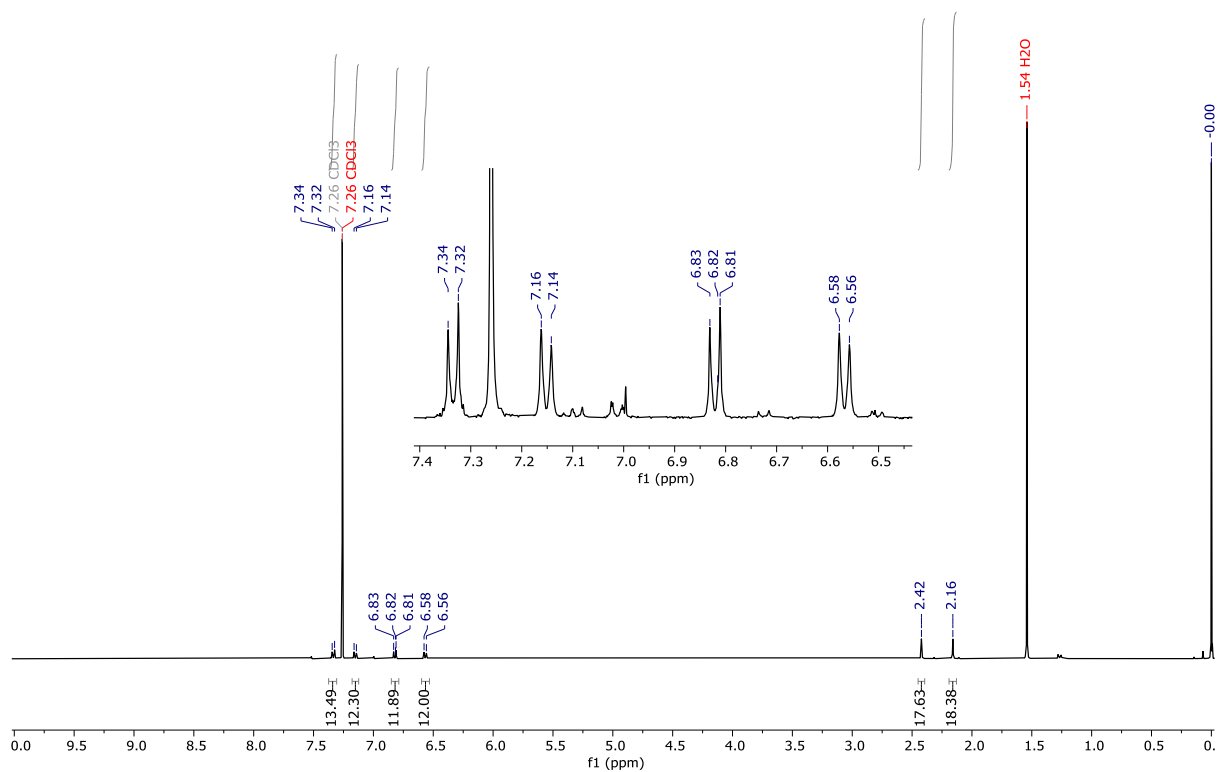

smbhgh-III-P166-F5-F11.11.fid

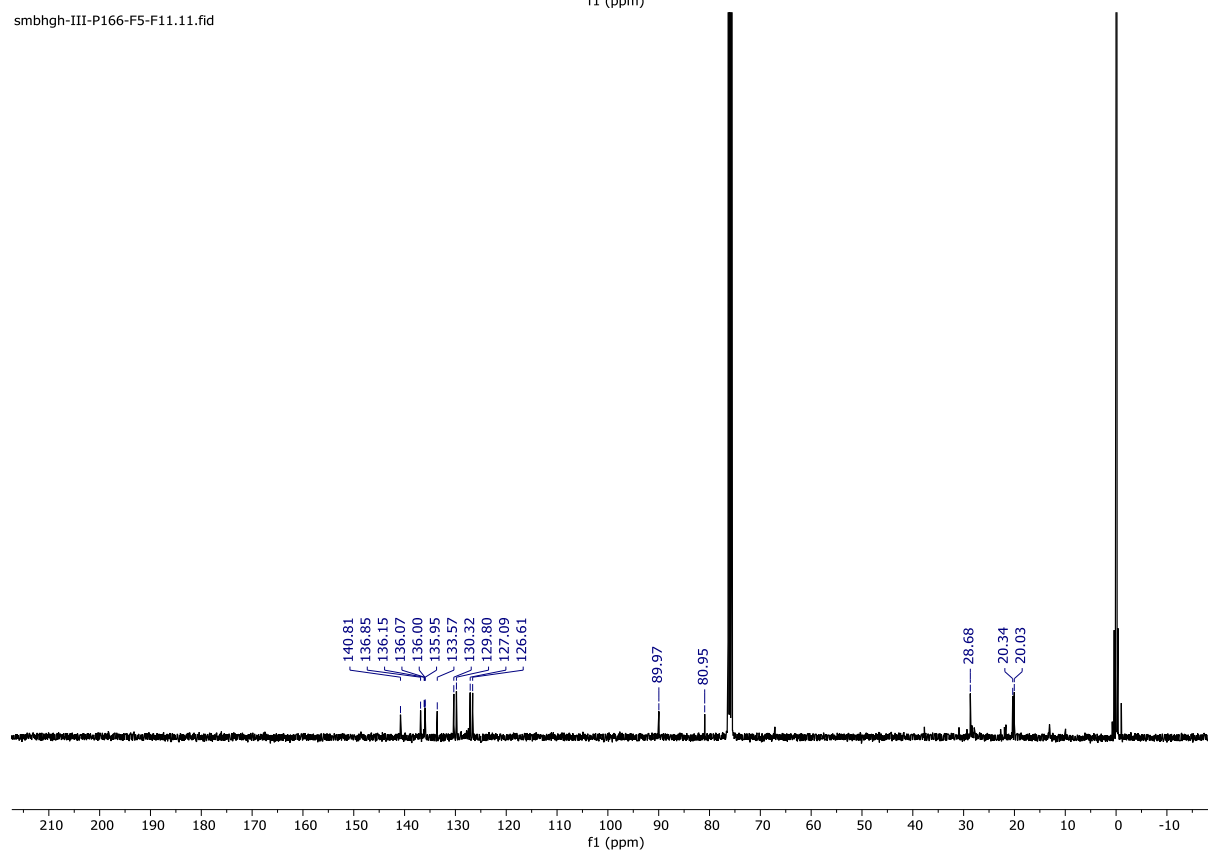

# Compound 3d

smbhgh-III-P78-F2-n1.10.fid

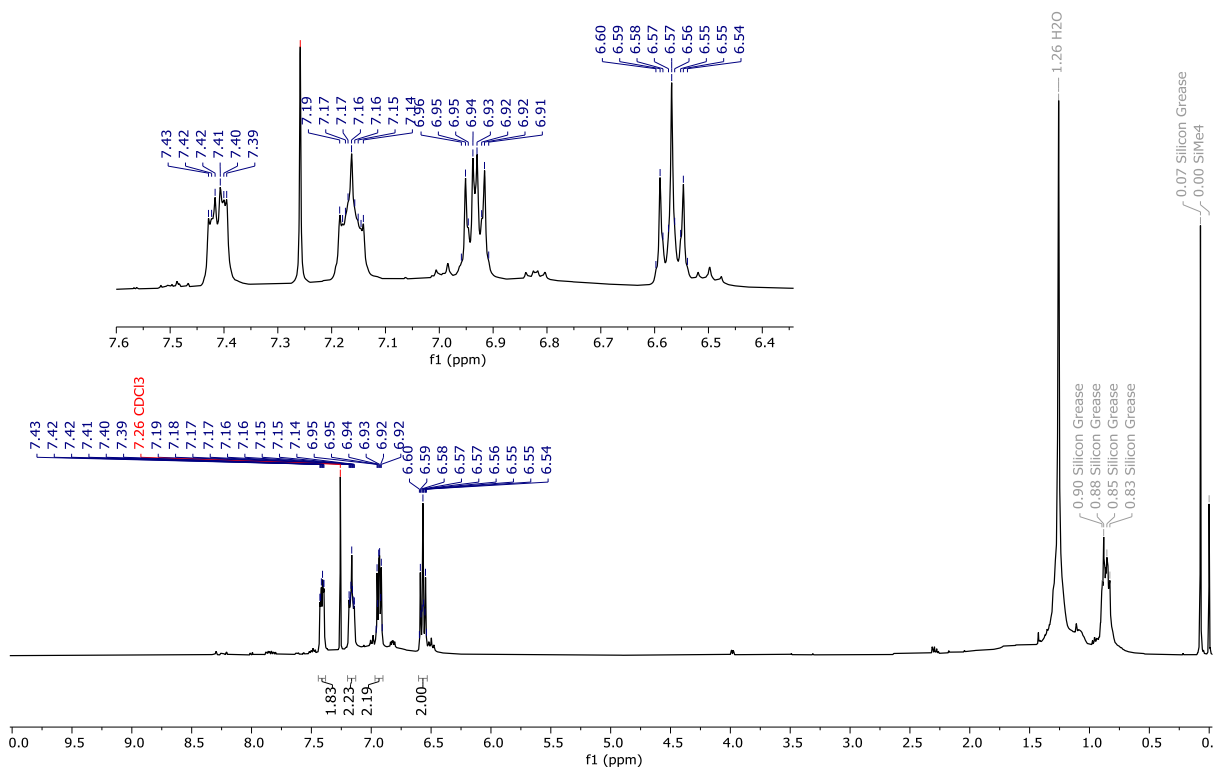

smbhgh-III-P78-F2-n1.11.fid

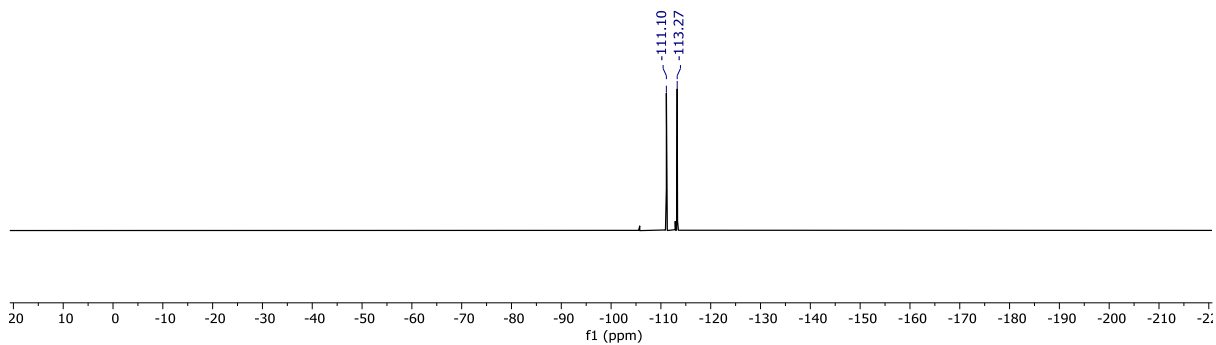

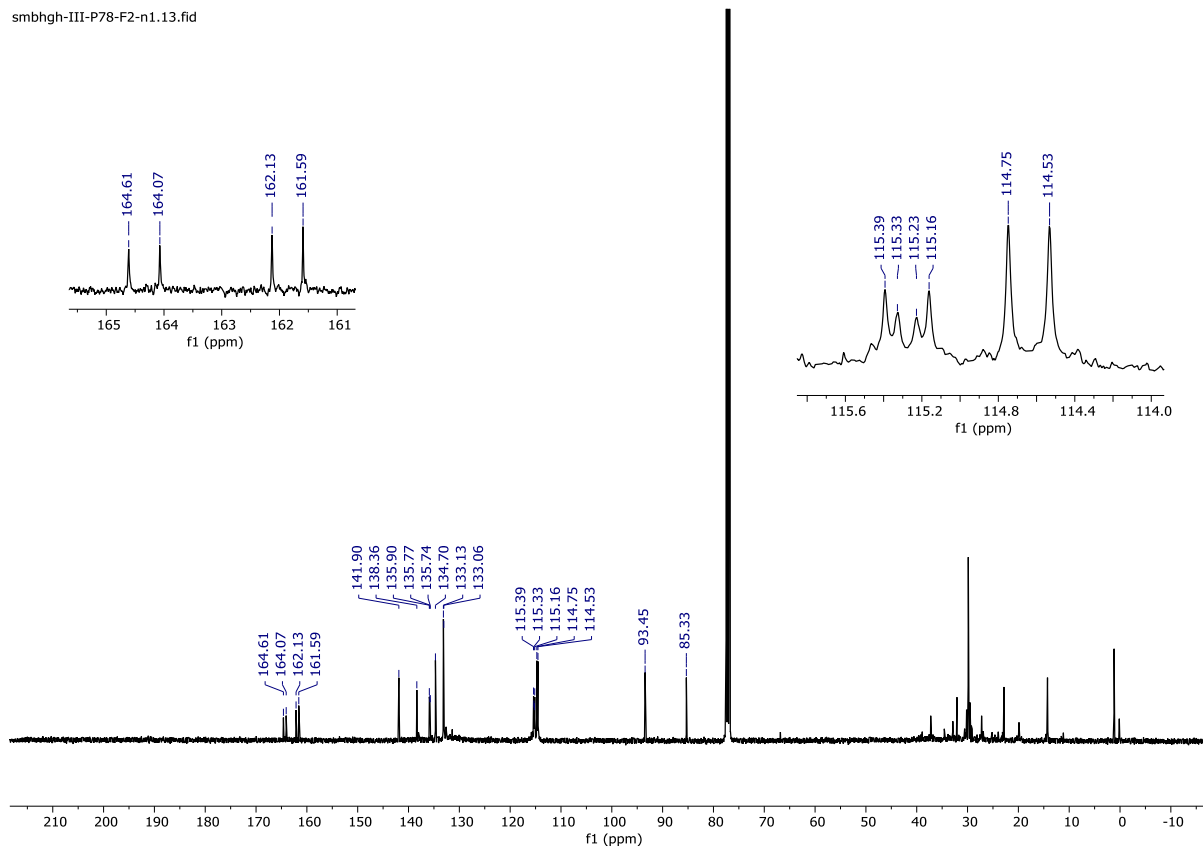

# Compound 3c

smbhgh-III-P167-F4-F29-After crys.10.fid

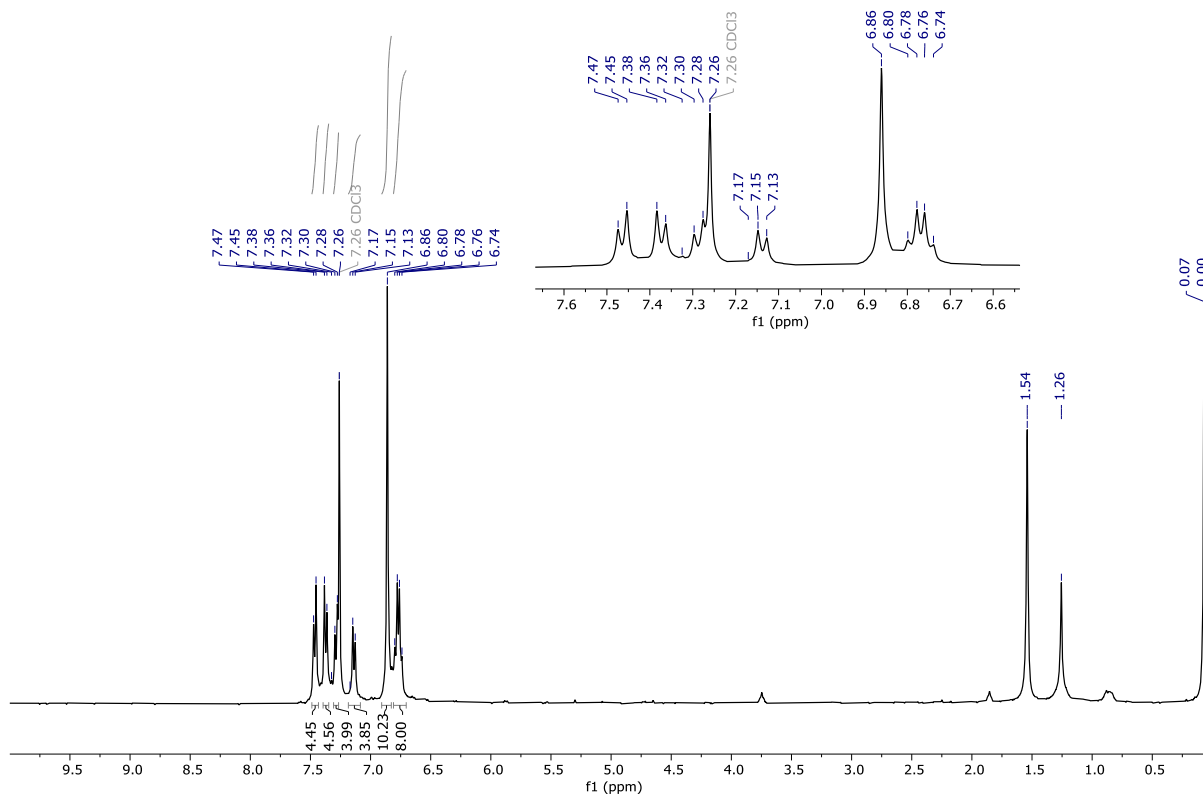

smbhgh-III-P167-F4-F29-After crys.11.fid

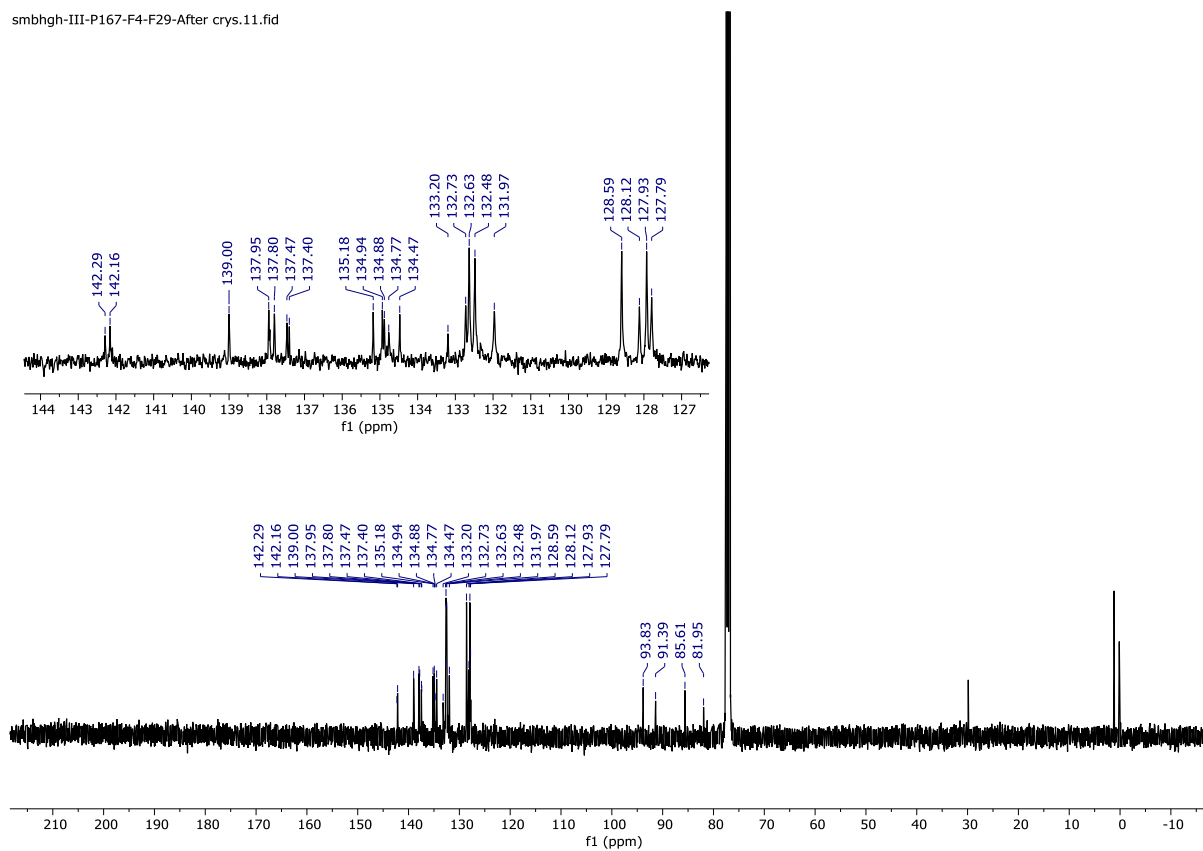

**Cartesian Coordinates of all the studied molecules (3a-3d, 3m)**

| <b>3a</b>                 |              |               |              | <b>3a</b>                 |              |               |              |
|---------------------------|--------------|---------------|--------------|---------------------------|--------------|---------------|--------------|
| <b>Cam-b3lyp/def2-SVP</b> |              |               |              | <b>Cam-b3lyp/def2-SVP</b> |              |               |              |
| <b>0 1</b>                |              |               |              | <b>0 3</b>                |              |               |              |
| 6                         | 1.499110000  | -3.971227000  | -0.069101000 | 6                         | -0.613807000 | -4.205842000  | -0.009671000 |
| 6                         | 0.144067000  | -4.247369000  | 0.021864000  | 6                         | -1.939491000 | -3.792920000  | -0.010002000 |
| 6                         | 0.390122000  | -5.708410000  | 0.177412000  | 6                         | -2.431716000 | -5.192178000  | 0.136653000  |
| 6                         | 1.860420000  | -5.415206000  | -0.030661000 | 6                         | -0.987624000 | -5.637946000  | 0.040940000  |
| 6                         | 3.021564000  | -6.066443000  | -0.266883000 | 6                         | -0.256382000 | -6.770172000  | -0.108031000 |
| 6                         | 3.113534000  | -7.516964000  | -0.566053000 | 6                         | -0.834686000 | -8.098012000  | -0.424768000 |
| 6                         | 4.185771000  | -8.277276000  | -0.075614000 | 6                         | -0.283083000 | -9.264023000  | 0.127830000  |
| 1                         | 4.936826000  | -7.798832000  | 0.555390000  | 1                         | 0.557246000  | -9.182624000  | 0.819443000  |
| 6                         | 4.297551000  | -9.629246000  | -0.375749000 | 6                         | -0.798028000 | -10.515505000 | -0.186812000 |
| 1                         | 5.134234000  | -10.205866000 | 0.024894000  | 1                         | -0.360770000 | -11.409884000 | 0.262599000  |
| 6                         | 3.347873000  | -10.247181000 | -1.186762000 | 6                         | -1.866499000 | -10.630196000 | -1.073771000 |
| 6                         | 2.288006000  | -9.501070000  | -1.694044000 | 6                         | -2.413262000 | -9.483156000  | -1.642112000 |
| 1                         | 1.543978000  | -9.974492000  | -2.338094000 | 1                         | -3.244997000 | -9.563583000  | -2.345138000 |
| 6                         | 2.172815000  | -8.148889000  | -1.388168000 | 6                         | -1.901560000 | -8.229898000  | -1.322368000 |
| 1                         | 1.347773000  | -7.565847000  | -1.799885000 | 1                         | -2.324853000 | -7.335612000  | -1.781896000 |
| 6                         | -0.417711000 | -6.716206000  | 0.575820000  | 6                         | -3.651127000 | -5.686163000  | 0.445796000  |
| 6                         | 0.055168000  | -8.037656000  | 1.058088000  | 6                         | -3.904505000 | -7.066890000  | 0.927799000  |
| 6                         | 1.163870000  | -8.152380000  | 1.904596000  | 6                         | -3.057028000 | -7.683026000  | 1.855704000  |
| 1                         | 1.707948000  | -7.252817000  | 2.195794000  | 1                         | -2.178166000 | -7.145347000  | 2.214278000  |
| 6                         | 1.565457000  | -9.394045000  | 2.387059000  | 6                         | -3.332326000 | -8.960864000  | 2.332360000  |
| 1                         | 2.432010000  | -9.462022000  | 3.048080000  | 1                         | -2.659109000 | -9.423563000  | 3.057047000  |
| 6                         | 0.865760000  | -10.544017000 | 2.033347000  | 6                         | -4.460996000 | -9.645889000  | 1.891987000  |
| 6                         | -0.245838000 | -10.443551000 | 1.199149000  | 6                         | -5.319230000 | -9.040481000  | 0.976244000  |
| 1                         | -0.803641000 | -11.339976000 | 0.919308000  | 1                         | -6.209623000 | -9.568636000  | 0.627914000  |
| 6                         | -0.651994000 | -9.202415000  | 0.724811000  | 6                         | -5.048374000 | -7.761145000  | 0.506767000  |
| 1                         | -1.529925000 | -9.128696000  | 0.080396000  | 1                         | -5.729725000 | -7.288082000  | -0.202804000 |
| 6                         | -1.890925000 | -6.496780000  | 0.619129000  | 6                         | -4.840753000 | -4.790731000  | 0.379270000  |
| 6                         | -2.610271000 | -6.771549000  | 1.790949000  | 6                         | -5.704487000 | -4.683293000  | 1.478642000  |
| 1                         | -2.080044000 | -7.149170000  | 2.667469000  | 1                         | -5.495773000 | -5.261772000  | 2.380737000  |
| 6                         | -3.981062000 | -6.554495000  | 1.849294000  | 6                         | -6.808934000 | -3.841953000  | 1.434285000  |
| 1                         | -4.523439000 | -6.757359000  | 2.775333000  | 1                         | -7.462207000 | -3.758196000  | 2.305566000  |

|   |               |              |              |   |              |              |              |
|---|---------------|--------------|--------------|---|--------------|--------------|--------------|
| 6 | -4.661517000  | -6.074530000 | 0.731414000  | 6 | -7.080127000 | -3.103517000 | 0.283595000  |
| 6 | -3.962299000  | -5.818378000 | -0.443123000 | 6 | -6.241776000 | -3.215808000 | -0.820338000 |
| 1 | -4.488418000  | -5.441021000 | -1.321548000 | 1 | -6.447117000 | -2.639535000 | -1.724357000 |
| 6 | -2.587316000  | -6.028475000 | -0.499156000 | 6 | -5.131176000 | -4.054026000 | -0.773335000 |
| 1 | -2.042424000  | -5.830436000 | -1.424056000 | 1 | -4.479007000 | -4.144341000 | -1.643959000 |
| 6 | -0.949376000  | -3.377551000 | 0.009324000  | 6 | -2.473846000 | -2.507449000 | -0.060145000 |
| 6 | -1.820156000  | -2.520214000 | -0.030295000 | 6 | -2.813650000 | -1.327568000 | -0.110273000 |
| 6 | -2.734175000  | -1.511528000 | -0.076273000 | 6 | -3.117313000 | -0.012462000 | -0.152566000 |
| 6 | -3.495030000  | -0.555052000 | -0.114166000 | 6 | -3.326921000 | 1.206296000  | -0.172735000 |
| 6 | -4.214405000  | 0.643129000  | -0.128189000 | 6 | -3.376532000 | 2.572639000  | -0.164995000 |
| 6 | -3.756399000  | 1.945159000  | 0.002157000  | 6 | -2.261943000 | 3.558611000  | 0.006125000  |
| 6 | -5.130076000  | 2.506868000  | -0.122445000 | 6 | -3.253354000 | 4.662781000  | -0.070046000 |
| 6 | -5.636302000  | 1.081155000  | -0.174319000 | 6 | -4.356380000 | 3.631708000  | -0.153598000 |
| 6 | -6.802089000  | 0.397490000  | -0.126720000 | 6 | -5.738545000 | 3.588642000  | -0.111035000 |
| 6 | -6.823874000  | -1.064406000 | -0.414357000 | 6 | -6.440263000 | 2.362215000  | -0.559693000 |
| 6 | -6.231281000  | -1.570468000 | -1.577141000 | 6 | -6.093343000 | 1.742810000  | -1.769305000 |
| 1 | -5.711920000  | -0.887850000 | -2.252205000 | 1 | -5.273318000 | 2.151455000  | -2.362192000 |
| 6 | -6.328405000  | -2.921914000 | -1.897198000 | 6 | -6.798843000 | 0.638636000  | -2.234602000 |
| 1 | -5.872568000  | -3.293259000 | -2.817690000 | 1 | -6.521849000 | 0.182853000  | -3.187628000 |
| 6 | -7.016673000  | -3.791014000 | -1.056478000 | 6 | -7.860731000 | 0.124526000  | -1.495003000 |
| 6 | -7.598773000  | -3.303259000 | 0.112750000  | 6 | -8.207021000 | 0.717761000  | -0.282176000 |
| 1 | -8.136293000  | -3.979959000 | 0.780842000  | 1 | -9.033049000 | 0.315736000  | 0.308718000  |
| 6 | -7.508975000  | -1.952800000 | 0.426816000  | 6 | -7.508749000 | 1.827366000  | 0.177739000  |
| 1 | -7.982374000  | -1.572614000 | 1.334003000  | 1 | -7.790952000 | 2.292504000  | 1.123745000  |
| 6 | -8.107292000  | 1.011819000  | 0.221804000  | 6 | -6.568272000 | 4.695056000  | 0.397315000  |
| 6 | -9.284828000  | 0.599906000  | -0.420261000 | 6 | -7.848436000 | 4.938224000  | -0.131028000 |
| 1 | -9.230335000  | -0.154317000 | -1.207185000 | 1 | -8.212890000 | 4.323835000  | -0.955464000 |
| 6 | -10.514587000 | 1.145503000  | -0.073512000 | 6 | -8.647242000 | 5.957708000  | 0.370180000  |
| 1 | -11.418150000 | 0.818676000  | -0.592921000 | 1 | -9.633501000 | 6.135417000  | -0.064093000 |
| 6 | -10.596099000 | 2.104394000  | 0.934147000  | 6 | -8.193261000 | 6.752003000  | 1.421173000  |
| 6 | -9.437984000  | 2.511059000  | 1.590381000  | 6 | -6.931635000 | 6.517964000  | 1.963323000  |
| 1 | -9.493039000  | 3.255224000  | 2.387686000  | 1 | -6.570247000 | 7.129838000  | 2.792448000  |
| 6 | -8.206015000  | 1.968837000  | 1.239045000  | 6 | -6.127928000 | 5.504254000  | 1.456600000  |
| 1 | -7.303451000  | 2.280220000  | 1.766922000  | 1 | -5.146789000 | 5.319907000  | 1.896320000  |
| 6 | -5.568014000  | 3.769617000  | -0.324806000 | 6 | -3.081980000 | 5.997018000  | -0.240750000 |
| 6 | -6.923031000  | 4.126522000  | -0.814178000 | 6 | -4.146755000 | 6.935540000  | -0.670238000 |

|   |              |             |              |   |              |              |              |
|---|--------------|-------------|--------------|---|--------------|--------------|--------------|
| 6 | -7.541569000 | 3.404194000 | -1.840988000 | 6 | -5.050044000 | 6.601539000  | -1.686310000 |
| 1 | -7.028797000 | 2.542231000 | -2.270228000 | 1 | -4.989444000 | 5.617022000  | -2.152671000 |
| 6 | -8.788860000 | 3.783949000 | -2.326827000 | 6 | -6.005246000 | 7.515623000  | -2.119057000 |
| 1 | -9.253532000 | 3.208651000 | -3.130334000 | 1 | -6.696326000 | 7.237684000  | -2.917635000 |
| 6 | -9.440719000 | 4.892982000 | -1.795719000 | 6 | -6.079924000 | 8.779338000  | -1.540084000 |
| 6 | -8.832698000 | 5.626680000 | -0.778982000 | 6 | -5.183804000 | 9.127838000  | -0.531607000 |
| 1 | -9.334966000 | 6.500700000 | -0.358461000 | 1 | -5.232310000 | 10.118348000 | -0.073918000 |
| 6 | -7.583097000 | 5.252722000 | -0.300588000 | 6 | -4.221115000 | 8.219469000  | -0.109310000 |
| 1 | -7.106544000 | 5.838064000 | 0.487920000  | 1 | -3.513094000 | 8.502852000  | 0.671564000  |
| 6 | -4.629947000 | 4.910053000 | -0.125063000 | 6 | -1.727724000 | 6.589994000  | -0.066951000 |
| 6 | -3.916232000 | 5.062473000 | 1.067749000  | 6 | -0.974158000 | 6.358687000  | 1.088602000  |
| 1 | -4.055551000 | 4.336339000 | 1.870802000  | 1 | -1.389072000 | 5.734348000  | 1.881743000  |
| 6 | -3.039132000 | 6.129833000 | 1.239508000  | 6 | 0.291005000  | 6.919580000  | 1.235707000  |
| 1 | -2.481007000 | 6.227897000 | 2.172399000  | 1 | 0.869776000  | 6.720759000  | 2.139567000  |
| 6 | -2.864413000 | 7.061613000 | 0.221959000  | 6 | 0.822389000  | 7.720060000  | 0.229620000  |
| 6 | -3.579042000 | 6.927881000 | -0.967270000 | 6 | 0.078269000  | 7.966458000  | -0.922581000 |
| 1 | -3.445861000 | 7.655214000 | -1.771085000 | 1 | 0.489740000  | 8.592511000  | -1.717293000 |
| 6 | -4.459445000 | 5.866856000 | -1.135848000 | 6 | -1.188053000 | 7.413490000  | -1.065699000 |
| 1 | -5.019579000 | 5.765822000 | -2.067512000 | 1 | -1.769605000 | 7.610434000  | -1.968377000 |
| 6 | -2.452604000 | 2.431237000 | 0.128007000  | 6 | -0.948483000 | 3.371256000  | 0.122162000  |
| 6 | -1.274527000 | 2.744256000 | 0.222956000  | 6 | 0.267834000  | 3.052896000  | 0.223138000  |
| 6 | 0.056079000  | 3.027171000 | 0.287935000  | 6 | 1.525654000  | 2.663002000  | 0.289120000  |
| 6 | 1.264656000  | 3.213306000 | 0.298037000  | 6 | 2.699394000  | 2.232606000  | 0.303441000  |
| 6 | 2.658036000  | 3.258344000 | 0.200547000  | 6 | 3.905330000  | 1.604763000  | 0.214296000  |
| 6 | 3.547136000  | 2.246001000 | -0.125443000 | 6 | 4.207163000  | 0.245812000  | -0.076845000 |
| 6 | 4.710147000  | 3.172523000 | -0.112801000 | 6 | 5.647492000  | 0.503867000  | -0.107391000 |
| 6 | 3.735820000  | 4.283799000 | 0.227910000  | 6 | 5.353482000  | 1.959505000  | 0.185967000  |
| 6 | 3.703366000  | 5.625008000 | 0.401168000  | 6 | 5.983782000  | 3.154165000  | 0.279308000  |
| 6 | 2.489058000  | 6.271137000 | 0.975298000  | 6 | 5.249196000  | 4.337077000  | 0.811652000  |
| 6 | 1.912194000  | 5.785902000 | 2.154961000  | 6 | 4.558847000  | 4.260674000  | 2.027069000  |
| 1 | 2.337357000  | 4.901460000 | 2.632797000  | 1 | 4.529983000  | 3.311814000  | 2.565590000  |
| 6 | 0.829392000  | 6.436242000 | 2.740505000  | 6 | 3.938191000  | 5.383565000  | 2.567100000  |
| 1 | 0.402951000  | 6.048133000 | 3.668043000  | 1 | 3.416475000  | 5.305416000  | 3.523449000  |
| 6 | 0.304272000  | 7.583866000 | 2.154929000  | 6 | 3.995160000  | 6.602394000  | 1.898212000  |
| 6 | 0.862500000  | 8.072613000 | 0.974425000  | 6 | 4.670087000  | 6.690376000  | 0.681587000  |
| 1 | 0.454899000  | 8.971622000 | 0.506488000  | 1 | 4.716277000  | 7.642320000  | 0.147838000  |

|   |              |              |              |   |              |              |              |
|---|--------------|--------------|--------------|---|--------------|--------------|--------------|
| 6 | 1.946755000  | 7.426323000  | 0.393993000  | 6 | 5.296278000  | 5.570825000  | 0.147369000  |
| 1 | 2.389551000  | 7.822683000  | -0.521610000 | 1 | 5.836969000  | 5.649095000  | -0.797712000 |
| 6 | 4.812994000  | 6.540649000  | 0.038077000  | 6 | 7.386749000  | 3.396216000  | -0.137083000 |
| 6 | 5.127054000  | 7.639681000  | 0.851694000  | 6 | 8.213171000  | 4.253733000  | 0.604766000  |
| 1 | 4.572655000  | 7.795580000  | 1.778812000  | 1 | 7.826523000  | 4.714672000  | 1.515376000  |
| 6 | 6.136882000  | 8.524792000  | 0.495398000  | 6 | 9.515796000  | 4.516007000  | 0.199030000  |
| 1 | 6.372844000  | 9.368791000  | 1.147351000  | 1 | 10.146469000 | 5.178397000  | 0.796152000  |
| 6 | 6.844059000  | 8.339045000  | -0.690848000 | 6 | 10.015295000 | 3.939325000  | -0.966986000 |
| 6 | 6.532927000  | 7.261462000  | -1.514895000 | 6 | 9.201213000  | 3.099385000  | -1.721391000 |
| 1 | 7.076559000  | 7.112340000  | -2.450075000 | 1 | 9.581150000  | 2.649776000  | -2.641122000 |
| 6 | 5.526142000  | 6.371532000  | -1.154583000 | 6 | 7.899341000  | 2.831248000  | -1.311010000 |
| 1 | 5.275584000  | 5.536497000  | -1.810610000 | 1 | 7.260416000  | 2.183659000  | -1.913364000 |
| 6 | 6.035431000  | 2.944594000  | -0.260190000 | 6 | 6.710345000  | -0.346221000 | -0.246505000 |
| 6 | 7.105360000  | 3.894082000  | 0.131037000  | 6 | 8.097661000  | -0.018747000 | 0.147646000  |
| 6 | 7.024917000  | 4.622876000  | 1.323561000  | 6 | 8.367187000  | 0.721103000  | 1.306848000  |
| 1 | 6.145055000  | 4.508882000  | 1.958583000  | 1 | 7.535372000  | 1.081139000  | 1.914018000  |
| 6 | 8.057051000  | 5.471534000  | 1.710477000  | 6 | 9.675775000  | 0.983016000  | 1.697513000  |
| 1 | 7.975496000  | 6.030118000  | 2.645185000  | 1 | 9.863042000  | 1.559292000  | 2.605928000  |
| 6 | 9.190179000  | 5.606186000  | 0.913503000  | 6 | 10.742887000 | 0.510935000  | 0.938112000  |
| 6 | 9.287600000  | 4.880902000  | -0.272308000 | 6 | 10.491543000 | -0.231735000 | -0.213894000 |
| 1 | 10.174142000 | 4.978401000  | -0.902850000 | 1 | 11.322168000 | -0.606819000 | -0.815907000 |
| 6 | 8.259943000  | 4.027699000  | -0.654758000 | 6 | 9.184476000  | -0.500016000 | -0.600165000 |
| 1 | 8.346449000  | 3.455864000  | -1.580365000 | 1 | 8.995853000  | -1.086375000 | -1.500989000 |
| 6 | 6.492254000  | 1.642692000  | -0.824772000 | 6 | 6.476624000  | -1.713680000 | -0.781870000 |
| 6 | 5.957546000  | 1.157929000  | -2.023880000 | 6 | 5.725643000  | -1.909987000 | -1.947940000 |
| 1 | 5.186858000  | 1.736087000  | -2.536971000 | 1 | 5.302408000  | -1.045416000 | -2.462284000 |
| 6 | 6.410098000  | -0.037060000 | -2.575943000 | 6 | 5.530445000  | -3.186669000 | -2.465899000 |
| 1 | 5.981347000  | -0.397443000 | -3.513282000 | 1 | 4.942869000  | -3.317150000 | -3.376946000 |
| 6 | 7.407331000  | -0.766608000 | -1.937677000 | 6 | 6.083543000  | -4.291736000 | -1.827030000 |
| 6 | 7.951782000  | -0.293387000 | -0.744600000 | 6 | 6.837995000  | -4.111649000 | -0.668515000 |
| 1 | 8.736566000  | -0.859594000 | -0.237572000 | 1 | 7.277492000  | -4.973576000 | -0.161170000 |
| 6 | 7.503716000  | 0.902306000  | -0.196789000 | 6 | 7.037469000  | -2.836622000 | -0.154472000 |
| 1 | 7.939909000  | 1.273213000  | 0.732745000  | 1 | 7.632648000  | -2.701803000 | 0.750554000  |
| 6 | 3.327979000  | 0.872362000  | -0.255663000 | 6 | 3.350862000  | -0.853418000 | -0.157005000 |
| 6 | 3.014315000  | -0.308999000 | -0.283799000 | 6 | 2.499061000  | -1.730280000 | -0.165674000 |
| 6 | 2.592912000  | -1.603620000 | -0.259173000 | 6 | 1.496735000  | -2.659195000 | -0.140205000 |

|   |               |               |              |   |              |               |              |
|---|---------------|---------------|--------------|---|--------------|---------------|--------------|
| 6 | 2.151027000   | -2.741499000  | -0.190998000 | 6 | 0.559978000  | -3.439065000  | -0.088319000 |
| 6 | 4.306551000   | -5.312019000  | -0.272059000 | 6 | 1.227299000  | -6.704482000  | 0.003307000  |
| 6 | 5.224417000   | -5.469788000  | -1.320167000 | 6 | 2.045461000  | -7.298603000  | -0.968644000 |
| 6 | 4.649389000   | -4.473135000  | 0.794416000  | 6 | 1.837776000  | -6.086901000  | 1.101123000  |
| 6 | 6.442196000   | -4.800870000  | -1.304485000 | 6 | 3.429320000  | -7.261329000  | -0.851472000 |
| 1 | 4.975357000   | -6.128085000  | -2.154704000 | 1 | 1.584518000  | -7.792637000  | -1.826130000 |
| 6 | 5.871128000   | -3.806257000  | 0.813052000  | 6 | 3.224175000  | -6.054004000  | 1.221748000  |
| 1 | 3.954182000   | -4.357479000  | 1.627870000  | 1 | 1.214026000  | -5.640360000  | 1.877550000  |
| 6 | 6.771220000   | -3.970022000  | -0.234648000 | 6 | 4.023583000  | -6.640336000  | 0.246254000  |
| 1 | 7.143008000   | -4.932595000  | -2.132035000 | 1 | 4.050381000  | -7.723574000  | -1.622221000 |
| 1 | 6.121665000   | -3.157260000  | 1.654633000  | 1 | 3.681396000  | -5.567862000  | 2.085964000  |
| 1 | 7.633662000   | 9.037879000   | -0.975307000 | 1 | 11.036952000 | 4.149844000   | -1.290490000 |
| 1 | 10.000486000  | 6.271668000   | 1.219003000  | 1 | 11.770128000 | 0.717084000   | 1.246354000  |
| 1 | 7.761193000   | -1.704336000  | -2.370326000 | 1 | 5.927014000  | -5.293648000  | -2.231519000 |
| 1 | 7.731241000   | -3.451078000  | -0.216415000 | 1 | 5.110592000  | -6.614231000  | 0.341605000  |
| 1 | 3.437805000   | -11.308507000 | -1.428155000 | 1 | -2.268572000 | -11.613749000 | -1.326222000 |
| 1 | 1.182035000   | -11.518011000 | 2.412961000  | 1 | -4.676041000 | -10.648792000 | 2.267138000  |
| 1 | -5.737163000  | -5.895269000  | 0.778428000  | 1 | -7.943680000 | -2.436795000  | 0.250208000  |
| 1 | -7.106438000  | -4.848793000  | -1.314091000 | 1 | -8.421818000 | -0.736581000  | -1.865041000 |
| 1 | -11.562996000 | 2.529712000   | 1.211571000  | 1 | -8.823166000 | 7.550221000   | 1.819505000  |
| 1 | -10.419564000 | 5.190150000   | -2.178281000 | 1 | -6.831687000 | 9.495293000   | -1.879187000 |
| 1 | -2.166597000  | 7.890339000   | 0.352847000  | 1 | 1.819834000  | 8.148975000   | 0.340560000  |
| 1 | -0.536090000  | 8.103451000   | 2.621005000  | 1 | 3.520110000  | 7.487293000   | 2.327954000  |

**3a**

**Cam-b3lyp/def2-SVP**

**-2 1**

|   |              |              |              |
|---|--------------|--------------|--------------|
| 6 | -0.557939000 | 4.247077000  | -0.183494000 |
| 6 | 0.829310000  | 4.178648000  | -0.042275000 |
| 6 | 0.946679000  | 5.651637000  | 0.058989000  |
| 6 | -0.529018000 | 5.726809000  | -0.263343000 |
| 6 | -1.441457000 | 6.648797000  | -0.667668000 |
| 6 | -1.089054000 | 8.034621000  | -1.065338000 |
| 6 | -1.947948000 | 9.105609000  | -0.768187000 |
| 1 | -2.865056000 | 8.909109000  | -0.209678000 |
| 6 | -1.647590000 | 10.402625000 | -1.165560000 |

**3a**

**Cam-b3lyp/def2-SVP**

**-2 3**

|   |              |              |              |
|---|--------------|--------------|--------------|
| 6 | -2.616577000 | -3.322619000 | -0.130007000 |
| 6 | -3.588380000 | -2.274323000 | 0.003653000  |
| 6 | -4.684975000 | -3.247633000 | 0.084128000  |
| 6 | -3.688265000 | -4.330810000 | -0.248971000 |
| 6 | -3.760766000 | -5.606760000 | -0.717696000 |
| 6 | -5.033717000 | -6.182055000 | -1.229808000 |
| 6 | -5.432429000 | -7.487762000 | -0.907205000 |
| 1 | -4.820352000 | -8.071596000 | -0.216812000 |
| 6 | -6.588035000 | -8.042499000 | -1.445346000 |

|   |              |              |              |   |              |              |              |
|---|--------------|--------------|--------------|---|--------------|--------------|--------------|
| 1 | -2.329727000 | 11.217960000 | -0.910880000 | 1 | -6.881002000 | -9.058026000 | -1.166494000 |
| 6 | -0.481062000 | 10.665693000 | -1.881646000 | 6 | -7.373849000 | -7.308040000 | -2.331742000 |
| 6 | 0.374937000  | 9.614150000  | -2.195889000 | 6 | -6.989987000 | -6.013106000 | -2.668548000 |
| 1 | 1.290421000  | 9.803571000  | -2.761522000 | 1 | -7.592422000 | -5.426496000 | -3.366883000 |
| 6 | 0.072166000  | 8.315393000  | -1.798324000 | 6 | -5.834312000 | -5.459057000 | -2.125454000 |
| 1 | 0.742365000  | 7.496156000  | -2.061292000 | 1 | -5.530090000 | -4.449255000 | -2.404719000 |
| 6 | 1.954415000  | 6.458659000  | 0.481926000  | 6 | -5.979091000 | -3.220257000 | 0.519017000  |
| 6 | 1.775176000  | 7.865555000  | 0.914843000  | 6 | -6.666558000 | -4.447468000 | 0.999705000  |
| 6 | 0.643961000  | 8.277475000  | 1.633243000  | 6 | -6.028415000 | -5.324746000 | 1.889025000  |
| 1 | -0.135770000 | 7.548021000  | 1.855492000  | 1 | -5.001291000 | -5.112770000 | 2.189598000  |
| 6 | 0.509125000  | 9.591610000  | 2.070071000  | 6 | -6.686640000 | -6.438715000 | 2.401904000  |
| 1 | -0.385953000 | 9.884466000  | 2.624176000  | 1 | -6.163645000 | -7.101333000 | 3.096360000  |
| 6 | 1.506334000  | 10.527551000 | 1.810598000  | 6 | -8.004945000 | -6.704251000 | 2.041974000  |
| 6 | 2.644134000  | 10.132314000 | 1.109372000  | 6 | -8.656665000 | -5.841271000 | 1.162470000  |
| 1 | 3.436505000  | 10.855272000 | 0.898483000  | 1 | -9.689838000 | -6.040167000 | 0.865729000  |
| 6 | 2.777435000  | 8.819789000  | 0.673238000  | 6 | -7.997500000 | -4.728065000 | 0.653758000  |
| 1 | 3.674282000  | 8.518171000  | 0.128961000  | 1 | -8.517346000 | -4.055531000 | -0.031542000 |
| 6 | 3.324399000  | 5.890821000  | 0.635950000  | 6 | -6.704214000 | -1.937747000 | 0.680125000  |
| 6 | 4.035151000  | 6.053424000  | 1.835350000  | 6 | -7.574708000 | -1.723543000 | 1.763943000  |
| 1 | 3.576073000  | 6.613074000  | 2.653141000  | 1 | -7.715801000 | -2.519178000 | 2.497624000  |
| 6 | 5.295191000  | 5.491949000  | 2.003122000  | 6 | -8.237935000 | -0.513382000 | 1.929401000  |
| 1 | 5.818888000  | 5.611025000  | 2.955049000  | 1 | -8.895480000 | -0.372015000 | 2.791434000  |
| 6 | 5.880296000  | 4.758944000  | 0.971561000  | 6 | -8.052851000 | 0.522186000  | 1.015267000  |
| 6 | 5.197480000  | 4.608030000  | -0.230407000 | 6 | -7.203908000 | 0.324586000  | -0.070031000 |
| 1 | 5.642218000  | 4.022692000  | -1.037048000 | 1 | -7.038755000 | 1.130430000  | -0.787794000 |
| 6 | 3.936302000  | 5.173044000  | -0.397943000 | 6 | -6.547082000 | -0.889415000 | -0.239665000 |
| 1 | 3.404381000  | 5.043840000  | -1.341876000 | 1 | -5.892579000 | -1.031954000 | -1.099763000 |
| 6 | 1.680632000  | 3.077339000  | 0.011440000  | 6 | -3.415283000 | -0.904977000 | 0.061137000  |
| 6 | 2.322253000  | 2.029515000  | 0.001876000  | 6 | -3.112221000 | 0.291455000  | 0.059888000  |
| 6 | 2.976833000  | 0.843864000  | -0.016683000 | 6 | -2.702796000 | 1.579649000  | 0.046384000  |
| 6 | 3.497975000  | -0.273890000 | -0.026198000 | 6 | -2.254037000 | 2.728953000  | 0.026741000  |
| 6 | 3.921819000  | -1.587033000 | -0.035692000 | 6 | -1.592828000 | 3.942038000  | -0.011462000 |
| 6 | 3.107744000  | -2.810281000 | -0.027350000 | 6 | -0.184560000 | 4.229502000  | -0.030362000 |
| 6 | 4.375760000  | -3.603029000 | -0.086657000 | 6 | -0.461637000 | 5.676201000  | -0.141226000 |
| 6 | 5.157159000  | -2.323984000 | 0.072414000  | 6 | -1.928786000 | 5.365411000  | 0.036398000  |
| 6 | 6.484778000  | -2.034096000 | 0.326939000  | 6 | -3.057913000 | 6.087199000  | 0.313290000  |

|   |              |              |              |   |              |              |              |
|---|--------------|--------------|--------------|---|--------------|--------------|--------------|
| 6 | 7.028436000  | -0.686587000 | 0.078065000  | 6 | -4.400288000 | 5.472660000  | 0.188919000  |
| 6 | 6.569911000  | 0.097091000  | -0.999158000 | 6 | -4.701042000 | 4.601480000  | -0.870955000 |
| 1 | 5.783251000  | -0.299616000 | -1.641826000 | 1 | -3.924293000 | 4.367848000  | -1.599896000 |
| 6 | 7.108461000  | 1.348251000  | -1.271764000 | 6 | -5.967403000 | 4.045220000  | -1.012540000 |
| 1 | 6.730220000  | 1.917134000  | -2.125383000 | 1 | -6.166157000 | 3.372069000  | -1.850116000 |
| 6 | 8.127520000  | 1.873515000  | -0.477991000 | 6 | -6.976433000 | 4.343678000  | -0.100084000 |
| 6 | 8.590037000  | 1.121013000  | 0.600960000  | 6 | -6.697776000 | 5.204447000  | 0.960214000  |
| 1 | 9.379436000  | 1.517790000  | 1.245824000  | 1 | -7.474740000 | 5.439841000  | 1.692468000  |
| 6 | 8.051904000  | -0.131175000 | 0.873225000  | 6 | -5.431780000 | 5.760802000  | 1.100614000  |
| 1 | 8.425138000  | -0.698193000 | 1.727566000  | 1 | -5.227357000 | 6.428550000  | 1.939448000  |
| 6 | 7.362821000  | -3.038574000 | 0.967092000  | 6 | -2.986742000 | 7.466378000  | 0.856265000  |
| 6 | 8.712790000  | -3.197852000 | 0.602815000  | 6 | -3.873027000 | 8.473605000  | 0.440647000  |
| 1 | 9.112711000  | -2.592264000 | -0.212641000 | 1 | -4.597508000 | 8.248342000  | -0.344375000 |
| 6 | 9.538742000  | -4.110309000 | 1.247991000  | 6 | -3.839118000 | 9.744156000  | 1.003209000  |
| 1 | 10.580180000 | -4.212072000 | 0.930143000  | 1 | -4.535169000 | 10.509716000 | 0.650146000  |
| 6 | 9.046181000  | -4.902535000 | 2.284520000  | 6 | -2.919797000 | 10.046745000 | 2.006489000  |
| 6 | 7.712932000  | -4.762644000 | 2.662182000  | 6 | -2.035660000 | 9.060436000  | 2.435341000  |
| 1 | 7.308614000  | -5.366932000 | 3.478974000  | 1 | -1.313194000 | 9.278105000  | 3.226309000  |
| 6 | 6.889769000  | -3.843731000 | 2.019262000  | 6 | -2.071303000 | 7.789315000  | 1.870427000  |
| 1 | 5.855503000  | -3.723081000 | 2.345327000  | 1 | -1.389124000 | 7.016142000  | 2.226869000  |
| 6 | 4.667872000  | -4.866519000 | -0.477967000 | 6 | 0.263340000  | 6.765646000  | -0.514434000 |
| 6 | 6.023638000  | -5.252097000 | -0.965376000 | 6 | -0.379726000 | 7.995461000  | -1.051605000 |
| 6 | 6.638037000  | -4.526318000 | -1.993381000 | 6 | -1.351813000 | 7.911865000  | -2.058150000 |
| 1 | 6.136364000  | -3.639784000 | -2.384009000 | 1 | -1.665091000 | 6.926214000  | -2.405334000 |
| 6 | 7.862926000  | -4.926433000 | -2.519883000 | 6 | -1.903828000 | 9.057683000  | -2.623833000 |
| 1 | 8.320716000  | -4.344627000 | -3.323838000 | 1 | -2.657711000 | 8.961763000  | -3.409416000 |
| 6 | 8.501527000  | -6.060945000 | -2.026768000 | 6 | -1.495198000 | 10.318349000 | -2.198029000 |
| 6 | 7.903569000  | -6.791679000 | -1.002455000 | 6 | -0.527452000 | 10.419991000 | -1.200213000 |
| 1 | 8.399526000  | -7.678743000 | -0.600485000 | 1 | -0.201831000 | 11.403544000 | -0.851689000 |
| 6 | 6.675709000  | -6.394161000 | -0.483965000 | 6 | 0.025231000  | 9.273752000  | -0.640252000 |
| 1 | 6.207686000  | -6.974647000 | 0.313593000  | 1 | 0.787409000  | 9.361594000  | 0.136698000  |
| 6 | 3.618169000  | -5.913106000 | -0.574131000 | 6 | 1.746485000  | 6.724396000  | -0.547036000 |
| 6 | 2.599760000  | -6.014552000 | 0.383094000  | 6 | 2.480819000  | 6.068820000  | 0.451990000  |
| 1 | 2.586006000  | -5.316028000 | 1.219688000  | 1 | 1.948614000  | 5.596046000  | 1.277679000  |
| 6 | 1.609378000  | -6.985566000 | 0.276699000  | 6 | 3.869350000  | 6.005752000  | 0.401349000  |
| 1 | 0.813915000  | -7.025875000 | 1.023028000  | 1 | 4.412349000  | 5.463494000  | 1.177839000  |

|   |              |              |              |   |              |              |              |
|---|--------------|--------------|--------------|---|--------------|--------------|--------------|
| 6 | 1.618831000  | -7.888852000 | -0.781837000 | 6 | 4.565210000  | 6.611512000  | -0.640708000 |
| 6 | 2.633237000  | -7.813120000 | -1.734048000 | 6 | 3.854366000  | 7.285594000  | -1.631779000 |
| 1 | 2.649857000  | -8.512275000 | -2.574226000 | 1 | 4.386256000  | 7.760761000  | -2.460378000 |
| 6 | 3.620921000  | -6.840778000 | -1.628966000 | 6 | 2.466398000  | 7.342187000  | -1.584365000 |
| 1 | 4.405487000  | -6.784027000 | -2.385539000 | 1 | 1.920712000  | 7.859732000  | -2.375383000 |
| 6 | 1.789811000  | -3.016343000 | -0.013228000 | 6 | 0.903401000  | 3.393094000  | -0.008780000 |
| 6 | 0.521867000  | -3.039786000 | 0.034204000  | 6 | 1.792119000  | 2.530720000  | 0.041444000  |
| 6 | -0.781531000 | -2.987712000 | 0.078361000  | 6 | 2.700480000  | 1.539777000  | 0.087449000  |
| 6 | -2.043456000 | -2.859487000 | 0.109965000  | 6 | 3.478857000  | 0.578500000  | 0.118874000  |
| 6 | -3.339585000 | -2.544322000 | 0.143880000  | 6 | 4.199024000  | -0.596719000 | 0.139233000  |
| 6 | -4.057910000 | -1.264429000 | 0.082861000  | 6 | 3.755777000  | -1.955569000 | 0.076878000  |
| 6 | -5.345282000 | -1.901789000 | 0.256352000  | 6 | 5.139741000  | -2.446661000 | 0.197412000  |
| 6 | -4.662374000 | -3.240684000 | 0.161789000  | 6 | 5.607401000  | -1.016313000 | 0.126281000  |
| 6 | -5.045765000 | -4.513131000 | -0.102004000 | 6 | 6.800171000  | -0.377300000 | -0.064032000 |
| 6 | -4.081197000 | -5.641018000 | -0.025119000 | 6 | 6.923240000  | 1.083462000  | 0.154665000  |
| 6 | -3.150701000 | -5.720715000 | 1.020195000  | 6 | 6.273856000  | 1.709915000  | 1.230736000  |
| 1 | -3.123574000 | -4.925997000 | 1.766222000  | 1 | 5.658128000  | 1.108029000  | 1.899960000  |
| 6 | -2.275604000 | -6.797030000 | 1.121709000  | 6 | 6.412872000  | 3.073716000  | 1.463401000  |
| 1 | -1.562694000 | -6.832396000 | 1.948795000  | 1 | 5.893693000  | 3.528491000  | 2.310595000  |
| 6 | -2.307483000 | -7.821979000 | 0.180176000  | 6 | 7.209354000  | 3.854764000  | 0.629670000  |
| 6 | -3.223916000 | -7.757232000 | -0.867593000 | 6 | 7.860242000  | 3.252288000  | -0.445572000 |
| 1 | -3.253041000 | -8.550025000 | -1.619498000 | 1 | 8.479354000  | 3.853317000  | -1.116855000 |
| 6 | -4.102144000 | -6.683917000 | -0.964857000 | 6 | 7.720644000  | 1.888969000  | -0.677544000 |
| 1 | -4.818040000 | -6.643622000 | -1.787888000 | 1 | 8.232315000  | 1.432028000  | -1.526471000 |
| 6 | -6.418478000 | -4.848731000 | -0.573595000 | 6 | 7.988613000  | -1.088165000 | -0.599383000 |
| 6 | -7.138041000 | -5.924369000 | -0.036610000 | 6 | 9.281213000  | -0.847172000 | -0.106769000 |
| 1 | -6.707433000 | -6.488922000 | 0.792672000  | 1 | 9.407352000  | -0.159496000 | 0.731731000  |
| 6 | -8.386411000 | -6.275329000 | -0.539044000 | 6 | 10.393245000 | -1.470210000 | -0.660943000 |
| 1 | -8.933868000 | -7.109878000 | -0.093699000 | 1 | 11.385693000 | -1.271127000 | -0.248009000 |
| 6 | -8.939958000 | -5.564875000 | -1.601974000 | 6 | 10.247163000 | -2.349727000 | -1.732593000 |
| 6 | -8.235012000 | -4.496960000 | -2.150395000 | 6 | 8.974026000  | -2.597500000 | -2.238257000 |
| 1 | -8.656382000 | -3.932241000 | -2.985831000 | 1 | 8.842421000  | -3.279002000 | -3.082689000 |
| 6 | -6.989071000 | -4.143183000 | -1.641053000 | 6 | 7.862045000  | -1.973685000 | -1.680807000 |
| 1 | -6.434928000 | -3.310624000 | -2.076873000 | 1 | 6.869693000  | -2.157728000 | -2.094975000 |
| 6 | -6.634418000 | -1.507392000 | 0.551997000  | 6 | 5.712950000  | -3.650840000 | 0.485792000  |
| 6 | -7.571626000 | -2.433419000 | 1.231742000  | 6 | 7.071152000  | -3.744714000 | 1.083816000  |

|   |               |              |              |   |              |              |              |
|---|---------------|--------------|--------------|---|--------------|--------------|--------------|
| 6 | -7.149286000  | -3.220541000 | 2.317027000  | 6 | 7.430588000  | -2.931680000 | 2.168565000  |
| 1 | -6.107557000  | -3.156214000 | 2.635330000  | 1 | 6.710960000  | -2.199000000 | 2.536670000  |
| 6 | -8.030661000  | -4.052533000 | 3.000525000  | 6 | 8.672037000  | -3.057996000 | 2.785155000  |
| 1 | -7.666097000  | -4.646525000 | 3.843097000  | 1 | 8.922163000  | -2.412199000 | 3.630813000  |
| 6 | -9.370961000  | -4.118796000 | 2.628163000  | 6 | 9.587592000  | -4.004694000 | 2.334584000  |
| 6 | -9.813071000  | -3.342097000 | 1.557946000  | 6 | 9.246275000  | -4.823859000 | 1.259598000  |
| 1 | -10.860072000 | -3.387292000 | 1.245655000  | 1 | 9.957903000  | -5.566959000 | 0.890362000  |
| 6 | -8.929102000  | -2.515687000 | 0.874210000  | 6 | 8.004494000  | -4.697567000 | 0.647798000  |
| 1 | -9.288584000  | -1.916596000 | 0.035211000  | 1 | 7.744353000  | -5.345923000 | -0.191326000 |
| 6 | -7.071735000  | -0.114351000 | 0.348886000  | 6 | 4.953499000  | -4.916347000 | 0.346510000  |
| 6 | -6.574978000  | 0.663242000  | -0.714540000 | 6 | 4.062571000  | -5.120468000 | -0.719159000 |
| 1 | -5.855637000  | 0.219465000  | -1.402900000 | 1 | 3.931763000  | -4.331536000 | -1.460123000 |
| 6 | -6.985833000  | 1.976091000  | -0.911712000 | 6 | 3.348438000  | -6.307188000 | -0.846696000 |
| 1 | -6.566209000  | 2.548425000  | -1.742493000 | 1 | 2.647281000  | -6.427512000 | -1.675463000 |
| 6 | -7.918650000  | 2.563626000  | -0.058889000 | 6 | 3.515896000  | -7.333319000 | 0.079881000  |
| 6 | -8.428526000  | 1.812075000  | 0.999300000  | 6 | 4.403104000  | -7.154417000 | 1.140054000  |
| 1 | -9.154094000  | 2.256734000  | 1.686504000  | 1 | 4.539214000  | -7.947417000 | 1.880308000  |
| 6 | -8.013056000  | 0.501546000  | 1.199558000  | 6 | 5.110283000  | -5.965222000 | 1.270431000  |
| 1 | -8.414426000  | -0.062530000 | 2.042944000  | 1 | 5.792704000  | -5.834580000 | 2.112034000  |
| 6 | -3.539486000  | 0.008744000  | -0.023416000 | 6 | 2.484530000  | -2.477793000 | 0.002913000  |
| 6 | -2.946160000  | 1.086367000  | -0.122401000 | 6 | 1.292118000  | -2.803187000 | -0.068223000 |
| 6 | -2.217752000  | 2.225684000  | -0.187122000 | 6 | -0.020885000 | -3.083530000 | -0.125371000 |
| 6 | -1.505523000  | 3.226951000  | -0.227192000 | 6 | -1.245214000 | -3.273486000 | -0.159235000 |
| 6 | -2.871661000  | 6.263242000  | -0.826855000 | 6 | -2.541975000 | -6.438576000 | -0.872113000 |
| 6 | -3.580539000  | 6.618461000  | -1.985921000 | 6 | -2.381858000 | -7.295899000 | -1.974908000 |
| 6 | -3.555018000  | 5.551512000  | 0.167283000  | 6 | -1.512042000 | -6.407118000 | 0.080193000  |
| 6 | -4.914263000  | 6.264856000  | -2.148372000 | 6 | -1.239434000 | -8.073202000 | -2.124280000 |
| 1 | -3.066882000  | 7.173045000  | -2.773813000 | 1 | -3.166101000 | -7.339538000 | -2.732750000 |
| 6 | -4.889773000  | 5.190117000  | 0.004027000  | 6 | -0.364786000 | -7.179184000 | -0.071143000 |
| 1 | -3.027807000  | 5.273813000  | 1.080878000  | 1 | -1.616192000 | -5.763351000 | 0.953770000  |
| 6 | -5.575460000  | 5.547249000  | -1.152687000 | 6 | -0.221914000 | -8.018246000 | -1.173129000 |
| 1 | -5.440586000  | 6.542605000  | -3.065216000 | 1 | -1.138128000 | -8.722068000 | -2.998380000 |
| 1 | -5.395434000  | 4.612079000  | 0.780267000  | 1 | 0.429857000  | -7.116251000 | 0.675334000  |
| 1 | -9.919259000  | -5.842477000 | -2.000148000 | 1 | 11.121595000 | -2.837560000 | -2.170625000 |
| 1 | -10.065813000 | -4.768206000 | 3.166812000  | 1 | 10.562694000 | -4.105200000 | 2.817887000  |
| 1 | -8.244634000  | 3.595145000  | -0.215327000 | 1 | 2.956191000  | -8.266372000 | -0.021926000 |

|   |              |              |              |   |              |              |              |
|---|--------------|--------------|--------------|---|--------------|--------------|--------------|
| 1 | -6.621501000 | 5.260068000  | -1.279824000 | 1 | 0.679623000  | -8.624486000 | -1.291859000 |
| 1 | -0.242440000 | 11.684954000 | -2.195033000 | 1 | -8.280860000 | -7.744469000 | -2.757655000 |
| 1 | 1.399701000  | 11.558792000 | 2.155957000  | 1 | -8.523446000 | -7.577969000 | 2.444877000  |
| 1 | 6.856773000  | 4.288968000  | 1.105866000  | 1 | -8.556729000 | 1.481664000  | 1.152746000  |
| 1 | 8.553881000  | 2.855770000  | -0.696897000 | 1 | -7.971547000 | 3.906351000  | -0.212487000 |
| 1 | 9.696036000  | -5.619584000 | 2.792657000  | 1 | -2.894596000 | 11.044830000 | 2.451124000  |
| 1 | 9.464792000  | -6.374196000 | -2.437455000 | 1 | -1.927960000 | 11.218812000 | -2.641232000 |
| 1 | 0.832734000  | -8.642364000 | -0.869242000 | 1 | 5.654704000  | 6.546801000  | -0.685347000 |
| 1 | -1.620238000 | -8.667612000 | 0.261654000  | 1 | 7.320255000  | 4.925975000  | 0.814970000  |

**3b**

**Cam-b3lyp/def2-SVP**

**0 1**

|   |              |              |              |
|---|--------------|--------------|--------------|
| 6 | -1.402808000 | 4.012835000  | -0.016433000 |
| 6 | -0.045624000 | 4.217871000  | 0.176903000  |
| 6 | -0.228990000 | 5.687447000  | 0.339818000  |
| 6 | -1.690431000 | 5.472618000  | 0.006324000  |
| 6 | -2.794198000 | 6.189535000  | -0.308627000 |
| 6 | -2.765094000 | 7.638019000  | -0.626047000 |
| 6 | -3.807011000 | 8.486002000  | -0.227767000 |
| 1 | -4.640295000 | 8.079019000  | 0.347516000  |
| 6 | -3.790399000 | 9.839050000  | -0.543085000 |
| 1 | -4.612638000 | 10.477570000 | -0.209545000 |
| 6 | -2.742472000 | 10.397777000 | -1.279501000 |
| 6 | -1.715670000 | 9.546641000  | -1.698273000 |
| 1 | -0.890316000 | 9.951346000  | -2.289820000 |
| 6 | -1.724544000 | 8.195047000  | -1.380094000 |
| 1 | -0.916038000 | 7.551346000  | -1.729844000 |
| 6 | 0.572242000  | 6.645680000  | 0.857543000  |
| 6 | 0.097353000  | 7.982138000  | 1.298033000  |
| 6 | -1.076283000 | 8.139177000  | 2.043282000  |
| 1 | -1.675537000 | 7.260758000  | 2.287321000  |
| 6 | -1.477488000 | 9.393173000  | 2.487102000  |
| 1 | -2.397324000 | 9.484642000  | 3.070560000  |
| 6 | -0.728705000 | 10.538102000 | 2.202110000  |
| 6 | 0.452615000  | 10.378424000 | 1.472348000  |

**3b**

**Cam-b3lyp/def2-SVP**

**0 3**

|   |              |              |              |
|---|--------------|--------------|--------------|
| 6 | 0.016144000  | 4.268943000  | 0.127622000  |
| 6 | 1.377827000  | 3.986917000  | 0.068790000  |
| 6 | 1.747716000  | 5.417977000  | 0.190112000  |
| 6 | 0.265158000  | 5.734085000  | 0.203631000  |
| 6 | -0.569969000 | 6.800228000  | 0.173767000  |
| 6 | -0.125311000 | 8.185977000  | -0.109617000 |
| 6 | -0.690533000 | 9.276022000  | 0.564619000  |
| 1 | -1.452081000 | 9.099740000  | 1.326314000  |
| 6 | -0.288113000 | 10.577027000 | 0.287082000  |
| 1 | -0.738824000 | 11.407022000 | 0.837445000  |
| 6 | 0.680535000  | 10.842906000 | -0.683938000 |
| 6 | 1.226322000  | 9.756221000  | -1.374061000 |
| 1 | 1.976773000  | 9.933906000  | -2.148698000 |
| 6 | 0.833321000  | 8.454436000  | -1.094957000 |
| 1 | 1.267991000  | 7.625102000  | -1.654968000 |
| 6 | 2.953978000  | 6.009795000  | 0.366849000  |
| 6 | 3.152838000  | 7.397100000  | 0.846756000  |
| 6 | 2.355197000  | 7.942327000  | 1.861025000  |
| 1 | 1.557268000  | 7.337577000  | 2.294334000  |
| 6 | 2.576694000  | 9.230176000  | 2.329038000  |
| 1 | 1.938588000  | 9.627821000  | 3.122461000  |
| 6 | 3.599789000  | 10.027118000 | 1.805861000  |
| 6 | 4.405153000  | 9.478310000  | 0.804968000  |

|   |              |              |              |   |             |              |              |
|---|--------------|--------------|--------------|---|-------------|--------------|--------------|
| 1 | 1.066241000  | 11.254072000 | 1.244866000  | 1 | 5.218667000 | 10.074190000 | 0.383028000  |
| 6 | 0.864314000  | 9.124868000  | 1.037480000  | 6 | 4.194016000 | 8.185465000  | 0.340226000  |
| 1 | 1.798153000  | 9.026819000  | 0.480537000  | 1 | 4.844477000 | 7.779326000  | -0.436498000 |
| 6 | 2.010593000  | 6.359876000  | 1.119083000  | 6 | 4.191201000 | 5.216467000  | 0.119047000  |
| 6 | 2.553488000  | 6.637764000  | 2.381157000  | 6 | 5.203115000 | 5.144443000  | 1.083534000  |
| 1 | 1.915314000  | 7.069191000  | 3.154704000  | 1 | 5.077771000 | 5.670444000  | 2.032146000  |
| 6 | 3.882238000  | 6.355787000  | 2.665292000  | 6 | 6.356983000 | 4.404658000  | 0.853409000  |
| 1 | 4.273655000  | 6.565292000  | 3.664179000  | 1 | 7.124789000 | 4.352958000  | 1.629554000  |
| 6 | 4.727362000  | 5.802443000  | 1.698582000  | 6 | 6.554222000 | 3.725590000  | -0.352284000 |
| 6 | 4.190109000  | 5.540601000  | 0.435851000  | 6 | 5.551540000 | 3.814369000  | -1.321901000 |
| 1 | 4.824306000  | 5.099885000  | -0.336680000 | 1 | 5.680403000 | 3.298557000  | -2.277082000 |
| 6 | 2.856798000  | 5.816491000  | 0.148066000  | 6 | 4.391165000 | 4.543561000  | -1.091985000 |
| 1 | 2.464759000  | 5.607503000  | -0.848876000 | 1 | 3.625509000 | 4.601969000  | -1.868108000 |
| 6 | 1.002394000  | 3.294672000  | 0.190937000  | 6 | 2.038864000 | 2.758337000  | 0.017808000  |
| 6 | 1.835616000  | 2.401673000  | 0.137669000  | 6 | 2.510025000 | 1.631005000  | -0.008497000 |
| 6 | 2.714607000  | 1.364795000  | 0.058825000  | 6 | 2.967846000 | 0.347710000  | -0.032411000 |
| 6 | 3.447616000  | 0.389586000  | -0.022361000 | 6 | 3.308258000 | -0.825029000 | -0.051813000 |
| 6 | 4.143302000  | -0.820190000 | -0.089367000 | 6 | 3.533861000 | -2.206229000 | -0.087532000 |
| 6 | 3.672915000  | -2.118139000 | 0.064768000  | 6 | 2.571698000 | -3.323694000 | -0.078847000 |
| 6 | 5.024929000  | -2.694797000 | -0.173313000 | 6 | 3.735813000 | -4.262639000 | -0.177988000 |
| 6 | 5.549095000  | -1.282304000 | -0.232356000 | 6 | 4.623606000 | -3.063088000 | -0.133190000 |
| 6 | 6.752776000  | -0.664319000 | -0.230569000 | 6 | 6.075396000 | -2.858000000 | -0.070784000 |
| 6 | 6.881743000  | 0.778618000  | -0.557200000 | 6 | 6.714526000 | -2.058179000 | -1.091016000 |
| 6 | 6.144520000  | 1.348822000  | -1.601372000 | 6 | 6.075794000 | -1.811783000 | -2.328926000 |
| 1 | 5.440058000  | 0.730255000  | -2.159577000 | 1 | 5.089656000 | -2.239650000 | -2.515783000 |
| 6 | 6.323287000  | 2.680219000  | -1.965741000 | 6 | 6.675804000 | -1.045348000 | -3.316651000 |
| 1 | 5.739808000  | 3.090433000  | -2.793851000 | 1 | 6.150215000 | -0.889528000 | -4.262150000 |
| 6 | 7.250833000  | 3.491238000  | -1.310385000 | 6 | 7.934808000 | -0.465751000 | -3.127913000 |
| 6 | 7.980779000  | 2.925095000  | -0.257318000 | 6 | 8.566014000 | -0.681730000 | -1.894066000 |
| 1 | 8.711171000  | 3.536871000  | 0.279132000  | 1 | 9.539295000 | -0.220957000 | -1.703610000 |
| 6 | 7.804856000  | 1.598829000  | 0.110567000  | 6 | 7.980299000 | -1.449792000 | -0.902547000 |
| 1 | 8.396556000  | 1.183446000  | 0.928066000  | 1 | 8.489665000 | -1.557027000 | 0.054455000  |
| 6 | 7.999155000  | -1.385689000 | 0.137448000  | 6 | 6.773777000 | -3.466581000 | 1.056615000  |
| 6 | 9.187448000  | -1.223455000 | -0.586682000 | 6 | 8.106139000 | -3.918515000 | 0.974503000  |
| 1 | 9.190825000  | -0.591349000 | -1.476679000 | 1 | 8.643513000 | -3.837765000 | 0.029858000  |
| 6 | 10.356758000 | -1.859295000 | -0.191770000 | 6 | 8.730999000 | -4.518334000 | 2.059156000  |

|   |              |              |              |   |              |              |              |
|---|--------------|--------------|--------------|---|--------------|--------------|--------------|
| 1 | 11.267275000 | -1.721481000 | -0.781215000 | 1 | 9.760920000  | -4.869313000 | 1.952957000  |
| 6 | 10.393432000 | -2.668454000 | 0.949122000  | 6 | 8.067829000  | -4.700149000 | 3.276793000  |
| 6 | 9.214175000  | -2.813056000 | 1.682077000  | 6 | 6.737222000  | -4.272449000 | 3.358620000  |
| 1 | 9.215700000  | -3.424296000 | 2.588358000  | 1 | 6.186068000  | -4.408319000 | 4.292957000  |
| 6 | 8.037661000  | -2.187392000 | 1.283566000  | 6 | 6.102032000  | -3.679981000 | 2.278713000  |
| 1 | 7.132370000  | -2.303883000 | 1.881807000  | 1 | 5.065388000  | -3.354424000 | 2.381364000  |
| 6 | 5.467249000  | -3.927181000 | -0.509012000 | 6 | 3.918018000  | -5.588562000 | -0.358326000 |
| 6 | 6.760995000  | -4.140489000 | -1.212822000 | 6 | 5.277252000  | -6.131289000 | -0.633316000 |
| 6 | 7.058144000  | -3.432763000 | -2.381580000 | 6 | 6.058645000  | -5.643403000 | -1.683192000 |
| 1 | 6.352790000  | -2.683022000 | -2.744356000 | 1 | 5.666474000  | -4.850170000 | -2.321564000 |
| 6 | 8.223406000  | -3.689225000 | -3.097100000 | 6 | 7.323354000  | -6.168978000 | -1.938114000 |
| 1 | 8.423596000  | -3.128885000 | -4.014150000 | 1 | 7.909285000  | -5.771623000 | -2.770847000 |
| 6 | 9.138311000  | -4.651682000 | -2.666828000 | 6 | 7.850763000  | -7.194655000 | -1.153378000 |
| 6 | 8.835805000  | -5.364426000 | -1.501441000 | 6 | 7.061090000  | -7.689590000 | -0.108324000 |
| 1 | 9.529339000  | -6.131470000 | -1.146316000 | 1 | 7.447079000  | -8.496422000 | 0.520473000  |
| 6 | 7.666094000  | -5.122931000 | -0.793221000 | 6 | 5.796736000  | -7.176313000 | 0.142808000  |
| 1 | 7.446055000  | -5.705324000 | 0.103773000  | 1 | 5.197843000  | -7.583751000 | 0.959944000  |
| 6 | 4.628829000  | -5.133955000 | -0.296979000 | 6 | 2.792560000  | -6.554099000 | -0.350683000 |
| 6 | 3.896340000  | -5.326427000 | 0.881808000  | 6 | 1.718849000  | -6.445133000 | 0.542687000  |
| 1 | 3.949136000  | -4.577266000 | 1.673538000  | 1 | 1.721236000  | -5.654359000 | 1.293163000  |
| 6 | 3.123940000  | -6.466608000 | 1.065338000  | 6 | 0.655458000  | -7.337494000 | 0.493551000  |
| 1 | 2.563094000  | -6.588940000 | 1.995340000  | 1 | -0.173923000 | -7.217451000 | 1.194333000  |
| 6 | 3.054653000  | -7.460580000 | 0.084187000  | 6 | 0.624645000  | -8.379343000 | -0.438834000 |
| 6 | 3.789056000  | -7.270835000 | -1.088684000 | 6 | 1.705472000  | -8.500786000 | -1.315234000 |
| 1 | 3.751796000  | -8.030150000 | -1.873940000 | 1 | 1.709742000  | -9.305702000 | -2.054708000 |
| 6 | 4.566975000  | -6.135351000 | -1.275188000 | 6 | 2.772464000  | -7.611966000 | -1.269719000 |
| 1 | 5.132312000  | -6.016205000 | -2.200941000 | 1 | 3.599984000  | -7.727870000 | -1.971814000 |
| 6 | 2.366142000  | -2.572440000 | 0.257948000  | 6 | 1.227065000  | -3.317388000 | 0.004766000  |
| 6 | 1.178742000  | -2.831530000 | 0.393870000  | 6 | -0.005532000 | -3.137974000 | 0.102315000  |
| 6 | -0.164812000 | -3.040334000 | 0.473772000  | 6 | -1.307822000 | -2.863684000 | 0.182094000  |
| 6 | -1.382170000 | -3.156617000 | 0.471339000  | 6 | -2.502609000 | -2.532280000 | 0.216487000  |
| 6 | -2.771187000 | -3.148927000 | 0.316719000  | 6 | -3.777051000 | -2.025236000 | 0.148168000  |
| 6 | -3.598004000 | -2.137557000 | -0.148145000 | 6 | -4.223602000 | -0.708565000 | -0.116889000 |
| 6 | -4.787623000 | -3.027361000 | -0.167309000 | 6 | -5.633904000 | -1.139338000 | -0.181163000 |
| 6 | -3.889629000 | -4.127594000 | 0.369801000  | 6 | -5.167421000 | -2.549064000 | 0.117094000  |
| 6 | -3.930662000 | -5.433691000 | 0.724547000  | 6 | -5.648218000 | -3.811415000 | 0.245677000  |

|   |               |              |              |   |               |              |              |
|---|---------------|--------------|--------------|---|---------------|--------------|--------------|
| 6 | -2.797077000  | -6.033366000 | 1.481905000  | 6 | -4.785526000  | -4.871782000 | 0.838499000  |
| 6 | -2.238155000  | -5.377888000 | 2.584775000  | 6 | -4.106023000  | -4.651117000 | 2.042460000  |
| 1 | -2.622715000  | -4.399386000 | 2.877392000  | 1 | -4.175956000  | -3.674059000 | 2.523821000  |
| 6 | -1.220327000  | -5.964110000 | 3.330106000  | 6 | -3.370456000  | -5.663488000 | 2.648128000  |
| 1 | -0.807588000  | -5.426083000 | 4.187257000  | 1 | -2.860972000  | -5.462101000 | 3.594010000  |
| 6 | -0.729312000  | -7.231355000 | 3.011867000  | 6 | -3.287891000  | -6.936642000 | 2.079521000  |
| 6 | -1.287997000  | -7.887642000 | 1.908771000  | 6 | -3.950932000  | -7.152119000 | 0.866420000  |
| 1 | -0.926215000  | -8.882424000 | 1.636020000  | 1 | -3.897731000  | -8.136003000 | 0.392674000  |
| 6 | -2.301532000  | -7.304819000 | 1.160005000  | 6 | -4.690743000  | -6.144340000 | 0.260016000  |
| 1 | -2.722393000  | -7.844302000 | 0.309588000  | 1 | -5.211255000  | -6.346595000 | -0.678023000 |
| 6 | -5.050410000  | -6.348185000 | 0.394746000  | 6 | -7.005054000  | -4.233055000 | -0.173774000 |
| 6 | -5.499488000  | -7.302376000 | 1.316336000  | 6 | -7.737035000  | -5.163018000 | 0.575875000  |
| 1 | -5.042497000  | -7.349040000 | 2.306485000  | 1 | -7.314365000  | -5.558517000 | 1.501106000  |
| 6 | -6.523697000  | -8.184401000 | 0.992269000  | 6 | -8.997365000  | -5.581259000 | 0.165353000  |
| 1 | -6.861064000  | -8.911600000 | 1.735416000  | 1 | -9.549880000  | -6.299580000 | 0.776626000  |
| 6 | -7.126782000  | -8.160473000 | -0.267667000 | 6 | -9.568886000  | -5.102630000 | -1.016113000 |
| 6 | -6.664416000  | -7.220544000 | -1.193845000 | 6 | -8.828438000  | -4.191216000 | -1.775514000 |
| 1 | -7.110853000  | -7.184114000 | -2.190884000 | 1 | -9.244853000  | -3.807754000 | -2.710563000 |
| 6 | -5.647749000  | -6.331905000 | -0.871930000 | 6 | -7.573405000  | -3.763687000 | -1.365270000 |
| 1 | -5.296694000  | -5.615344000 | -1.616193000 | 1 | -7.011448000  | -3.060465000 | -1.981850000 |
| 6 | -6.074897000  | -2.785321000 | -0.511520000 | 6 | -6.780464000  | -0.428338000 | -0.370220000 |
| 6 | -7.219399000  | -3.655361000 | -0.153354000 | 6 | -8.133817000  | -0.926095000 | -0.038254000 |
| 6 | -7.317268000  | -4.236271000 | 1.117596000  | 6 | -8.368219000  | -1.675275000 | 1.122743000  |
| 1 | -6.521176000  | -4.063895000 | 1.843607000  | 1 | -7.531153000  | -1.911446000 | 1.781507000  |
| 6 | -8.415235000  | -5.010240000 | 1.466571000  | 6 | -9.646541000  | -2.104220000 | 1.450900000  |
| 1 | -8.463796000  | -5.449866000 | 2.466131000  | 1 | -9.797621000  | -2.685621000 | 2.364090000  |
| 6 | -9.459628000  | -5.236754000 | 0.564616000  | 6 | -10.743726000 | -1.806755000 | 0.636277000  |
| 6 | -9.367373000  | -4.649265000 | -0.699433000 | 6 | -10.513314000 | -1.049421000 | -0.514879000 |
| 1 | -10.170878000 | -4.804978000 | -1.424015000 | 1 | -11.352488000 | -0.795963000 | -1.167911000 |
| 6 | -8.274035000  | -3.865930000 | -1.050587000 | 6 | -9.236506000  | -0.609340000 | -0.843001000 |
| 1 | -8.232732000  | -3.413186000 | -2.042863000 | 1 | -9.088089000  | -0.014812000 | -1.746099000 |
| 6 | -6.397527000  | -1.557438000 | -1.290556000 | 6 | -6.698018000  | 0.949861000  | -0.924350000 |
| 6 | -5.659777000  | -1.219177000 | -2.430535000 | 6 | -5.929766000  | 1.221974000  | -2.062725000 |
| 1 | -4.831824000  | -1.859208000 | -2.740749000 | 1 | -5.372155000  | 0.412496000  | -2.537129000 |
| 6 | -5.980136000  | -0.097390000 | -3.187110000 | 6 | -5.886857000  | 2.498107000  | -2.611877000 |
| 1 | -5.387282000  | 0.136721000  | -4.074875000 | 1 | -5.283151000  | 2.676355000  | -3.505331000 |

|   |               |              |              |   |               |              |              |
|---|---------------|--------------|--------------|---|---------------|--------------|--------------|
| 6 | -7.050334000  | 0.727705000  | -2.837725000 | 6 | -6.608171000  | 3.552498000  | -2.047888000 |
| 6 | -7.797374000  | 0.381267000  | -1.705985000 | 6 | -7.383495000  | 3.279051000  | -0.915816000 |
| 1 | -8.648834000  | 1.001359000  | -1.415693000 | 1 | -7.966434000  | 4.082591000  | -0.458884000 |
| 6 | -7.482441000  | -0.739038000 | -0.948525000 | 6 | -7.432833000  | 2.004641000  | -0.365862000 |
| 1 | -8.088142000  | -0.989214000 | -0.075346000 | 1 | -8.053981000  | 1.818621000  | 0.512439000  |
| 6 | -3.334700000  | -0.776591000 | -0.327240000 | 6 | -3.512183000  | 0.483336000  | -0.147884000 |
| 6 | -3.003221000  | 0.399991000  | -0.357508000 | 6 | -2.781380000  | 1.469045000  | -0.105618000 |
| 6 | -2.561207000  | 1.687725000  | -0.309888000 | 6 | -1.910848000  | 2.508719000  | -0.031269000 |
| 6 | -2.096588000  | 2.813741000  | -0.203008000 | 6 | -1.068837000  | 3.396124000  | 0.051571000  |
| 6 | -4.126762000  | 5.527833000  | -0.361622000 | 6 | -2.026519000  | 6.611043000  | 0.416777000  |
| 6 | -5.020145000  | 5.772706000  | -1.413264000 | 6 | -2.982989000  | 7.237783000  | -0.391744000 |
| 6 | -4.560321000  | 4.704949000  | 0.684101000  | 6 | -2.484945000  | 5.853591000  | 1.501920000  |
| 6 | -6.296428000  | 5.224583000  | -1.408913000 | 6 | -4.341011000  | 7.105390000  | -0.126351000 |
| 1 | -4.709430000  | 6.411398000  | -2.242300000 | 1 | -2.655169000  | 7.841633000  | -1.240034000 |
| 6 | -5.839754000  | 4.160131000  | 0.685723000  | 6 | -3.843393000  | 5.724390000  | 1.763626000  |
| 1 | -3.891122000  | 4.510754000  | 1.524189000  | 1 | -1.760981000  | 5.374484000  | 2.163285000  |
| 6 | -6.737331000  | 4.420794000  | -0.351503000 | 6 | -4.798110000  | 6.351297000  | 0.958766000  |
| 1 | -6.973728000  | 5.437334000  | -2.240419000 | 1 | -5.064756000  | 7.607762000  | -0.773391000 |
| 1 | -6.151963000  | 3.529430000  | 1.521853000  | 1 | -4.169078000  | 5.128747000  | 2.620299000  |
| 6 | -10.638879000 | -6.085689000 | 0.955506000  | 6 | -12.120220000 | -2.297092000 | 0.994735000  |
| 1 | -11.139465000 | -5.687315000 | 1.851756000  | 1 | -12.391847000 | -2.014302000 | 2.023370000  |
| 1 | -11.383811000 | -6.139033000 | 0.149440000  | 1 | -12.884104000 | -1.888868000 | 0.318446000  |
| 1 | -10.323704000 | -7.114053000 | 1.193663000  | 1 | -12.173428000 | -3.396375000 | 0.938671000  |
| 6 | -8.238696000  | -9.108087000 | -0.627699000 | 6 | -10.936331000 | -5.541669000 | -1.464578000 |
| 1 | -8.444309000  | -9.818198000 | 0.185321000  | 1 | -11.342945000 | -6.327613000 | -0.813047000 |
| 1 | -9.170134000  | -8.559859000 | -0.841321000 | 1 | -11.643676000 | -4.696790000 | -1.455671000 |
| 1 | -7.993481000  | -9.689213000 | -1.530156000 | 1 | -10.914964000 | -5.932019000 | -2.493705000 |
| 6 | -7.375195000  | 1.958940000  | -3.638721000 | 6 | -6.534770000  | 4.938814000  | -2.626697000 |
| 1 | -8.453518000  | 2.174987000  | -3.628270000 | 1 | -7.449347000  | 5.512664000  | -2.418158000 |
| 1 | -6.856336000  | 2.839171000  | -3.224925000 | 1 | -5.687873000  | 5.494998000  | -2.193131000 |
| 1 | -7.057367000  | 1.853587000  | -4.685739000 | 1 | -6.386854000  | 4.913273000  | -3.715881000 |
| 6 | -8.147386000  | 3.898229000  | -0.306287000 | 6 | -6.264576000  | 6.239139000  | 1.276007000  |
| 1 | -8.554813000  | 3.748193000  | -1.316015000 | 1 | -6.885426000  | 6.597978000  | 0.443188000  |
| 1 | -8.203754000  | 2.942465000  | 0.233045000  | 1 | -6.546890000  | 5.197681000  | 1.488539000  |
| 1 | -8.811894000  | 4.609189000  | 0.212019000  | 1 | -6.523526000  | 6.836807000  | 2.165046000  |
| 6 | -2.703064000  | 11.867687000 | -1.597813000 | 6 | 1.136389000   | 12.246292000 | -0.977891000 |

|                           |              |              |              |                           |              |              |              |
|---------------------------|--------------|--------------|--------------|---------------------------|--------------|--------------|--------------|
| 1                         | -2.390509000 | 12.047067000 | -2.637297000 | 1                         | 1.111100000  | 12.459494000 | -2.057382000 |
| 1                         | -3.684019000 | 12.340643000 | -1.449757000 | 1                         | 0.507778000  | 12.990888000 | -0.469924000 |
| 1                         | -1.980354000 | 12.389317000 | -0.948747000 | 1                         | 2.175395000  | 12.399511000 | -0.643639000 |
| 6                         | -1.195025000 | 11.896075000 | 2.652105000  | 6                         | 3.812739000  | 11.429507000 | 2.307917000  |
| 1                         | -1.589151000 | 11.867498000 | 3.678789000  | 1                         | 3.894681000  | 11.455066000 | 3.405340000  |
| 1                         | -0.382086000 | 12.634988000 | 2.618823000  | 1                         | 4.726159000  | 11.874696000 | 1.889556000  |
| 1                         | -2.007205000 | 12.265792000 | 2.004412000  | 1                         | 2.965752000  | 12.079019000 | 2.033438000  |
| 6                         | 6.173372000  | 5.520022000  | 2.004086000  | 6                         | 7.799004000  | 2.919435000  | -0.605914000 |
| 1                         | 6.511432000  | 4.593277000  | 1.519547000  | 1                         | 7.563406000  | 1.849796000  | -0.719771000 |
| 1                         | 6.821036000  | 6.336892000  | 1.643816000  | 1                         | 8.299422000  | 3.240887000  | -1.532963000 |
| 1                         | 6.342597000  | 5.423256000  | 3.085800000  | 1                         | 8.518822000  | 3.019966000  | 0.218272000  |
| 6                         | 7.490011000  | 4.915564000  | -1.733360000 | 6                         | 8.587547000  | 0.374228000  | -4.190268000 |
| 1                         | 6.727329000  | 5.259388000  | -2.445801000 | 1                         | 7.970088000  | 0.429316000  | -5.097308000 |
| 1                         | 7.481095000  | 5.597462000  | -0.869790000 | 1                         | 8.757033000  | 1.403506000  | -3.835342000 |
| 1                         | 8.472826000  | 5.023601000  | -2.219859000 | 1                         | 9.570719000  | -0.032802000 | -4.474680000 |
| 6                         | 10.420600000 | -4.898161000 | -3.414454000 | 6                         | 9.226212000  | -7.750793000 | -1.406240000 |
| 1                         | 11.242602000 | -4.298337000 | -2.989441000 | 1                         | 9.925350000  | -7.451548000 | -0.608568000 |
| 1                         | 10.725184000 | -5.953383000 | -3.358852000 | 1                         | 9.216893000  | -8.851028000 | -1.430688000 |
| 1                         | 10.329539000 | -4.623219000 | -4.474887000 | 1                         | 9.637231000  | -7.392987000 | -2.360421000 |
| 6                         | 11.656214000 | -3.378918000 | 1.354391000  | 6                         | 8.757126000  | -5.319431000 | 4.461374000  |
| 1                         | 12.549907000 | -2.784441000 | 1.115027000  | 1                         | 9.641490000  | -5.896996000 | 4.157349000  |
| 1                         | 11.668805000 | -3.598340000 | 2.431444000  | 1                         | 9.096482000  | -4.546324000 | 5.170614000  |
| 1                         | 11.751623000 | -4.340233000 | 0.822568000  | 1                         | 8.083133000  | -5.990659000 | 5.013887000  |
| 6                         | 2.217400000  | -8.693044000 | 0.291023000  | 6                         | -0.530653000 | -9.342594000 | -0.483303000 |
| 1                         | 2.540869000  | -9.250492000 | 1.184429000  | 1                         | -0.536233000 | -9.999859000 | 0.401421000  |
| 1                         | 1.159011000  | -8.428690000 | 0.435681000  | 1                         | -1.491929000 | -8.807328000 | -0.498781000 |
| 1                         | 2.282550000  | -9.372849000 | -0.569676000 | 1                         | -0.484623000 | -9.985531000 | -1.373156000 |
| 6                         | 0.333190000  | -7.890205000 | 3.849760000  | 6                         | -2.554431000 | -8.050825000 | 2.776923000  |
| 1                         | 0.998641000  | -8.515506000 | 3.237445000  | 1                         | -2.191220000 | -8.804635000 | 2.064841000  |
| 1                         | 0.948385000  | -7.147919000 | 4.378070000  | 1                         | -1.693383000 | -7.673951000 | 3.347791000  |
| 1                         | -0.116375000 | -8.546104000 | 4.613435000  | 1                         | -3.215825000 | -8.568411000 | 3.491258000  |
| <b>3b</b>                 |              |              |              | <b>3b</b>                 |              |              |              |
| <b>Cam-b3lyp/def2-SVP</b> |              |              |              | <b>Cam-b3lyp/def2-SVP</b> |              |              |              |
| <b>-2 1</b>               |              |              |              | <b>-2 3</b>               |              |              |              |
| 6                         | -0.195256000 | 4.288366000  | 0.012017000  | 6                         | -2.262714000 | 3.585523000  | -0.021895000 |

|   |              |              |              |   |              |              |              |
|---|--------------|--------------|--------------|---|--------------|--------------|--------------|
| 6 | 1.187406000  | 4.118118000  | 0.092235000  | 6 | -0.921587000 | 4.099198000  | 0.093689000  |
| 6 | 1.411498000  | 5.583333000  | 0.204633000  | 6 | -1.435603000 | 5.473348000  | 0.244661000  |
| 6 | -0.075170000 | 5.761335000  | -0.018508000 | 6 | -2.820741000 | 4.941050000  | -0.047358000 |
| 6 | -0.978828000 | 6.747105000  | -0.270576000 | 6 | -4.030400000 | 5.490396000  | -0.368770000 |
| 6 | -0.608561000 | 8.117960000  | -0.690653000 | 6 | -4.137379000 | 6.889235000  | -0.854392000 |
| 6 | -1.375644000 | 9.230690000  | -0.313740000 | 6 | -5.171057000 | 7.746988000  | -0.447295000 |
| 1 | -2.249304000 | 9.082778000  | 0.323276000  | 1 | -5.895750000 | 7.391017000  | 0.287412000  |
| 6 | -1.039986000 | 10.515120000 | -0.725788000 | 6 | -5.285978000 | 9.035110000  | -0.953993000 |
| 1 | -1.656833000 | 11.359439000 | -0.403679000 | 1 | -6.101104000 | 9.677153000  | -0.605713000 |
| 6 | 0.071876000  | 10.748750000 | -1.538443000 | 6 | -4.377688000 | 9.529765000  | -1.895379000 |
| 6 | 0.825548000  | 9.640493000  | -1.934689000 | 6 | -3.355775000 | 8.676584000  | -2.314726000 |
| 1 | 1.695312000  | 9.785643000  | -2.581880000 | 1 | -2.635980000 | 9.025540000  | -3.061166000 |
| 6 | 0.492393000  | 8.355454000  | -1.527219000 | 6 | -3.238448000 | 7.385943000  | -1.808918000 |
| 1 | 1.091901000  | 7.508705000  | -1.864174000 | 1 | -2.440658000 | 6.734097000  | -2.168210000 |
| 6 | 2.481530000  | 6.322688000  | 0.590967000  | 6 | -0.936771000 | 6.640688000  | 0.737479000  |
| 6 | 2.401081000  | 7.752602000  | 0.986355000  | 6 | -1.824854000 | 7.718850000  | 1.253244000  |
| 6 | 1.367624000  | 8.242071000  | 1.794567000  | 6 | -2.828481000 | 7.438529000  | 2.188336000  |
| 1 | 0.584739000  | 7.558281000  | 2.124968000  | 1 | -2.984856000 | 6.404224000  | 2.498601000  |
| 6 | 1.327061000  | 9.576750000  | 2.180375000  | 6 | -3.612079000 | 8.451150000  | 2.733509000  |
| 1 | 0.501114000  | 9.925946000  | 2.806439000  | 1 | -4.384952000 | 8.195075000  | 3.464214000  |
| 6 | 2.316146000  | 10.479136000 | 1.782767000  | 6 | -3.427754000 | 9.785527000  | 2.368257000  |
| 6 | 3.362730000  | 9.988235000  | 0.997608000  | 6 | -2.417605000 | 10.071103000 | 1.444670000  |
| 1 | 4.159466000  | 10.666759000 | 0.678637000  | 1 | -2.244456000 | 11.108319000 | 1.141651000  |
| 6 | 3.408417000  | 8.653594000  | 0.613531000  | 6 | -1.630881000 | 9.061970000  | 0.903201000  |
| 1 | 4.241279000  | 8.295130000  | 0.005325000  | 1 | -0.843701000 | 9.313586000  | 0.189367000  |
| 6 | 3.818176000  | 5.686172000  | 0.762933000  | 6 | 0.517928000  | 6.829898000  | 0.956057000  |
| 6 | 4.550430000  | 5.903316000  | 1.938867000  | 6 | 0.996140000  | 7.513384000  | 2.085978000  |
| 1 | 4.133392000  | 6.549204000  | 2.714265000  | 1 | 0.282555000  | 7.924438000  | 2.802209000  |
| 6 | 5.781153000  | 5.293487000  | 2.144369000  | 6 | 2.357786000  | 7.650016000  | 2.327495000  |
| 1 | 6.316711000  | 5.466824000  | 3.082241000  | 1 | 2.691752000  | 8.171115000  | 3.229913000  |
| 6 | 6.339048000  | 4.445537000  | 1.183948000  | 6 | 3.308097000  | 7.114058000  | 1.454995000  |
| 6 | 5.618277000  | 4.239510000  | 0.004668000  | 6 | 2.837104000  | 6.447160000  | 0.320385000  |
| 1 | 6.016088000  | 3.562456000  | -0.755592000 | 1 | 3.550636000  | 5.994446000  | -0.372934000 |
| 6 | 4.387597000  | 4.852692000  | -0.206629000 | 6 | 1.476450000  | 6.318749000  | 0.068752000  |
| 1 | 3.848113000  | 4.669604000  | -1.136818000 | 1 | 1.145926000  | 5.797196000  | -0.829264000 |
| 6 | 1.957704000  | 2.960132000  | 0.085496000  | 6 | 0.288341000  | 3.446559000  | 0.089326000  |

|   |              |              |              |   |              |              |              |
|---|--------------|--------------|--------------|---|--------------|--------------|--------------|
| 6 | 2.517884000  | 1.866257000  | 0.026700000  | 6 | 1.306709000  | 2.746441000  | 0.032519000  |
| 6 | 3.077419000  | 0.637170000  | -0.038113000 | 6 | 2.376376000  | 1.926070000  | -0.029874000 |
| 6 | 3.507312000  | -0.520210000 | -0.076534000 | 6 | 3.308935000  | 1.119934000  | -0.083197000 |
| 6 | 3.818659000  | -1.861420000 | -0.092879000 | 6 | 4.230697000  | 0.087565000  | -0.121880000 |
| 6 | 2.909846000  | -3.012620000 | 0.027455000  | 6 | 4.028365000  | -1.326701000 | -0.042370000 |
| 6 | 4.098366000  | -3.913128000 | -0.093910000 | 6 | 5.481677000  | -1.561345000 | -0.211809000 |
| 6 | 4.993888000  | -2.698542000 | -0.057512000 | 6 | 5.683945000  | -0.068785000 | -0.150716000 |
| 6 | 6.359773000  | -2.511195000 | 0.046458000  | 6 | 6.760070000  | 0.772662000  | -0.027003000 |
| 6 | 6.990846000  | -1.244274000 | -0.365196000 | 6 | 6.648879000  | 2.214643000  | -0.338683000 |
| 6 | 6.464103000  | -0.471460000 | -1.420429000 | 6 | 5.829126000  | 2.671912000  | -1.386582000 |
| 1 | 5.547699000  | -0.802060000 | -1.910001000 | 1 | 5.235721000  | 1.949932000  | -1.948345000 |
| 6 | 7.091141000  | 0.682430000  | -1.866747000 | 6 | 5.777155000  | 4.013985000  | -1.736468000 |
| 1 | 6.645570000  | 1.239451000  | -2.696808000 | 1 | 5.130769000  | 4.322097000  | -2.563482000 |
| 6 | 8.284024000  | 1.138753000  | -1.293216000 | 6 | 6.545216000  | 4.973786000  | -1.068003000 |
| 6 | 8.803710000  | 0.392670000  | -0.233040000 | 6 | 7.345764000  | 4.530783000  | -0.012397000 |
| 1 | 9.726047000  | 0.724985000  | 0.254010000  | 1 | 7.948375000  | 5.255384000  | 0.543680000  |
| 6 | 8.175399000  | -0.761945000 | 0.222862000  | 6 | 7.396082000  | 3.187430000  | 0.346065000  |
| 1 | 8.615409000  | -1.308575000 | 1.058314000  | 1 | 8.033719000  | 2.881816000  | 1.177280000  |
| 6 | 7.209325000  | -3.556664000 | 0.659505000  | 6 | 8.054784000  | 0.277332000  | 0.501147000  |
| 6 | 8.493447000  | -3.871786000 | 0.179169000  | 6 | 9.290411000  | 0.685395000  | -0.026999000 |
| 1 | 8.867395000  | -3.354828000 | -0.706414000 | 1 | 9.302452000  | 1.357751000  | -0.886844000 |
| 6 | 9.289701000  | -4.827136000 | 0.796292000  | 6 | 10.491357000 | 0.247071000  | 0.515062000  |
| 1 | 10.280565000 | -5.044111000 | 0.384055000  | 1 | 11.433611000 | 0.581591000  | 0.069742000  |
| 6 | 8.849372000  | -5.525996000 | 1.925547000  | 6 | 10.521202000 | -0.618517000 | 1.613590000  |
| 6 | 7.579206000  | -5.215881000 | 2.413897000  | 6 | 9.296905000  | -1.017960000 | 2.151360000  |
| 1 | 7.205728000  | -5.730066000 | 3.304911000  | 1 | 9.282328000  | -1.682647000 | 3.020310000  |
| 6 | 6.782225000  | -4.253476000 | 1.802189000  | 6 | 8.092185000  | -0.579605000 | 1.611037000  |
| 1 | 5.805747000  | -4.014315000 | 2.226523000  | 1 | 7.150481000  | -0.891662000 | 2.065186000  |
| 6 | 4.253723000  | -5.205756000 | -0.470189000 | 6 | 6.247141000  | -2.627914000 | -0.566790000 |
| 6 | 5.540901000  | -5.719313000 | -1.022371000 | 6 | 7.596424000  | -2.452938000 | -1.173012000 |
| 6 | 6.135508000  | -5.107459000 | -2.130637000 | 6 | 7.784290000  | -1.602729000 | -2.269012000 |
| 1 | 5.677105000  | -4.208758000 | -2.546184000 | 1 | 6.934162000  | -1.030461000 | -2.643458000 |
| 6 | 7.288140000  | -5.631093000 | -2.708317000 | 6 | 9.024354000  | -1.488364000 | -2.890488000 |
| 1 | 7.727032000  | -5.130325000 | -3.576151000 | 1 | 9.134019000  | -0.816136000 | -3.746518000 |
| 6 | 7.894249000  | -6.780857000 | -2.199178000 | 6 | 10.127779000 | -2.216141000 | -2.443232000 |
| 6 | 7.296355000  | -7.397727000 | -1.096786000 | 6 | 9.940565000  | -3.076230000 | -1.356612000 |

|   |              |              |              |   |              |              |              |
|---|--------------|--------------|--------------|---|--------------|--------------|--------------|
| 1 | 7.746906000  | -8.302083000 | -0.676894000 | 1 | 10.785519000 | -3.664023000 | -0.985063000 |
| 6 | 6.140314000  | -6.881415000 | -0.523627000 | 6 | 8.702178000  | -3.196186000 | -0.738706000 |
| 1 | 5.686924000  | -7.386788000 | 0.331574000  | 1 | 8.581728000  | -3.880414000 | 0.103757000  |
| 6 | 3.112251000  | -6.154698000 | -0.509365000 | 6 | 5.722944000  | -4.014599000 | -0.524016000 |
| 6 | 2.095262000  | -6.135837000 | 0.455153000  | 6 | 4.868701000  | -4.455620000 | 0.498006000  |
| 1 | 2.154946000  | -5.424198000 | 1.278160000  | 1 | 4.594191000  | -3.766471000 | 1.296776000  |
| 6 | 1.007766000  | -6.996779000 | 0.372166000  | 6 | 4.360544000  | -5.748387000 | 0.507242000  |
| 1 | 0.214435000  | -6.923726000 | 1.120584000  | 1 | 3.674612000  | -6.044659000 | 1.304841000  |
| 6 | 0.895139000  | -7.929507000 | -0.662932000 | 6 | 4.694756000  | -6.668810000 | -0.490744000 |
| 6 | 1.918817000  | -7.967842000 | -1.611980000 | 6 | 5.558490000  | -6.240473000 | -1.500579000 |
| 1 | 1.857644000  | -8.681612000 | -2.438858000 | 1 | 5.832700000  | -6.933110000 | -2.301984000 |
| 6 | 3.004452000  | -7.103246000 | -1.537554000 | 6 | 6.063037000  | -4.945478000 | -1.518075000 |
| 1 | 3.778034000  | -7.148332000 | -2.305908000 | 1 | 6.722633000  | -4.639784000 | -2.331973000 |
| 6 | 1.584594000  | -3.102160000 | 0.147100000  | 6 | 2.874001000  | -2.058236000 | 0.077612000  |
| 6 | 0.324068000  | -3.023576000 | 0.268723000  | 6 | 1.755009000  | -2.581928000 | 0.196720000  |
| 6 | -0.969654000 | -2.873019000 | 0.357397000  | 6 | 0.511332000  | -3.076371000 | 0.284766000  |
| 6 | -2.218323000 | -2.653727000 | 0.388183000  | 6 | -0.667544000 | -3.462584000 | 0.317539000  |
| 6 | -3.489571000 | -2.251132000 | 0.317305000  | 6 | -2.012331000 | -3.728807000 | 0.251060000  |
| 6 | -4.102101000 | -0.954540000 | 0.020417000  | 6 | -3.116107000 | -2.877278000 | -0.059824000 |
| 6 | -5.438052000 | -1.493733000 | 0.041409000  | 6 | -4.056993000 | -3.998201000 | -0.059428000 |
| 6 | -4.854536000 | -2.861762000 | 0.300616000  | 6 | -2.893252000 | -4.913512000 | 0.286128000  |
| 6 | -5.300521000 | -4.142168000 | 0.304245000  | 6 | -2.638986000 | -6.236886000 | 0.495962000  |
| 6 | -4.459741000 | -5.259959000 | 0.807330000  | 6 | -1.350117000 | -6.658564000 | 1.111256000  |
| 6 | -3.627148000 | -5.094844000 | 1.925409000  | 6 | -0.820532000 | -5.988179000 | 2.222141000  |
| 1 | -3.563106000 | -4.114519000 | 2.397870000  | 1 | -1.342087000 | -5.113049000 | 2.611427000  |
| 6 | -2.901256000 | -6.156416000 | 2.448260000  | 6 | 0.346222000  | -6.421764000 | 2.842245000  |
| 1 | -2.267445000 | -5.987358000 | 3.323421000  | 1 | 0.728092000  | -5.868173000 | 3.704404000  |
| 6 | -2.976605000 | -7.436066000 | 1.888722000  | 6 | 1.032741000  | -7.550480000 | 2.390805000  |
| 6 | -3.793595000 | -7.602512000 | 0.768481000  | 6 | 0.515688000  | -8.216469000 | 1.274531000  |
| 1 | -3.869765000 | -8.588810000 | 0.301465000  | 1 | 1.034987000  | -9.097911000 | 0.886649000  |
| 6 | -4.520042000 | -6.539851000 | 0.239084000  | 6 | -0.646335000 | -7.781599000 | 0.649004000  |
| 1 | -5.154212000 | -6.707301000 | -0.633121000 | 1 | -1.023444000 | -8.325011000 | -0.219480000 |
| 6 | -6.629335000 | -4.514738000 | -0.255982000 | 6 | -3.566946000 | -7.327691000 | 0.114736000  |
| 6 | -7.513347000 | -5.363365000 | 0.421800000  | 6 | -3.715199000 | -8.476627000 | 0.906221000  |
| 1 | -7.249721000 | -5.717698000 | 1.420224000  | 1 | -3.158108000 | -8.552881000 | 1.841790000  |
| 6 | -8.716766000 | -5.755361000 | -0.151456000 | 6 | -4.562124000 | -9.512517000 | 0.529623000  |

|   |               |              |              |   |              |               |              |
|---|---------------|--------------|--------------|---|--------------|---------------|--------------|
| 1 | -9.390950000  | -6.409631000 | 0.409449000  | 1 | -4.660221000 | -10.388229000 | 1.178381000  |
| 6 | -9.083549000  | -5.325241000 | -1.429899000 | 6 | -5.296011000 | -9.452918000  | -0.657355000 |
| 6 | -8.196737000  | -4.492414000 | -2.113945000 | 6 | -5.136008000 | -8.319412000  | -1.458757000 |
| 1 | -8.450592000  | -4.145601000 | -3.119766000 | 1 | -5.689516000 | -8.243625000  | -2.399074000 |
| 6 | -6.994595000  | -4.092470000 | -1.539292000 | 6 | -4.289020000 | -7.283732000  | -1.086776000 |
| 1 | -6.314198000  | -3.444204000 | -2.093462000 | 1 | -4.176423000 | -6.414565000  | -1.736343000 |
| 6 | -6.722006000  | -0.982917000 | -0.055951000 | 6 | -5.411912000 | -4.054708000  | -0.263563000 |
| 6 | -7.852936000  | -1.655631000 | 0.619067000  | 6 | -6.275446000 | -5.167690000  | 0.182597000  |
| 6 | -7.710694000  | -2.177196000 | 1.916264000  | 6 | -6.042671000 | -5.835545000  | 1.395821000  |
| 1 | -6.741058000  | -2.092266000 | 2.409889000  | 1 | -5.190415000 | -5.533444000  | 2.006235000  |
| 6 | -8.774329000  | -2.769362000 | 2.589389000  | 6 | -6.874086000 | -6.858621000  | 1.830663000  |
| 1 | -8.616715000  | -3.156804000 | 3.600854000  | 1 | -6.653133000 | -7.357825000  | 2.778668000  |
| 6 | -10.040016000 | -2.864861000 | 2.008770000  | 6 | -7.986381000 | -7.261472000  | 1.085898000  |
| 6 | -10.195690000 | -2.337350000 | 0.722195000  | 6 | -8.235850000 | -6.588137000  | -0.112301000 |
| 1 | -11.174339000 | -2.394248000 | 0.234367000  | 1 | -9.100487000 | -6.874397000  | -0.719031000 |
| 6 | -9.134191000  | -1.751363000 | 0.045639000  | 6 | -7.403884000 | -5.565443000  | -0.552940000 |
| 1 | -9.292103000  | -1.356869000 | -0.959957000 | 1 | -7.626558000 | -5.062540000  | -1.495651000 |
| 6 | -6.971941000  | 0.303184000  | -0.731323000 | 6 | -6.088943000 | -2.908491000  | -0.928338000 |
| 6 | -6.173521000  | 0.729423000  | -1.813352000 | 6 | -5.541183000 | -2.310421000  | -2.072912000 |
| 1 | -5.342031000  | 0.101678000  | -2.134653000 | 1 | -4.593389000 | -2.684182000  | -2.462700000 |
| 6 | -6.425386000  | 1.913113000  | -2.488859000 | 6 | -6.181482000 | -1.262378000  | -2.721656000 |
| 1 | -5.773859000  | 2.197218000  | -3.320675000 | 1 | -5.716858000 | -0.819598000  | -3.606919000 |
| 6 | -7.494001000  | 2.745926000  | -2.136983000 | 6 | -7.403760000 | -0.763345000  | -2.265736000 |
| 6 | -8.289061000  | 2.337735000  | -1.064010000 | 6 | -7.960423000 | -1.361943000  | -1.131495000 |
| 1 | -9.129728000  | 2.965443000  | -0.750941000 | 1 | -8.920280000 | -1.000369000  | -0.750487000 |
| 6 | -8.034803000  | 1.154858000  | -0.375761000 | 6 | -7.318639000 | -2.406910000  | -0.475910000 |
| 1 | -8.676936000  | 0.883605000  | 0.463644000  | 1 | -7.780068000 | -2.848392000  | 0.409725000  |
| 6 | -3.492480000  | 0.283197000  | -0.085288000 | 6 | -3.182071000 | -1.499889000  | -0.176910000 |
| 6 | -2.826190000  | 1.318280000  | -0.123218000 | 6 | -3.107662000 | -0.268696000  | -0.199029000 |
| 6 | -2.010496000  | 2.404117000  | -0.106014000 | 6 | -2.942303000 | 1.072306000   | -0.180999000 |
| 6 | -1.219090000  | 3.341116000  | -0.063845000 | 6 | -2.706090000 | 2.283978000   | -0.126195000 |
| 6 | -2.433346000  | 6.446881000  | -0.159256000 | 6 | -5.272214000 | 4.683670000   | -0.330002000 |
| 6 | -3.351966000  | 6.856742000  | -1.134967000 | 6 | -6.323851000 | 4.888227000   | -1.237053000 |
| 6 | -2.942538000  | 5.780088000  | 0.963183000  | 6 | -5.469725000 | 3.704697000   | 0.659103000  |
| 6 | -4.712840000  | 6.608622000  | -0.992771000 | 6 | -7.509750000 | 4.165284000   | -1.149632000 |
| 1 | -2.989682000  | 7.380656000  | -2.022055000 | 1 | -6.208364000 | 5.630645000   | -2.028741000 |

|   |               |              |              |   |              |               |              |
|---|---------------|--------------|--------------|---|--------------|---------------|--------------|
| 6 | -4.302421000  | 5.532419000  | 1.101441000  | 6 | -6.650957000 | 2.981277000   | 0.738552000  |
| 1 | -2.254463000  | 5.458686000  | 1.746621000  | 1 | -4.678927000 | 3.519642000   | 1.386493000  |
| 6 | -5.216707000  | 5.943189000  | 0.128867000  | 6 | -7.703013000 | 3.203049000   | -0.155851000 |
| 1 | -5.403464000  | 6.939375000  | -1.774044000 | 1 | -8.306823000 | 4.354533000   | -1.875189000 |
| 1 | -4.662439000  | 5.004351000  | 1.988347000  | 1 | -6.760356000 | 2.225638000   | 1.521394000  |
| 6 | -11.183798000 | -3.538983000 | 2.719752000  | 6 | -8.861989000 | -8.393201000  | 1.555012000  |
| 1 | -12.143969000 | -3.043257000 | 2.507428000  | 1 | -9.788794000 | -8.456778000  | 0.965793000  |
| 1 | -11.287722000 | -4.592443000 | 2.406169000  | 1 | -8.343158000 | -9.362594000  | 1.464364000  |
| 1 | -11.036977000 | -3.538086000 | 3.810371000  | 1 | -9.142613000 | -8.277805000  | 2.614006000  |
| 6 | -10.409926000 | -5.712502000 | -2.028104000 | 6 | -6.246936000 | -10.550885000 | -1.054067000 |
| 1 | -10.719511000 | -6.720318000 | -1.711935000 | 1 | -6.097623000 | -11.454269000 | -0.444391000 |
| 1 | -11.202749000 | -5.013436000 | -1.711671000 | 1 | -7.295095000 | -10.232022000 | -0.925598000 |
| 1 | -10.378342000 | -5.694221000 | -3.127640000 | 1 | -6.123922000 | -10.831970000 | -2.111819000 |
| 6 | -7.756757000  | 4.025967000  | -2.885377000 | 6 | -8.071875000 | 0.396175000   | -2.955197000 |
| 1 | -8.649636000  | 4.540443000  | -2.499883000 | 1 | -9.155215000 | 0.411246000   | -2.763775000 |
| 1 | -6.907015000  | 4.723180000  | -2.800670000 | 1 | -7.660230000 | 1.355602000   | -2.600785000 |
| 1 | -7.914625000  | 3.842559000  | -3.961207000 | 1 | -7.917270000 | 0.358459000   | -4.044234000 |
| 6 | -6.685158000  | 5.653080000  | 0.282156000  | 6 | -8.994634000 | 2.439897000   | -0.028818000 |
| 1 | -7.292379000  | 6.280801000  | -0.386315000 | 1 | -9.661314000 | 2.631279000   | -0.882304000 |
| 1 | -6.905651000  | 4.600866000  | 0.041348000  | 1 | -8.812615000 | 1.355715000   | 0.022279000  |
| 1 | -7.021779000  | 5.827724000  | 1.315578000  | 1 | -9.538281000 | 2.721004000   | 0.888787000  |
| 6 | 0.465090000   | 12.141039000 | -1.955815000 | 6 | -4.479658000 | 10.942055000  | -2.408085000 |
| 1 | 0.742360000   | 12.181982000 | -3.020638000 | 1 | -5.527470000 | 11.268914000  | -2.492643000 |
| 1 | -0.352539000  | 12.858088000 | -1.790801000 | 1 | -3.972539000 | 11.649228000  | -1.729360000 |
| 1 | 1.338191000   | 12.495594000 | -1.382122000 | 1 | -4.009981000 | 11.047125000  | -3.397471000 |
| 6 | 2.235788000   | 11.933109000 | 2.165844000  | 6 | -4.308818000 | 10.875887000  | 2.918414000  |
| 1 | 1.909467000   | 12.059605000 | 3.209570000  | 1 | -3.759221000 | 11.822606000  | 3.033870000  |
| 1 | 3.207162000   | 12.436096000 | 2.050063000  | 1 | -5.160596000 | 11.074011000  | 2.245420000  |
| 1 | 1.507653000   | 12.468342000 | 1.533059000  | 1 | -4.725390000 | 10.602181000  | 3.899219000  |
| 6 | 7.669654000   | 3.778933000  | 1.407984000  | 6 | 4.783852000  | 7.253494000   | 1.719942000  |
| 1 | 7.638378000   | 2.716825000  | 1.124368000  | 1 | 5.320993000  | 6.321275000   | 1.490298000  |
| 1 | 8.461414000   | 4.250626000  | 0.802120000  | 1 | 5.232939000  | 8.046947000   | 1.098472000  |
| 1 | 7.975897000   | 3.844454000  | 2.462179000  | 1 | 4.977999000  | 7.510429000   | 2.771847000  |
| 6 | 8.974916000   | 2.372510000  | -1.811813000 | 6 | 6.520885000  | 6.418779000   | -1.492181000 |
| 1 | 8.305033000   | 3.247539000  | -1.808810000 | 1 | 5.496646000  | 6.823372000   | -1.499405000 |
| 1 | 9.854042000   | 2.625592000  | -1.200902000 | 1 | 7.121436000  | 7.045112000   | -0.816755000 |

|   |              |              |              |   |              |              |              |
|---|--------------|--------------|--------------|---|--------------|--------------|--------------|
| 1 | 9.319945000  | 2.237852000  | -2.850856000 | 1 | 6.923471000  | 6.544677000  | -2.511042000 |
| 6 | 9.172365000  | -7.316048000 | -2.788810000 | 6 | 11.482292000 | -2.054656000 | -3.081123000 |
| 1 | 10.050474000 | -6.920765000 | -2.250226000 | 1 | 12.089123000 | -1.310455000 | -2.537550000 |
| 1 | 9.219871000  | -8.413938000 | -2.726179000 | 1 | 12.047740000 | -2.999086000 | -3.078321000 |
| 1 | 9.281207000  | -7.029488000 | -3.845381000 | 1 | 11.399678000 | -1.710150000 | -4.122639000 |
| 6 | 9.701001000  | -6.591360000 | 2.564347000  | 6 | 11.825741000 | -1.125243000 | 2.169642000  |
| 1 | 9.616141000  | -7.551045000 | 2.025443000  | 1 | 12.189396000 | -1.998063000 | 1.600492000  |
| 1 | 10.767049000 | -6.314920000 | 2.563916000  | 1 | 12.613236000 | -0.357298000 | 2.122583000  |
| 1 | 9.400238000  | -6.776082000 | 3.606525000  | 1 | 11.721603000 | -1.440871000 | 3.218427000  |
| 6 | -0.287364000 | -8.857737000 | -0.746572000 | 6 | 4.143443000  | -8.069718000 | -0.470234000 |
| 1 | -0.249419000 | -9.631555000 | 0.038404000  | 1 | 4.595352000  | -8.670361000 | 0.337537000  |
| 1 | -1.232799000 | -8.310612000 | -0.614295000 | 1 | 3.056031000  | -8.065476000 | -0.302693000 |
| 1 | -0.323044000 | -9.372619000 | -1.717828000 | 1 | 4.340215000  | -8.591508000 | -1.418249000 |
| 6 | -2.212601000 | -8.587035000 | 2.488870000  | 6 | 2.261357000  | -8.055370000 | 3.100975000  |
| 1 | -2.398974000 | -9.522037000 | 1.941334000  | 1 | 2.972830000  | -8.514358000 | 2.399000000  |
| 1 | -1.126701000 | -8.403023000 | 2.473520000  | 1 | 2.783170000  | -7.243722000 | 3.628727000  |
| 1 | -2.496193000 | -8.750218000 | 3.541216000  | 1 | 2.003712000  | -8.821674000 | 3.852255000  |

|                           |             |              |              |                           |             |             |              |
|---------------------------|-------------|--------------|--------------|---------------------------|-------------|-------------|--------------|
| <b>3c</b>                 |             |              |              | <b>3c</b>                 |             |             |              |
| <b>Cam-b3lyp/def2-SVP</b> |             |              |              | <b>Cam-b3lyp/def2-SVP</b> |             |             |              |
| <b>0 1</b>                |             |              |              | <b>0 3</b>                |             |             |              |
| 6                         | 2.865595000 | -3.099995000 | -0.013766000 | 6                         | 3.552893000 | 2.283301000 | 0.041012000  |
| 6                         | 1.722255000 | -3.880678000 | 0.053455000  | 6                         | 4.125420000 | 1.020470000 | 0.065146000  |
| 6                         | 2.515394000 | -5.129891000 | 0.227777000  | 6                         | 5.493234000 | 1.585709000 | 0.242030000  |
| 6                         | 3.759307000 | -4.286316000 | 0.045417000  | 6                         | 4.868514000 | 2.958829000 | 0.106580000  |
| 6                         | 5.090241000 | -4.418242000 | -0.155598000 | 6                         | 5.219638000 | 4.256499000 | -0.065313000 |
| 6                         | 5.765532000 | -5.704594000 | -0.446867000 | 6                         | 6.593992000 | 4.716924000 | -0.368812000 |
| 6                         | 7.055616000 | -5.960632000 | 0.043168000  | 6                         | 7.064810000 | 5.938965000 | 0.136706000  |
| 1                         | 7.552797000 | -5.213034000 | 0.663140000  | 1                         | 6.417951000 | 6.539263000 | 0.778344000  |
| 6                         | 7.709555000 | -7.153512000 | -0.234927000 | 6                         | 8.343664000 | 6.395537000 | -0.153192000 |
| 1                         | 8.707667000 | -7.365337000 | 0.151061000  | 1                         | 8.721132000 | 7.338615000 | 0.244581000  |
| 6                         | 7.071893000 | -8.097604000 | -1.027929000 | 6                         | 9.158799000 | 5.627815000 | -0.973463000 |
| 6                         | 5.805665000 | -7.872462000 | -1.547712000 | 6                         | 8.722413000 | 4.424666000 | -1.508506000 |
| 1                         | 5.343879000 | -8.633115000 | -2.178514000 | 1                         | 9.387792000 | 3.857064000 | -2.160323000 |
| 6                         | 5.161453000 | -6.676595000 | -1.255567000 | 6                         | 7.442389000 | 3.977985000 | -1.204639000 |
| 1                         | 4.171642000 | -6.485183000 | -1.671546000 | 1                         | 7.086022000 | 3.040425000 | -1.632830000 |

|   |              |               |              |   |              |              |              |
|---|--------------|---------------|--------------|---|--------------|--------------|--------------|
| 6 | 2.163001000  | -6.371808000  | 0.627009000  | 6 | 6.664141000  | 1.020448000  | 0.609492000  |
| 6 | 3.115475000  | -7.395203000  | 1.123016000  | 6 | 7.837455000  | 1.780278000  | 1.107872000  |
| 6 | 4.177044000  | -7.058596000  | 1.972155000  | 6 | 7.691929000  | 2.854713000  | 1.994051000  |
| 1 | 4.318078000  | -6.017525000  | 2.264614000  | 1 | 6.692727000  | 3.151117000  | 2.315073000  |
| 6 | 5.044830000  | -8.029087000  | 2.458975000  | 6 | 8.798248000  | 3.541206000  | 2.480955000  |
| 1 | 5.872445000  | -7.776763000  | 3.123138000  | 1 | 8.694634000  | 4.377544000  | 3.173452000  |
| 6 | 4.846732000  | -9.351901000  | 2.092553000  | 6 | 10.064788000 | 3.146020000  | 2.077509000  |
| 6 | 3.797499000  | -9.726840000  | 1.264459000  | 6 | 10.250547000 | 2.076644000  | 1.211949000  |
| 1 | 3.670883000  | -10.778613000 | 1.004025000  | 1 | 11.263193000 | 1.792097000  | 0.922659000  |
| 6 | 2.933491000  | -8.747194000  | 0.793850000  | 6 | 9.136108000  | 1.395420000  | 0.741112000  |
| 1 | 2.101258000  | -9.034827000  | 0.149185000  | 1 | 9.274103000  | 0.548776000  | 0.066440000  |
| 6 | 0.725084000  | -6.762281000  | 0.644855000  | 6 | 6.814531000  | -0.462299000 | 0.589739000  |
| 6 | 0.147700000  | -7.270672000  | 1.817391000  | 6 | 7.265268000  | -1.137659000 | 1.733526000  |
| 1 | 0.755501000  | -7.359472000  | 2.719802000  | 1 | 7.482610000  | -0.570294000 | 2.640379000  |
| 6 | -1.185691000 | -7.655310000  | 1.851569000  | 6 | 7.433836000  | -2.515576000 | 1.734239000  |
| 1 | -1.650140000 | -8.039635000  | 2.760800000  | 1 | 7.772736000  | -3.053152000 | 2.620947000  |
| 6 | -1.940370000 | -7.552175000  | 0.690832000  | 6 | 7.169446000  | -3.219692000 | 0.567697000  |
| 6 | -1.401162000 | -7.071376000  | -0.491783000 | 6 | 6.735686000  | -2.588872000 | -0.586867000 |
| 1 | -2.026969000 | -7.027215000  | -1.381944000 | 1 | 6.555240000  | -3.180797000 | -1.483653000 |
| 6 | -0.068167000 | -6.671816000  | -0.503435000 | 6 | 6.555571000  | -1.208548000 | -0.564733000 |
| 1 | 0.370937000  | -6.296994000  | -1.429773000 | 1 | 6.222988000  | -0.697584000 | -1.469992000 |
| 6 | 0.379844000  | -3.494584000  | 0.009471000  | 6 | 3.513235000  | -0.231628000 | -0.000259000 |
| 6 | -0.739904000 | -3.006761000  | -0.053181000 | 6 | 2.829214000  | -1.248397000 | -0.074407000 |
| 6 | -1.949822000 | -2.383426000  | -0.114198000 | 6 | 2.008706000  | -2.322321000 | -0.141431000 |
| 6 | -2.998907000 | -1.756592000  | -0.156194000 | 6 | 1.205963000  | -3.259685000 | -0.181980000 |
| 6 | -4.121175000 | -0.923036000  | -0.157839000 | 6 | 0.211128000  | -4.203235000 | -0.185570000 |
| 6 | -4.220087000 | 0.448295000   | 0.022106000  | 6 | -1.261257000 | -4.053053000 | 0.033325000  |
| 6 | -5.704992000 | 0.418092000   | -0.096475000 | 6 | -1.405831000 | -5.530093000 | -0.071853000 |
| 6 | -5.597384000 | -1.087520000  | -0.214679000 | 6 | 0.095683000  | -5.634701000 | -0.222828000 |
| 6 | -6.371763000 | -2.196677000  | -0.247822000 | 6 | 1.090457000  | -6.599297000 | -0.302043000 |
| 6 | -5.758096000 | -3.490382000  | -0.660306000 | 6 | 2.397334000  | -6.187984000 | -0.871821000 |
| 6 | -5.075630000 | -3.580415000  | -1.879227000 | 6 | 2.445393000  | -5.552299000 | -2.121130000 |
| 1 | -4.969513000 | -2.688912000  | -2.499721000 | 1 | 1.515010000  | -5.352050000 | -2.655156000 |
| 6 | -4.553330000 | -4.789779000  | -2.324505000 | 6 | 3.654525000  | -5.185453000 | -2.696773000 |
| 1 | -4.033222000 | -4.873349000  | -3.279735000 | 1 | 3.703622000  | -4.701233000 | -3.672927000 |
| 6 | -4.716553000 | -5.914255000  | -1.533021000 | 6 | 4.825335000  | -5.449003000 | -2.003538000 |

|   |               |              |              |   |              |               |              |
|---|---------------|--------------|--------------|---|--------------|---------------|--------------|
| 6 | -5.372639000  | -5.864865000 | -0.310505000 | 6 | 4.823844000  | -6.062654000  | -0.759070000 |
| 1 | -5.450635000  | -6.771522000 | 0.289034000  | 1 | 5.768886000  | -6.215194000  | -0.238037000 |
| 6 | -5.901349000  | -4.651858000 | 0.111857000  | 6 | 3.606349000  | -6.441027000  | -0.206514000 |
| 1 | -6.433521000  | -4.601198000 | 1.063690000  | 1 | 3.589625000  | -6.928229000  | 0.770104000  |
| 6 | -7.810123000  | -2.226956000 | 0.101560000  | 6 | 0.943048000  | -7.981356000  | 0.163118000  |
| 6 | -8.690784000  | -3.097617000 | -0.559327000 | 6 | 1.709496000  | -9.019409000  | -0.400442000 |
| 1 | -8.314608000  | -3.738191000 | -1.358339000 | 1 | 2.401033000  | -8.795583000  | -1.213354000 |
| 6 | -10.037499000 | -3.152180000 | -0.225600000 | 6 | 1.590096000  | -10.328816000 | 0.042151000  |
| 1 | -10.730805000 | -3.818184000 | -0.741200000 | 1 | 2.172327000  | -11.139046000 | -0.398944000 |
| 6 | -10.508479000 | -2.335917000 | 0.793460000  | 6 | 0.702386000  | -10.610906000 | 1.072030000  |
| 6 | -9.665549000  | -1.476397000 | 1.482886000  | 6 | -0.061560000 | -9.614496000  | 1.665452000  |
| 1 | -10.071107000 | -0.861159000 | 2.287082000  | 1 | -0.738903000 | -9.874488000  | 2.479871000  |
| 6 | -8.321628000  | -1.429342000 | 1.134446000  | 6 | 0.061806000  | -8.310728000  | 1.208872000  |
| 1 | -7.648259000  | -0.768414000 | 1.681526000  | 1 | -0.524505000 | -7.522210000  | 1.681467000  |
| 6 | -6.621302000  | 1.398406000  | -0.257498000 | 6 | -2.504729000 | -6.310900000  | -0.211567000 |
| 6 | -8.012528000  | 1.171552000  | -0.723052000 | 6 | -2.470836000 | -7.732843000  | -0.630742000 |
| 6 | -8.299029000  | 0.296025000  | -1.777236000 | 6 | -1.640472000 | -8.175708000  | -1.667804000 |
| 1 | -7.484354000  | -0.248457000 | -2.256057000 | 1 | -0.989371000 | -7.462257000  | -2.174253000 |
| 6 | -9.600744000  | 0.118911000  | -2.232006000 | 6 | -1.642380000 | -9.504696000  | -2.074730000 |
| 1 | -9.833437000  | -0.558763000 | -3.054383000 | 1 | -1.002856000 | -9.857260000  | -2.884924000 |
| 6 | -10.626449000 | 0.827033000  | -1.624259000 | 6 | -2.482264000 | -10.402189000 | -1.432132000 |
| 6 | -10.380308000 | 1.714753000  | -0.585526000 | 6 | -3.329076000 | -9.999343000  | -0.408268000 |
| 1 | -11.213320000 | 2.258272000  | -0.137452000 | 1 | -3.980563000 | -10.733768000 | 0.067416000  |
| 6 | -9.073775000  | 1.888270000  | -0.149371000 | 6 | -3.325487000 | -8.665683000  | -0.022710000 |
| 1 | -8.870232000  | 2.591254000  | 0.660253000  | 1 | -3.995778000 | -8.338314000  | 0.773902000  |
| 6 | -6.247125000  | 2.823148000  | -0.031520000 | 6 | -3.861904000 | -5.733772000  | -0.005634000 |
| 6 | -5.659060000  | 3.251663000  | 1.163449000  | 6 | -4.203788000 | -5.045050000  | 1.163553000  |
| 1 | -5.453523000  | 2.524615000  | 1.951076000  | 1 | -3.456983000 | -4.917420000  | 1.948905000  |
| 6 | -5.351564000  | 4.592979000  | 1.375238000  | 6 | -5.484798000 | -4.534135000  | 1.350450000  |
| 1 | -4.906316000  | 4.946888000  | 2.304708000  | 1 | -5.772242000 | -4.005851000  | 2.259014000  |
| 6 | -5.632982000  | 5.505735000  | 0.371025000  | 6 | -6.424192000 | -4.710689000  | 0.346349000  |
| 6 | -6.212039000  | 5.119027000  | -0.829807000 | 6 | -6.123575000 | -5.387314000  | -0.827655000 |
| 1 | -6.415027000  | 5.870542000  | -1.594080000 | 1 | -6.892958000 | -5.503356000  | -1.592285000 |
| 6 | -6.525449000  | 3.780467000  | -1.018587000 | 6 | -4.846005000 | -5.904631000  | -0.990885000 |
| 1 | -6.993518000  | 3.466301000  | -1.953221000 | 1 | -4.600809000 | -6.447854000  | -1.905294000 |
| 6 | -3.212888000  | 1.402792000  | 0.179959000  | 6 | -1.998128000 | -2.956778000  | 0.194049000  |

|   |              |              |              |   |               |              |              |
|---|--------------|--------------|--------------|---|---------------|--------------|--------------|
| 6 | -2.235502000 | 2.129498000  | 0.288365000  | 6 | -2.544347000  | -1.825997000 | 0.319053000  |
| 6 | -1.096148000 | 2.872243000  | 0.351741000  | 6 | -3.050892000  | -0.612198000 | 0.391053000  |
| 6 | -0.032798000 | 3.475820000  | 0.347144000  | 6 | -3.466805000  | 0.567250000  | 0.394660000  |
| 6 | 1.242412000  | 4.031641000  | 0.217882000  | 6 | -3.778913000  | 1.886255000  | 0.270472000  |
| 6 | 2.439724000  | 3.429433000  | -0.133136000 | 6 | -2.963591000  | 3.000712000  | -0.071269000 |
| 6 | 3.157838000  | 4.731172000  | -0.176275000 | 6 | -4.117269000  | 3.900194000  | -0.151693000 |
| 6 | 1.846116000  | 5.389356000  | 0.207086000  | 6 | -5.004935000  | 2.729164000  | 0.212505000  |
| 6 | 1.290126000  | 6.604693000  | 0.418606000  | 6 | -6.305817000  | 2.386666000  | 0.371312000  |
| 6 | -0.045091000 | 6.666044000  | 1.078161000  | 6 | -6.611328000  | 1.078497000  | 1.018895000  |
| 6 | -0.252009000 | 6.016621000  | 2.301098000  | 6 | -6.082039000  | 0.784092000  | 2.281164000  |
| 1 | 0.569785000  | 5.462679000  | 2.758098000  | 1 | -5.442568000  | 1.516723000  | 2.776434000  |
| 6 | -1.480026000 | 6.077076000  | 2.950281000  | 6 | -6.364308000  | -0.419030000 | 2.917751000  |
| 1 | -1.648866000 | 5.580371000  | 3.906685000  | 1 | -5.962589000  | -0.655163000 | 3.904063000  |
| 6 | -2.507825000 | 6.794139000  | 2.360848000  | 6 | -7.181271000  | -1.334261000 | 2.274676000  |
| 6 | -2.343460000 | 7.453739000  | 1.149931000  | 6 | -7.726088000  | -1.081338000 | 1.023011000  |
| 1 | -3.188416000 | 7.987415000  | 0.715815000  | 1 | -8.345471000  | -1.842661000 | 0.549242000  |
| 6 | -1.105755000 | 7.394699000  | 0.522022000  | 6 | -7.446674000  | 0.133381000  | 0.408325000  |
| 1 | -0.960667000 | 7.914065000  | -0.427224000 | 1 | -7.873673000  | 0.348763000  | -0.573144000 |
| 6 | 1.905267000  | 7.894874000  | 0.035366000  | 6 | -7.460341000  | 3.205564000  | -0.057855000 |
| 6 | 1.744472000  | 9.032261000  | 0.841571000  | 6 | -8.645703000  | 3.220198000  | 0.693558000  |
| 1 | 1.180105000  | 8.955359000  | 1.772312000  | 1 | -8.704503000  | 2.638475000  | 1.614846000  |
| 6 | 2.300459000  | 10.253452000 | 0.483803000  | 6 | -9.743297000  | 3.971157000  | 0.293803000  |
| 1 | 2.190392000  | 11.140610000 | 1.109070000  | 1 | -10.664962000 | 3.997614000  | 0.876858000  |
| 6 | 3.012342000  | 10.342472000 | -0.704617000 | 6 | -9.660880000  | 4.703543000  | -0.882521000 |
| 6 | 3.173164000  | 9.245921000  | -1.539046000 | 6 | -8.514822000  | 4.695560000  | -1.664414000 |
| 1 | 3.727336000  | 9.360337000  | -2.471440000 | 1 | -8.494907000  | 5.272608000  | -2.589734000 |
| 6 | 2.617117000  | 8.029278000  | -1.164396000 | 6 | -7.422425000  | 3.945503000  | -1.247767000 |
| 1 | 2.725536000  | 7.164031000  | -1.819499000 | 1 | -6.521798000  | 3.921056000  | -1.862387000 |
| 6 | 4.460629000  | 5.025321000  | -0.390534000 | 6 | -4.192004000  | 5.247389000  | -0.372981000 |
| 6 | 5.088588000  | 6.331291000  | -0.081652000 | 6 | -5.375277000  | 6.075917000  | -0.061344000 |
| 6 | 4.776494000  | 7.028313000  | 1.092657000  | 6 | -6.140888000  | 5.850447000  | 1.091531000  |
| 1 | 4.047752000  | 6.606089000  | 1.785647000  | 1 | -5.862352000  | 5.040693000  | 1.766840000  |
| 6 | 5.387898000  | 8.239000000  | 1.395142000  | 6 | -7.236575000  | 6.647962000  | 1.396422000  |
| 1 | 5.152609000  | 8.788150000  | 2.307624000  | 1 | -7.835547000  | 6.481071000  | 2.292497000  |
| 6 | 6.323450000  | 8.757069000  | 0.511939000  | 6 | -7.572370000  | 7.684318000  | 0.537443000  |
| 6 | 6.670737000  | 8.088520000  | -0.654225000 | 6 | -6.831972000  | 7.948593000  | -0.606995000 |

|   |               |               |              |   |               |               |              |
|---|---------------|---------------|--------------|---|---------------|---------------|--------------|
| 1 | 7.416747000   | 8.525668000   | -1.319438000 | 1 | -7.125118000  | 8.776275000   | -1.254406000 |
| 6 | 6.057613000   | 6.875469000   | -0.938309000 | 6 | -5.734090000  | 7.148793000   | -0.893745000 |
| 1 | 6.329558000   | 6.339985000   | -1.849510000 | 1 | -5.145106000  | 7.352475000   | -1.789447000 |
| 6 | 5.358973000   | 3.971935000   | -0.941999000 | 6 | -3.002111000  | 5.955292000   | -0.914329000 |
| 6 | 5.011992000   | 3.263903000   | -2.098464000 | 6 | -2.322771000  | 5.473081000   | -2.040446000 |
| 1 | 4.073595000   | 3.493071000   | -2.606221000 | 1 | -2.679771000  | 4.568774000   | -2.535820000 |
| 6 | 5.847017000   | 2.280194000   | -2.618583000 | 6 | -1.207910000  | 6.132694000   | -2.546752000 |
| 1 | 5.584986000   | 1.722548000   | -3.518666000 | 1 | -0.673059000  | 5.764567000   | -3.423208000 |
| 6 | 7.040330000   | 2.007137000   | -1.970011000 | 6 | -0.770603000  | 7.285855000   | -1.915067000 |
| 6 | 7.426896000   | 2.697874000   | -0.828637000 | 6 | -1.423710000  | 7.803556000   | -0.804117000 |
| 1 | 8.369192000   | 2.442638000   | -0.345249000 | 1 | -1.037356000  | 8.705750000   | -0.331213000 |
| 6 | 6.586112000   | 3.682175000   | -0.327559000 | 6 | -2.539945000  | 7.138614000   | -0.316760000 |
| 1 | 6.880407000   | 4.232427000   | 0.568165000  | 1 | -3.059644000  | 7.535852000   | 0.557006000  |
| 6 | 2.753409000   | 2.073817000   | -0.248717000 | 6 | -1.574723000  | 3.082124000   | -0.156146000 |
| 6 | 2.902105000   | 0.860617000   | -0.260549000 | 6 | -0.353759000  | 3.012164000   | -0.160439000 |
| 6 | 2.991661000   | -0.496746000  | -0.219964000 | 6 | 1.002946000   | 2.860363000   | -0.125582000 |
| 6 | 3.003039000   | -1.716308000  | -0.140291000 | 6 | 2.204609000   | 2.659593000   | -0.061105000 |
| 9 | 7.696093000   | -9.242098000  | -1.306682000 | 9 | 10.385274000  | 6.062837000   | -1.263665000 |
| 9 | 5.675745000   | -10.287321000 | 2.556652000  | 9 | 11.130012000  | 3.800214000   | 2.541619000  |
| 9 | -3.221118000  | -7.937442000  | 0.718304000  | 9 | 7.349522000   | -4.547225000  | 0.561209000  |
| 9 | -4.223973000  | -7.082755000  | -1.962908000 | 9 | 5.993606000   | -5.089987000  | -2.551677000 |
| 9 | -11.798387000 | -2.387949000  | 1.125672000  | 9 | 0.587205000   | -11.864357000 | 1.507151000  |
| 9 | -11.877031000 | 0.661133000   | -2.055678000 | 9 | -2.486082000  | -11.678836000 | -1.815267000 |
| 9 | -5.349860000  | 6.799296000   | 0.561107000  | 9 | -7.659241000  | -4.223839000  | 0.510178000  |
| 9 | -3.693506000  | 6.848615000   | 2.979521000  | 9 | -7.448091000  | -2.497640000  | 2.881250000  |
| 9 | 3.543204000   | 11.512758000  | -1.058635000 | 9 | -10.712714000 | 5.421077000   | -1.277155000 |
| 9 | 6.912715000   | 9.918677000   | 0.795555000  | 9 | -8.623589000  | 8.452114000   | 0.823662000  |
| 9 | 7.843476000   | 1.058162000   | -2.460564000 | 9 | 0.304694000   | 7.920241000   | -2.392019000 |
| 6 | 5.960987000   | -3.209189000  | -0.107853000 | 6 | 4.168531000   | 5.309604000   | 0.016496000  |
| 6 | 6.856771000   | -2.920222000  | -1.147790000 | 6 | 4.014314000   | 6.256974000   | -1.006656000 |
| 6 | 5.945179000   | -2.366532000  | 1.009436000  | 6 | 3.339064000   | 5.403725000   | 1.139878000  |
| 6 | 7.705662000   | -1.823318000  | -1.081621000 | 6 | 3.057177000   | 7.259043000   | -0.920754000 |
| 1 | 6.885956000   | -3.568258000  | -2.025851000 | 1 | 4.654702000   | 6.201744000   | -1.889057000 |
| 6 | 6.798477000   | -1.271144000  | 1.097587000  | 6 | 2.384431000   | 6.410168000   | 1.248188000  |
| 1 | 5.264823000   | -2.583989000  | 1.834608000  | 1 | 3.454499000   | 4.684466000   | 1.952531000  |
| 6 | 7.671414000   | -1.021698000  | 0.051570000  | 6 | 2.262011000   | 7.325149000   | 0.215694000  |

|                                        |              |               |              |                                        |             |               |              |
|----------------------------------------|--------------|---------------|--------------|----------------------------------------|-------------|---------------|--------------|
| 1                                      | 8.393401000  | -1.574294000  | -1.889919000 | 1                                      | 2.909002000 | 7.987847000   | -1.717684000 |
| 1                                      | 6.802744000  | -0.615564000  | 1.969305000  | 1                                      | 1.739734000 | 6.498099000   | 2.123592000  |
| 9                                      | 8.512644000  | 0.013404000   | 0.141522000  | 9                                      | 1.359607000 | 8.306173000   | 0.321243000  |
| <b>3c</b><br><b>Cam-b3lyp/def2-SVP</b> |              |               |              | <b>3c</b><br><b>Cam-b3lyp/def2-SVP</b> |             |               |              |
| <b>-2 1</b>                            |              |               |              | <b>-2 3</b>                            |             |               |              |
| 6                                      | -1.716436000 | -3.872566000  | 0.070621000  | 6                                      | 2.935102000 | -3.016910000  | -0.011502000 |
| 6                                      | -2.892525000 | -3.120422000  | 0.095542000  | 6                                      | 1.768008000 | -3.852955000  | 0.040120000  |
| 6                                      | -3.728416000 | -4.340267000  | 0.210840000  | 6                                      | 2.597275000 | -5.057005000  | 0.207056000  |
| 6                                      | -2.459399000 | -5.148285000  | 0.050040000  | 6                                      | 3.824966000 | -4.182121000  | 0.015910000  |
| 6                                      | -2.052433000 | -6.427708000  | -0.167354000 | 6                                      | 5.167606000 | -4.319344000  | -0.188191000 |
| 6                                      | -2.950254000 | -7.531728000  | -0.573928000 | 6                                      | 5.827052000 | -5.590727000  | -0.558270000 |
| 6                                      | -2.694631000 | -8.855045000  | -0.176559000 | 6                                      | 7.138425000 | -5.878865000  | -0.140985000 |
| 1                                      | -1.834843000 | -9.061105000  | 0.462823000  | 1                                      | 7.661589000 | -5.164230000  | 0.496350000  |
| 6                                      | -3.514273000 | -9.906121000  | -0.570018000 | 6                                      | 7.783583000 | -7.052741000  | -0.511688000 |
| 1                                      | -3.321082000 | -10.932855000 | -0.254397000 | 1                                      | 8.798469000 | -7.278285000  | -0.179267000 |
| 6                                      | -4.606596000 | -9.637659000  | -1.381173000 | 6                                      | 7.114318000 | -7.960486000  | -1.318372000 |
| 6                                      | -4.887683000 | -8.349355000  | -1.807796000 | 6                                      | 5.824510000 | -7.713858000  | -1.761049000 |
| 1                                      | -5.749873000 | -8.174993000  | -2.453375000 | 1                                      | 5.329049000 | -8.445400000  | -2.401540000 |
| 6                                      | -4.056040000 | -7.308911000  | -1.409135000 | 6                                      | 5.194501000 | -6.532443000  | -1.385953000 |
| 1                                      | -4.261952000 | -6.295583000  | -1.755205000 | 1                                      | 4.185758000 | -6.325804000  | -1.744836000 |
| 6                                      | -5.031322000 | -4.525894000  | 0.540582000  | 6                                      | 2.311738000 | -6.332108000  | 0.593245000  |
| 6                                      | -5.604593000 | -5.823797000  | 0.975061000  | 6                                      | 3.313843000 | -7.296429000  | 1.106155000  |
| 6                                      | -4.897860000 | -6.702005000  | 1.808422000  | 6                                      | 4.357599000 | -6.898561000  | 1.954871000  |
| 1                                      | -3.891270000 | -6.432957000  | 2.129506000  | 1                                      | 4.450606000 | -5.844865000  | 2.219229000  |
| 6                                      | -5.454177000 | -7.903676000  | 2.234760000  | 6                                      | 5.269227000 | -7.815740000  | 2.467470000  |
| 1                                      | -4.903382000 | -8.590620000  | 2.879058000  | 1                                      | 6.082880000 | -7.504414000  | 3.124574000  |
| 6                                      | -6.739534000 | -8.229776000  | 1.833808000  | 6                                      | 5.134201000 | -9.155141000  | 2.140055000  |
| 6                                      | -7.480670000 | -7.381713000  | 1.023985000  | 6                                      | 4.108989000 | -9.595634000  | 1.316537000  |
| 1                                      | -8.491564000 | -7.669445000  | 0.730201000  | 1                                      | 4.031726000 | -10.658076000 | 1.078785000  |
| 6                                      | -6.910754000 | -6.185235000  | 0.606703000  | 6                                      | 3.207836000 | -8.666330000  | 0.811008000  |
| 1                                      | -7.489037000 | -5.510971000  | -0.027410000 | 1                                      | 2.397823000 | -9.007500000  | 0.163918000  |
| 6                                      | -5.964290000 | -3.362556000  | 0.575812000  | 6                                      | 0.896087000 | -6.794552000  | 0.621732000  |
| 6                                      | -6.730088000 | -3.106904000  | 1.723419000  | 6                                      | 0.369891000 | -7.417519000  | 1.764512000  |
| 1                                      | -6.621671000 | -3.759011000  | 2.592382000  | 1                                      | 1.006592000 | -7.542689000  | 2.642468000  |

|   |              |              |              |   |               |              |              |
|---|--------------|--------------|--------------|---|---------------|--------------|--------------|
| 6 | -7.610989000 | -2.034729000 | 1.781904000  | 6 | -0.944279000  | -7.866941000 | 1.807479000  |
| 1 | -8.196303000 | -1.819488000 | 2.677416000  | 1 | -1.361879000  | -8.337948000 | 2.699082000  |
| 6 | -7.740753000 | -1.213230000 | 0.670666000  | 6 | -1.743660000  | -7.702563000 | 0.685732000  |
| 6 | -7.012864000 | -1.437276000 | -0.486557000 | 6 | -1.264070000  | -7.100509000 | -0.465726000 |
| 1 | -7.153617000 | -0.770604000 | -1.336552000 | 1 | -1.924470000  | -6.998524000 | -1.325639000 |
| 6 | -6.125782000 | -2.509801000 | -0.522775000 | 6 | 0.051661000   | -6.647211000 | -0.486161000 |
| 1 | -5.544858000 | -2.692255000 | -1.428178000 | 1 | 0.438007000   | -6.168167000 | -1.386923000 |
| 6 | -3.078295000 | -1.742644000 | 0.066350000  | 6 | 0.433005000   | -3.515987000 | -0.002658000 |
| 6 | -3.057050000 | -0.513295000 | 0.012033000  | 6 | -0.707180000  | -3.042419000 | -0.071284000 |
| 6 | -2.956456000 | 0.833585000  | -0.037994000 | 6 | -1.915427000  | -2.440494000 | -0.126322000 |
| 6 | -2.778494000 | 2.055833000  | -0.055467000 | 6 | -2.981804000  | -1.820660000 | -0.158056000 |
| 6 | -2.456323000 | 3.393601000  | -0.051349000 | 6 | -4.100426000  | -1.004458000 | -0.149760000 |
| 6 | -1.151142000 | 4.049108000  | 0.111434000  | 6 | -4.229655000  | 0.410397000  | 0.002575000  |
| 6 | -1.837174000 | 5.369669000  | -0.035600000 | 6 | -5.701944000  | 0.314663000  | -0.112124000 |
| 6 | -3.166430000 | 4.650265000  | -0.060932000 | 6 | -5.549980000  | -1.191196000 | -0.171211000 |
| 6 | -4.501219000 | 5.000233000  | -0.046722000 | 6 | -6.326352000  | -2.320140000 | -0.169698000 |
| 6 | -5.502004000 | 3.999082000  | -0.489105000 | 6 | -5.707083000  | -3.599372000 | -0.613737000 |
| 6 | -5.284194000 | 3.245546000  | -1.655474000 | 6 | -5.032220000  | -3.661932000 | -1.841368000 |
| 1 | -4.360002000 | 3.397409000  | -2.214835000 | 1 | -4.941177000  | -2.754493000 | -2.440248000 |
| 6 | -6.209243000 | 2.315669000  | -2.112455000 | 6 | -4.484415000  | -4.849539000 | -2.312183000 |
| 1 | -6.033002000 | 1.735146000  | -3.019719000 | 1 | -3.961260000  | -4.899637000 | -3.268352000 |
| 6 | -7.379638000 | 2.128367000  | -1.395826000 | 6 | -4.611156000  | -5.991823000 | -1.540768000 |
| 6 | -7.638794000 | 2.838037000  | -0.234119000 | 6 | -5.249768000  | -5.975824000 | -0.310020000 |
| 1 | -8.556128000 | 2.636068000  | 0.320450000  | 1 | -5.283800000  | -6.890334000 | 0.282727000  |
| 6 | -6.702433000 | 3.768575000  | 0.206026000  | 6 | -5.800120000  | -4.780139000 | 0.139232000  |
| 1 | -6.898215000 | 4.325060000  | 1.124586000  | 1 | -6.306961000  | -4.755107000 | 1.106000000  |
| 6 | -4.987502000 | 6.285835000  | 0.482248000  | 6 | -7.728696000  | -2.369282000 | 0.284218000  |
| 6 | -6.154710000 | 6.900575000  | -0.012792000 | 6 | -8.635824000  | -3.310233000 | -0.237383000 |
| 1 | -6.688736000 | 6.431897000  | -0.841054000 | 1 | -8.301406000  | -3.993688000 | -1.019231000 |
| 6 | -6.642718000 | 8.089707000  | 0.515972000  | 6 | -9.949869000  | -3.387159000 | 0.208743000  |
| 1 | -7.543858000 | 8.562820000  | 0.120932000  | 1 | -10.652469000 | -4.113534000 | -0.203859000 |
| 6 | -5.960356000 | 8.694031000  | 1.561152000  | 6 | -10.377099000 | -2.512947000 | 1.196545000  |
| 6 | -4.809760000 | 8.126975000  | 2.085086000  | 6 | -9.516694000  | -1.575014000 | 1.745540000  |
| 1 | -4.301266000 | 8.618644000  | 2.916671000  | 1 | -9.881340000  | -0.907394000 | 2.528031000  |
| 6 | -4.338726000 | 6.932168000  | 1.552009000  | 6 | -8.203214000  | -1.514905000 | 1.295115000  |
| 1 | -3.449900000 | 6.470245000  | 1.983554000  | 1 | -7.517661000  | -0.792637000 | 1.739423000  |

|   |              |              |              |   |               |              |              |
|---|--------------|--------------|--------------|---|---------------|--------------|--------------|
| 6 | -1.383703000 | 6.605494000  | -0.354176000 | 6 | -6.675681000  | 1.245051000  | -0.300541000 |
| 6 | -2.257921000 | 7.671734000  | -0.915856000 | 6 | -8.046662000  | 0.930392000  | -0.774474000 |
| 6 | -3.121535000 | 7.407021000  | -1.986225000 | 6 | -8.280690000  | -0.011983000 | -1.785703000 |
| 1 | -3.186448000 | 6.389910000  | -2.373695000 | 1 | -7.433906000  | -0.549157000 | -2.213535000 |
| 6 | -3.891779000 | 8.413358000  | -2.560684000 | 6 | -9.564973000  | -0.273786000 | -2.252409000 |
| 1 | -4.566675000 | 8.211698000  | -3.394031000 | 1 | -9.748079000  | -1.011398000 | -3.035320000 |
| 6 | -3.796073000 | 9.700888000  | -2.058173000 | 6 | -10.632947000 | 0.422846000  | -1.711159000 |
| 6 | -2.947678000 | 10.006617000 | -1.004911000 | 6 | -10.445577000 | 1.375130000  | -0.720230000 |
| 1 | -2.901434000 | 11.031935000 | -0.634293000 | 1 | -11.309843000 | 1.905631000  | -0.316777000 |
| 6 | -2.180416000 | 8.990252000  | -0.446779000 | 6 | -9.156684000  | 1.623758000  | -0.264483000 |
| 1 | -1.503499000 | 9.221546000  | 0.377950000  | 1 | -9.001454000  | 2.373701000  | 0.513270000  |
| 6 | 0.065340000  | 6.935388000  | -0.276044000 | 6 | -6.371523000  | 2.694605000  | -0.136989000 |
| 6 | 0.845123000  | 6.575344000  | 0.830691000  | 6 | -5.736739000  | 3.196086000  | 1.006602000  |
| 1 | 0.379068000  | 6.037266000  | 1.656556000  | 1 | -5.441864000  | 2.504311000  | 1.796729000  |
| 6 | 2.199311000  | 6.889417000  | 0.898912000  | 6 | -5.476915000  | 4.555563000  | 1.158494000  |
| 1 | 2.813359000  | 6.615234000  | 1.756016000  | 1 | -4.986660000  | 4.955746000  | 2.045329000  |
| 6 | 2.779228000  | 7.568682000  | -0.159454000 | 6 | -5.855439000  | 5.423440000  | 0.147614000  |
| 6 | 2.045004000  | 7.948132000  | -1.273097000 | 6 | -6.484474000  | 4.970589000  | -1.002780000 |
| 1 | 2.540913000  | 8.476993000  | -2.088809000 | 1 | -6.758737000  | 5.685189000  | -1.780747000 |
| 6 | 0.691926000  | 7.635442000  | -1.319123000 | 6 | -6.742316000  | 3.611865000  | -1.133172000 |
| 1 | 0.105944000  | 7.928794000  | -2.191905000 | 1 | -7.237212000  | 3.246315000  | -2.034910000 |
| 6 | 0.084617000  | 3.569604000  | 0.260677000  | 6 | -3.278595000  | 1.390410000  | 0.135400000  |
| 6 | 1.178010000  | 2.938731000  | 0.385794000  | 6 | -2.307235000  | 2.154144000  | 0.242919000  |
| 6 | 2.259062000  | 2.210444000  | 0.464100000  | 6 | -1.200424000  | 2.909729000  | 0.310338000  |
| 6 | 3.257866000  | 1.430040000  | 0.472288000  | 6 | -0.131319000  | 3.537527000  | 0.316686000  |
| 6 | 4.191659000  | 0.480051000  | 0.366688000  | 6 | 1.126199000   | 4.081504000  | 0.221001000  |
| 6 | 4.133269000  | -0.948957000 | 0.082397000  | 6 | 2.386922000   | 3.481324000  | -0.068516000 |
| 6 | 5.572100000  | -1.074507000 | 0.007046000  | 6 | 3.061518000   | 4.782395000  | -0.102609000 |
| 6 | 5.680369000  | 0.413953000  | 0.290002000  | 6 | 1.721232000   | 5.429674000  | 0.197730000  |
| 6 | 6.584607000  | 1.421394000  | 0.362627000  | 6 | 1.149601000   | 6.657397000  | 0.348820000  |
| 6 | 6.127517000  | 2.723587000  | 0.936192000  | 6 | -0.209668000  | 6.723865000  | 0.959726000  |
| 6 | 5.621660000  | 2.765726000  | 2.240858000  | 6 | -0.451337000  | 6.116386000  | 2.199094000  |
| 1 | 5.546451000  | 1.836972000  | 2.808350000  | 1 | 0.361428000   | 5.581551000  | 2.692686000  |
| 6 | 5.207762000  | 3.960717000  | 2.818402000  | 6 | -1.699928000  | 6.177556000  | 2.807391000  |
| 1 | 4.807630000  | 4.001225000  | 3.832499000  | 1 | -1.892176000  | 5.702062000  | 3.770361000  |
| 6 | 5.297534000  | 5.122657000  | 2.071878000  | 6 | -2.720797000  | 6.854777000  | 2.163033000  |

|   |              |              |              |   |              |              |              |
|---|--------------|--------------|--------------|---|--------------|--------------|--------------|
| 6 | 5.780439000  | 5.126965000  | 0.771995000  | 6 | -2.531422000 | 7.463989000  | 0.931470000  |
| 1 | 5.791181000  | 6.063415000  | 0.213188000  | 1 | -3.376489000 | 7.951255000  | 0.444789000  |
| 6 | 6.205054000  | 3.923340000  | 0.217782000  | 6 | -1.272093000 | 7.401300000  | 0.344227000  |
| 1 | 6.588020000  | 3.908856000  | -0.804723000 | 1 | -1.109948000 | 7.875024000  | -0.626185000 |
| 6 | 7.990483000  | 1.363392000  | -0.096412000 | 6 | 1.753391000  | 7.937092000  | -0.076429000 |
| 6 | 8.990321000  | 2.110000000  | 0.546557000  | 6 | 1.497361000  | 9.129105000  | 0.622676000  |
| 1 | 8.727376000  | 2.714895000  | 1.415784000  | 1 | 0.865090000  | 9.098483000  | 1.511499000  |
| 6 | 10.309235000 | 2.090267000  | 0.107157000  | 6 | 2.036558000  | 10.344211000 | 0.216238000  |
| 1 | 11.090802000 | 2.661795000  | 0.610694000  | 1 | 1.844664000  | 11.268518000 | 0.764115000  |
| 6 | 10.633977000 | 1.321458000  | -0.999739000 | 6 | 2.841733000  | 10.376979000 | -0.912124000 |
| 6 | 9.674094000  | 0.581972000  | -1.672951000 | 6 | 3.109120000  | 9.227915000  | -1.639718000 |
| 1 | 9.965037000  | -0.009484000 | -2.542181000 | 1 | 3.741186000  | 9.290394000  | -2.526856000 |
| 6 | 8.360291000  | 0.610909000  | -1.221029000 | 6 | 2.559037000  | 8.021246000  | -1.223477000 |
| 1 | 7.596231000  | 0.037692000  | -1.746695000 | 1 | 2.752107000  | 7.115529000  | -1.799141000 |
| 6 | 6.414827000  | -2.146828000 | -0.201959000 | 6 | 4.374964000  | 5.123289000  | -0.274169000 |
| 6 | 7.842736000  | -2.157573000 | 0.159468000  | 6 | 4.956662000  | 6.430579000  | 0.094965000  |
| 6 | 8.330840000  | -1.469780000 | 1.285631000  | 6 | 4.523436000  | 7.135320000  | 1.229782000  |
| 1 | 7.628007000  | -0.911178000 | 1.904685000  | 1 | 3.728302000  | 6.709158000  | 1.842287000  |
| 6 | 9.677189000  | -1.488969000 | 1.633181000  | 6 | 5.085123000  | 8.355280000  | 1.589549000  |
| 1 | 10.047736000 | -0.947119000 | 2.505163000  | 1 | 4.741740000  | 8.904277000  | 2.467773000  |
| 6 | 10.564110000 | -2.222546000 | 0.861748000  | 6 | 6.108301000  | 8.880175000  | 0.816284000  |
| 6 | 10.128747000 | -2.934531000 | -0.246265000 | 6 | 6.581203000  | 8.210663000  | -0.302549000 |
| 1 | 10.851589000 | -3.503734000 | -0.834123000 | 1 | 7.389927000  | 8.651662000  | -0.888165000 |
| 6 | 8.782179000  | -2.896705000 | -0.587017000 | 6 | 6.006202000  | 6.994605000  | -0.651857000 |
| 1 | 8.441971000  | -3.450252000 | -1.463847000 | 1 | 6.373558000  | 6.465599000  | -1.532829000 |
| 6 | 5.841523000  | -3.411498000 | -0.733288000 | 6 | 5.315588000  | 4.097285000  | -0.805160000 |
| 6 | 4.958043000  | -3.409760000 | -1.825018000 | 6 | 5.001240000  | 3.354716000  | -1.952034000 |
| 1 | 4.683410000  | -2.457357000 | -2.280411000 | 1 | 4.049827000  | 3.533175000  | -2.454735000 |
| 6 | 4.421150000  | -4.586335000 | -2.336351000 | 6 | 5.870088000  | 2.393819000  | -2.458650000 |
| 1 | 3.727207000  | -4.577492000 | -3.178406000 | 1 | 5.619706000  | 1.806468000  | -3.343225000 |
| 6 | 4.773454000  | -5.793166000 | -1.755208000 | 6 | 7.074440000  | 2.172728000  | -1.812090000 |
| 6 | 5.642667000  | -5.847781000 | -0.676400000 | 6 | 7.429707000  | 2.886521000  | -0.676265000 |
| 1 | 5.875601000  | -6.814114000 | -0.227846000 | 1 | 8.374600000  | 2.661884000  | -0.181581000 |
| 6 | 6.167505000  | -4.661126000 | -0.176899000 | 6 | 6.550041000  | 3.844275000  | -0.185801000 |
| 1 | 6.843669000  | -4.699221000 | 0.679426000  | 1 | 6.818499000  | 4.404312000  | 0.712293000  |
| 6 | 3.028000000  | -1.772412000 | 0.015674000  | 6 | 2.743752000  | 2.149805000  | -0.163023000 |

|   |              |               |              |   |               |               |              |
|---|--------------|---------------|--------------|---|---------------|---------------|--------------|
| 6 | 1.962078000  | -2.390608000  | -0.004182000 | 6 | 2.920116000   | 0.928708000   | -0.175959000 |
| 6 | 0.746630000  | -2.989563000  | 0.004408000  | 6 | 3.034013000   | -0.415192000  | -0.155928000 |
| 6 | -0.381389000 | -3.473689000  | 0.029013000  | 6 | 3.061603000   | -1.649433000  | -0.103224000 |
| 9 | -5.399383000 | -10.648224000 | -1.770737000 | 9 | 7.733392000   | -9.094797000  | -1.687131000 |
| 9 | -7.285343000 | -9.383634000  | 2.247449000  | 9 | 6.005545000   | -10.047569000 | 2.639496000  |
| 9 | -8.599391000 | -0.185860000  | 0.723335000  | 9 | -3.011730000  | -8.147538000  | 0.721517000  |
| 9 | -8.278187000 | 1.224722000   | -1.836834000 | 9 | -4.092453000  | -7.146733000  | -1.998368000 |
| 9 | -6.430160000 | 9.844144000   | 2.081256000  | 9 | -11.644977000 | -2.584835000  | 1.637458000  |
| 9 | -4.533447000 | 10.678103000  | -2.609785000 | 9 | -11.874358000 | 0.181687000   | -2.162986000 |
| 9 | 4.088223000  | 7.876409000   | -0.110810000 | 9 | -5.617840000  | 6.739915000   | 0.279879000  |
| 9 | 4.895075000  | 6.281277000   | 2.625834000  | 9 | -3.930391000  | 6.915541000   | 2.748433000  |
| 9 | 11.903116000 | 1.304484000   | -1.436250000 | 9 | 3.360917000   | 11.548279000  | -1.314981000 |
| 9 | 11.866439000 | -2.257228000  | 1.199715000  | 9 | 6.663004000   | 10.053493000  | 1.163590000  |
| 9 | 4.262708000  | -6.936806000  | -2.249820000 | 9 | 7.920075000   | 1.250968000   | -2.299533000 |
| 6 | -0.602025000 | -6.751294000  | -0.043128000 | 6 | 6.040393000   | -3.114550000  | -0.102964000 |
| 6 | 0.089223000  | -7.427962000  | -1.059946000 | 6 | 6.987663000   | -2.819556000  | -1.096426000 |
| 6 | 0.109960000  | -6.404451000  | 1.112202000  | 6 | 5.966317000   | -2.251971000  | 0.999521000  |
| 6 | 1.436258000  | -7.745463000  | -0.935099000 | 6 | 7.831839000   | -1.719681000  | -0.995497000 |
| 1 | -0.441683000 | -7.700058000  | -1.974590000 | 1 | 7.058730000   | -3.467973000  | -1.972004000 |
| 6 | 1.456829000  | -6.721135000  | 1.258131000  | 6 | 6.805649000   | -1.149139000  | 1.119649000  |
| 1 | -0.405652000 | -5.876045000  | 1.915446000  | 1 | 5.234141000   | -2.454943000  | 1.782186000  |
| 6 | 2.099124000  | -7.394591000  | 0.233167000  | 6 | 7.735438000   | -0.905169000  | 0.123162000  |
| 1 | 1.992375000  | -8.241297000  | -1.730963000 | 1 | 8.554835000   | -1.472019000  | -1.773447000 |
| 1 | 2.016525000  | -6.446190000  | 2.153085000  | 1 | 6.746100000   | -0.475745000  | 1.975834000  |
| 9 | 3.388963000  | -7.726291000  | 0.377450000  | 9 | 8.571356000   | 0.138665000   | 0.247910000  |

**3d**

**Cam-b3lyp/def2-SVP**

**0 1**

|   |              |             |              |
|---|--------------|-------------|--------------|
| 6 | -2.345843000 | 3.434019000 | -0.080505000 |
| 6 | -1.093098000 | 4.020902000 | 0.043011000  |
| 6 | -1.691137000 | 5.358128000 | 0.315576000  |
| 6 | -3.037570000 | 4.744165000 | 0.034851000  |
| 6 | -4.288712000 | 5.181698000 | -0.229235000 |
| 6 | -4.557419000 | 6.612501000 | -0.533219000 |
| 6 | -5.611815000 | 7.306684000 | 0.073869000  |

**3d**

**Cam-b3lyp/def2-SVP**

**0 3**

|   |              |             |              |
|---|--------------|-------------|--------------|
| 6 | -2.252602000 | 3.507969000 | -0.033554000 |
| 6 | -0.977571000 | 4.052473000 | 0.071214000  |
| 6 | -1.518173000 | 5.405945000 | 0.348019000  |
| 6 | -2.891744000 | 4.845160000 | 0.087166000  |
| 6 | -4.126949000 | 5.327442000 | -0.172672000 |
| 6 | -4.349491000 | 6.766526000 | -0.475196000 |
| 6 | -5.378605000 | 7.493913000 | 0.136288000  |

|   |              |              |              |   |              |              |              |
|---|--------------|--------------|--------------|---|--------------|--------------|--------------|
| 1 | -6.231826000 | 6.801550000  | 0.816720000  | 1 | -6.011688000 | 7.008314000  | 0.881217000  |
| 6 | -5.870918000 | 8.634996000  | -0.237360000 | 6 | -5.596529000 | 8.829948000  | -0.173660000 |
| 1 | -6.673396000 | 9.179931000  | 0.260774000  | 1 | -6.379729000 | 9.399900000  | 0.327158000  |
| 6 | -5.085164000 | 9.279699000  | -1.189899000 | 6 | -4.794397000 | 9.449545000  | -1.129191000 |
| 6 | -4.050697000 | 8.605820000  | -1.829933000 | 6 | -3.784516000 | 8.743166000  | -1.773362000 |
| 1 | -3.454250000 | 9.119521000  | -2.584738000 | 1 | -3.174853000 | 9.237844000  | -2.530316000 |
| 6 | -3.790698000 | 7.281604000  | -1.494518000 | 6 | -3.565720000 | 7.411124000  | -1.439397000 |
| 1 | -2.983335000 | 6.748613000  | -1.999295000 | 1 | -2.777715000 | 6.852824000  | -1.947409000 |
| 6 | -1.243126000 | 6.488268000  | 0.903690000  | 6 | -1.015624000 | 6.530087000  | 0.910230000  |
| 6 | -2.177975000 | 7.452697000  | 1.547019000  | 6 | -1.900775000 | 7.530480000  | 1.566714000  |
| 6 | -3.074771000 | 7.015431000  | 2.527873000  | 6 | -2.805405000 | 7.129024000  | 2.556085000  |
| 1 | -3.104698000 | 5.956791000  | 2.791205000  | 1 | -2.876095000 | 6.072176000  | 2.818586000  |
| 6 | -3.917003000 | 7.907833000  | 3.182718000  | 6 | -3.603330000 | 8.053999000  | 3.220905000  |
| 1 | -4.610042000 | 7.562873000  | 3.950900000  | 1 | -4.302048000 | 7.736283000  | 3.995665000  |
| 6 | -3.874083000 | 9.256226000  | 2.845686000  | 6 | -3.507665000 | 9.400334000  | 2.886446000  |
| 6 | -2.982923000 | 9.719727000  | 1.880803000  | 6 | -2.607608000 | 9.828659000  | 1.913531000  |
| 1 | -2.965866000 | 10.779498000 | 1.624541000  | 1 | -2.548786000 | 10.887471000 | 1.659493000  |
| 6 | -2.133060000 | 8.820107000  | 1.250214000  | 6 | -1.802558000 | 8.896009000  | 1.272400000  |
| 1 | -1.428380000 | 9.185023000  | 0.500511000  | 1 | -1.091487000 | 9.233239000  | 0.515814000  |
| 6 | 0.204997000  | 6.782041000  | 1.039220000  | 6 | 0.444285000  | 6.777623000  | 0.997378000  |
| 6 | 0.711195000  | 7.309769000  | 2.236902000  | 6 | 1.005562000  | 7.307574000  | 2.169431000  |
| 1 | 0.035716000  | 7.484708000  | 3.075863000  | 1 | 0.363641000  | 7.515406000  | 3.027033000  |
| 6 | 2.059269000  | 7.606607000  | 2.379314000  | 6 | 2.365890000  | 7.565524000  | 2.263248000  |
| 1 | 2.447693000  | 8.007244000  | 3.316257000  | 1 | 2.796608000  | 7.968273000  | 3.180603000  |
| 6 | 2.920692000  | 7.397027000  | 1.305260000  | 6 | 3.185044000  | 7.313431000  | 1.165563000  |
| 6 | 2.446817000  | 6.887241000  | 0.101481000  | 6 | 2.657160000  | 6.799207000  | -0.013661000 |
| 1 | 3.126766000  | 6.753261000  | -0.739138000 | 1 | 3.304204000  | 6.630318000  | -0.873965000 |
| 6 | 1.095763000  | 6.580110000  | -0.021584000 | 6 | 1.294218000  | 6.531699000  | -0.087909000 |
| 1 | 0.721678000  | 6.201059000  | -0.973954000 | 1 | 0.878406000  | 6.149289000  | -1.021433000 |
| 6 | 0.170869000  | 3.429217000  | -0.020222000 | 6 | 0.267733000  | 3.408623000  | -0.007153000 |
| 6 | 1.197528000  | 2.771145000  | -0.110987000 | 6 | 1.263860000  | 2.711009000  | -0.110361000 |
| 6 | 2.291767000  | 1.964422000  | -0.199434000 | 6 | 2.330451000  | 1.861496000  | -0.212542000 |
| 6 | 3.228975000  | 1.181999000  | -0.261265000 | 6 | 3.241934000  | 1.049683000  | -0.282818000 |
| 6 | 4.222028000  | 0.198133000  | -0.271359000 | 6 | 4.205152000  | 0.038635000  | -0.295905000 |
| 6 | 4.140032000  | -1.171273000 | -0.071540000 | 6 | 4.077503000  | -1.362453000 | -0.070895000 |
| 6 | 5.616708000  | -1.337384000 | -0.191230000 | 6 | 5.557364000  | -1.534445000 | -0.181231000 |

|   |              |              |              |   |              |              |              |
|---|--------------|--------------|--------------|---|--------------|--------------|--------------|
| 6 | 5.705180000  | 0.168198000  | -0.335926000 | 6 | 5.661457000  | -0.035182000 | -0.346512000 |
| 6 | 6.608391000  | 1.173149000  | -0.411575000 | 6 | 6.599206000  | 0.959973000  | -0.432541000 |
| 6 | 6.152685000  | 2.511971000  | -0.883864000 | 6 | 6.176943000  | 2.277503000  | -0.977784000 |
| 6 | 5.511584000  | 2.626595000  | -2.122719000 | 6 | 5.524953000  | 2.341569000  | -2.216032000 |
| 1 | 5.308278000  | 1.726316000  | -2.705451000 | 1 | 5.302942000  | 1.417366000  | -2.752481000 |
| 6 | 5.158372000  | 3.867713000  | -2.639890000 | 6 | 5.180964000  | 3.560017000  | -2.788502000 |
| 1 | 4.676463000  | 3.951918000  | -3.614430000 | 1 | 4.689239000  | 3.602979000  | -3.760808000 |
| 6 | 5.441241000  | 5.012261000  | -1.904376000 | 6 | 5.481608000  | 4.735581000  | -2.110338000 |
| 6 | 6.054593000  | 4.928876000  | -0.656318000 | 6 | 6.109126000  | 4.705046000  | -0.866975000 |
| 1 | 6.238463000  | 5.836094000  | -0.080704000 | 1 | 6.307093000  | 5.635967000  | -0.335438000 |
| 6 | 6.416654000  | 3.682245000  | -0.160977000 | 6 | 6.462269000  | 3.479676000  | -0.315893000 |
| 1 | 6.915180000  | 3.616127000  | 0.808061000  | 1 | 6.965030000  | 3.454815000  | 0.652752000  |
| 6 | 8.043021000  | 1.045732000  | -0.072552000 | 6 | 8.005389000  | 0.819746000  | -0.013377000 |
| 6 | 9.014764000  | 1.780554000  | -0.768635000 | 6 | 9.025519000  | 1.545810000  | -0.650309000 |
| 1 | 8.711427000  | 2.438047000  | -1.584786000 | 1 | 8.778513000  | 2.201642000  | -1.486302000 |
| 6 | 10.362439000 | 1.674756000  | -0.452748000 | 6 | 10.350017000 | 1.432599000  | -0.251591000 |
| 1 | 11.113467000 | 2.236823000  | -1.008803000 | 1 | 11.137123000 | 1.988798000  | -0.761741000 |
| 6 | 10.757206000 | 0.835828000  | 0.586333000  | 6 | 10.675352000 | 0.593697000  | 0.811567000  |
| 6 | 9.812017000  | 0.116176000  | 1.311456000  | 6 | 9.682962000  | -0.122732000 | 1.475288000  |
| 1 | 10.134385000 | -0.524898000 | 2.132378000  | 1 | 9.950434000  | -0.765092000 | 2.314767000  |
| 6 | 8.467470000  | 0.226325000  | 0.981365000  | 6 | 8.362675000  | -0.005904000 | 1.063040000  |
| 1 | 7.726785000  | -0.328353000 | 1.558972000  | 1 | 7.586071000  | -0.556712000 | 1.595244000  |
| 6 | 6.405531000  | -2.424266000 | -0.339969000 | 6 | 6.339443000  | -2.628120000 | -0.327419000 |
| 6 | 7.823001000  | -2.360732000 | -0.780122000 | 6 | 7.757940000  | -2.570868000 | -0.766011000 |
| 6 | 8.221667000  | -1.563599000 | -1.857764000 | 6 | 8.159309000  | -1.782725000 | -1.849316000 |
| 1 | 7.478517000  | -0.962431000 | -2.383291000 | 1 | 7.418579000  | -1.182297000 | -2.379173000 |
| 6 | 9.547438000  | -1.529093000 | -2.274869000 | 6 | 9.484519000  | -1.758036000 | -2.269065000 |
| 1 | 9.852406000  | -0.903746000 | -3.114337000 | 1 | 9.790990000  | -1.141554000 | -3.114586000 |
| 6 | 10.495064000 | -2.299306000 | -1.609097000 | 6 | 10.429192000 | -2.528940000 | -1.599718000 |
| 6 | 10.121478000 | -3.119445000 | -0.546743000 | 6 | 10.053498000 | -3.337650000 | -0.529432000 |
| 1 | 10.874259000 | -3.723776000 | -0.039498000 | 1 | 10.804038000 | -3.941806000 | -0.018678000 |
| 6 | 8.792320000  | -3.153344000 | -0.148638000 | 6 | 8.724748000  | -3.361844000 | -0.128939000 |
| 1 | 8.500105000  | -3.801545000 | 0.679608000  | 1 | 8.430500000  | -4.002402000 | 0.704566000  |
| 6 | 5.873177000  | -3.799740000 | -0.128668000 | 6 | 5.795145000  | -3.999339000 | -0.123300000 |
| 6 | 5.191838000  | -4.169118000 | 1.035369000  | 6 | 5.081049000  | -4.360831000 | 1.023715000  |
| 1 | 5.015413000  | -3.426243000 | 1.815211000  | 1 | 4.893427000  | -3.615725000 | 1.798615000  |

|   |              |               |              |   |              |               |              |
|---|--------------|---------------|--------------|---|--------------|---------------|--------------|
| 6 | 4.761474000  | -5.479022000  | 1.234329000  | 6 | 4.629502000  | -5.665177000  | 1.211150000  |
| 1 | 4.247740000  | -5.767366000  | 2.151762000  | 1 | 4.088886000  | -5.946902000  | 2.115100000  |
| 6 | 5.010619000  | -6.432011000  | 0.252791000  | 6 | 4.889897000  | -6.620971000  | 0.235109000  |
| 6 | 5.672634000  | -6.088447000  | -0.923575000 | 6 | 5.586552000  | -6.285949000  | -0.923411000 |
| 1 | 5.854584000  | -6.847825000  | -1.684760000 | 1 | 5.777592000  | -7.047241000  | -1.680449000 |
| 6 | 6.106213000  | -4.783298000  | -1.101412000 | 6 | 6.040834000  | -4.986238000  | -1.089727000 |
| 1 | 6.641694000  | -4.518875000  | -2.014951000 | 1 | 6.601043000  | -4.728553000  | -1.990206000 |
| 6 | 3.012426000  | -1.974434000  | 0.113751000  | 6 | 2.962037000  | -2.120056000  | 0.111148000  |
| 6 | 1.937729000  | -2.542560000  | 0.245229000  | 6 | 1.843598000  | -2.662652000  | 0.246292000  |
| 6 | 0.695043000  | -3.093539000  | 0.325685000  | 6 | 0.625876000  | -3.158889000  | 0.335956000  |
| 6 | -0.453576000 | -3.512553000  | 0.325337000  | 6 | -0.569048000 | -3.561466000  | 0.342071000  |
| 6 | -1.801412000 | -3.848371000  | 0.174427000  | 6 | -1.870529000 | -3.827640000  | 0.242032000  |
| 6 | -2.861210000 | -3.072024000  | -0.265431000 | 6 | -3.002486000 | -2.958359000  | -0.199830000 |
| 6 | -3.790772000 | -4.230301000  | -0.284037000 | 6 | -3.896928000 | -4.091935000  | -0.249043000 |
| 6 | -2.636002000 | -5.077087000  | 0.217537000  | 6 | -2.783346000 | -4.995664000  | 0.239779000  |
| 6 | -2.328153000 | -6.349148000  | 0.559710000  | 6 | -2.525326000 | -6.296356000  | 0.531300000  |
| 6 | -1.069483000 | -6.600373000  | 1.316597000  | 6 | -1.272989000 | -6.615675000  | 1.272765000  |
| 6 | -0.800879000 | -5.881539000  | 2.487431000  | 6 | -1.005583000 | -5.986957000  | 2.494948000  |
| 1 | -1.511885000 | -5.126700000  | 2.827783000  | 1 | -1.710635000 | -5.250187000  | 2.883506000  |
| 6 | 0.342528000  | -6.127445000  | 3.238584000  | 6 | 0.132655000  | -6.294755000  | 3.229132000  |
| 1 | 0.539860000  | -5.571320000  | 4.155561000  | 1 | 0.329773000  | -5.810246000  | 4.185936000  |
| 6 | 1.236587000  | -7.102745000  | 2.813009000  | 6 | 1.025561000  | -7.238601000  | 2.733094000  |
| 6 | 0.999025000  | -7.830670000  | 1.649188000  | 6 | 0.790219000  | -7.874986000  | 1.517015000  |
| 1 | 1.721496000  | -8.576728000  | 1.320277000  | 1 | 1.512915000  | -8.594447000  | 1.133290000  |
| 6 | -0.154988000 | -7.583226000  | 0.916574000  | 6 | -0.361952000 | -7.569007000  | 0.802092000  |
| 1 | -0.346777000 | -8.160310000  | 0.009888000  | 1 | -0.552583000 | -8.074102000  | -0.146907000 |
| 6 | -3.163209000 | -7.528475000  | 0.240258000  | 6 | -3.400160000 | -7.430684000  | 0.174994000  |
| 6 | -3.294225000 | -8.585122000  | 1.153270000  | 6 | -3.534854000 | -8.531405000  | 1.035536000  |
| 1 | -2.786477000 | -8.529637000  | 2.117741000  | 1 | -2.992800000 | -8.543583000  | 1.982545000  |
| 6 | -4.073836000 | -9.696264000  | 0.860954000  | 6 | -4.362228000 | -9.598813000  | 0.714867000  |
| 1 | -4.185440000 | -10.507250000 | 1.581454000  | 1 | -4.477403000 | -10.442272000 | 1.396449000  |
| 6 | -4.722451000 | -9.772002000  | -0.369431000 | 6 | -5.054988000 | -9.588684000  | -0.493918000 |
| 6 | -4.584121000 | -8.752107000  | -1.306104000 | 6 | -4.911483000 | -8.527125000  | -1.382788000 |
| 1 | -5.085574000 | -8.832420000  | -2.270845000 | 1 | -5.446117000 | -8.541380000  | -2.332833000 |
| 6 | -3.808625000 | -7.641809000  | -0.997529000 | 6 | -4.091496000 | -7.459046000  | -1.043858000 |
| 1 | -3.692753000 | -6.846340000  | -1.734912000 | 1 | -3.974634000 | -6.630980000  | -1.744120000 |

|    |              |              |              |    |              |              |              |
|----|--------------|--------------|--------------|----|--------------|--------------|--------------|
| 6  | -5.107371000 | -4.297837000 | -0.585560000 | 6  | -5.241510000 | -4.131286000 | -0.562613000 |
| 6  | -5.993832000 | -5.437442000 | -0.259351000 | 6  | -6.153044000 | -5.222927000 | -0.194999000 |
| 6  | -5.902536000 | -6.098319000 | 0.971691000  | 6  | -6.007575000 | -5.923120000 | 1.012976000  |
| 1  | -5.160888000 | -5.769422000 | 1.700813000  | 1  | -5.203816000 | -5.648116000 | 1.696694000  |
| 6  | -6.746003000 | -7.156946000 | 1.284249000  | 6  | -6.877142000 | -6.946340000 | 1.362661000  |
| 1  | -6.668367000 | -7.668357000 | 2.243953000  | 1  | -6.757564000 | -7.483201000 | 2.303928000  |
| 6  | -7.698870000 | -7.569416000 | 0.357742000  | 6  | -7.909906000 | -7.294736000 | 0.495891000  |
| 6  | -7.826516000 | -6.916012000 | -0.865809000 | 6  | -8.091599000 | -6.606113000 | -0.702117000 |
| 1  | -8.584113000 | -7.245122000 | -1.577841000 | 1  | -8.908964000 | -6.886071000 | -1.367510000 |
| 6  | -6.984611000 | -5.852080000 | -1.161101000 | 6  | -7.225933000 | -5.573772000 | -1.033190000 |
| 1  | -7.089436000 | -5.338511000 | -2.118464000 | 1  | -7.371138000 | -5.037536000 | -1.972268000 |
| 6  | -5.736257000 | -3.137154000 | -1.278682000 | 6  | -5.820306000 | -2.966074000 | -1.278025000 |
| 6  | -5.195812000 | -2.643817000 | -2.471383000 | 6  | -5.230851000 | -2.481195000 | -2.453442000 |
| 1  | -4.311034000 | -3.120985000 | -2.896861000 | 1  | -4.343208000 | -2.975741000 | -2.851708000 |
| 6  | -5.770618000 | -1.562687000 | -3.130297000 | 6  | -5.758524000 | -1.386349000 | -3.125233000 |
| 1  | -5.346284000 | -1.184876000 | -4.060998000 | 1  | -5.297812000 | -1.017598000 | -4.042146000 |
| 6  | -6.899580000 | -0.958208000 | -2.588915000 | 6  | -6.886985000 | -0.751549000 | -2.614157000 |
| 6  | -7.463744000 | -1.433543000 | -1.406413000 | 6  | -7.498071000 | -1.214482000 | -1.450925000 |
| 1  | -8.339409000 | -0.936622000 | -0.989508000 | 1  | -8.369400000 | -0.692985000 | -1.055578000 |
| 6  | -6.887731000 | -2.524261000 | -0.767916000 | 6  | -6.970739000 | -2.322450000 | -0.800060000 |
| 1  | -7.332332000 | -2.899706000 | 0.156010000  | 1  | -7.449312000 | -2.684434000 | 0.111981000  |
| 6  | -2.955085000 | -1.689171000 | -0.431936000 | 6  | -3.068481000 | -1.599409000 | -0.312113000 |
| 6  | -2.938522000 | -0.467451000 | -0.453669000 | 6  | -2.998843000 | -0.365316000 | -0.333525000 |
| 6  | -2.844838000 | 0.888809000  | -0.394158000 | 6  | -2.851843000 | 0.975647000  | -0.291053000 |
| 6  | -2.687817000 | 2.094955000  | -0.275728000 | 6  | -2.646995000 | 2.183124000  | -0.202380000 |
| 6  | -5.447247000 | 4.254207000  | -0.276277000 | 6  | -5.314236000 | 4.436747000  | -0.227035000 |
| 6  | -6.455297000 | 4.404436000  | -1.240536000 | 6  | -6.305139000 | 4.613556000  | -1.204448000 |
| 6  | -5.604876000 | 3.252487000  | 0.690423000  | 6  | -5.510839000 | 3.439567000  | 0.736994000  |
| 6  | -7.580751000 | 3.591824000  | -1.239238000 | 6  | -7.449547000 | 3.827954000  | -1.221116000 |
| 1  | -6.357107000 | 5.176735000  | -2.005277000 | 1  | -6.176963000 | 5.384039000  | -1.966626000 |
| 6  | -6.731388000 | 2.437463000  | 0.708855000  | 6  | -6.656723000 | 2.651516000  | 0.737605000  |
| 1  | -4.847754000 | 3.130809000  | 1.466463000  | 1  | -4.767593000 | 3.298338000  | 1.523007000  |
| 6  | -7.720915000 | 2.620957000  | -0.250636000 | 6  | -7.626242000 | 2.858223000  | -0.237292000 |
| 1  | -8.359358000 | 3.713160000  | -1.992661000 | 1  | -8.213831000 | 3.968645000  | -1.985788000 |
| 1  | -6.855111000 | 1.674925000  | 1.478383000  | 1  | -6.809637000 | 1.890954000  | 1.503840000  |
| 17 | -8.741167000 | -8.905256000 | 0.733633000  | 17 | -8.981264000 | -8.592541000 | 0.913924000  |

|    |              |               |              |    |              |               |              |
|----|--------------|---------------|--------------|----|--------------|---------------|--------------|
| 17 | -5.706734000 | -11.152223000 | -0.740448000 | 17 | -6.099450000 | -10.913387000 | -0.898574000 |
| 17 | -7.618172000 | 0.398247000   | -3.403770000 | 17 | -7.540659000 | 0.628602000   | -3.441039000 |
| 17 | -9.169776000 | 1.660675000   | -0.191915000 | 17 | -9.095961000 | 1.927770000   | -0.205444000 |
| 17 | -5.397542000 | 10.944482000  | -1.577092000 | 17 | -5.055644000 | 11.123409000  | -1.515744000 |
| 17 | -4.949124000 | 10.373927000  | 3.629924000  | 17 | -4.526205000 | 10.560028000  | 3.685059000  |
| 17 | 4.604443000  | 7.805609000   | 1.474664000  | 17 | 4.885088000  | 7.673934000   | 1.274099000  |
| 17 | 5.039083000  | 6.571460000   | -2.567311000 | 17 | 5.078767000  | 6.265286000   | -2.837658000 |
| 17 | 12.439929000 | 0.691258000   | 0.985462000  | 17 | 12.328217000 | 0.445729000   | 1.318509000  |
| 17 | 12.156378000 | -2.240811000  | -2.109070000 | 17 | 12.088978000 | -2.488269000  | -2.107290000 |
| 17 | 4.526720000  | -8.085693000  | 0.494839000  | 17 | 4.374412000  | -8.267669000  | 0.461817000  |
| 17 | 2.661622000  | -7.424426000  | 3.758956000  | 17 | 2.446316000  | -7.632844000  | 3.657164000  |

|                           |               |              |              |                           |             |              |              |
|---------------------------|---------------|--------------|--------------|---------------------------|-------------|--------------|--------------|
| <b>3d</b>                 |               |              |              | <b>3d</b>                 |             |              |              |
| <b>Cam-b3lyp/def2-SVP</b> |               |              |              | <b>Cam-b3lyp/def2-SVP</b> |             |              |              |
| <b>-2 1</b>               |               |              |              | <b>-2 3</b>               |             |              |              |
| 6                         | -4.176976000  | 0.514648000  | 0.080654000  | 6                         | 3.205056000 | -2.694158000 | -0.004298000 |
| 6                         | -3.774385000  | 1.855037000  | 0.121478000  | 6                         | 2.103289000 | -3.621875000 | 0.076317000  |
| 6                         | -5.177246000  | 2.311293000  | 0.287167000  | 6                         | 3.035635000 | -4.744473000 | 0.270185000  |
| 6                         | -5.604518000  | 0.883669000  | 0.076497000  | 6                         | 4.178384000 | -3.785604000 | 0.020053000  |
| 6                         | -6.764204000  | 0.224433000  | -0.190522000 | 6                         | 5.514564000 | -3.904924000 | -0.241483000 |
| 6                         | -7.971362000  | 0.950316000  | -0.660494000 | 6                         | 6.095954000 | -5.196765000 | -0.683936000 |
| 6                         | -9.252544000  | 0.656970000  | -0.169992000 | 6                         | 7.315654000 | -5.677166000 | -0.182359000 |
| 1                         | -9.364420000  | -0.101220000 | 0.607210000  | 1                         | 7.835955000 | -5.105061000 | 0.587869000  |
| 6                         | -10.379546000 | 1.321431000  | -0.636689000 | 6                         | 7.867988000 | -6.871765000 | -0.627106000 |
| 1                         | -11.366768000 | 1.103848000  | -0.227219000 | 1                         | 8.802291000 | -7.246169000 | -0.206722000 |
| 6                         | -10.239223000 | 2.289643000  | -1.626927000 | 6                         | 7.204954000 | -7.607104000 | -1.604923000 |
| 6                         | -8.987814000  | 2.590400000  | -2.150592000 | 6                         | 6.003829000 | -7.154393000 | -2.137347000 |
| 1                         | -8.893137000  | 3.342453000  | -2.935053000 | 1                         | 5.498993000 | -7.734638000 | -2.911046000 |
| 6                         | -7.868325000  | 1.922016000  | -1.666052000 | 6                         | 5.461944000 | -5.959125000 | -1.676586000 |
| 1                         | -6.886464000  | 2.147777000  | -2.084493000 | 1                         | 4.525742000 | -5.595467000 | -2.102504000 |
| 6                         | -5.767056000  | 3.446502000  | 0.735658000  | 6                         | 2.938699000 | -6.010023000 | 0.762853000  |
| 6                         | -7.149409000  | 3.428687000  | 1.290477000  | 6                         | 4.118338000 | -6.706984000 | 1.345246000  |
| 6                         | -7.499351000  | 2.517590000  | 2.294594000  | 6                         | 4.892893000 | -6.089580000 | 2.336258000  |
| 1                         | -6.754868000  | 1.799500000  | 2.641363000  | 1                         | 4.640978000 | -5.074622000 | 2.647101000  |
| 6                         | -8.769394000  | 2.516444000  | 2.863214000  | 6                         | 5.964853000 | -6.743897000 | 2.935279000  |
| 1                         | -9.031045000  | 1.802637000  | 3.645391000  | 1                         | 6.559831000 | -6.252111000 | 3.706095000  |

|   |               |             |              |   |              |              |              |
|---|---------------|-------------|--------------|---|--------------|--------------|--------------|
| 6 | -9.711854000  | 3.436844000 | 2.421921000  | 6 | 6.276256000  | -8.039424000 | 2.541015000  |
| 6 | -9.392365000  | 4.363556000 | 1.433743000  | 6 | 5.521887000  | -8.686290000 | 1.567251000  |
| 1 | -10.146554000 | 5.073109000 | 1.091416000  | 1 | 5.786550000  | -9.698454000 | 1.258841000  |
| 6 | -8.115571000  | 4.359336000 | 0.885997000  | 6 | 4.448761000  | -8.021082000 | 0.986617000  |
| 1 | -7.862193000  | 5.088464000 | 0.113950000  | 1 | 3.855292000  | -8.528616000 | 0.223719000  |
| 6 | -5.033316000  | 4.732930000 | 0.837956000  | 6 | 1.635382000  | -6.702940000 | 0.893824000  |
| 6 | -5.221578000  | 5.569859000 | 1.949897000  | 6 | 1.364580000  | -7.519458000 | 2.005476000  |
| 1 | -5.900865000  | 5.259231000 | 2.745475000  | 1 | 2.120476000  | -7.630553000 | 2.784519000  |
| 6 | -4.550145000  | 6.778701000 | 2.070243000  | 6 | 0.150337000  | -8.177351000 | 2.148137000  |
| 1 | -4.694474000  | 7.414217000 | 2.945018000  | 1 | -0.050150000 | -8.797324000 | 3.023186000  |
| 6 | -3.678373000  | 7.179864000 | 1.062063000  | 6 | -0.823137000 | -8.036437000 | 1.163823000  |
| 6 | -3.474920000  | 6.380233000 | -0.057499000 | 6 | -0.587682000 | -7.243996000 | 0.045635000  |
| 1 | -2.799126000  | 6.714207000 | -0.845096000 | 1 | -1.353183000 | -7.153539000 | -0.724989000 |
| 6 | -4.151394000  | 5.168565000 | -0.160962000 | 6 | 0.632163000  | -6.587434000 | -0.080323000 |
| 1 | -3.996843000  | 4.550025000 | -1.045749000 | 1 | 0.814822000  | -5.975373000 | -0.963882000 |
| 6 | -2.503926000  | 2.411594000 | 0.079616000  | 6 | 0.748354000  | -3.391684000 | 0.042130000  |
| 6 | -1.316681000  | 2.731504000 | 0.009315000  | 6 | -0.427628000 | -3.014759000 | -0.026383000 |
| 6 | 0.002496000   | 3.007925000 | -0.055566000 | 6 | -1.682098000 | -2.519203000 | -0.083303000 |
| 6 | 1.226112000   | 3.178947000 | -0.081372000 | 6 | -2.798557000 | -1.997288000 | -0.121088000 |
| 6 | 2.597744000   | 3.259066000 | -0.084490000 | 6 | -3.992986000 | -1.296416000 | -0.126649000 |
| 6 | 3.612948000   | 2.204695000 | 0.093600000  | 6 | -4.263438000 | 0.101403000  | 0.024795000  |
| 6 | 4.668044000   | 3.251065000 | -0.070692000 | 6 | -5.713890000 | -0.145960000 | -0.147834000 |
| 6 | 3.589293000   | 4.304486000 | -0.101507000 | 6 | -5.413640000 | -1.621061000 | -0.174288000 |
| 6 | 3.568278000   | 5.686036000 | -0.087388000 | 6 | -6.135893000 | -2.787486000 | -0.136362000 |
| 6 | 2.375051000   | 6.412951000 | -0.561918000 | 6 | -5.514439000 | -4.059850000 | -0.564635000 |
| 6 | 1.631956000   | 5.936159000 | -1.658393000 | 6 | -4.661969000 | -4.095592000 | -1.681068000 |
| 1 | 1.936956000   | 5.006320000 | -2.139427000 | 1 | -4.445277000 | -3.168688000 | -2.212999000 |
| 6 | 0.532125000   | 6.620505000 | -2.155198000 | 6 | -4.103745000 | -5.282222000 | -2.137109000 |
| 1 | -0.021461000  | 6.233173000 | -3.011780000 | 1 | -3.450075000 | -5.289405000 | -3.010219000 |
| 6 | 0.141249000   | 7.814208000 | -1.557868000 | 6 | -4.392388000 | -6.470546000 | -1.476046000 |
| 6 | 0.838496000   | 8.314186000 | -0.463303000 | 6 | -5.217913000 | -6.474455000 | -0.355905000 |
| 1 | 0.507047000   | 9.237277000 | 0.014080000  | 1 | -5.410408000 | -7.409923000 | 0.170570000  |
| 6 | 1.940954000   | 7.619099000 | 0.020214000  | 6 | -5.772744000 | -5.279226000 | 0.085556000  |
| 1 | 2.476554000   | 8.016859000 | 0.883899000  | 1 | -6.417198000 | -5.288360000 | 0.966420000  |
| 6 | 4.688058000   | 6.458089000 | 0.484327000  | 6 | -7.514030000 | -2.825441000 | 0.399012000  |
| 6 | 5.119465000   | 7.679490000 | -0.065802000 | 6 | -8.517233000 | -3.628006000 | -0.170157000 |

|   |             |              |              |   |               |              |              |
|---|-------------|--------------|--------------|---|---------------|--------------|--------------|
| 1 | 4.633976000 | 8.055169000  | -0.968181000 | 1 | -8.286769000  | -4.214795000 | -1.061098000 |
| 6 | 6.159641000 | 8.410828000  | 0.492616000  | 6 | -9.800353000  | -3.679295000 | 0.359162000  |
| 1 | 6.494568000 | 9.342559000  | 0.034270000  | 1 | -10.574125000 | -4.288263000 | -0.110283000 |
| 6 | 6.796824000 | 7.933678000  | 1.634340000  | 6 | -10.103561000 | -2.926927000 | 1.490217000  |
| 6 | 6.391860000 | 6.738395000  | 2.217036000  | 6 | -9.133085000  | -2.133520000 | 2.090743000  |
| 1 | 6.887265000 | 6.379484000  | 3.120643000  | 1 | -9.378530000  | -1.558157000 | 2.984606000  |
| 6 | 5.348477000 | 6.018616000  | 1.646381000  | 6 | -7.854700000  | -2.089761000 | 1.546305000  |
| 1 | 5.017745000 | 5.093224000  | 2.120219000  | 1 | -7.088485000  | -1.480961000 | 2.028235000  |
| 6 | 5.975488000 | 3.221131000  | -0.424632000 | 6 | -6.794604000  | 0.621968000  | -0.448660000 |
| 6 | 6.644536000 | 4.408333000  | -1.031836000 | 6 | -8.009056000  | 0.027597000  | -1.073792000 |
| 6 | 6.129837000 | 4.991162000  | -2.195540000 | 6 | -7.901380000  | -0.759328000 | -2.227497000 |
| 1 | 5.207474000 | 4.594773000  | -2.622467000 | 1 | -6.911700000  | -0.958120000 | -2.640978000 |
| 6 | 6.771174000 | 6.059422000  | -2.814597000 | 6 | -9.025701000  | -1.283689000 | -2.857608000 |
| 1 | 6.362265000 | 6.507956000  | -3.720858000 | 1 | -8.928919000  | -1.895731000 | -3.755322000 |
| 6 | 7.943490000 | 6.560552000  | -2.261314000 | 6 | -10.284050000 | -1.022455000 | -2.329733000 |
| 6 | 8.483137000 | 6.000593000  | -1.108353000 | 6 | -10.427652000 | -0.235908000 | -1.190828000 |
| 1 | 9.395391000 | 6.415434000  | -0.678213000 | 1 | -11.421403000 | -0.049785000 | -0.781733000 |
| 6 | 7.835980000 | 4.925271000  | -0.510282000 | 6 | -9.294556000  | 0.287938000  | -0.580414000 |
| 1 | 8.259086000 | 4.481813000  | 0.393083000  | 1 | -9.406286000  | 0.906111000  | 0.312517000  |
| 6 | 6.789058000 | 1.981971000  | -0.359614000 | 6 | -6.780102000  | 2.097917000  | -0.312835000 |
| 6 | 6.648392000 | 1.057311000  | 0.684420000  | 6 | -6.140123000  | 2.739979000  | 0.757856000  |
| 1 | 5.921012000 | 1.248891000  | 1.473223000  | 1 | -5.637300000  | 2.140137000  | 1.516780000  |
| 6 | 7.424332000 | -0.095905000 | 0.745017000  | 6 | -6.140763000  | 4.125405000  | 0.884189000  |
| 1 | 7.310246000 | -0.801873000 | 1.567542000  | 1 | -5.644950000  | 4.609245000  | 1.725841000  |
| 6 | 8.361462000 | -0.337837000 | -0.252823000 | 6 | -6.794788000  | 4.895664000  | -0.070960000 |
| 6 | 8.528335000 | 0.558427000  | -1.303733000 | 6 | -7.441603000  | 4.293486000  | -1.145497000 |
| 1 | 9.264001000 | 0.351489000  | -2.082183000 | 1 | -7.944690000  | 4.910993000  | -1.890993000 |
| 6 | 7.750610000 | 1.707849000  | -1.346061000 | 6 | -7.433637000  | 2.909554000  | -1.255944000 |
| 1 | 7.885028000 | 2.407563000  | -2.172320000 | 1 | -7.939081000  | 2.444155000  | -2.103535000 |
| 6 | 3.512315000 | 0.885963000  | 0.261125000  | 6 | -3.413088000  | 1.164058000  | 0.179899000  |
| 6 | 3.217880000 | -0.339798000 | 0.402455000  | 6 | -2.513489000  | 2.010138000  | 0.305161000  |
| 6 | 2.821098000 | -1.580742000 | 0.490074000  | 6 | -1.475514000  | 2.853487000  | 0.380052000  |
| 6 | 2.347409000 | -2.755727000 | 0.502665000  | 6 | -0.459134000  | 3.565139000  | 0.381984000  |
| 6 | 1.690341000 | -3.913236000 | 0.380542000  | 6 | 0.745967000   | 4.207906000  | 0.262665000  |
| 6 | 0.310355000 | -4.242651000 | 0.053692000  | 6 | 2.041149000   | 3.719445000  | -0.080307000 |
| 6 | 0.579238000 | -5.657012000 | -0.030167000 | 6 | 2.604037000   | 5.068135000  | -0.124484000 |

|   |              |               |              |   |              |              |              |
|---|--------------|---------------|--------------|---|--------------|--------------|--------------|
| 6 | 2.028993000  | -5.365708000  | 0.313110000  | 6 | 1.231689000  | 5.600990000  | 0.245040000  |
| 6 | 3.232965000  | -5.975998000  | 0.436258000  | 6 | 0.575087000  | 6.776628000  | 0.447276000  |
| 6 | 4.352872000  | -5.209845000  | 1.060165000  | 6 | -0.756680000 | 6.734679000  | 1.116764000  |
| 6 | 4.201133000  | -4.676478000  | 2.345260000  | 6 | -0.904094000 | 6.079449000  | 2.346176000  |
| 1 | 3.245572000  | -4.794203000  | 2.858339000  | 1 | -0.041275000 | 5.576382000  | 2.785293000  |
| 6 | 5.241145000  | -4.006444000  | 2.978639000  | 6 | -2.119459000 | 6.062410000  | 3.019814000  |
| 1 | 5.115147000  | -3.597739000  | 3.981779000  | 1 | -2.220219000 | 5.552172000  | 3.978359000  |
| 6 | 6.452903000  | -3.857278000  | 2.316071000  | 6 | -3.215120000 | 6.705287000  | 2.457595000  |
| 6 | 6.631590000  | -4.355886000  | 1.029147000  | 6 | -3.111231000 | 7.350076000  | 1.228586000  |
| 1 | 7.577666000  | -4.193756000  | 0.511881000  | 1 | -3.992136000 | 7.815035000  | 0.785179000  |
| 6 | 5.584794000  | -5.037146000  | 0.417277000  | 6 | -1.884011000 | 7.367697000  | 0.575048000  |
| 1 | 5.722999000  | -5.436040000  | -0.589768000 | 1 | -1.799648000 | 7.876414000  | -0.387468000 |
| 6 | 3.550287000  | -7.351565000  | -0.009141000 | 6 | 1.071001000  | 8.105224000  | 0.033096000  |
| 6 | 4.476037000  | -8.141810000  | 0.689415000  | 6 | 0.777582000  | 9.257356000  | 0.781649000  |
| 1 | 4.945226000  | -7.744421000  | 1.590959000  | 1 | 0.194067000  | 9.163018000  | 1.699007000  |
| 6 | 4.801816000  | -9.424694000  | 0.267122000  | 6 | 1.222891000  | 10.513815000 | 0.391027000  |
| 1 | 5.513371000  | -10.034461000 | 0.825452000  | 1 | 0.997554000  | 11.398042000 | 0.988933000  |
| 6 | 4.207194000  | -9.934542000  | -0.882379000 | 6 | 1.970745000  | 10.641025000 | -0.775384000 |
| 6 | 3.298410000  | -9.170959000  | -1.606656000 | 6 | 2.264667000  | 9.523828000  | -1.549487000 |
| 1 | 2.841229000  | -9.581189000  | -2.507538000 | 1 | 2.845419000  | 9.636415000  | -2.465622000 |
| 6 | 2.980772000  | -7.890495000  | -1.171002000 | 6 | 1.810533000  | 8.273872000  | -1.147481000 |
| 1 | 2.271533000  | -7.289309000  | -1.740589000 | 1 | 2.030325000  | 7.400610000  | -1.762493000 |
| 6 | -0.223424000 | -6.748838000  | -0.303139000 | 6 | 3.877483000  | 5.510795000  | -0.366100000 |
| 6 | 0.105960000  | -8.128788000  | 0.077530000  | 6 | 4.387961000  | 6.842041000  | 0.009480000  |
| 6 | 0.847020000  | -8.424076000  | 1.237330000  | 6 | 3.955843000  | 7.493626000  | 1.176355000  |
| 1 | 1.180613000  | -7.602118000  | 1.871761000  | 1 | 3.220328000  | 7.001762000  | 1.813732000  |
| 6 | 1.155750000  | -9.728437000  | 1.601927000  | 6 | 4.445717000  | 8.741820000  | 1.539638000  |
| 1 | 1.736534000  | -9.930227000  | 2.503144000  | 1 | 4.093058000  | 9.235418000  | 2.446010000  |
| 6 | 0.709269000  | -10.786370000 | 0.817510000  | 6 | 5.399736000  | 9.363164000  | 0.741015000  |
| 6 | -0.044917000 | -10.538726000 | -0.326096000 | 6 | 5.866928000  | 8.739037000  | -0.411855000 |
| 1 | -0.391080000 | -11.374096000 | -0.937050000 | 1 | 6.616695000  | 9.235072000  | -1.030016000 |
| 6 | -0.338290000 | -9.229746000  | -0.683140000 | 6 | 5.365686000  | 7.492769000  | -0.764323000 |
| 1 | -0.921659000 | -9.048029000  | -1.587338000 | 1 | 5.733230000  | 7.010581000  | -1.671691000 |
| 6 | -1.542593000 | -6.509192000  | -0.942823000 | 6 | 4.839810000  | 4.571036000  | -1.005689000 |
| 6 | -1.665308000 | -5.657823000  | -2.053226000 | 6 | 4.493214000  | 3.880132000  | -2.174943000 |
| 1 | -0.774704000 | -5.157001000  | -2.435918000 | 1 | 3.502208000  | 4.030627000  | -2.605828000 |

|                                        |               |               |              |                                        |               |              |              |
|----------------------------------------|---------------|---------------|--------------|----------------------------------------|---------------|--------------|--------------|
| 6                                      | -2.886136000  | -5.436374000  | -2.677832000 | 6                                      | 5.380085000   | 3.009804000  | -2.797539000 |
| 1                                      | -2.958634000  | -4.769846000  | -3.538185000 | 1                                      | 5.094280000   | 2.476240000  | -3.704654000 |
| 6                                      | -4.025429000  | -6.072558000  | -2.197268000 | 6                                      | 6.642365000   | 2.815496000  | -2.249390000 |
| 6                                      | -3.947519000  | -6.918405000  | -1.095218000 | 6                                      | 7.018904000   | 3.479612000  | -1.084909000 |
| 1                                      | -4.853054000  | -7.387617000  | -0.709790000 | 1                                      | 8.000422000   | 3.289643000  | -0.650142000 |
| 6                                      | -2.717036000  | -7.130094000  | -0.483911000 | 6                                      | 6.122281000   | 4.352698000  | -0.480009000 |
| 1                                      | -2.664311000  | -7.789355000  | 0.384856000  | 1                                      | 6.418284000   | 4.869899000  | 0.435110000  |
| 6                                      | -0.791165000  | -3.411122000  | -0.026220000 | 6                                      | 2.514518000   | 2.424795000  | -0.196415000 |
| 6                                      | -1.693984000  | -2.575290000  | -0.046178000 | 6                                      | 2.813331000   | 1.229363000  | -0.211358000 |
| 6                                      | -2.626016000  | -1.589783000  | -0.024785000 | 6                                      | 3.062579000   | -0.097468000 | -0.183719000 |
| 6                                      | -3.417393000  | -0.653367000  | 0.015858000  | 6                                      | 3.209442000   | -1.321432000 | -0.116743000 |
| 6                                      | -6.844775000  | -1.253773000  | -0.100714000 | 6                                      | 6.418906000   | -2.733729000 | -0.180646000 |
| 6                                      | -7.601754000  | -2.005729000  | -1.014362000 | 6                                      | 7.509490000   | -2.595012000 | -1.057036000 |
| 6                                      | -6.199707000  | -1.950582000  | 0.932243000  | 6                                      | 6.249349000   | -1.736322000 | 0.793838000  |
| 6                                      | -7.720137000  | -3.384833000  | -0.900484000 | 6                                      | 8.395284000   | -1.529240000 | -0.959528000 |
| 1                                      | -8.105781000  | -1.497056000  | -1.838052000 | 1                                      | 7.665918000   | -3.341312000 | -1.837698000 |
| 6                                      | -6.308795000  | -3.330608000  | 1.058706000  | 6                                      | 7.126489000   | -0.664082000 | 0.903053000  |
| 1                                      | -5.612175000  | -1.396880000  | 1.665072000  | 1                                      | 5.417940000   | -1.812681000 | 1.494746000  |
| 6                                      | -7.081685000  | -4.041135000  | 0.147947000  | 6                                      | 8.206329000   | -0.572253000 | 0.032396000  |
| 1                                      | -8.302265000  | -3.958541000  | -1.622213000 | 1                                      | 9.233574000   | -1.434036000 | -1.650801000 |
| 1                                      | -5.802130000  | -3.856253000  | 1.868651000  | 1                                      | 6.979217000   | 0.096855000  | 1.670261000  |
| 17                                     | 1.084760000   | -12.432204000 | 1.274735000  | 17                                     | 6.024332000   | 10.930279000 | 1.192980000  |
| 17                                     | 4.615305000   | -11.542055000 | -1.425780000 | 17                                     | 2.533008000   | 12.216083000 | -1.275886000 |
| 17                                     | -5.561761000  | -5.810537000  | -2.988768000 | 17                                     | 7.764373000   | 1.734981000  | -3.034426000 |
| 17                                     | -7.280274000  | -5.763035000  | 0.337154000  | 17                                     | 9.352599000   | 0.735357000  | 0.201899000  |
| 17                                     | -11.650090000 | 3.135858000   | -2.213112000 | 17                                     | 7.886982000   | -9.117372000 | -2.162065000 |
| 17                                     | -11.317227000 | 3.428099000   | 3.108725000  | 17                                     | 7.636191000   | -8.862826000 | 3.267644000  |
| 17                                     | -2.849575000  | 8.706365000   | 1.210125000  | 17                                     | -2.345062000  | -8.874635000 | 1.340004000  |
| 17                                     | -1.236792000  | 8.687158000   | -2.191608000 | 17                                     | -3.716221000  | -7.970338000 | -2.064302000 |
| 17                                     | 8.117535000   | 8.842471000   | 2.336583000  | 17                                     | -11.718313000 | -2.979732000 | 2.158474000  |
| 17                                     | 8.743595000   | 7.918447000   | -3.015786000 | 17                                     | -11.702055000 | -1.693623000 | -3.099007000 |
| 17                                     | 9.360044000   | -1.771325000  | -0.189839000 | 17                                     | -6.827554000  | 6.637139000  | 0.076662000  |
| 17                                     | 7.770128000   | -3.037633000  | 3.119822000  | 17                                     | -4.738455000  | 6.706573000  | 3.313220000  |
| <b>3m</b><br><b>Cam-b3lyp/def2-SVP</b> |               |               |              | <b>3m</b><br><b>Cam-b3lyp/def2-SVP</b> |               |              |              |

**0 1**

|   |              |              |              |
|---|--------------|--------------|--------------|
| 6 | 0.235699000  | 4.225317000  | 0.000088000  |
| 6 | 1.587597000  | 3.922855000  | 0.000074000  |
| 6 | 1.970242000  | 5.359268000  | -0.000211000 |
| 6 | 0.501722000  | 5.687851000  | -0.000137000 |
| 6 | -0.238467000 | 6.791428000  | -0.000269000 |
| 6 | 3.110291000  | 6.042134000  | -0.000302000 |
| 6 | 2.254830000  | 2.694789000  | 0.000153000  |
| 6 | 2.721957000  | 1.566246000  | 0.000153000  |
| 6 | 3.129273000  | 0.265894000  | 0.000149000  |
| 6 | 3.389379000  | -0.927492000 | 0.000121000  |
| 6 | 3.541592000  | -2.316794000 | -0.000073000 |
| 6 | 2.603557000  | -3.336206000 | -0.000071000 |
| 6 | 3.656104000  | -4.385924000 | -0.000212000 |
| 6 | 4.675047000  | -3.278577000 | -0.000163000 |
| 6 | 6.000963000  | -3.189534000 | 0.000088000  |
| 6 | 3.677322000  | -5.714627000 | -0.000433000 |
| 6 | 1.206420000  | -3.299825000 | 0.000254000  |
| 6 | -0.004470000 | -3.139906000 | 0.000567000  |
| 6 | -1.334263000 | -2.842476000 | 0.000193000  |
| 6 | -2.497826000 | -2.471074000 | 0.000024000  |
| 6 | -3.777211000 | -1.908482000 | 0.000024000  |
| 6 | -4.191256000 | -0.586491000 | 0.000064000  |
| 6 | -5.626557000 | -0.973430000 | -0.000026000 |
| 6 | -5.176767000 | -2.409464000 | -0.000129000 |
| 6 | -5.762232000 | -3.602465000 | -0.000439000 |
| 6 | -6.787974000 | -0.327730000 | 0.000062000  |
| 6 | -3.461393000 | 0.605405000  | 0.000068000  |
| 6 | -2.717546000 | 1.574181000  | 0.000183000  |
| 6 | -1.794806000 | 2.576856000  | 0.000348000  |
| 6 | -0.891250000 | 3.398699000  | 0.000349000  |
| 1 | 6.624192000  | -4.086030000 | 0.000304000  |
| 1 | 6.500021000  | -2.218381000 | 0.000363000  |
| 1 | 4.622400000  | -6.261384000 | -0.000303000 |
| 1 | 2.750868000  | -6.292446000 | -0.000316000 |
| 1 | -5.170273000 | -4.519965000 | -0.000441000 |

**0 3**

|   |              |              |              |
|---|--------------|--------------|--------------|
| 6 | -3.465317000 | 2.470856000  | -0.000096000 |
| 6 | -2.399150000 | 3.471981000  | 0.000061000  |
| 6 | -3.450158000 | 4.534212000  | 0.000014000  |
| 6 | -4.469084000 | 3.440279000  | -0.000166000 |
| 6 | -5.916744000 | 3.427477000  | -0.000353000 |
| 6 | -3.470483000 | 5.865130000  | 0.000244000  |
| 6 | -1.048938000 | 3.374331000  | 0.000060000  |
| 6 | 0.174123000  | 3.149285000  | 0.000070000  |
| 6 | 1.466421000  | 2.794779000  | 0.000057000  |
| 6 | 2.625459000  | 2.367745000  | 0.000038000  |
| 6 | 3.859879000  | 1.750941000  | 0.000091000  |
| 6 | 4.220810000  | 0.391673000  | -0.000104000 |
| 6 | 5.664640000  | 0.719050000  | -0.000152000 |
| 6 | 5.285026000  | 2.173877000  | 0.000093000  |
| 6 | 5.931386000  | 3.336694000  | 0.000318000  |
| 6 | 6.800236000  | 0.021973000  | -0.000314000 |
| 6 | 3.441855000  | -0.759659000 | -0.000122000 |
| 6 | 2.649728000  | -1.694725000 | -0.000136000 |
| 6 | 1.683333000  | -2.650248000 | -0.000107000 |
| 6 | 0.741383000  | -3.431986000 | -0.000097000 |
| 6 | -0.419007000 | -4.205556000 | 0.000033000  |
| 6 | -1.762257000 | -3.845126000 | 0.000114000  |
| 6 | -2.203014000 | -5.262604000 | 0.000124000  |
| 6 | -0.750314000 | -5.653915000 | 0.000035000  |
| 6 | -0.058528000 | -6.789371000 | 0.000071000  |
| 6 | -3.371443000 | -5.898094000 | 0.000103000  |
| 6 | -2.378077000 | -2.591135000 | 0.000104000  |
| 6 | -2.800611000 | -1.444558000 | 0.000074000  |
| 6 | -3.159600000 | -0.128952000 | -0.000011000 |
| 6 | -3.386184000 | 1.070670000  | -0.000077000 |
| 1 | 7.022686000  | 3.373531000  | 0.000289000  |
| 1 | 5.386559000  | 4.282955000  | 0.000565000  |
| 1 | 7.769028000  | 0.525497000  | -0.000297000 |
| 1 | 6.789871000  | -1.069838000 | -0.000384000 |
| 1 | 1.033353000  | -6.782868000 | 0.000026000  |

|   |              |              |              |   |              |              |              |
|---|--------------|--------------|--------------|---|--------------|--------------|--------------|
| 1 | -6.850169000 | -3.694612000 | -0.000693000 | 1 | -0.565423000 | -7.756446000 | 0.000152000  |
| 1 | -7.733948000 | -0.872931000 | -0.000205000 | 1 | -3.417900000 | -6.988940000 | -0.000039000 |
| 1 | -6.825252000 | 0.763498000  | -0.000124000 | 1 | -4.312829000 | -5.344913000 | 0.000096000  |
| 1 | 0.225946000  | 7.779568000  | -0.000441000 | 1 | -6.479100000 | 3.440453000  | -0.938628000 |
| 1 | -1.328994000 | 6.737640000  | -0.000608000 | 1 | -6.479377000 | 3.439601000  | 0.937761000  |
| 1 | 4.073842000  | 5.528512000  | -0.000198000 | 1 | -2.542704000 | 6.440312000  | 0.000407000  |
| 1 | 3.111508000  | 7.133971000  | -0.000329000 | 1 | -4.416393000 | 6.410499000  | 0.000241000  |

|                           |              |              |              |                           |              |              |              |
|---------------------------|--------------|--------------|--------------|---------------------------|--------------|--------------|--------------|
| <b>3m</b>                 |              |              |              | <b>3m</b>                 |              |              |              |
| <b>Cam-b3lyp/def2-SVP</b> |              |              |              | <b>Cam-b3lyp/def2-SVP</b> |              |              |              |
| <b>-2 1</b>               |              |              |              | <b>-2 3</b>               |              |              |              |
| 6                         | -3.264694000 | -2.734876000 | 0.000083000  | 6                         | -3.172416000 | -2.804480000 | 0.000121000  |
| 6                         | -3.938905000 | -1.482134000 | 0.000059000  | 6                         | -3.925741000 | -1.586244000 | -0.000078000 |
| 6                         | -5.250813000 | -2.189746000 | -0.000179000 | 6                         | -5.196899000 | -2.329644000 | -0.000204000 |
| 6                         | -4.511365000 | -3.496737000 | 0.000191000  | 6                         | -4.405199000 | -3.609721000 | 0.000007000  |
| 6                         | -4.904764000 | -4.782072000 | 0.000464000  | 6                         | -4.730245000 | -4.909020000 | 0.000075000  |
| 6                         | -6.530548000 | -1.815527000 | -0.000684000 | 6                         | -6.504513000 | -2.039858000 | -0.000412000 |
| 6                         | -3.541792000 | -0.180641000 | -0.000137000 | 6                         | -3.547839000 | -0.258200000 | -0.000008000 |
| 6                         | -3.032415000 | 0.964910000  | -0.000345000 | 6                         | -3.068029000 | 0.882219000  | -0.000059000 |
| 6                         | -2.391699000 | 2.121124000  | -0.000370000 | 6                         | -2.428235000 | 2.072274000  | -0.000194000 |
| 6                         | -1.670322000 | 3.155433000  | -0.000295000 | 6                         | -1.741719000 | 3.101561000  | -0.000317000 |
| 6                         | -0.766124000 | 4.147589000  | -0.000163000 | 6                         | -0.842459000 | 4.149384000  | -0.000079000 |
| 6                         | 0.727365000  | 4.154245000  | -0.000157000 | 6                         | 0.589149000  | 4.192939000  | 0.000027000  |
| 6                         | 0.727713000  | 5.629005000  | 0.000151000  | 6                         | 0.580856000  | 5.665403000  | 0.000210000  |
| 6                         | -0.779688000 | 5.622261000  | 0.000208000  | 6                         | -0.923553000 | 5.619706000  | 0.000129000  |
| 6                         | -1.702177000 | 6.593892000  | 0.000386000  | 6                         | -1.886567000 | 6.550527000  | 0.000186000  |
| 6                         | 1.641536000  | 6.608774000  | 0.000500000  | 6                         | 1.485467000  | 6.653113000  | 0.000317000  |
| 6                         | 1.640417000  | 3.170254000  | 0.000004000  | 6                         | 1.550368000  | 3.201543000  | -0.000178000 |
| 6                         | 2.371513000  | 2.142752000  | -0.000156000 | 6                         | 2.298029000  | 2.215828000  | -0.000302000 |
| 6                         | 3.023520000  | 0.992911000  | -0.000275000 | 6                         | 3.009028000  | 1.066824000  | -0.000156000 |
| 6                         | 3.543707000  | -0.147812000 | -0.000257000 | 6                         | 3.557291000  | -0.042287000 | -0.000048000 |
| 6                         | 3.952643000  | -1.445589000 | -0.000099000 | 6                         | 4.014958000  | -1.345005000 | -0.000060000 |
| 6                         | 3.289902000  | -2.704509000 | 0.000290000  | 6                         | 3.336657000  | -2.606662000 | 0.000081000  |
| 6                         | 4.543486000  | -3.454923000 | 0.000117000  | 6                         | 4.615934000  | -3.335774000 | 0.000016000  |
| 6                         | 5.270956000  | -2.141230000 | -0.000272000 | 6                         | 5.328710000  | -2.010115000 | -0.000223000 |
| 6                         | 6.547216000  | -1.755339000 | -0.000594000 | 6                         | 6.616441000  | -1.641864000 | -0.000510000 |

|   |              |              |              |   |              |              |              |
|---|--------------|--------------|--------------|---|--------------|--------------|--------------|
| 6 | 4.948562000  | -4.736632000 | 0.000204000  | 6 | 5.019113000  | -4.613030000 | 0.000151000  |
| 6 | 1.918992000  | -3.007853000 | 0.000403000  | 6 | 1.997459000  | -2.943234000 | 0.000297000  |
| 6 | 0.700828000  | -3.128416000 | 0.000456000  | 6 | 0.769966000  | -3.097786000 | 0.000473000  |
| 6 | -0.671829000 | -3.134973000 | 0.000319000  | 6 | -0.580647000 | -3.139036000 | 0.000467000  |
| 6 | -1.891051000 | -3.025717000 | 0.000175000  | 6 | -1.815247000 | -3.059343000 | 0.000364000  |
| 1 | -1.408150000 | 7.647140000  | 0.000544000  | 1 | -1.637229000 | 7.614848000  | 0.000256000  |
| 1 | -2.769477000 | 6.359442000  | 0.000309000  | 1 | -2.942387000 | 6.269580000  | 0.000143000  |
| 1 | 1.337902000  | 7.659289000  | 0.000803000  | 1 | 1.171833000  | 7.700287000  | 0.000360000  |
| 1 | 2.710901000  | 6.383897000  | 0.000346000  | 1 | 2.556430000  | 6.436969000  | 0.000441000  |
| 1 | 6.811376000  | -0.695027000 | -0.000835000 | 1 | 6.901373000  | -0.587125000 | -0.000630000 |
| 1 | 7.357384000  | -2.489465000 | -0.000711000 | 1 | 7.413315000  | -2.390175000 | -0.000516000 |
| 1 | 6.012603000  | -4.985751000 | 0.000047000  | 1 | 6.082864000  | -4.864811000 | -0.000022000 |
| 1 | 4.228577000  | -5.557929000 | 0.000316000  | 1 | 4.296573000  | -5.432554000 | 0.000594000  |
| 1 | -5.966528000 | -5.040713000 | 0.000377000  | 1 | -5.776789000 | -5.224776000 | -0.000414000 |
| 1 | -4.177414000 | -5.596865000 | 0.000524000  | 1 | -3.959356000 | -5.683217000 | 0.000197000  |
| 1 | -6.804159000 | -0.757617000 | -0.001027000 | 1 | -6.852546000 | -1.004223000 | -0.000554000 |
| 1 | -7.334049000 | -2.556953000 | -0.000850000 | 1 | -7.254773000 | -2.834898000 | -0.000426000 |

|                             |              |              |              |                             |             |              |              |
|-----------------------------|--------------|--------------|--------------|-----------------------------|-------------|--------------|--------------|
| <b>3m</b>                   |              |              |              | <b>3m</b>                   |             |              |              |
| <b>Cam-b3lyp/def2-tzvpp</b> |              |              |              | <b>Cam-b3lyp/def2-tzvpp</b> |             |              |              |
| <b>0 1</b>                  |              |              |              | <b>-2 3</b>                 |             |              |              |
| 6                           | -2.499936000 | 3.375040000  | -0.000045000 | 6                           | 1.202928000 | 4.026006000  | 0.000107000  |
| 6                           | -1.275161000 | 4.001575000  | 0.000164000  | 6                           | 2.478831000 | 3.392574000  | 0.000106000  |
| 6                           | -1.893254000 | 5.347030000  | 0.000051000  | 6                           | 3.163963000 | 4.687841000  | 0.000089000  |
| 6                           | -3.229263000 | 4.663603000  | 0.000100000  | 6                           | 1.820259000 | 5.354786000  | -0.000056000 |
| 6                           | -4.495481000 | 5.035556000  | 0.000028000  | 6                           | 1.411029000 | 6.621864000  | -0.000135000 |
| 6                           | -1.453940000 | 6.591476000  | 0.000162000  | 6                           | 4.420669000 | 5.127856000  | 0.000004000  |
| 6                           | 0.016165000  | 3.487736000  | 0.000190000  | 6                           | 2.860297000 | 2.074591000  | 0.000115000  |
| 6                           | 1.087335000  | 2.926488000  | 0.000147000  | 6                           | 3.056116000 | 0.864589000  | 0.000093000  |
| 6                           | 2.224029000  | 2.191621000  | -0.000146000 | 6                           | 3.140512000 | -0.474220000 | -0.000069000 |
| 6                           | 3.175174000  | 1.444808000  | -0.000347000 | 6                           | 3.098161000 | -1.699230000 | -0.000204000 |
| 6                           | 4.172991000  | 0.477385000  | -0.000149000 | 6                           | 2.885091000 | -3.054672000 | -0.000176000 |
| 6                           | 4.103313000  | -0.896578000 | -0.000015000 | 6                           | 1.698738000 | -3.843152000 | 0.000006000  |
| 6                           | 5.577569000  | -1.033896000 | 0.000006000  | 6                           | 2.477889000 | -5.083992000 | -0.000035000 |
| 6                           | 5.653580000  | 0.464848000  | -0.000074000 | 6                           | 3.727302000 | -4.253753000 | -0.000078000 |
| 6                           | 6.608702000  | 1.375551000  | -0.000092000 | 6                           | 5.029289000 | -4.532596000 | -0.000145000 |

|   |              |              |              |   |              |              |              |
|---|--------------|--------------|--------------|---|--------------|--------------|--------------|
| 6 | 6.435739000  | -2.036488000 | 0.000084000  | 6 | 2.230790000  | -6.392414000 | 0.000073000  |
| 6 | 3.012731000  | -1.758078000 | -0.000043000 | 6 | 0.366483000  | -3.514456000 | 0.000146000  |
| 6 | 1.991086000  | -2.405108000 | -0.000068000 | 6 | -0.779224000 | -3.078982000 | 0.000280000  |
| 6 | 0.786038000  | -3.021518000 | 0.000142000  | 6 | -1.980947000 | -2.482635000 | 0.000202000  |
| 6 | -0.336434000 | -3.471476000 | 0.000301000  | 6 | -3.020649000 | -1.833498000 | 0.000105000  |
| 6 | -1.673072000 | -3.852201000 | 0.000127000  | 6 | -4.088019000 | -0.971289000 | 0.000001000  |
| 6 | -2.828272000 | -3.105113000 | -0.000097000 | 6 | -4.177620000 | 0.450532000  | 0.000057000  |
| 6 | -3.684072000 | -4.313380000 | -0.000128000 | 6 | -5.641801000 | 0.396110000  | -0.000083000 |
| 6 | -2.423959000 | -5.128312000 | 0.000153000  | 6 | -5.547475000 | -1.101065000 | -0.000075000 |
| 6 | -2.112665000 | -6.410789000 | 0.000398000  | 6 | -6.440215000 | -2.089004000 | -0.000139000 |
| 6 | -4.981405000 | -4.555493000 | -0.000392000 | 6 | -6.651486000 | 1.264177000  | -0.000122000 |
| 6 | -3.029346000 | -1.729935000 | -0.000162000 | 6 | -3.226870000 | 1.439887000  | 0.000122000  |
| 6 | -3.079065000 | -0.521657000 | -0.000159000 | 6 | -2.276908000 | 2.214417000  | 0.000068000  |
| 6 | -3.010538000 | 0.830158000  | -0.000111000 | 6 | -1.159562000 | 2.956953000  | -0.000015000 |
| 6 | -2.838958000 | 2.027224000  | -0.000087000 | 6 | -0.077569000 | 3.532760000  | -0.000017000 |
| 1 | 7.650889000  | 1.090164000  | -0.000069000 | 1 | 5.376700000  | -5.557146000 | -0.000107000 |
| 1 | 6.375018000  | 2.430633000  | -0.000147000 | 1 | 5.770553000  | -3.745330000 | -0.000261000 |
| 1 | 7.501465000  | -1.858055000 | 0.000115000  | 1 | 3.040957000  | -7.109359000 | -0.000023000 |
| 1 | 6.096560000  | -3.062527000 | 0.000147000  | 1 | 1.217920000  | -6.771040000 | 0.000130000  |
| 1 | -1.082054000 | -6.735775000 | 0.000684000  | 1 | -6.129353000 | -3.124671000 | -0.000127000 |
| 1 | -2.880842000 | -7.170752000 | 0.000372000  | 1 | -7.501161000 | -1.877309000 | -0.000201000 |
| 1 | -5.359387000 | -5.567794000 | -0.000591000 | 1 | -7.677515000 | 0.921172000  | -0.000271000 |
| 1 | -5.700562000 | -3.748872000 | -0.000540000 | 1 | -6.472992000 | 2.330661000  | -0.000030000 |
| 1 | -4.769243000 | 6.080864000  | 0.000086000  | 1 | 2.124560000  | 7.435048000  | -0.000035000 |
| 1 | -5.292483000 | 4.305762000  | -0.000093000 | 1 | 0.358642000  | 6.870274000  | -0.000346000 |
| 1 | -0.395773000 | 6.810705000  | 0.000149000  | 1 | 5.254900000  | 4.439888000  | 0.000028000  |
| 1 | -2.141373000 | 7.425186000  | 0.000260000  | 1 | 4.636787000  | 6.187909000  | -0.000105000 |

**3a**  
**m06-2x/def2-SVP**  
**0 1**

|   |             |              |              |
|---|-------------|--------------|--------------|
| 6 | 1.786321000 | -3.855768000 | -0.103255000 |
| 6 | 0.451806000 | -4.223276000 | -0.004996000 |
| 6 | 0.798113000 | -5.661277000 | 0.156621000  |

**3a**  
**m06-2x/def2-SVP**  
**0 3**

|   |              |             |              |
|---|--------------|-------------|--------------|
| 6 | -0.762862000 | 4.187432000 | -0.042730000 |
| 6 | 0.620527000  | 4.213453000 | -0.004770000 |
| 6 | 0.649117000  | 5.692401000 | 0.144096000  |

|   |              |               |              |   |              |              |              |
|---|--------------|---------------|--------------|---|--------------|--------------|--------------|
| 6 | 2.244623000  | -5.269429000  | -0.038555000 | 6 | -0.857148000 | 5.668020000  | 0.018303000  |
| 6 | 3.461362000  | -5.835358000  | -0.227536000 | 6 | -1.907181000 | 6.512995000  | -0.131627000 |
| 6 | 3.663270000  | -7.286737000  | -0.442996000 | 6 | -1.761099000 | 7.966886000  | -0.371752000 |
| 6 | 4.783921000  | -7.932472000  | 0.104392000  | 6 | -2.666717000 | 8.872107000  | 0.205173000  |
| 1 | 5.506049000  | -7.351633000  | 0.681408000  | 1 | -3.480800000 | 8.490942000  | 0.824732000  |
| 6 | 4.967843000  | -9.301089000  | -0.067266000 | 6 | -2.522535000 | 10.242164000 | 0.008471000  |
| 1 | 5.836340000  | -9.790844000  | 0.376121000  | 1 | -3.226227000 | 10.933492000 | 0.475006000  |
| 6 | 4.043385000  | -10.045214000 | -0.801199000 | 6 | -1.480092000 | 10.730458000 | -0.780099000 |
| 6 | 2.939877000  | -9.410256000  | -1.370309000 | 6 | -0.589278000 | 9.839566000  | -1.378144000 |
| 1 | 2.216544000  | -9.984665000  | -1.951104000 | 1 | 0.224308000  | 10.213874000 | -2.001430000 |
| 6 | 2.754092000  | -8.041218000  | -1.197704000 | 6 | -0.731836000 | 8.468731000  | -1.180739000 |
| 1 | 1.892146000  | -7.542533000  | -1.645032000 | 1 | -0.037146000 | 7.770124000  | -1.650963000 |
| 6 | 0.039076000  | -6.718358000  | 0.533059000  | 6 | 1.662457000  | 6.536083000  | 0.456283000  |
| 6 | 0.578215000  | -8.019453000  | 0.988718000  | 6 | 1.478522000  | 7.935192000  | 0.903677000  |
| 6 | 1.725212000  | -8.094382000  | 1.790924000  | 6 | 0.426483000  | 8.296299000  | 1.756710000  |
| 1 | 2.226320000  | -7.171636000  | 2.089544000  | 1 | -0.265740000 | 7.526144000  | 2.102327000  |
| 6 | 2.223308000  | -9.328507000  | 2.199879000  | 6 | 0.261203000  | 9.619864000  | 2.155966000  |
| 1 | 3.122429000  | -9.370550000  | 2.816594000  | 1 | -0.568668000 | 9.886343000  | 2.812360000  |
| 6 | 1.578875000  | -10.505697000 | 1.820106000  | 6 | 1.149586000  | 10.601147000 | 1.716622000  |
| 6 | 0.423689000  | -10.442515000 | 1.040173000  | 6 | 2.213890000  | 10.249829000 | 0.885567000  |
| 1 | -0.089505000 | -11.359592000 | 0.746441000  | 1 | 2.916820000  | 11.011590000 | 0.544485000  |
| 6 | -0.078737000 | -9.209072000  | 0.636326000  | 6 | 2.382954000  | 8.926204000  | 0.490162000  |
| 1 | -0.984885000 | -9.157651000  | 0.029408000  | 1 | 3.217090000  | 8.649379000  | -0.157685000 |
| 6 | -1.440649000 | -6.562118000  | 0.557452000  | 6 | 3.059248000  | 6.024821000  | 0.411099000  |
| 6 | -2.163498000 | -6.914499000  | 1.708006000  | 6 | 3.915023000  | 6.223677000  | 1.506053000  |
| 1 | -1.629712000 | -7.327817000  | 2.566238000  | 1 | 3.549780000  | 6.777523000  | 2.373294000  |
| 6 | -3.539166000 | -6.718066000  | 1.764696000  | 6 | 5.204639000  | 5.703146000  | 1.497934000  |
| 1 | -4.086588000 | -6.974794000  | 2.672846000  | 1 | 5.852610000  | 5.846569000  | 2.363908000  |
| 6 | -4.216376000 | -6.183118000  | 0.666809000  | 6 | 5.665116000  | 4.989032000  | 0.389755000  |
| 6 | -3.512404000 | -5.861522000  | -0.491206000 | 6 | 4.834349000  | 4.812809000  | -0.714187000 |
| 1 | -4.036585000 | -5.444009000  | -1.351785000 | 1 | 5.188505000  | 4.255979000  | -1.582873000 |
| 6 | -2.133097000 | -6.053753000  | -0.547303000 | 6 | 3.541073000  | 5.332509000  | -0.705953000 |
| 1 | -1.578795000 | -5.799359000  | -1.452995000 | 1 | 2.888640000  | 5.195876000  | -1.570688000 |
| 6 | -0.699477000 | -3.428430000  | -0.010003000 | 6 | 1.537440000  | 3.151586000  | -0.032864000 |
| 6 | -1.638167000 | -2.640751000  | -0.044414000 | 6 | 2.242526000  | 2.149469000  | -0.075688000 |
| 6 | -2.631831000 | -1.707072000  | -0.086674000 | 6 | 2.965252000  | 0.994958000  | -0.120671000 |

|   |               |              |              |   |              |              |              |
|---|---------------|--------------|--------------|---|--------------|--------------|--------------|
| 6 | -3.464760000  | -0.807968000 | -0.121244000 | 6 | 3.550983000  | -0.087857000 | -0.148678000 |
| 6 | -4.267443000  | 0.338296000  | -0.132550000 | 6 | 4.034591000  | -1.385332000 | -0.152282000 |
| 6 | -3.895211000  | 1.670241000  | -0.012700000 | 6 | 3.292395000  | -2.640883000 | -0.016530000 |
| 6 | -5.305588000  | 2.135596000  | -0.101710000 | 6 | 4.578123000  | -3.395902000 | -0.067843000 |
| 6 | -5.713602000  | 0.681761000  | -0.161727000 | 6 | 5.304259000  | -2.073891000 | -0.138801000 |
| 6 | -6.825354000  | -0.092856000 | -0.137661000 | 6 | 6.596013000  | -1.581696000 | -0.116939000 |
| 6 | -6.715259000  | -1.545307000 | -0.442714000 | 6 | 6.837429000  | -0.179594000 | -0.529695000 |
| 6 | -6.006255000  | -1.982843000 | -1.569597000 | 6 | 6.237785000  | 0.338582000  | -1.688544000 |
| 1 | -5.504604000  | -1.247718000 | -2.202029000 | 1 | 5.562496000  | -0.294188000 | -2.267528000 |
| 6 | -5.965951000  | -3.335343000 | -1.902885000 | 6 | 6.520375000  | 1.632355000  | -2.118225000 |
| 1 | -5.421502000  | -3.655965000 | -2.792881000 | 1 | 6.056644000  | 2.011492000  | -3.030494000 |
| 6 | -6.634576000  | -4.269719000 | -1.114025000 | 6 | 7.404423000  | 2.432736000  | -1.395283000 |
| 6 | -7.335702000  | -3.846991000 | 0.017220000  | 6 | 7.996650000  | 1.935682000  | -0.232681000 |
| 1 | -7.857666000  | -4.574534000 | 0.641320000  | 1 | 8.682960000  | 2.559772000  | 0.342438000  |
| 6 | -7.381598000  | -2.495862000 | 0.346340000  | 6 | 7.720626000  | 0.640687000  | 0.193500000  |
| 1 | -7.944886000  | -2.162101000 | 1.219940000  | 1 | 8.191696000  | 0.248552000  | 1.096682000  |
| 6 | -8.178385000  | 0.423809000  | 0.169607000  | 6 | 7.757708000  | -2.380759000 | 0.299404000  |
| 6 | -9.303221000  | -0.094632000 | -0.492763000 | 6 | 9.022627000  | -2.160061000 | -0.278317000 |
| 1 | -9.170495000  | -0.886305000 | -1.232592000 | 1 | 9.135539000  | -1.384879000 | -1.037998000 |
| 6 | -10.574823000 | 0.404822000  | -0.227968000 | 6 | 10.116374000 | -2.937252000 | 0.086703000  |
| 1 | -11.437169000 | 0.000926000  | -0.760843000 | 1 | 11.085254000 | -2.762409000 | -0.383746000 |
| 6 | -10.746302000 | 1.420804000  | 0.712859000  | 6 | 9.974511000  | -3.942438000 | 1.044506000  |
| 6 | -9.639518000  | 1.927157000  | 1.393834000  | 6 | 8.731765000  | -4.158470000 | 1.641359000  |
| 1 | -9.766914000  | 2.717149000  | 2.135547000  | 1 | 8.614325000  | -4.938641000 | 2.394920000  |
| 6 | -8.366868000  | 1.428847000  | 1.129125000  | 6 | 7.635632000  | -3.384814000 | 1.275634000  |
| 1 | -7.500128000  | 1.821437000  | 1.664307000  | 1 | 6.664963000  | -3.553914000 | 1.745399000  |
| 6 | -5.823486000  | 3.377546000  | -0.258540000 | 6 | 4.808949000  | -4.724631000 | -0.212107000 |
| 6 | -7.218318000  | 3.659102000  | -0.667518000 | 6 | 6.120065000  | -5.316630000 | -0.558971000 |
| 6 | -7.867386000  | 2.879539000  | -1.634619000 | 6 | 6.972673000  | -4.714480000 | -1.494340000 |
| 1 | -7.329504000  | 2.049574000  | -2.096871000 | 1 | 6.657488000  | -3.791423000 | -1.984822000 |
| 6 | -9.182170000  | 3.155744000  | -2.000355000 | 6 | 8.207935000  | -5.282256000 | -1.795164000 |
| 1 | -9.676740000  | 2.534204000  | -2.748433000 | 1 | 8.863504000  | -4.797115000 | -2.520001000 |
| 6 | -9.865468000  | 4.218968000  | -1.410662000 | 6 | 8.608637000  | -6.461865000 | -1.168183000 |
| 6 | -9.222348000  | 5.015246000  | -0.462378000 | 6 | 7.758584000  | -7.082995000 | -0.252124000 |
| 1 | -9.749103000  | 5.853317000  | -0.003207000 | 1 | 8.062473000  | -8.011128000 | 0.234569000  |
| 6 | -7.905928000  | 4.744248000  | -0.101348000 | 6 | 6.519707000  | -6.521683000 | 0.041307000  |

|   |              |             |              |   |              |              |              |
|---|--------------|-------------|--------------|---|--------------|--------------|--------------|
| 1 | -7.399287000 | 5.369249000 | 0.636766000  | 1 | 5.850812000  | -7.008862000 | 0.753556000  |
| 6 | -4.932798000 | 4.555670000 | -0.075076000 | 6 | 3.669562000  | -5.672508000 | -0.079866000 |
| 6 | -4.130003000 | 4.689614000 | 1.063582000  | 6 | 2.804338000  | -5.627694000 | 1.019399000  |
| 1 | -4.183615000 | 3.930149000 | 1.846236000  | 1 | 2.986183000  | -4.899425000 | 1.812052000  |
| 6 | -3.262229000 | 5.772659000 | 1.194771000  | 6 | 1.714465000  | -6.493088000 | 1.097752000  |
| 1 | -2.625103000 | 5.854093000 | 2.076788000  | 1 | 1.034377000  | -6.433431000 | 1.948853000  |
| 6 | -3.195192000 | 6.739248000 | 0.194105000  | 6 | 1.482543000  | -7.418771000 | 0.082689000  |
| 6 | -4.012685000 | 6.630264000 | -0.932698000 | 6 | 2.354643000  | -7.489960000 | -1.005085000 |
| 1 | -3.965798000 | 7.386589000 | -1.717604000 | 1 | 2.178757000  | -8.215090000 | -1.801037000 |
| 6 | -4.880771000 | 5.551741000 | -1.062990000 | 6 | 3.444463000  | -6.629350000 | -1.082117000 |
| 1 | -5.517988000 | 5.460429000 | -1.944974000 | 1 | 4.126393000  | -6.679098000 | -1.933447000 |
| 6 | -2.623997000 | 2.245249000 | 0.084827000  | 6 | 1.980555000  | -2.876886000 | 0.068117000  |
| 6 | -1.471393000 | 2.654611000 | 0.165156000  | 6 | 0.719868000  | -2.979578000 | 0.155662000  |
| 6 | -0.166460000 | 3.046718000 | 0.223364000  | 6 | -0.583682000 | -3.029387000 | 0.224237000  |
| 6 | 1.027575000  | 3.325250000 | 0.232743000  | 6 | -1.850270000 | -3.009356000 | 0.243293000  |
| 6 | 2.416874000  | 3.463993000 | 0.145237000  | 6 | -3.171474000 | -2.797178000 | 0.186530000  |
| 6 | 3.372928000  | 2.506517000 | -0.165348000 | 6 | -3.909701000 | -1.572004000 | -0.080650000 |
| 6 | 4.472025000  | 3.504936000 | -0.145020000 | 6 | -5.175883000 | -2.271538000 | -0.101953000 |
| 6 | 3.429846000  | 4.551196000 | 0.181130000  | 6 | -4.449203000 | -3.567001000 | 0.170604000  |
| 6 | 3.310131000  | 5.888986000 | 0.362429000  | 6 | -4.679472000 | -4.900132000 | 0.267864000  |
| 6 | 2.044106000  | 6.445363000 | 0.912363000  | 6 | -3.597256000 | -5.795334000 | 0.761491000  |
| 6 | 1.435377000  | 5.861939000 | 2.032103000  | 6 | -2.880190000 | -5.474994000 | 1.922443000  |
| 1 | 1.885921000  | 4.975313000 | 2.482424000  | 1 | -3.100544000 | -4.541819000 | 2.443964000  |
| 6 | 0.286043000  | 6.419852000 | 2.588781000  | 6 | -1.914928000 | -6.345328000 | 2.424062000  |
| 1 | -0.167126000 | 5.958205000 | 3.467764000  | 1 | -1.375755000 | -6.085926000 | 3.336846000  |
| 6 | -0.268941000 | 7.572818000 | 2.036580000  | 6 | -1.653069000 | -7.549756000 | 1.772600000  |
| 6 | 0.325387000  | 8.160500000 | 0.917790000  | 6 | -2.355626000 | -7.876381000 | 0.611294000  |
| 1 | -0.105854000 | 9.062079000 | 0.478900000  | 1 | -2.153178000 | -8.816274000 | 0.094633000  |
| 6 | 1.474539000  | 7.605391000 | 0.363801000  | 6 | -3.324375000 | -7.009871000 | 0.113579000  |
| 1 | 1.947721000  | 8.073048000 | -0.501721000 | 1 | -3.885758000 | -7.272071000 | -0.785297000 |
| 6 | 4.381715000  | 6.859791000 | 0.043351000  | 6 | -5.963054000 | -5.544364000 | -0.087944000 |
| 6 | 4.599189000  | 7.974327000 | 0.869569000  | 6 | -6.451027000 | -6.621955000 | 0.669579000  |
| 1 | 3.972314000  | 8.115676000 | 1.752156000  | 1 | -5.871760000 | -6.980880000 | 1.522496000  |
| 6 | 5.611605000  | 8.884170000 | 0.580335000  | 6 | -7.667680000 | -7.217923000 | 0.352106000  |
| 1 | 5.776934000  | 9.738417000 | 1.238863000  | 1 | -8.040671000 | -8.044644000 | 0.958841000  |
| 6 | 6.413364000  | 8.704252000 | -0.547499000 | 6 | -8.409029000 | -6.759453000 | -0.737758000 |

|   |             |              |              |   |               |              |              |
|---|-------------|--------------|--------------|---|---------------|--------------|--------------|
| 6 | 6.192508000 | 7.612919000  | -1.387144000 | 6 | -7.921852000  | -5.707572000 | -1.513179000 |
| 1 | 6.812332000 | 7.469078000  | -2.273474000 | 1 | -8.492480000  | -5.349250000 | -2.371337000 |
| 6 | 5.181985000 | 6.700151000  | -1.096751000 | 6 | -6.707411000  | -5.107078000 | -1.192954000 |
| 1 | 5.004253000 | 5.846941000  | -1.754422000 | 1 | -6.323172000  | -4.285010000 | -1.800163000 |
| 6 | 5.810649000 | 3.347929000  | -0.287363000 | 6 | -6.459098000  | -1.781076000 | -0.239975000 |
| 6 | 6.816967000 | 4.368446000  | 0.079510000  | 6 | -7.668314000  | -2.523030000 | 0.146910000  |
| 6 | 6.656916000 | 5.162392000  | 1.224131000  | 6 | -7.664741000  | -3.395062000 | 1.248643000  |
| 1 | 5.773024000 | 5.020025000  | 1.849097000  | 1 | -6.747845000  | -3.512894000 | 1.829305000  |
| 6 | 7.609406000 | 6.120281000  | 1.560448000  | 6 | -8.811386000  | -4.099176000 | 1.600703000  |
| 1 | 7.466225000 | 6.735725000  | 2.449957000  | 1 | -8.787873000  | -4.776519000 | 2.455708000  |
| 6 | 8.739887000 | 6.294926000  | 0.762249000  | 6 | -9.984567000  | -3.945114000 | 0.861046000  |
| 6 | 8.919082000 | 5.498587000  | -0.369341000 | 6 | -10.007880000 | -3.070491000 | -0.226409000 |
| 1 | 9.804121000 | 5.627010000  | -0.994564000 | 1 | -10.922800000 | -2.943823000 | -0.807348000 |
| 6 | 7.970336000 | 4.536599000  | -0.703294000 | 6 | -8.864714000  | -2.359443000 | -0.575520000 |
| 1 | 8.111436000 | 3.910893000  | -1.586783000 | 1 | -8.883070000  | -1.679761000 | -1.429331000 |
| 6 | 6.323947000 | 2.058846000  | -0.827124000 | 6 | -6.635080000  | -0.407987000 | -0.768760000 |
| 6 | 5.773553000 | 1.503677000  | -1.989728000 | 6 | -5.924684000  | 0.024501000  | -1.899104000 |
| 1 | 4.964044000 | 2.030288000  | -2.499280000 | 1 | -5.242497000  | -0.667788000 | -2.396170000 |
| 6 | 6.253387000 | 0.298717000  | -2.498972000 | 6 | -6.087642000  | 1.316399000  | -2.391637000 |
| 1 | 5.811163000 | -0.122468000 | -3.402764000 | 1 | -5.524781000  | 1.636404000  | -3.269415000 |
| 6 | 7.296085000 | -0.363971000 | -1.855843000 | 6 | -6.967127000  | 2.197463000  | -1.764861000 |
| 6 | 7.862359000 | 0.186931000  | -0.704059000 | 6 | -7.690707000  | 1.776180000  | -0.647084000 |
| 1 | 8.683943000 | -0.324065000 | -0.198279000 | 1 | -8.384710000  | 2.459069000  | -0.153402000 |
| 6 | 7.386034000 | 1.392016000  | -0.197142000 | 6 | -7.532036000  | 0.484459000  | -0.156417000 |
| 1 | 7.831786000 | 1.827166000  | 0.699623000  | 1 | -8.096520000  | 0.155449000  | 0.718159000  |
| 6 | 3.247394000 | 1.119361000  | -0.289796000 | 6 | -3.449727000  | -0.265394000 | -0.153442000 |
| 6 | 3.026196000 | -0.085805000 | -0.323679000 | 6 | -2.921228000  | 0.844348000  | -0.179234000 |
| 6 | 2.703357000 | -1.410441000 | -0.305023000 | 6 | -2.270527000  | 2.043213000  | -0.173086000 |
| 6 | 2.346338000 | -2.581093000 | -0.237007000 | 6 | -1.629617000  | 3.086351000  | -0.133513000 |
| 6 | 4.679304000 | -4.980068000 | -0.234946000 | 6 | -3.293546000  | 5.975901000  | -0.076910000 |
| 6 | 5.668378000 | -5.162139000 | -1.214507000 | 6 | -4.248500000  | 6.378591000  | -1.024428000 |
| 6 | 4.886134000 | -4.014604000 | 0.759541000  | 6 | -3.683952000  | 5.091707000  | 0.937908000  |
| 6 | 6.827157000 | -4.392132000 | -1.202345000 | 6 | -5.552284000  | 5.897178000  | -0.964299000 |
| 1 | 5.520476000 | -5.919922000 | -1.986413000 | 1 | -3.956270000  | 7.076627000  | -1.811398000 |
| 6 | 6.044672000 | -3.239945000 | 0.769309000  | 6 | -4.989020000  | 4.605862000  | 0.995684000  |
| 1 | 4.134563000 | -3.883834000 | 1.540456000  | 1 | -2.956032000  | 4.794628000  | 1.695272000  |

|   |               |               |              |   |               |              |              |
|---|---------------|---------------|--------------|---|---------------|--------------|--------------|
| 6 | 7.019749000   | -3.432288000  | -0.207002000 | 6 | -5.926258000  | 5.011114000  | 0.048102000  |
| 1 | 7.587003000   | -4.545021000  | -1.970721000 | 1 | -6.282567000  | 6.217649000  | -1.709505000 |
| 1 | 6.189184000   | -2.488837000  | 1.547295000  | 1 | -5.275521000  | 3.913035000  | 1.788229000  |
| 1 | 7.207256000   | 9.417480000   | -0.775148000 | 1 | -9.363133000  | -7.226597000 | -0.987169000 |
| 1 | 9.484404000   | 7.047880000   | 1.026014000  | 1 | -10.881406000 | -4.502824000 | 1.135489000  |
| 1 | 7.668409000   | -1.308759000  | -2.254506000 | 1 | -7.088332000  | 3.211552000  | -2.148576000 |
| 1 | 7.933717000   | -2.836974000  | -0.188388000 | 1 | -6.950652000  | 4.640071000  | 0.102183000  |
| 1 | 4.185853000   | -11.118813000 | -0.934751000 | 1 | -1.365166000  | 11.804718000 | -0.933411000 |
| 1 | 1.973011000   | -11.472126000 | 2.138637000  | 1 | 1.016393000   | 11.638503000 | 2.027969000  |
| 1 | -5.292848000  | -6.012614000  | 0.716588000  | 1 | 6.670960000   | 4.566541000  | 0.389752000  |
| 1 | -6.615147000  | -5.328101000  | -1.382666000 | 1 | 7.634901000   | 3.443529000  | -1.738462000 |
| 1 | -11.742903000 | 1.814141000   | 0.919750000  | 1 | 10.831942000  | -4.554457000 | 1.328808000  |
| 1 | -10.897092000 | 4.431466000   | -1.695948000 | 1 | 9.579809000   | -6.901903000 | -1.400438000 |
| 1 | -2.501982000  | 7.576035000   | 0.289266000  | 1 | 0.618358000   | -8.082321000 | 0.135940000  |
| 1 | -1.161857000  | 8.018387000   | 2.480236000  | 1 | -0.905461000  | -8.237748000 | 2.173159000  |

|                        |              |               |              |                        |              |               |              |
|------------------------|--------------|---------------|--------------|------------------------|--------------|---------------|--------------|
| <b>3a</b>              |              |               |              | <b>3a</b>              |              |               |              |
| <b>m06-2x/def2-SVP</b> |              |               |              | <b>m06-2x/def2-SVP</b> |              |               |              |
| <b>-2 1</b>            |              |               |              | <b>-2 3</b>            |              |               |              |
| 6                      | 0.535406000  | -4.228726000  | -0.051134000 | 6                      | 1.519502000  | -3.962764000  | -0.062708000 |
| 6                      | -0.860018000 | -4.173878000  | 0.002000000  | 6                      | 0.120542000  | -4.249458000  | 0.016719000  |
| 6                      | -0.960698000 | -5.648637000  | 0.136315000  | 6                      | 0.383624000  | -5.692733000  | 0.149556000  |
| 6                      | 0.540386000  | -5.705763000  | -0.025078000 | 6                      | 1.858688000  | -5.393471000  | -0.040945000 |
| 6                      | 1.538788000  | -6.618974000  | -0.198963000 | 6                      | 3.037372000  | -6.061272000  | -0.231808000 |
| 6                      | 1.298831000  | -8.048071000  | -0.493801000 | 6                      | 3.124840000  | -7.506671000  | -0.527026000 |
| 6                      | 2.164806000  | -9.038561000  | 0.003964000  | 6                      | 4.200456000  | -8.276724000  | -0.045640000 |
| 1                      | 3.022613000  | -8.734871000  | 0.607184000  | 1                      | 4.974861000  | -7.787844000  | 0.548660000  |
| 6                      | 1.931147000  | -10.387598000 | -0.244983000 | 6                      | 4.277778000  | -9.642935000  | -0.297017000 |
| 1                      | 2.610641000  | -11.137978000 | 0.164882000  | 1                      | 5.116299000  | -10.218398000 | 0.101576000  |
| 6                      | 0.828751000  | -10.782526000 | -1.004300000 | 6                      | 3.283375000  | -10.279634000 | -1.041105000 |
| 6                      | -0.026916000 | -9.810842000  | -1.522925000 | 6                      | 2.220820000  | -9.527450000  | -1.541950000 |
| 1                      | -0.892322000 | -10.105166000 | -2.119842000 | 1                      | 1.434878000  | -10.010975000 | -2.125543000 |
| 6                      | 0.211957000  | -8.460522000  | -1.281808000 | 6                      | 2.149200000  | -8.158314000  | -1.299774000 |
| 1                      | -0.457401000 | -7.702455000  | -1.692664000 | 1                      | 1.316689000  | -7.573590000  | -1.695425000 |
| 6                      | -2.011990000 | -6.452601000  | 0.451858000  | 6                      | -0.430996000 | -6.738460000  | 0.481367000  |
| 6                      | -1.885741000 | -7.863275000  | 0.882243000  | 6                      | 0.040013000  | -8.071042000  | 0.913434000  |

|   |              |               |              |   |              |               |              |
|---|--------------|---------------|--------------|---|--------------|---------------|--------------|
| 6 | -0.821954000 | -8.294605000  | 1.689300000  | 6 | 1.192091000  | -8.231486000  | 1.700123000  |
| 1 | -0.073359000 | -7.566635000  | 2.007267000  | 1 | 1.752464000  | -7.343287000  | 1.997732000  |
| 6 | -0.707450000 | -9.630393000  | 2.065989000  | 6 | 1.628812000  | -9.497303000  | 2.081765000  |
| 1 | 0.141020000  | -9.945767000  | 2.676171000  | 1 | 2.540326000  | -9.593993000  | 2.674939000  |
| 6 | -1.664478000 | -10.561297000 | 1.662946000  | 6 | 0.914328000  | -10.635078000 | 1.706583000  |
| 6 | -2.744285000 | -10.141398000 | 0.885046000  | 6 | -0.249209000 | -10.491323000 | 0.949481000  |
| 1 | -3.502752000 | -10.860038000 | 0.567459000  | 1 | -0.820866000 | -11.372935000 | 0.651083000  |
| 6 | -2.856370000 | -8.807291000  | 0.504876000  | 6 | -0.682172000 | -9.226707000  | 0.562911000  |
| 1 | -3.700105000 | -8.480077000  | -0.106150000 | 1 | -1.590091000 | -9.118578000  | -0.034019000 |
| 6 | -3.383753000 | -5.874756000  | 0.450887000  | 6 | -1.902003000 | -6.518569000  | 0.504333000  |
| 6 | -4.239965000 | -6.077279000  | 1.546652000  | 6 | -2.669857000 | -6.943955000  | 1.602696000  |
| 1 | -3.894308000 | -6.690484000  | 2.381850000  | 1 | -2.171128000 | -7.457260000  | 2.427735000  |
| 6 | -5.496148000 | -5.481359000  | 1.588711000  | 6 | -4.037226000 | -6.694983000  | 1.659520000  |
| 1 | -6.135850000 | -5.627380000  | 2.461343000  | 1 | -4.609434000 | -7.012092000  | 2.533865000  |
| 6 | -5.926641000 | -4.674310000  | 0.533141000  | 6 | -4.672044000 | -6.017823000  | 0.616068000  |
| 6 | -5.100127000 | -4.491950000  | -0.572616000 | 6 | -3.928242000 | -5.613549000  | -0.490036000 |
| 1 | -5.423522000 | -3.848593000  | -1.391969000 | 1 | -4.411258000 | -5.069140000  | -1.302481000 |
| 6 | -3.845249000 | -5.096722000  | -0.618280000 | 6 | -2.559887000 | -5.870196000  | -0.549220000 |
| 1 | -3.195409000 | -4.943291000  | -1.481527000 | 1 | -1.978810000 | -5.542307000  | -1.412718000 |
| 6 | -1.720077000 | -3.080140000  | -0.011810000 | 6 | -0.965422000 | -3.397591000  | 0.013325000  |
| 6 | -2.370539000 | -2.032176000  | -0.057799000 | 6 | -1.851477000 | -2.531820000  | -0.033283000 |
| 6 | -3.027740000 | -0.850381000  | -0.106971000 | 6 | -2.761112000 | -1.533949000  | -0.081223000 |
| 6 | -3.543667000 | 0.275951000   | -0.123386000 | 6 | -3.529665000 | -0.562465000  | -0.114484000 |
| 6 | -3.955764000 | 1.590287000   | -0.126693000 | 6 | -4.227587000 | 0.630844000   | -0.133697000 |
| 6 | -3.141419000 | 2.804136000   | -0.025944000 | 6 | -3.749924000 | 1.975968000   | -0.052103000 |
| 6 | -4.394144000 | 3.616853000   | -0.074509000 | 6 | -5.123874000 | 2.507552000   | -0.127005000 |
| 6 | -5.196947000 | 2.329746000   | -0.083766000 | 6 | -5.625216000 | 1.077117000   | -0.130480000 |
| 6 | -6.523209000 | 1.939123000   | -0.039771000 | 6 | -6.807644000 | 0.388007000   | -0.071648000 |
| 6 | -6.873721000 | 0.549980000   | -0.421737000 | 6 | -6.816059000 | -1.063984000  | -0.388941000 |
| 6 | -6.289067000 | -0.063537000  | -1.544723000 | 6 | -6.125980000 | -1.558258000  | -1.507409000 |
| 1 | -5.532865000 | 0.485745000   | -2.108439000 | 1 | -5.544542000 | -0.864345000  | -2.116804000 |
| 6 | -6.665389000 | -1.340522000  | -1.949983000 | 6 | -6.184416000 | -2.906819000  | -1.849491000 |
| 1 | -6.195912000 | -1.782476000  | -2.831741000 | 1 | -5.639108000 | -3.262365000  | -2.726182000 |
| 6 | -7.638726000 | -2.049798000  | -1.244280000 | 6 | -6.936282000 | -3.796362000  | -1.082645000 |
| 6 | -8.217827000 | -1.465956000  | -0.116105000 | 6 | -7.618055000 | -3.324228000  | 0.040404000  |
| 1 | -8.968918000 | -2.013504000  | 0.458398000  | 1 | -8.197257000 | -4.013790000  | 0.658537000  |

|   |               |              |              |   |               |              |              |
|---|---------------|--------------|--------------|---|---------------|--------------|--------------|
| 6 | -7.840169000  | -0.188521000 | 0.287971000  | 6 | -7.559544000  | -1.975874000 | 0.380634000  |
| 1 | -8.300755000  | 0.260675000  | 1.170186000  | 1 | -8.098923000  | -1.609516000 | 1.256552000  |
| 6 | -7.616627000  | 2.818771000  | 0.397737000  | 6 | -8.097424000  | 0.998068000  | 0.307008000  |
| 6 | -8.921590000  | 2.683950000  | -0.123603000 | 6 | -9.307240000  | 0.545342000  | -0.253805000 |
| 1 | -9.115658000  | 1.905026000  | -0.863398000 | 1 | -9.281261000  | -0.271481000 | -0.977617000 |
| 6 | -9.951280000  | 3.534041000  | 0.265179000  | 6 | -10.522268000 | 1.134519000  | 0.081371000  |
| 1 | -10.945701000 | 3.407120000  | -0.169691000 | 1 | -11.443169000 | 0.771483000  | -0.380567000 |
| 6 | -9.717742000  | 4.555295000  | 1.188137000  | 6 | -10.565875000 | 2.193099000  | 0.989836000  |
| 6 | -8.437544000  | 4.696950000  | 1.725939000  | 6 | -9.378528000  | 2.642185000  | 1.568467000  |
| 1 | -8.233706000  | 5.488159000  | 2.450806000  | 1 | -9.395330000  | 3.469442000  | 2.280844000  |
| 6 | -7.410997000  | 3.836225000  | 1.350508000  | 6 | -8.164224000  | 2.044939000  | 1.242808000  |
| 1 | -6.416732000  | 3.950666000  | 1.786490000  | 1 | -7.238722000  | 2.397545000  | 1.701784000  |
| 6 | -4.570285000  | 4.950830000  | -0.266990000 | 6 | -5.598823000  | 3.777771000  | -0.287119000 |
| 6 | -5.855678000  | 5.598871000  | -0.618278000 | 6 | -6.983467000  | 4.116619000  | -0.679318000 |
| 6 | -6.765531000  | 5.003965000  | -1.503488000 | 6 | -7.707746000  | 3.333892000  | -1.592538000 |
| 1 | -6.519951000  | 4.032493000  | -1.936180000 | 1 | -7.230684000  | 2.450400000  | -2.020733000 |
| 6 | -7.974709000  | 5.625175000  | -1.806274000 | 6 | -9.017133000  | 3.660679000  | -1.935515000 |
| 1 | -8.677984000  | 5.131626000  | -2.479552000 | 1 | -9.565066000  | 3.021830000  | -2.630976000 |
| 6 | -8.294264000  | 6.860042000  | -1.242880000 | 6 | -9.629551000  | 4.789853000  | -1.392006000 |
| 6 | -7.386337000  | 7.476789000  | -0.381443000 | 6 | -8.913220000  | 5.595146000  | -0.505385000 |
| 1 | -7.623977000  | 8.445393000  | 0.063536000  | 1 | -9.378895000  | 6.484350000  | -0.074732000 |
| 6 | -6.178081000  | 6.856054000  | -0.079306000 | 6 | -7.606684000  | 5.265338000  | -0.158458000 |
| 1 | -5.468016000  | 7.337719000  | 0.596115000  | 1 | -7.050401000  | 5.894815000  | 0.539158000  |
| 6 | -3.388533000  | 5.855148000  | -0.199358000 | 6 | -4.654750000  | 4.919441000  | -0.148332000 |
| 6 | -2.479260000  | 5.792848000  | 0.862933000  | 6 | -3.766694000  | 5.006967000  | 0.931921000  |
| 1 | -2.651310000  | 5.073519000  | 1.664892000  | 1 | -3.788223000  | 4.230020000  | 1.697856000  |
| 6 | -1.350386000  | 6.610169000  | 0.884106000  | 6 | -2.843148000  | 6.047187000  | 1.017598000  |
| 1 | -0.630895000  | 6.516047000  | 1.698579000  | 1 | -2.131113000  | 6.072067000  | 1.843898000  |
| 6 | -1.120276000  | 7.516147000  | -0.148331000 | 6 | -2.802868000  | 7.033666000  | 0.035065000  |
| 6 | -2.034704000  | 7.609947000  | -1.199355000 | 6 | -3.704787000  | 6.979465000  | -1.029766000 |
| 1 | -1.860163000  | 8.313787000  | -2.015632000 | 1 | -3.678719000  | 7.745017000  | -1.808014000 |
| 6 | -3.158765000  | 6.790805000  | -1.221624000 | 6 | -4.620686000  | 5.936397000  | -1.118544000 |
| 1 | -3.868427000  | 6.853609000  | -2.049475000 | 1 | -5.313242000  | 5.884650000  | -1.961545000 |
| 6 | -1.818668000  | 3.003099000  | 0.035682000  | 6 | -2.466451000  | 2.473180000  | 0.015996000  |
| 6 | -0.552695000  | 3.050103000  | 0.118570000  | 6 | -1.274461000  | 2.808104000  | 0.096271000  |
| 6 | 0.756362000   | 3.025318000  | 0.187894000  | 6 | 0.039516000   | 3.103856000  | 0.161662000  |

|   |              |             |              |   |              |             |              |
|---|--------------|-------------|--------------|---|--------------|-------------|--------------|
| 6 | 2.020584000  | 2.916909000 | 0.217680000  | 6 | 1.265259000  | 3.295118000 | 0.186108000  |
| 6 | 3.322425000  | 2.596301000 | 0.185827000  | 6 | 2.643674000  | 3.311568000 | 0.144402000  |
| 6 | 4.012334000  | 1.331252000 | -0.027865000 | 6 | 3.567307000  | 2.243075000 | -0.084527000 |
| 6 | 5.319344000  | 1.944563000 | -0.015760000 | 6 | 4.708892000  | 3.166231000 | -0.067270000 |
| 6 | 4.646571000  | 3.288567000 | 0.185465000  | 6 | 3.729255000  | 4.301400000 | 0.161145000  |
| 6 | 4.942701000  | 4.614035000 | 0.234523000  | 6 | 3.719965000  | 5.665461000 | 0.277878000  |
| 6 | 3.893625000  | 5.584260000 | 0.657956000  | 6 | 2.496362000  | 6.344262000 | 0.779331000  |
| 6 | 3.124559000  | 5.350475000 | 1.806673000  | 6 | 1.792134000  | 5.839455000 | 1.884459000  |
| 1 | 3.267555000  | 4.418960000 | 2.356264000  | 1 | 2.135080000  | 4.914410000 | 2.350620000  |
| 6 | 2.195271000  | 6.290031000 | 2.247471000  | 6 | 0.679098000  | 6.504762000 | 2.392377000  |
| 1 | 1.607479000  | 6.085608000 | 3.144518000  | 1 | 0.151405000  | 6.088258000 | 3.252809000  |
| 6 | 2.017718000  | 7.483713000 | 1.549619000  | 6 | 0.243390000  | 7.695277000 | 1.811511000  |
| 6 | 2.768513000  | 7.725312000 | 0.398042000  | 6 | 0.926505000  | 8.206655000 | 0.706513000  |
| 1 | 2.627210000  | 8.651327000 | -0.163489000 | 1 | 0.586752000  | 9.130466000 | 0.232877000  |
| 6 | 3.699137000  | 6.786989000 | -0.039401000 | 6 | 2.038208000  | 7.540511000 | 0.199296000  |
| 1 | 4.294570000  | 6.981178000 | -0.933895000 | 1 | 2.571132000  | 7.946386000 | -0.662966000 |
| 6 | 6.260206000  | 5.194914000 | -0.113404000 | 6 | 4.858132000  | 6.531233000 | -0.092179000 |
| 6 | 6.764857000  | 6.300108000 | 0.593112000  | 6 | 5.139887000  | 7.707302000 | 0.628311000  |
| 1 | 6.172889000  | 6.723869000 | 1.406767000  | 1 | 4.504176000  | 7.972612000 | 1.475396000  |
| 6 | 8.008228000  | 6.842188000 | 0.281655000  | 6 | 6.218890000  | 8.517983000 | 0.290025000  |
| 1 | 8.388020000  | 7.690211000 | 0.855509000  | 1 | 6.422529000  | 9.417527000 | 0.875292000  |
| 6 | 8.771633000  | 6.297624000 | -0.751319000 | 6 | 7.046077000  | 8.178848000 | -0.781815000 |
| 6 | 8.273566000  | 5.214420000 | -1.474615000 | 6 | 6.770611000  | 7.025840000 | -1.516867000 |
| 1 | 8.863875000  | 4.775731000 | -2.281106000 | 1 | 7.409474000  | 6.746192000 | -2.356904000 |
| 6 | 7.028154000  | 4.674070000 | -1.165232000 | 6 | 5.685147000  | 6.220014000 | -1.184677000 |
| 1 | 6.641926000  | 3.819859000 | -1.724459000 | 1 | 5.470756000  | 5.319954000 | -1.764072000 |
| 6 | 6.598678000  | 1.426141000 | -0.125706000 | 6 | 6.055365000  | 2.938223000 | -0.166685000 |
| 6 | 7.810513000  | 2.137327000 | 0.304048000  | 6 | 7.098065000  | 3.906800000 | 0.224697000  |
| 6 | 7.798777000  | 3.033326000 | 1.391429000  | 6 | 6.918250000  | 4.776927000 | 1.313592000  |
| 1 | 6.861827000  | 3.187183000 | 1.930521000  | 1 | 5.983008000  | 4.727167000 | 1.874607000  |
| 6 | 8.943843000  | 3.724579000 | 1.774983000  | 6 | 7.899855000  | 5.698559000 | 1.666312000  |
| 1 | 8.890354000  | 4.426682000 | 2.610081000  | 1 | 7.723109000  | 6.376759000 | 2.503534000  |
| 6 | 10.152404000 | 3.526267000 | 1.105623000  | 6 | 9.098775000  | 5.761839000 | 0.955648000  |
| 6 | 10.193187000 | 2.621771000 | 0.042375000  | 6 | 9.304830000  | 4.887630000 | -0.112553000 |
| 1 | 11.129020000 | 2.453174000 | -0.496117000 | 1 | 10.238506000 | 4.925126000 | -0.678258000 |
| 6 | 9.045714000  | 1.941684000 | -0.350919000 | 6 | 8.320306000  | 3.971767000 | -0.470586000 |

|   |               |               |              |   |               |               |              |
|---|---------------|---------------|--------------|---|---------------|---------------|--------------|
| 1 | 9.088732000   | 1.249989000   | -1.194565000 | 1 | 8.484016000   | 3.296577000   | -1.312795000 |
| 6 | 6.762358000   | 0.045641000   | -0.641730000 | 6 | 6.518340000   | 1.613644000   | -0.660219000 |
| 6 | 6.006360000   | -0.419744000  | -1.733231000 | 6 | 5.927153000   | 1.018149000   | -1.785295000 |
| 1 | 5.277461000   | 0.251099000   | -2.191162000 | 1 | 5.110466000   | 1.538194000   | -2.288586000 |
| 6 | 6.167575000   | -1.708955000  | -2.231791000 | 6 | 6.359277000   | -0.219437000  | -2.255273000 |
| 1 | 5.554188000   | -2.041212000  | -3.071283000 | 1 | 5.868718000   | -0.669510000  | -3.119752000 |
| 6 | 7.102275000   | -2.574357000  | -1.663864000 | 6 | 7.405154000   | -0.885709000  | -1.619997000 |
| 6 | 7.865435000   | -2.132548000  | -0.581167000 | 6 | 8.011894000   | -0.303465000  | -0.505145000 |
| 1 | 8.595058000   | -2.800952000  | -0.116710000 | 1 | 8.827364000   | -0.820132000  | 0.006664000  |
| 6 | 7.695554000   | -0.846197000  | -0.077138000 | 6 | 7.574405000   | 0.930392000   | -0.032246000 |
| 1 | 8.291698000   | -0.513671000  | 0.775245000  | 1 | 8.047771000   | 1.380273000   | 0.843169000  |
| 6 | 3.481190000   | 0.055366000   | -0.105030000 | 6 | 3.363439000   | 0.881311000   | -0.167414000 |
| 6 | 2.894660000   | -1.029977000  | -0.149752000 | 6 | 3.050116000   | -0.317631000  | -0.198888000 |
| 6 | 2.171464000   | -2.180913000  | -0.151389000 | 6 | 2.630161000   | -1.600064000  | -0.195787000 |
| 6 | 1.466699000   | -3.189218000  | -0.127106000 | 6 | 2.174690000   | -2.752489000  | -0.158310000 |
| 6 | 2.953879000   | -6.166866000  | -0.133035000 | 6 | 4.318910000   | -5.308641000  | -0.180679000 |
| 6 | 3.899371000   | -6.614053000  | -1.072436000 | 6 | 5.342468000   | -5.558541000  | -1.112011000 |
| 6 | 3.386553000   | -5.291302000  | 0.874181000  | 6 | 4.558692000   | -4.351446000  | 0.817670000  |
| 6 | 5.222585000   | -6.188010000  | -1.013389000 | 6 | 6.555733000   | -4.879989000  | -1.045375000 |
| 1 | 3.578859000   | -7.298036000  | -1.861279000 | 1 | 5.173180000   | -6.299001000  | -1.896634000 |
| 6 | 4.708082000   | -4.852767000  | 0.925556000  | 6 | 5.766959000   | -3.660691000  | 0.877018000  |
| 1 | 2.669146000   | -4.946453000  | 1.620448000  | 1 | 3.779164000   | -4.149095000  | 1.553587000  |
| 6 | 5.632591000   | -5.302263000  | -0.014444000 | 6 | 6.774599000   | -3.928176000  | -0.047706000 |
| 1 | 5.937893000   | -6.538535000  | -1.760617000 | 1 | 7.333929000   | -5.089337000  | -1.782867000 |
| 1 | 5.014571000   | -4.146592000  | 1.698797000  | 1 | 5.919574000   | -2.903972000  | 1.648355000  |
| 1 | 9.752311000   | 6.713594000   | -0.990614000 | 1 | 7.899769000   | 8.807619000   | -1.042095000 |
| 1 | 11.049858000  | 4.068764000   | 1.409264000  | 1 | 9.866150000   | 6.487317000   | 1.232727000  |
| 1 | 7.225506000   | -3.585266000  | -2.056764000 | 1 | 7.736174000   | -1.858540000  | -1.986756000 |
| 1 | 6.664723000   | -4.952176000  | 0.026999000  | 1 | 7.722049000   | -3.389628000  | 0.006385000  |
| 1 | 0.638043000   | -11.840910000 | -1.192088000 | 1 | 3.335514000   | -11.353738000 | -1.229437000 |
| 1 | -1.570098000  | -11.608726000 | 1.955988000  | 1 | 1.261552000   | -11.626540000 | 2.003929000  |
| 1 | -6.894499000  | -4.171774000  | 0.576184000  | 1 | -5.737935000  | -5.789217000  | 0.671175000  |
| 1 | -7.935283000  | -3.051368000  | -1.564492000 | 1 | -6.983380000  | -4.853672000  | -1.353219000 |
| 1 | -10.521857000 | 5.231198000   | 1.485361000  | 1 | -11.516822000 | 2.664597000   | 1.245202000  |
| 1 | -9.247547000  | 7.339304000   | -1.474494000 | 1 | -10.657950000 | 5.040873000   | -1.659135000 |
| 1 | -0.220978000  | 8.134602000   | -0.141898000 | 1 | -2.058849000  | 7.830143000   | 0.091237000  |

|                        |              |              |              |                        |              |               |              |
|------------------------|--------------|--------------|--------------|------------------------|--------------|---------------|--------------|
| 1                      | 1.290433000  | 8.220986000  | 1.897484000  | 1                      | -0.629263000 | 8.216740000   | 2.211353000  |
| <b>3b</b>              |              |              |              | <b>3b</b>              |              |               |              |
| <b>m06-2x/def2-SVP</b> |              |              |              | <b>m06-2x/def2-SVP</b> |              |               |              |
| <b>0 1</b>             |              |              |              | <b>0 3</b>             |              |               |              |
| 6                      | -1.410805000 | 4.015285000  | -0.047916000 | 6                      | 0.994040000  | -4.155365000  | 0.016530000  |
| 6                      | -0.051206000 | 4.204964000  | 0.155637000  | 6                      | -0.382504000 | -4.216405000  | 0.150854000  |
| 6                      | -0.214568000 | 5.680659000  | 0.277565000  | 6                      | -0.365437000 | -5.700381000  | 0.271304000  |
| 6                      | -1.679873000 | 5.476540000  | -0.040123000 | 6                      | 1.126685000  | -5.632905000  | 0.026848000  |
| 6                      | -2.799268000 | 6.189264000  | -0.324200000 | 6                      | 2.188964000  | -6.443387000  | -0.215824000 |
| 6                      | -2.782323000 | 7.641791000  | -0.605888000 | 6                      | 2.057222000  | -7.885715000  | -0.517733000 |
| 6                      | -3.828982000 | 8.472636000  | -0.179964000 | 6                      | 3.008189000  | -8.808801000  | -0.058620000 |
| 1                      | -4.677686000 | 8.036695000  | 0.350458000  | 1                      | 3.866221000  | -8.453534000  | 0.515230000  |
| 6                      | -3.780571000 | 9.847497000  | -0.396362000 | 6                      | 2.852210000  | -10.171832000 | -0.298077000 |
| 1                      | -4.597060000 | 10.478127000 | -0.036546000 | 1                      | 3.594488000  | -10.874664000 | 0.087798000  |
| 6                      | -2.697344000 | 10.436330000 | -1.056302000 | 6                      | 1.753991000  | -10.657228000 | -1.014882000 |
| 6                      | -1.670765000 | 9.599681000  | -1.512771000 | 6                      | 0.824576000  | -9.729800000  | -1.503037000 |
| 1                      | -0.817511000 | 10.035817000 | -2.037881000 | 1                      | -0.038162000 | -10.084558000 | -2.072130000 |
| 6                      | -1.712115000 | 8.228653000  | -1.298377000 | 6                      | 0.973244000  | -8.369993000  | -1.265862000 |
| 1                      | -0.900057000 | 7.593743000  | -1.657865000 | 1                      | 0.235807000  | -7.663167000  | -1.651063000 |
| 6                      | 0.622063000  | 6.641213000  | 0.743118000  | 6                      | -1.307495000 | -6.586052000  | 0.680924000  |
| 6                      | 0.187111000  | 8.009896000  | 1.106445000  | 6                      | -1.009720000 | -7.990982000  | 1.046416000  |
| 6                      | -1.013273000 | 8.240580000  | 1.792181000  | 6                      | 0.127950000  | -8.329399000  | 1.791606000  |
| 1                      | -1.637808000 | 7.390302000  | 2.072949000  | 1                      | 0.804829000  | -7.537740000  | 2.118627000  |
| 6                      | -1.414118000 | 9.534025000  | 2.102290000  | 6                      | 0.403197000  | -9.655473000  | 2.101278000  |
| 1                      | -2.361120000 | 9.692111000  | 2.624032000  | 1                      | 1.304576000  | -9.898226000  | 2.669308000  |
| 6                      | -0.634740000 | 10.640711000 | 1.743393000  | 6                      | -0.444769000 | -10.688830000 | 1.684432000  |
| 6                      | 0.577890000  | 10.406895000 | 1.086641000  | 6                      | -1.596957000 | -10.346626000 | 0.968968000  |
| 1                      | 1.208586000  | 11.253737000 | 0.805907000  | 1                      | -2.279823000 | -11.134399000 | 0.642012000  |
| 6                      | 0.991012000  | 9.111814000  | 0.784323000  | 6                      | -1.883622000 | -9.018257000  | 0.664986000  |
| 1                      | 1.942048000  | 8.946877000  | 0.273569000  | 1                      | -2.788399000 | -8.768743000  | 0.106697000  |
| 6                      | 2.044402000  | 6.305376000  | 1.018123000  | 6                      | -2.709494000 | -6.134918000  | 0.885783000  |
| 6                      | 2.609768000  | 6.664742000  | 2.251013000  | 6                      | -3.379224000 | -6.487281000  | 2.067346000  |
| 1                      | 2.014914000  | 7.240379000  | 2.962966000  | 1                      | -2.877950000 | -7.130784000  | 2.792939000  |
| 6                      | 3.898983000  | 6.265779000  | 2.584880000  | 6                      | -4.655170000 | -6.003744000  | 2.333346000  |
| 1                      | 4.310015000  | 6.534749000  | 3.560419000  | 1                      | -5.149583000 | -6.275227000  | 3.268674000  |

|   |              |              |              |   |               |              |              |
|---|--------------|--------------|--------------|---|---------------|--------------|--------------|
| 6 | 4.670306000  | 5.500732000  | 1.702387000  | 6 | -5.308676000  | -5.155270000 | 1.432806000  |
| 6 | 4.119545000  | 5.178780000  | 0.456161000  | 6 | -4.652894000  | -4.831149000 | 0.239042000  |
| 1 | 4.696551000  | 4.567115000  | -0.242457000 | 1 | -5.135899000  | -4.155362000 | -0.472083000 |
| 6 | 2.834120000  | 5.587924000  | 0.111706000  | 6 | -3.381856000  | -5.326615000 | -0.039400000 |
| 1 | 2.423405000  | 5.326646000  | -0.865164000 | 1 | -2.892159000  | -5.069141000 | -0.980048000 |
| 6 | 0.986009000  | 3.268469000  | 0.197736000  | 6 | -1.326450000  | -3.179084000 | 0.152306000  |
| 6 | 1.844238000  | 2.394021000  | 0.160701000  | 6 | -2.084419000  | -2.217810000 | 0.086222000  |
| 6 | 2.768982000  | 1.395229000  | 0.085479000  | 6 | -2.892217000  | -1.124715000 | -0.009565000 |
| 6 | 3.545207000  | 0.450093000  | -0.004979000 | 6 | -3.566159000  | -0.098739000 | -0.103063000 |
| 6 | 4.239144000  | -0.760784000 | -0.100750000 | 6 | -4.124486000  | 1.166882000  | -0.185632000 |
| 6 | 3.723984000  | -2.048754000 | -0.054993000 | 6 | -3.436401000  | 2.453196000  | -0.114196000 |
| 6 | 5.072230000  | -2.659528000 | -0.207801000 | 6 | -4.750580000  | 3.154703000  | -0.201723000 |
| 6 | 5.637863000  | -1.254365000 | -0.186421000 | 6 | -5.422829000  | 1.797953000  | -0.202223000 |
| 6 | 6.833300000  | -0.611756000 | -0.158809000 | 6 | -6.697243000  | 1.257518000  | -0.165231000 |
| 6 | 6.906655000  | 0.853578000  | -0.404322000 | 6 | -6.906721000  | -0.159510000 | -0.536463000 |
| 6 | 6.168375000  | 1.452577000  | -1.435660000 | 6 | -6.223797000  | -0.739175000 | -1.619518000 |
| 1 | 5.492654000  | 0.839483000  | -2.035023000 | 1 | -5.493340000  | -0.144568000 | -2.170835000 |
| 6 | 6.321655000  | 2.804099000  | -1.733524000 | 6 | -6.498193000  | -2.040906000 | -2.025881000 |
| 1 | 5.747172000  | 3.239494000  | -2.555021000 | 1 | -5.964893000  | -2.456433000 | -2.884320000 |
| 6 | 7.223503000  | 3.605724000  | -1.023226000 | 6 | -7.468815000  | -2.815553000 | -1.377328000 |
| 6 | 7.951022000  | 3.008982000  | 0.013646000  | 6 | -8.139573000  | -2.243637000 | -0.289155000 |
| 1 | 8.658660000  | 3.612359000  | 0.587241000  | 1 | -8.897721000  | -2.826470000 | 0.239159000  |
| 6 | 7.797584000  | 1.660704000  | 0.319880000  | 6 | -7.864424000  | -0.946123000 | 0.127461000  |
| 1 | 8.390575000  | 1.215096000  | 1.120702000  | 1 | -8.407379000  | -0.522904000 | 0.974255000  |
| 6 | 8.114240000  | -1.311925000 | 0.089570000  | 6 | -7.877109000  | 2.045788000  | 0.222399000  |
| 6 | 9.288441000  | -0.934033000 | -0.578338000 | 6 | -9.137622000  | 1.807320000  | -0.353128000 |
| 1 | 9.260293000  | -0.101320000 | -1.283664000 | 1 | -9.247666000  | 1.014105000  | -1.094361000 |
| 6 | 10.478565000 | -1.627695000 | -0.375577000 | 6 | -10.234981000 | 2.596385000  | -0.023233000 |
| 1 | 11.375836000 | -1.328766000 | -0.922716000 | 1 | -11.198096000 | 2.405447000  | -0.502520000 |
| 6 | 10.541233000 | -2.710016000 | 0.507971000  | 6 | -10.121574000 | 3.642813000  | 0.898250000  |
| 6 | 9.375677000  | -3.063580000 | 1.199313000  | 6 | -8.872936000  | 3.859907000  | 1.496563000  |
| 1 | 9.401625000  | -3.901441000 | 1.900234000  | 1 | -8.760891000  | 4.667229000  | 2.224243000  |
| 6 | 8.185454000  | -2.376638000 | 1.000369000  | 6 | -7.773722000  | 3.079572000  | 1.170180000  |
| 1 | 7.286312000  | -2.669973000 | 1.545710000  | 1 | -6.809196000  | 3.271171000  | 1.644183000  |
| 6 | 5.449065000  | -3.934296000 | -0.477825000 | 6 | -5.040628000  | 4.459969000  | -0.439161000 |
| 6 | 6.804998000  | -4.320069000 | -0.932380000 | 6 | -6.387738000  | 4.957958000  | -0.800870000 |

|   |              |              |              |   |              |             |              |
|---|--------------|--------------|--------------|---|--------------|-------------|--------------|
| 6 | 7.507405000  | -3.552455000 | -1.871316000 | 6 | -7.205261000 | 4.273621000 | -1.710326000 |
| 1 | 7.042588000  | -2.651320000 | -2.276221000 | 1 | -6.837812000 | 3.353306000 | -2.168897000 |
| 6 | 8.782832000  | -3.923999000 | -2.277644000 | 6 | -8.472413000 | 4.750720000 | -2.021496000 |
| 1 | 9.318092000  | -3.303503000 | -3.000497000 | 1 | -9.098447000 | 4.194268000 | -2.723291000 |
| 6 | 9.401960000  | -5.071115000 | -1.766049000 | 6 | -8.970272000 | 5.922044000 | -1.437518000 |
| 6 | 8.688788000  | -5.851087000 | -0.849785000 | 6 | -8.141341000 | 6.620557000 | -0.553262000 |
| 1 | 9.146994000  | -6.755925000 | -0.443516000 | 1 | -8.502776000 | 7.543759000 | -0.094084000 |
| 6 | 7.405058000  | -5.490639000 | -0.448310000 | 6 | -6.864567000 | 6.155647000 | -0.249813000 |
| 1 | 6.860822000  | -6.113458000 | 0.264672000  | 1 | -6.228714000 | 6.715422000 | 0.439199000  |
| 6 | 4.441169000  | -5.026221000 | -0.418945000 | 6 | -3.950972000 | 5.471274000 | -0.443433000 |
| 6 | 3.539885000  | -5.157244000 | 0.645153000  | 6 | -2.962373000 | 5.520941000 | 0.547659000  |
| 1 | 3.609430000  | -4.472430000 | 1.492339000  | 1 | -3.018001000 | 4.833974000 | 1.393604000  |
| 6 | 2.550300000  | -6.136235000 | 0.623265000  | 6 | -1.905885000 | 6.422956000 | 0.454666000  |
| 1 | 1.827184000  | -6.191370000 | 1.441539000  | 1 | -1.118357000 | 6.411536000 | 1.213210000  |
| 6 | 2.445437000  | -7.033075000 | -0.446313000 | 6 | -1.816593000 | 7.323041000 | -0.614049000 |
| 6 | 3.374171000  | -6.927516000 | -1.487838000 | 6 | -2.828506000 | 7.300769000 | -1.580188000 |
| 1 | 3.315822000  | -7.620886000 | -2.329713000 | 1 | -2.783112000 | 7.997848000 | -2.419798000 |
| 6 | 4.357055000  | -5.944707000 | -1.476249000 | 6 | -3.878985000 | 6.394277000 | -1.498126000 |
| 1 | 5.062635000  | -5.869148000 | -2.305902000 | 1 | -4.649475000 | 6.382217000 | -2.271398000 |
| 6 | 2.395241000  | -2.471057000 | 0.051144000  | 6 | -2.132035000 | 2.731256000 | -0.021513000 |
| 6 | 1.204515000  | -2.742274000 | 0.158063000  | 6 | -0.878387000 | 2.876151000 | 0.094247000  |
| 6 | -0.131571000 | -2.998916000 | 0.246909000  | 6 | 0.418075000  | 2.991282000 | 0.200178000  |
| 6 | -1.346261000 | -3.164395000 | 0.282588000  | 6 | 1.683321000  | 3.047512000 | 0.258437000  |
| 6 | -2.742407000 | -3.175287000 | 0.199181000  | 6 | 3.013623000  | 2.918327000 | 0.229930000  |
| 6 | -3.594639000 | -2.149964000 | -0.190592000 | 6 | 3.829015000  | 1.750435000 | -0.089720000 |
| 6 | -4.784150000 | -3.034330000 | -0.151741000 | 6 | 5.040520000  | 2.527662000 | -0.103647000 |
| 6 | -3.861299000 | -4.149009000 | 0.298424000  | 6 | 4.245216000  | 3.759843000 | 0.268871000  |
| 6 | -3.901185000 | -5.468002000 | 0.616459000  | 6 | 4.417552000  | 5.087991000 | 0.495773000  |
| 6 | -2.734239000 | -6.129236000 | 1.258824000  | 6 | 3.316877000  | 5.907970000 | 1.071081000  |
| 6 | -1.987297000 | -5.488417000 | 2.258107000  | 6 | 2.520391000  | 5.431751000 | 2.123158000  |
| 1 | -2.253590000 | -4.473652000 | 2.558767000  | 1 | 2.685306000  | 4.423095000 | 2.504985000  |
| 6 | -0.939429000 | -6.143237000 | 2.900515000  | 6 | 1.550205000  | 6.240117000 | 2.708487000  |
| 1 | -0.383607000 | -5.621931000 | 3.683554000  | 1 | 0.954498000  | 5.846562000 | 3.535711000  |
| 6 | -0.610067000 | -7.466839000 | 2.586427000  | 6 | 1.347922000  | 7.558027000 | 2.279999000  |
| 6 | -1.361198000 | -8.108298000 | 1.593655000  | 6 | 2.144172000  | 8.032389000 | 1.231215000  |
| 1 | -1.129633000 | -9.143406000 | 1.331308000  | 1 | 2.011178000  | 9.057933000 | 0.878681000  |

|   |               |              |              |   |              |              |              |
|---|---------------|--------------|--------------|---|--------------|--------------|--------------|
| 6 | -2.399247000  | -7.454999000 | 0.938757000  | 6 | 3.107984000  | 7.225377000  | 0.634875000  |
| 1 | -2.973876000  | -7.981150000 | 0.174427000  | 1 | 3.724155000  | 7.624419000  | -0.172919000 |
| 6 | -5.082386000  | -6.320106000 | 0.344937000  | 6 | 5.682772000  | 5.798598000  | 0.201484000  |
| 6 | -5.509667000  | -7.283960000 | 1.269567000  | 6 | 6.179043000  | 6.781126000  | 1.070990000  |
| 1 | -4.963658000  | -7.405453000 | 2.207298000  | 1 | 5.620255000  | 7.026118000  | 1.976392000  |
| 6 | -6.631396000  | -8.067876000 | 1.013625000  | 6 | 7.383767000  | 7.425581000  | 0.804219000  |
| 1 | -6.958530000  | -8.799166000 | 1.756570000  | 1 | 7.762219000  | 8.172567000  | 1.506071000  |
| 6 | -7.351965000  | -7.928889000 | -0.177464000 | 6 | 8.122494000  | 7.126618000  | -0.345698000 |
| 6 | -6.905313000  | -6.986457000 | -1.111612000 | 6 | 7.607197000  | 6.170564000  | -1.229665000 |
| 1 | -7.449824000  | -6.862660000 | -2.050807000 | 1 | 8.163148000  | 5.925328000  | -2.137806000 |
| 6 | -5.790189000  | -6.197541000 | -0.859305000 | 6 | 6.409894000  | 5.518356000  | -0.964530000 |
| 1 | -5.457923000  | -5.464776000 | -1.597500000 | 1 | 6.026201000  | 4.771318000  | -1.662555000 |
| 6 | -6.089564000  | -2.763971000 | -0.411085000 | 6 | 6.348169000  | 2.129373000  | -0.346267000 |
| 6 | -7.214515000  | -3.630508000 | -0.000254000 | 6 | 7.521052000  | 2.891645000  | 0.098890000  |
| 6 | -7.194441000  | -4.290765000 | 1.237530000  | 6 | 7.491904000  | 3.621468000  | 1.300796000  |
| 1 | -6.332723000  | -4.157914000 | 1.894890000  | 1 | 6.584545000  | 3.607047000  | 1.907937000  |
| 6 | -8.249709000  | -5.106107000 | 1.624234000  | 6 | 8.594433000  | 4.353448000  | 1.715720000  |
| 1 | -8.206615000  | -5.619765000 | 2.587675000  | 1 | 8.542490000  | 4.920275000  | 2.648350000  |
| 6 | -9.364746000  | -5.289885000 | 0.796565000  | 6 | 9.769586000  | 4.391813000  | 0.952860000  |
| 6 | -9.392787000  | -4.616764000 | -0.429233000 | 6 | 9.807604000  | 3.652487000  | -0.234584000 |
| 1 | -10.253128000 | -4.742248000 | -1.090918000 | 1 | 10.712470000 | 3.666749000  | -0.846724000 |
| 6 | -8.341074000  | -3.791437000 | -0.819490000 | 6 | 8.709237000  | 2.907435000  | -0.652284000 |
| 1 | -8.381584000  | -3.275524000 | -1.780851000 | 1 | 8.757010000  | 2.348553000  | -1.588571000 |
| 6 | -6.427304000  | -1.514111000 | -1.143195000 | 6 | 6.576499000  | 0.855069000  | -1.059923000 |
| 6 | -5.695811000  | -1.132230000 | -2.276118000 | 6 | 5.784600000  | 0.491214000  | -2.162110000 |
| 1 | -4.874238000  | -1.764537000 | -2.618458000 | 1 | 4.993091000  | 1.164470000  | -2.495860000 |
| 6 | -6.013760000  | 0.026869000  | -2.976928000 | 6 | 6.007274000  | -0.699520000 | -2.842504000 |
| 1 | -5.426412000  | 0.301212000  | -3.855861000 | 1 | 5.376792000  | -0.954933000 | -3.696890000 |
| 6 | -7.081614000  | 0.838290000  | -2.582333000 | 6 | 7.033422000  | -1.571105000 | -2.459710000 |
| 6 | -7.830265000  | 0.441251000  | -1.466036000 | 6 | 7.838690000  | -1.199750000 | -1.374996000 |
| 1 | -8.684032000  | 1.045544000  | -1.151995000 | 1 | 8.657308000  | -1.853828000 | -1.066991000 |
| 6 | -7.512506000  | -0.712579000 | -0.757567000 | 6 | 7.617203000  | -0.012991000 | -0.685682000 |
| 1 | -8.111811000  | -1.004960000 | 0.107011000  | 1 | 8.254017000  | 0.251441000  | 0.160469000  |
| 6 | -3.340795000  | -0.783714000 | -0.351697000 | 6 | 3.454805000  | 0.417175000  | -0.188119000 |
| 6 | -3.018549000  | 0.398841000  | -0.381529000 | 6 | 2.996268000  | -0.723283000 | -0.212914000 |
| 6 | -2.579520000  | 1.689615000  | -0.335914000 | 6 | 2.411915000  | -1.956530000 | -0.186328000 |

|   |               |              |              |   |              |               |              |
|---|---------------|--------------|--------------|---|--------------|---------------|--------------|
| 6 | -2.111535000  | 2.818192000  | -0.232688000 | 6 | 1.820457000  | -3.027457000  | -0.119262000 |
| 6 | -4.122212000  | 5.510915000  | -0.338584000 | 6 | 3.564660000  | -5.881976000  | -0.174621000 |
| 6 | -5.078311000  | 5.805275000  | -1.323546000 | 6 | 4.525144000  | -6.247387000  | -1.130901000 |
| 6 | -4.478795000  | 4.618084000  | 0.680438000  | 6 | 3.958136000  | -5.022785000  | 0.860042000  |
| 6 | -6.344879000  | 5.233751000  | -1.278357000 | 6 | 5.828390000  | -5.769893000  | -1.048261000 |
| 1 | -4.822025000  | 6.501198000  | -2.124783000 | 1 | 4.241051000  | -6.920618000  | -1.942079000 |
| 6 | -5.746210000  | 4.042456000  | 0.717148000  | 6 | 5.262009000  | -4.540329000  | 0.933264000  |
| 1 | -3.758540000  | 4.392630000  | 1.469237000  | 1 | 3.233908000  | -4.746302000  | 1.628675000  |
| 6 | -6.707126000  | 4.353239000  | -0.248899000 | 6 | 6.223391000  | -4.915079000  | -0.009653000 |
| 1 | -7.076009000  | 5.484758000  | -2.051162000 | 1 | 6.560916000  | -6.073576000  | -1.800570000 |
| 1 | -6.000270000  | 3.353945000  | 1.525870000  | 1 | 5.542395000  | -3.872216000  | 1.750440000  |
| 6 | -10.497335000 | -6.177319000 | 1.238914000  | 6 | 10.946559000 | 5.205075000   | 1.418805000  |
| 1 | -11.053520000 | -5.719643000 | 2.071434000  | 1 | 11.380967000 | 4.779109000   | 2.336164000  |
| 1 | -11.207104000 | -6.362519000 | 0.421559000  | 1 | 11.736672000 | 5.244459000   | 0.657181000  |
| 1 | -10.116672000 | -7.146733000 | 1.594271000  | 1 | 10.637838000 | 6.235562000   | 1.652124000  |
| 6 | -8.570248000  | -8.763182000 | -0.469054000 | 6 | 9.431790000  | 7.805313000   | -0.646254000 |
| 1 | -8.381743000  | -9.459324000 | -1.300517000 | 1 | 9.353711000  | 8.432272000   | -1.547400000 |
| 1 | -8.872499000  | -9.354982000 | 0.405261000  | 1 | 9.754138000  | 8.446224000   | 0.185181000  |
| 1 | -9.415786000  | -8.123087000 | -0.763831000 | 1 | 10.219451000 | 7.059528000   | -0.834387000 |
| 6 | -7.404422000  | 2.105157000  | -3.327953000 | 6 | 7.247291000  | -2.872981000  | -3.182590000 |
| 1 | -8.481166000  | 2.323980000  | -3.297741000 | 1 | 8.293883000  | -3.201358000  | -3.115413000 |
| 1 | -6.871381000  | 2.959762000  | -2.880147000 | 1 | 6.614245000  | -3.661444000  | -2.743783000 |
| 1 | -7.095395000  | 2.037254000  | -4.379653000 | 1 | 6.978621000  | -2.787422000  | -4.244235000 |
| 6 | -8.107413000  | 3.809972000  | -0.152061000 | 6 | 7.652654000  | -4.462004000  | 0.121660000  |
| 1 | -8.526386000  | 3.603982000  | -1.146910000 | 1 | 8.132256000  | -4.364217000  | -0.862250000 |
| 1 | -8.133413000  | 2.883628000  | 0.436684000  | 1 | 7.715711000  | -3.494894000  | 0.638005000  |
| 1 | -8.770730000  | 4.539333000  | 0.339072000  | 1 | 8.238049000  | -5.192183000  | 0.702615000  |
| 6 | -2.618110000  | 11.922068000 | -1.282809000 | 6 | 1.558360000  | -12.127808000 | -1.268420000 |
| 1 | -2.658917000  | 12.161032000 | -2.356335000 | 1 | 1.627757000  | -12.356572000 | -2.342716000 |
| 1 | -3.443038000  | 12.450203000 | -0.786303000 | 1 | 2.311427000  | -12.731035000 | -0.744008000 |
| 1 | -1.668248000  | 12.321375000 | -0.895052000 | 1 | 0.561076000  | -12.448577000 | -0.929863000 |
| 6 | -1.102348000  | 12.033038000 | 2.073279000  | 6 | -0.110916000 | -12.119230000 | 2.013808000  |
| 1 | -1.113340000  | 12.198532000 | 3.161350000  | 1 | -0.156367000 | -12.296013000 | 3.099165000  |
| 1 | -0.451800000  | 12.794121000 | 1.622087000  | 1 | -0.805460000 | -12.817405000 | 1.527788000  |
| 1 | -2.128267000  | 12.193822000 | 1.708021000  | 1 | 0.911195000  | -12.363218000 | 1.685556000  |
| 6 | 6.046169000   | 5.023753000  | 2.081753000  | 6 | -6.670256000 | -4.593561000  | 1.740367000  |

|   |              |              |              |   |               |              |              |
|---|--------------|--------------|--------------|---|---------------|--------------|--------------|
| 1 | 6.118610000  | 3.930249000  | 1.987711000  | 1 | -6.638714000  | -3.494401000 | 1.773302000  |
| 1 | 6.813325000  | 5.454875000  | 1.420012000  | 1 | -7.399286000  | -4.871885000 | 0.964109000  |
| 1 | 6.292456000  | 5.302159000  | 3.114872000  | 1 | -7.042530000  | -4.959440000 | 2.706325000  |
| 6 | 7.400471000  | 5.061428000  | -1.366632000 | 6 | -7.774643000  | -4.217154000 | -1.834685000 |
| 1 | 6.539667000  | 5.657975000  | -1.022572000 | 1 | -7.001384000  | -4.924263000 | -1.491971000 |
| 1 | 8.303565000  | 5.473958000  | -0.897319000 | 1 | -8.740132000  | -4.562138000 | -1.441077000 |
| 1 | 7.481497000  | 5.204300000  | -2.453487000 | 1 | -7.807363000  | -4.277505000 | -2.931534000 |
| 6 | 10.791684000 | -5.441515000 | -2.210468000 | 6 | -10.357689000 | 6.401537000  | -1.770733000 |
| 1 | 11.188116000 | -6.286489000 | -1.631756000 | 1 | -10.637952000 | 7.275267000  | -1.167388000 |
| 1 | 10.803803000 | -5.724099000 | -3.274157000 | 1 | -10.434547000 | 6.682891000  | -2.831894000 |
| 1 | 11.477068000 | -4.588400000 | -2.091372000 | 1 | -11.096252000 | 5.605245000  | -1.589845000 |
| 6 | 11.812735000 | -3.485243000 | 0.724994000  | 6 | -11.289374000 | 4.524673000  | 1.246717000  |
| 1 | 12.612174000 | -3.145098000 | 0.053334000  | 1 | -12.179249000 | 4.268154000  | 0.656743000  |
| 1 | 12.169668000 | -3.377654000 | 1.760425000  | 1 | -11.548738000 | 4.434575000  | 2.312362000  |
| 1 | 11.644610000 | -4.558699000 | 0.547119000  | 1 | -11.042529000 | 5.581340000  | 1.059090000  |
| 6 | 1.351777000  | -8.065282000 | -0.480159000 | 6 | -0.654320000  | 8.271288000  | -0.727159000 |
| 1 | 1.324335000  | -8.646169000 | 0.453756000  | 1 | -0.527473000  | 8.855765000  | 0.196252000  |
| 1 | 0.367915000  | -7.583873000 | -0.586831000 | 1 | 0.283005000   | 7.717668000  | -0.887767000 |
| 1 | 1.487787000  | -8.763184000 | -1.316850000 | 1 | -0.790845000  | 8.970919000  | -1.562312000 |
| 6 | 0.515692000  | -8.177578000 | 3.290872000  | 6 | 0.308666000   | 8.433243000  | 2.930282000  |
| 1 | 0.392327000  | -9.267637000 | 3.237530000  | 1 | 0.474004000   | 9.492181000  | 2.690416000  |
| 1 | 1.488893000  | -7.931918000 | 2.834895000  | 1 | -0.705437000  | 8.167898000  | 2.589415000  |
| 1 | 0.569407000  | -7.886915000 | 4.349041000  | 1 | 0.323714000   | 8.321060000  | 4.023490000  |

**3b**

**m06-2x/def2-SVP**

**-2 1**

|   |              |               |              |
|---|--------------|---------------|--------------|
| 6 | 0.211127000  | -4.291822000  | 0.011757000  |
| 6 | -1.162334000 | -4.067413000  | 0.140669000  |
| 6 | -1.439554000 | -5.524686000  | 0.241329000  |
| 6 | 0.031472000  | -5.756666000  | -0.024485000 |
| 6 | 0.895093000  | -6.779103000  | -0.293954000 |
| 6 | 0.447580000  | -8.140858000  | -0.655250000 |
| 6 | 1.173364000  | -9.279292000  | -0.267674000 |
| 1 | 2.099642000  | -9.151878000  | 0.295822000  |
| 6 | 0.712657000  | -10.561354000 | -0.558718000 |

**3b**

**m06-2x/def2-SVP**

**-2 3**

|   |              |              |              |
|---|--------------|--------------|--------------|
| 6 | -0.574364000 | 4.242009000  | -0.002867000 |
| 6 | 0.841922000  | 4.129138000  | 0.162614000  |
| 6 | 0.985060000  | 5.595328000  | 0.263132000  |
| 6 | -0.499209000 | 5.708220000  | -0.039306000 |
| 6 | -1.430950000 | 6.670108000  | -0.327540000 |
| 6 | -1.078879000 | 8.057341000  | -0.691019000 |
| 6 | -1.893361000 | 9.144661000  | -0.329965000 |
| 1 | -2.819210000 | 8.955473000  | 0.216623000  |
| 6 | -1.522192000 | 10.454874000 | -0.622966000 |

|   |              |               |              |   |              |              |              |
|---|--------------|---------------|--------------|---|--------------|--------------|--------------|
| 1 | 1.287953000  | -11.428747000 | -0.222990000 | 1 | -2.166838000 | 11.279907000 | -0.306315000 |
| 6 | -0.483455000 | -10.759413000 | -1.254725000 | 6 | -0.328147000 | 10.736287000 | -1.293241000 |
| 6 | -1.188554000 | -9.625251000  | -1.675253000 | 6 | 0.466716000  | 9.653146000  | -1.687821000 |
| 1 | -2.124882000 | -9.749637000  | -2.225959000 | 1 | 1.404523000  | 9.841581000  | -2.217672000 |
| 6 | -0.730249000 | -8.344834000  | -1.394599000 | 6 | 0.097089000  | 8.344698000  | -1.406781000 |
| 1 | -1.299077000 | -7.475235000  | -1.728833000 | 1 | 0.736708000  | 7.517221000  | -1.719254000 |
| 6 | -2.540322000 | -6.216179000  | 0.642183000  | 6 | 2.011936000  | 6.391760000  | 0.683789000  |
| 6 | -2.527580000 | -7.658221000  | 0.985138000  | 6 | 1.868845000  | 7.826371000  | 1.019820000  |
| 6 | -1.463078000 | -8.239977000  | 1.689418000  | 6 | 0.742481000  | 8.322270000  | 1.694746000  |
| 1 | -0.627728000 | -7.609256000  | 1.998925000  | 1 | -0.046853000 | 7.625767000  | 1.983360000  |
| 6 | -1.451190000 | -9.601549000  | 1.967083000  | 6 | 0.611908000  | 9.678233000  | 1.968352000  |
| 1 | -0.595093000 | -10.033300000 | 2.492358000  | 1 | -0.290857000 | 10.038235000 | 2.469319000  |
| 6 | -2.502982000 | -10.434086000 | 1.568300000  | 6 | 1.601796000  | 10.595122000 | 1.596262000  |
| 6 | -3.585629000 | -9.848605000  | 0.904716000  | 6 | 2.745764000  | 10.099084000 | 0.963627000  |
| 1 | -4.425656000 | -10.474533000 | 0.591311000  | 1 | 3.540052000  | 10.791393000 | 0.670392000  |
| 6 | -3.603621000 | -8.483722000  | 0.626897000  | 6 | 2.881749000  | 8.740334000  | 0.688711000  |
| 1 | -4.455154000 | -8.043514000  | 0.103550000  | 1 | 3.779642000  | 8.372552000  | 0.187311000  |
| 6 | -3.820600000 | -5.497021000  | 0.884274000  | 6 | 3.342229000  | 5.788097000  | 0.962347000  |
| 6 | -4.526843000 | -5.720988000  | 2.076791000  | 6 | 4.014048000  | 6.094933000  | 2.157451000  |
| 1 | -4.153531000 | -6.465885000  | 2.782917000  | 1 | 3.572137000  | 6.822578000  | 2.841567000  |
| 6 | -5.663028000 | -4.980943000  | 2.385422000  | 6 | 5.203204000  | 5.458870000  | 2.497383000  |
| 1 | -6.177557000 | -5.153582000  | 3.334250000  | 1 | 5.688849000  | 5.696415000  | 3.447673000  |
| 6 | -6.137260000 | -3.988900000  | 1.519903000  | 6 | 5.768243000  | 4.487542000  | 1.663365000  |
| 6 | -5.457523000 | -3.792539000  | 0.312215000  | 6 | 5.120759000  | 4.207103000  | 0.454823000  |
| 1 | -5.790763000 | -3.002675000  | -0.366887000 | 1 | 5.521405000  | 3.428527000  | -0.200270000 |
| 6 | -4.331879000 | -4.546956000  | -0.009513000 | 6 | 3.943235000  | 4.860789000  | 0.100365000  |
| 1 | -3.812990000 | -4.369606000  | -0.952481000 | 1 | 3.454073000  | 4.619272000  | -0.843882000 |
| 6 | -1.891815000 | -2.883807000  | 0.161229000  | 6 | 1.654267000  | 3.016187000  | 0.191552000  |
| 6 | -2.466499000 | -1.793406000  | 0.096365000  | 6 | 2.315068000  | 1.968424000  | 0.137503000  |
| 6 | -3.062133000 | -0.582526000  | 0.009915000  | 6 | 2.998532000  | 0.807672000  | 0.053154000  |
| 6 | -3.526380000 | 0.564052000   | -0.068160000 | 6 | 3.560975000  | -0.293164000 | -0.034579000 |
| 6 | -3.833576000 | 1.903559000   | -0.147103000 | 6 | 3.968782000  | -1.610427000 | -0.130788000 |
| 6 | -2.899768000 | 3.031458000   | -0.109064000 | 6 | 3.174097000  | -2.796600000 | -0.118128000 |
| 6 | -4.061884000 | 3.966046000   | -0.199718000 | 6 | 4.374343000  | -3.647231000 | -0.247899000 |
| 6 | -4.993732000 | 2.764285000   | -0.134115000 | 6 | 5.214039000  | -2.382482000 | -0.175309000 |
| 6 | -6.355202000 | 2.516398000   | -0.070102000 | 6 | 6.533402000  | -2.011232000 | -0.109183000 |

|   |               |              |              |   |              |              |              |
|---|---------------|--------------|--------------|---|--------------|--------------|--------------|
| 6 | -6.869519000  | 1.167243000  | -0.400820000 | 6 | 6.921694000  | -0.602984000 | -0.377550000 |
| 6 | -6.309554000  | 0.398102000  | -1.439745000 | 6 | 6.316600000  | 0.137362000  | -1.408180000 |
| 1 | -5.445730000  | 0.789639000  | -1.979007000 | 1 | 5.509500000  | -0.318337000 | -1.983670000 |
| 6 | -6.845824000  | -0.831528000 | -1.805652000 | 6 | 6.743981000  | 1.424060000  | -1.720871000 |
| 1 | -6.383255000  | -1.390503000 | -2.624196000 | 1 | 6.251990000  | 1.965945000  | -2.533147000 |
| 6 | -7.973019000  | -1.360059000 | -1.162456000 | 6 | 7.800910000  | 2.029926000  | -1.030270000 |
| 6 | -8.527653000  | -0.608265000 | -0.121691000 | 6 | 8.397893000  | 1.301718000  | 0.004512000  |
| 1 | -9.399836000  | -0.996538000 | 0.412633000  | 1 | 9.217334000  | 1.751948000  | 0.571805000  |
| 6 | -7.985931000  | 0.616857000  | 0.257708000  | 6 | 7.965619000  | 0.018895000  | 0.329206000  |
| 1 | -8.443841000  | 1.174717000  | 1.076668000  | 1 | 8.454892000  | -0.526096000 | 1.138839000  |
| 6 | -7.331791000  | 3.539327000  | 0.337317000  | 6 | 7.617799000  | -2.957011000 | 0.225150000  |
| 6 | -8.642633000  | 3.574095000  | -0.178669000 | 6 | 8.899768000  | -2.848089000 | -0.341785000 |
| 1 | -8.950672000  | 2.809908000  | -0.894729000 | 1 | 9.104320000  | -2.033871000 | -1.039635000 |
| 6 | -9.538671000  | 4.580151000  | 0.172405000  | 6 | 9.897582000  | -3.777426000 | -0.058658000 |
| 1 | -10.540835000 | 4.582813000  | -0.267111000 | 1 | 10.877085000 | -3.676640000 | -0.535071000 |
| 6 | -9.174472000  | 5.603655000  | 1.052819000  | 6 | 9.662187000  | -4.852196000 | 0.803970000  |
| 6 | -7.882804000  | 5.559488000  | 1.592262000  | 6 | 8.397372000  | -4.944350000 | 1.397074000  |
| 1 | -7.566424000  | 6.342055000  | 2.288011000  | 1 | 8.184197000  | -5.772463000 | 2.078632000  |
| 6 | -6.990607000  | 4.549697000  | 1.258576000  | 6 | 7.402219000  | -4.014458000 | 1.126694000  |
| 1 | -5.990955000  | 4.541234000  | 1.697334000  | 1 | 6.421973000  | -4.110576000 | 1.597381000  |
| 6 | -4.112014000  | 5.293458000  | -0.495281000 | 6 | 4.526727000  | -4.978939000 | -0.512139000 |
| 6 | -5.349819000  | 6.026254000  | -0.857161000 | 6 | 5.802579000  | -5.604039000 | -0.928319000 |
| 6 | -6.309392000  | 5.475541000  | -1.717453000 | 6 | 6.681411000  | -4.967579000 | -1.818444000 |
| 1 | -6.141839000  | 4.475970000  | -2.122904000 | 1 | 6.413048000  | -3.984124000 | -2.208988000 |
| 6 | -7.472694000  | 6.171300000  | -2.023913000 | 6 | 7.885684000  | -5.558809000 | -2.180323000 |
| 1 | -8.218520000  | 5.706445000  | -2.674105000 | 1 | 8.562243000  | -5.025595000 | -2.853763000 |
| 6 | -7.722891000  | 7.440975000  | -1.491672000 | 6 | 8.259623000  | -6.812889000 | -1.684298000 |
| 6 | -6.748496000  | 8.008700000  | -0.665435000 | 6 | 7.368642000  | -7.468155000 | -0.828756000 |
| 1 | -6.914961000  | 9.003719000  | -0.243427000 | 1 | 7.631159000  | -8.453015000 | -0.432131000 |
| 6 | -5.577344000  | 7.318637000  | -0.362021000 | 6 | 6.159821000  | -6.880053000 | -0.464313000 |
| 1 | -4.827210000  | 7.774809000  | 0.287581000  | 1 | 5.479380000  | -7.405361000 | 0.209335000  |
| 6 | -2.854689000  | 6.085043000  | -0.585248000 | 6 | 3.336047000  | -5.869757000 | -0.514582000 |
| 6 | -1.818022000  | 5.961799000  | 0.349073000  | 6 | 2.339954000  | -5.795171000 | 0.469801000  |
| 1 | -1.952486000  | 5.304633000  | 1.208363000  | 1 | 2.463454000  | -5.097055000 | 1.298442000  |
| 6 | -0.609724000  | 6.630987000  | 0.171997000  | 6 | 1.182964000  | -6.564510000 | 0.382657000  |
| 1 | 0.209498000   | 6.454576000  | 0.874582000  | 1 | 0.390315000  | -6.429444000 | 1.123962000  |

|   |              |             |              |   |              |              |              |
|---|--------------|-------------|--------------|---|--------------|--------------|--------------|
| 6 | -0.407805000 | 7.481799000 | -0.920482000 | 6 | 0.994398000  | -7.471711000 | -0.666200000 |
| 6 | -1.460765000 | 7.646232000 | -1.826615000 | 6 | 2.009816000  | -7.586176000 | -1.621474000 |
| 1 | -1.327569000 | 8.304837000 | -2.688877000 | 1 | 1.887011000  | -8.286799000 | -2.451708000 |
| 6 | -2.659912000 | 6.960361000 | -1.665743000 | 6 | 3.155022000  | -6.799932000 | -1.551671000 |
| 1 | -3.457782000 | 7.081357000 | -2.401309000 | 1 | 3.919367000  | -6.885074000 | -2.326872000 |
| 6 | -1.563748000 | 3.078023000 | -0.040912000 | 6 | 1.806147000  | -2.943206000 | -0.042892000 |
| 6 | -0.302457000 | 2.987702000 | 0.070861000  | 6 | 0.569874000  | -2.952873000 | 0.064419000  |
| 6 | 0.996474000  | 2.848735000 | 0.176409000  | 6 | -0.773682000 | -2.915444000 | 0.163121000  |
| 6 | 2.247232000  | 2.645868000 | 0.245263000  | 6 | -2.009269000 | -2.811703000 | 0.221121000  |
| 6 | 3.526385000  | 2.243692000 | 0.239832000  | 6 | -3.356543000 | -2.522690000 | 0.200994000  |
| 6 | 4.138821000  | 0.945745000 | -0.003936000 | 6 | -4.028391000 | -1.289126000 | -0.077611000 |
| 6 | 5.478790000  | 1.480875000 | 0.005122000  | 6 | -5.340408000 | -1.943588000 | -0.054000000 |
| 6 | 4.889836000  | 2.854004000 | 0.285186000  | 6 | -4.631635000 | -3.250008000 | 0.270597000  |
| 6 | 5.282022000  | 4.147715000 | 0.440721000  | 6 | -4.930167000 | -4.567797000 | 0.499617000  |
| 6 | 4.329007000  | 5.182308000 | 0.932443000  | 6 | -3.911482000 | -5.481771000 | 1.078067000  |
| 6 | 3.427507000  | 4.917410000 | 1.974885000  | 6 | -3.021996000 | -5.058549000 | 2.080831000  |
| 1 | 3.383563000  | 3.912277000 | 2.395457000  | 1 | -3.053461000 | -4.020707000 | 2.414587000  |
| 6 | 2.606294000  | 5.918433000 | 2.487176000  | 6 | -2.120291000 | -5.941839000 | 2.667621000  |
| 1 | 1.916644000  | 5.677069000 | 3.300104000  | 1 | -1.445607000 | -5.573907000 | 3.445131000  |
| 6 | 2.661171000  | 7.228237000 | 1.996200000  | 6 | -2.074757000 | -7.291482000 | 2.298033000  |
| 6 | 3.558271000  | 7.493890000 | 0.955975000  | 6 | -2.958603000 | -7.717413000 | 1.300382000  |
| 1 | 3.622874000  | 8.506627000 | 0.549120000  | 1 | -2.945342000 | -8.764230000 | 0.984273000  |
| 6 | 4.369955000  | 6.493029000 | 0.430332000  | 6 | -3.848871000 | -6.834301000 | 0.697568000  |
| 1 | 5.067151000  | 6.730825000 | -0.375305000 | 1 | -4.524545000 | -7.198587000 | -0.078460000 |
| 6 | 6.652155000  | 4.626678000 | 0.136216000  | 6 | -6.243686000 | -5.163829000 | 0.170862000  |
| 6 | 7.292577000  | 5.575643000 | 0.947373000  | 6 | -6.842297000 | -6.134782000 | 0.991337000  |
| 1 | 6.768085000  | 5.968658000 | 1.820729000  | 1 | -6.323972000 | -6.455120000 | 1.897440000  |
| 6 | 8.590289000  | 5.998495000 | 0.670652000  | 6 | -8.089507000 | -6.671935000 | 0.683019000  |
| 1 | 9.076525000  | 6.719252000 | 1.333941000  | 1 | -8.538818000 | -7.410256000 | 1.353371000  |
| 6 | 9.290169000  | 5.499060000 | -0.431674000 | 6 | -8.787921000 | -6.267665000 | -0.459002000 |
| 6 | 8.637539000  | 4.580763000 | -1.261496000 | 6 | -8.180806000 | -5.322449000 | -1.293602000 |
| 1 | 9.164018000  | 4.172587000 | -2.128144000 | 1 | -8.704144000 | -4.987071000 | -2.193143000 |
| 6 | 7.343179000  | 4.155684000 | -0.989553000 | 6 | -6.933877000 | -4.788766000 | -0.993692000 |
| 1 | 6.856538000  | 3.422766000 | -1.635916000 | 1 | -6.480897000 | -4.047468000 | -1.655000000 |
| 6 | 6.721647000  | 0.895124000 | -0.187556000 | 6 | -6.605082000 | -1.446938000 | -0.245194000 |
| 6 | 7.980503000  | 1.492041000 | 0.280487000  | 6 | -7.835662000 | -2.140825000 | 0.184062000  |

|   |              |              |              |   |               |              |              |
|---|--------------|--------------|--------------|---|---------------|--------------|--------------|
| 6 | 8.031475000  | 2.265465000  | 1.457763000  | 6 | -7.864872000  | -2.894477000 | 1.370414000  |
| 1 | 7.111128000  | 2.407536000  | 2.028177000  | 1 | -6.954999000  | -2.960916000 | 1.970399000  |
| 6 | 9.211973000  | 2.854696000  | 1.889614000  | 6 | -9.014824000  | -3.562379000 | 1.770016000  |
| 1 | 9.201764000  | 3.467479000  | 2.795825000  | 1 | -8.995013000  | -4.160534000 | 2.685197000  |
| 6 | 10.413379000 | 2.687207000  | 1.189713000  | 6 | -10.194435000 | -3.496850000 | 1.018770000  |
| 6 | 10.380676000 | 1.895978000  | 0.036713000  | 6 | -10.180497000 | -2.724869000 | -0.146843000 |
| 1 | 11.301114000 | 1.745322000  | -0.535780000 | 1 | -11.087201000 | -2.654655000 | -0.754670000 |
| 6 | 9.197346000  | 1.312454000  | -0.407773000 | 6 | -9.028248000  | -2.057120000 | -0.554956000 |
| 1 | 9.202387000  | 0.717292000  | -1.323087000 | 1 | -9.039881000  | -1.471197000 | -1.476149000 |
| 6 | 6.792512000  | -0.433787000 | -0.838560000 | 6 | -6.771294000  | -0.116401000 | -0.885578000 |
| 6 | 5.938070000  | -0.775272000 | -1.905452000 | 6 | -5.972224000  | 0.270183000  | -1.975245000 |
| 1 | 5.197660000  | -0.047473000 | -2.240915000 | 1 | -5.206837000  | -0.416396000 | -2.339617000 |
| 6 | 6.018493000  | -2.008884000 | -2.538386000 | 6 | -6.141037000  | 1.502993000  | -2.594437000 |
| 1 | 5.327610000  | -2.235210000 | -3.354741000 | 1 | -5.490590000  | 1.775022000  | -3.429263000 |
| 6 | 6.968381000  | -2.964675000 | -2.157417000 | 6 | -7.129671000  | 2.399086000  | -2.173065000 |
| 6 | 7.832008000  | -2.629031000 | -1.109315000 | 6 | -7.943217000  | 2.010036000  | -1.102793000 |
| 1 | 8.591602000  | -3.349046000 | -0.789686000 | 1 | -8.734365000  | 2.682284000  | -0.758601000 |
| 6 | 7.740830000  | -1.401208000 | -0.457803000 | 6 | -7.763975000  | 0.784456000  | -0.466264000 |
| 1 | 8.422761000  | -1.178821000 | 0.365146000  | 1 | -8.408623000  | 0.511826000  | 0.371659000  |
| 6 | 3.528712000  | -0.295901000 | -0.093895000 | 6 | -3.533096000  | -0.003928000 | -0.180875000 |
| 6 | 2.869025000  | -1.338438000 | -0.134822000 | 6 | -2.960956000  | 1.095331000  | -0.207550000 |
| 6 | 2.053757000  | -2.428982000 | -0.122783000 | 6 | -2.253449000  | 2.246640000  | -0.185813000 |
| 6 | 1.256875000  | -3.365766000 | -0.084555000 | 6 | -1.528878000  | 3.250817000  | -0.128213000 |
| 6 | 2.359084000  | -6.535071000 | -0.226554000 | 6 | -2.874889000  | 6.324854000  | -0.279927000 |
| 6 | 3.240803000  | -7.089178000 | -1.167044000 | 6 | -3.785265000  | 6.828534000  | -1.222145000 |
| 6 | 2.915154000  | -5.782502000 | 0.820654000  | 6 | -3.392000000  | 5.529482000  | 0.756776000  |
| 6 | 4.616915000  | -6.904574000 | -1.058250000 | 6 | -5.149553000  | 6.565335000  | -1.119877000 |
| 1 | 2.835515000  | -7.679272000 | -1.991728000 | 1 | -3.412508000  | 7.446795000  | -2.041441000 |
| 6 | 4.288273000  | -5.589168000 | 0.917744000  | 6 | -4.751805000  | 5.258337000  | 0.848079000  |
| 1 | 2.253276000  | -5.351743000 | 1.573708000  | 1 | -2.708103000  | 5.128385000  | 1.506345000  |
| 6 | 5.167285000  | -6.155769000 | -0.011850000 | 6 | -5.660139000  | 5.782780000  | -0.078801000 |
| 1 | 5.281287000  | -7.352044000 | -1.802673000 | 1 | -5.835490000  | 6.979024000  | -1.864683000 |
| 1 | 4.688561000  | -4.989099000 | 1.738330000  | 1 | -5.119324000  | 4.631233000  | 1.664015000  |
| 6 | 11.678143000 | 3.346087000  | 1.675130000  | 6 | -11.421783000 | -4.246473000 | 1.466676000  |
| 1 | 11.983735000 | 2.960494000  | 2.661150000  | 1 | -11.792952000 | -3.870193000 | 2.433124000  |
| 1 | 12.510523000 | 3.177470000  | 0.976488000  | 1 | -12.236469000 | -4.156457000 | 0.734038000  |

|   |               |               |              |   |               |              |              |
|---|---------------|---------------|--------------|---|---------------|--------------|--------------|
| 1 | 11.538476000  | 4.434444000   | 1.781292000  | 1 | -11.196830000 | -5.317149000 | 1.598123000  |
| 6 | 10.710617000  | 5.904073000   | -0.724804000 | 6 | -10.154670000 | -6.805520000 | -0.792116000 |
| 1 | 10.797520000  | 6.376090000   | -1.715793000 | 1 | -10.153779000 | -7.338053000 | -1.756138000 |
| 1 | 11.089974000  | 6.612659000   | 0.024940000  | 1 | -10.511176000 | -7.502403000 | -0.020306000 |
| 1 | 11.367392000  | 5.019273000   | -0.723699000 | 1 | -10.883513000 | -5.982940000 | -0.873681000 |
| 6 | 7.029574000   | -4.305317000  | -2.841969000 | 6 | -7.286690000  | 3.739048000  | -2.842813000 |
| 1 | 7.953191000   | -4.843512000  | -2.584173000 | 1 | -8.254955000  | 4.198176000  | -2.597482000 |
| 1 | 6.176029000   | -4.937361000  | -2.545792000 | 1 | -6.491988000  | 4.430945000  | -2.519023000 |
| 1 | 6.990236000   | -4.196002000  | -3.936432000 | 1 | -7.215197000  | 3.646123000  | -3.936595000 |
| 6 | 6.653250000   | -5.956448000  | 0.125345000  | 6 | -7.134329000  | 5.508680000  | 0.060565000  |
| 1 | 7.206062000   | -6.541320000  | -0.622909000 | 1 | -7.712837000  | 6.025487000  | -0.717967000 |
| 1 | 6.915391000   | -4.895705000  | -0.006848000 | 1 | -7.338505000  | 4.430164000  | -0.018824000 |
| 1 | 7.000457000   | -6.259802000  | 1.124776000  | 1 | -7.506251000  | 5.842353000  | 1.041675000  |
| 6 | -1.020084000  | -12.136472000 | -1.544664000 | 6 | 0.115322000   | 12.147073000 | -1.578489000 |
| 1 | -1.092865000  | -12.319664000 | -2.628086000 | 1 | 0.220235000   | 12.326075000 | -2.660106000 |
| 1 | -0.378545000  | -12.916738000 | -1.111372000 | 1 | -0.600637000  | 12.880703000 | -1.181399000 |
| 1 | -2.032310000  | -12.253204000 | -1.125110000 | 1 | 1.097230000   | 12.344233000 | -1.118319000 |
| 6 | -2.445168000  | -11.912880000 | 1.848873000  | 6 | 1.414234000   | 12.064647000 | 1.869052000  |
| 1 | -2.420599000  | -12.115284000 | 2.930972000  | 1 | 1.328879000   | 12.266071000 | 2.948406000  |
| 1 | -3.313920000  | -12.436295000 | 1.425491000  | 1 | 2.255135000   | 12.655704000 | 1.479338000  |
| 1 | -1.533841000  | -12.352874000 | 1.413201000  | 1 | 0.489617000   | 12.430893000 | 1.394337000  |
| 6 | -7.325178000  | -3.137842000  | 1.880684000  | 6 | 7.017784000   | 3.745756000  | 2.058434000  |
| 1 | -7.075834000  | -2.069436000  | 1.803369000  | 1 | 6.862676000   | 2.658785000  | 1.993195000  |
| 1 | -8.169674000  | -3.315631000  | 1.196216000  | 1 | 7.859419000   | 3.987872000  | 1.389662000  |
| 1 | -7.665262000  | -3.346206000  | 2.904688000  | 1 | 7.317983000   | 3.995236000  | 3.085860000  |
| 6 | -8.543009000  | -2.695636000  | -1.565256000 | 6 | 8.259048000   | 3.421884000  | -1.381167000 |
| 1 | -7.896492000  | -3.524974000  | -1.231272000 | 1 | 7.539402000   | 4.178450000  | -1.025989000 |
| 1 | -9.538826000  | -2.851040000  | -1.125831000 | 1 | 9.233964000   | 3.646062000  | -0.925470000 |
| 1 | -8.635438000  | -2.777820000  | -2.658742000 | 1 | 8.351798000   | 3.547725000  | -2.470089000 |
| 6 | -9.018438000  | 8.145836000   | -1.796883000 | 6 | 9.588382000   | -7.412122000 | -2.064290000 |
| 1 | -9.069899000  | 9.125200000   | -1.300561000 | 1 | 9.753324000   | -8.375022000 | -1.560349000 |
| 1 | -9.144900000  | 8.304243000   | -2.879128000 | 1 | 9.657898000   | -7.580923000 | -3.150345000 |
| 1 | -9.873422000  | 7.542091000   | -1.451921000 | 1 | 10.411834000  | -6.734819000 | -1.785669000 |
| 6 | -10.111552000 | 6.728182000   | 1.407379000  | 6 | 10.710462000  | -5.896194000 | 1.085458000  |
| 1 | -11.078798000 | 6.619764000   | 0.895691000  | 1 | 11.639143000  | -5.691422000 | 0.533997000  |
| 1 | -10.304944000 | 6.768616000   | 2.491103000  | 1 | 10.955409000  | -5.942975000 | 2.158125000  |

|   |              |             |              |   |              |              |              |
|---|--------------|-------------|--------------|---|--------------|--------------|--------------|
| 1 | -9.680849000 | 7.700986000 | 1.117486000  | 1 | 10.350274000 | -6.894883000 | 0.789014000  |
| 6 | 0.913815000  | 8.173446000 | -1.123327000 | 6 | -0.275799000 | -8.272638000 | -0.772029000 |
| 1 | 1.169003000  | 8.810235000 | -0.261820000 | 1 | -0.448833000 | -8.872473000 | 0.135192000  |
| 1 | 1.725781000  | 7.438165000 | -1.226086000 | 1 | -1.146438000 | -7.609024000 | -0.883047000 |
| 1 | 0.898028000  | 8.803874000 | -2.023421000 | 1 | -0.245025000 | -8.954037000 | -1.633868000 |
| 6 | 1.771979000  | 8.308215000 | 2.556827000  | 6 | -1.097460000 | -8.243884000 | 2.937682000  |
| 1 | 2.170767000  | 9.307601000 | 2.331776000  | 1 | -1.416024000 | -9.287737000 | 2.805259000  |
| 1 | 0.757419000  | 8.249301000 | 2.128486000  | 1 | -0.092791000 | -8.143926000 | 2.493696000  |
| 1 | 1.670589000  | 8.214402000 | 3.647663000  | 1 | -0.997016000 | -8.048370000 | 4.015200000  |

**3c**  
**m06-2x/def2-SVP**

**0 1**

|   |             |               |              |
|---|-------------|---------------|--------------|
| 6 | 2.287774000 | -3.559823000  | -0.026597000 |
| 6 | 1.030672000 | -4.144441000  | 0.034729000  |
| 6 | 1.609554000 | -5.506616000  | 0.186568000  |
| 6 | 2.974745000 | -4.874368000  | 0.037374000  |
| 6 | 4.281893000 | -5.204689000  | -0.106277000 |
| 6 | 4.758710000 | -6.585348000  | -0.335321000 |
| 6 | 5.965030000 | -7.024065000  | 0.235372000  |
| 1 | 6.561291000 | -6.328514000  | 0.828625000  |
| 6 | 6.396482000 | -8.337062000  | 0.079796000  |
| 1 | 7.319304000 | -8.699109000  | 0.533156000  |
| 6 | 5.616957000 | -9.212443000  | -0.667636000 |
| 6 | 4.438907000 | -8.802380000  | -1.281118000 |
| 1 | 3.868200000 | -9.518881000  | -1.872037000 |
| 6 | 4.018560000 | -7.487944000  | -1.114463000 |
| 1 | 3.094034000 | -7.150279000  | -1.586111000 |
| 6 | 1.037664000 | -6.685277000  | 0.530107000  |
| 6 | 1.798213000 | -7.877109000  | 0.966658000  |
| 6 | 2.921816000 | -7.762178000  | 1.797914000  |
| 1 | 3.225189000 | -6.774689000  | 2.150019000  |
| 6 | 3.656244000 | -8.883940000  | 2.166640000  |
| 1 | 4.539039000 | -8.810878000  | 2.801939000  |
| 6 | 3.256364000 | -10.130228000 | 1.699490000  |
| 6 | 2.126128000 | -10.287006000 | 0.905006000  |

**3c**  
**m06-2x/def2-SVP**

**0 3**

|   |               |              |              |
|---|---------------|--------------|--------------|
| 6 | -4.016417000  | -1.350823000 | -0.004376000 |
| 6 | -4.272138000  | 0.009259000  | 0.025884000  |
| 6 | -5.732420000  | -0.209946000 | 0.194301000  |
| 6 | -5.456860000  | -1.692456000 | 0.079022000  |
| 6 | -6.102860000  | -2.878855000 | -0.044017000 |
| 6 | -7.560644000  | -3.000093000 | -0.260861000 |
| 6 | -8.282224000  | -4.045767000 | 0.338489000  |
| 1 | -7.752801000  | -4.782552000 | 0.945313000  |
| 6 | -9.662226000  | -4.140324000 | 0.193717000  |
| 1 | -10.239833000 | -4.932994000 | 0.669403000  |
| 6 | -10.320588000 | -3.184970000 | -0.572125000 |
| 6 | -9.634015000  | -2.160917000 | -1.213896000 |
| 1 | -10.189558000 | -1.443654000 | -1.818208000 |
| 6 | -8.255182000  | -2.077105000 | -1.057513000 |
| 1 | -7.700725000  | -1.276628000 | -1.550568000 |
| 6 | -6.733122000  | 0.646539000  | 0.511252000  |
| 6 | -8.074072000  | 0.218917000  | 0.967652000  |
| 6 | -8.237294000  | -0.875760000 | 1.829215000  |
| 1 | -7.354062000  | -1.405431000 | 2.190500000  |
| 6 | -9.504250000  | -1.299025000 | 2.215787000  |
| 1 | -9.648986000  | -2.155599000 | 2.874291000  |
| 6 | -10.614893000 | -0.614019000 | 1.737695000  |
| 6 | -10.490559000 | 0.498240000  | 0.912820000  |

|   |               |               |              |   |               |              |              |
|---|---------------|---------------|--------------|---|---------------|--------------|--------------|
| 1 | 1.841705000   | -11.285649000 | 0.573336000  | 1 | -11.389174000 | 1.012943000  | 0.572544000  |
| 6 | 1.396364000   | -9.157101000  | 0.551641000  | 6 | -9.216911000  | 0.914165000  | 0.540113000  |
| 1 | 0.508364000   | -9.261752000  | -0.074681000 | 1 | -9.101865000  | 1.782575000  | -0.111316000 |
| 6 | -0.444423000  | -6.805226000  | 0.518770000  | 6 | -6.486695000  | 2.111455000  | 0.439089000  |
| 6 | -1.112938000  | -7.327903000  | 1.637274000  | 6 | -6.835114000  | 2.936462000  | 1.520368000  |
| 1 | -0.533254000  | -7.647600000  | 2.505281000  | 1 | -7.285274000  | 2.490635000  | 2.409341000  |
| 6 | -2.498617000  | -7.428157000  | 1.657597000  | 6 | -6.602930000  | 4.305795000  | 1.477293000  |
| 1 | -3.036314000  | -7.814905000  | 2.523229000  | 1 | -6.852751000  | 4.959698000  | 2.312768000  |
| 6 | -3.215522000  | -7.024203000  | 0.536027000  | 6 | -6.038707000  | 4.852902000  | 0.329727000  |
| 6 | -2.586713000  | -6.529349000  | -0.598766000 | 6 | -5.703153000  | 4.072502000  | -0.768374000 |
| 1 | -3.186558000  | -6.256499000  | -1.465237000 | 1 | -5.291522000  | 4.549901000  | -1.656223000 |
| 6 | -1.198174000  | -6.419056000  | -0.596310000 | 6 | -5.928408000  | 2.699319000  | -0.702977000 |
| 1 | -0.686091000  | -6.035941000  | -1.481029000 | 1 | -5.678015000  | 2.070419000  | -1.559417000 |
| 6 | -0.230336000  | -3.539233000  | 0.009168000  | 6 | -3.371771000  | 1.084483000  | -0.015479000 |
| 6 | -1.259438000  | -2.874007000  | -0.035118000 | 6 | -2.472162000  | 1.916502000  | -0.061872000 |
| 6 | -2.351843000  | -2.057826000  | -0.077858000 | 6 | -1.414483000  | 2.774884000  | -0.103963000 |
| 6 | -3.280145000  | -1.257469000  | -0.106842000 | 6 | -0.410500000  | 3.487334000  | -0.127404000 |
| 6 | -4.241344000  | -0.240500000  | -0.107026000 | 6 | 0.799414000   | 4.160064000  | -0.129258000 |
| 6 | -4.094383000  | 1.131478000   | 0.048798000  | 6 | 2.162398000   | 3.638885000  | 0.036834000  |
| 6 | -5.561602000  | 1.359031000   | -0.047858000 | 6 | 2.691537000   | 5.030582000  | -0.044442000 |
| 6 | -5.721964000  | -0.140313000  | -0.153017000 | 6 | 1.267246000   | 5.522336000  | -0.150411000 |
| 6 | -6.677669000  | -1.101573000  | -0.195866000 | 6 | 0.553486000   | 6.708869000  | -0.197686000 |
| 6 | -6.294021000  | -2.481874000  | -0.596544000 | 6 | -0.845619000  | 6.669831000  | -0.678731000 |
| 6 | -5.530461000  | -2.688116000  | -1.753492000 | 6 | -1.175372000  | 5.956866000  | -1.842761000 |
| 1 | -5.190306000  | -1.825829000  | -2.329938000 | 1 | -0.394914000  | 5.407761000  | -2.372337000 |
| 6 | -5.225824000  | -3.973450000  | -2.192382000 | 6 | -2.472259000  | 5.960449000  | -2.343436000 |
| 1 | -4.650601000  | -4.148232000  | -3.101861000 | 1 | -2.736123000  | 5.427537000  | -3.257107000 |
| 6 | -5.698491000  | -5.055036000  | -1.462602000 | 6 | -3.445729000  | 6.686064000  | -1.668781000 |
| 6 | -6.443678000  | -4.891685000  | -0.299593000 | 6 | -3.165192000  | 7.391198000  | -0.503271000 |
| 1 | -6.771639000  | -5.773410000  | 0.249465000  | 1 | -3.969014000  | 7.924525000  | 0.002246000  |
| 6 | -6.746719000  | -3.601236000  | 0.120045000  | 6 | -1.861617000  | 7.385762000  | -0.020989000 |
| 1 | -7.347292000  | -3.452585000  | 1.019446000  | 1 | -1.620288000  | 7.940825000  | 0.887337000  |
| 6 | -8.104659000  | -0.857774000  | 0.101279000  | 6 | 1.113795000   | 8.006398000  | 0.193194000  |
| 6 | -9.108086000  | -1.547422000  | -0.599727000 | 6 | 0.679614000   | 9.194507000  | -0.427248000 |
| 1 | -8.826102000  | -2.283768000  | -1.354274000 | 1 | -0.096549000  | 9.147103000  | -1.192427000 |
| 6 | -10.454228000 | -1.285664000  | -0.368247000 | 6 | 1.250460000   | 10.421014000 | -0.111060000 |

|   |               |              |              |   |             |              |              |
|---|---------------|--------------|--------------|---|-------------|--------------|--------------|
| 1 | -11.244503000 | -1.796955000 | -0.918030000 | 1 | 0.940995000 | 11.344477000 | -0.600567000 |
| 6 | -10.795588000 | -0.332876000 | 0.584691000  | 6 | 2.259167000 | 10.463461000 | 0.845620000  |
| 6 | -9.830762000  | 0.340200000  | 1.325442000  | 6 | 2.689331000 | 9.318069000  | 1.507628000  |
| 1 | -10.144832000 | 1.067497000  | 2.074236000  | 1 | 3.472194000 | 9.400614000  | 2.261621000  |
| 6 | -8.489332000  | 0.069996000  | 1.081937000  | 6 | 2.114232000 | 8.098151000  | 1.179201000  |
| 1 | -7.718405000  | 0.591588000  | 1.652021000  | 1 | 2.444653000 | 7.191022000  | 1.688024000  |
| 6 | -6.285262000  | 2.495043000  | -0.189967000 | 6 | 3.961803000 | 5.483657000  | -0.187403000 |
| 6 | -7.710404000  | 2.520743000  | -0.591869000 | 6 | 4.309178000 | 6.876628000  | -0.545830000 |
| 6 | -8.204631000  | 1.670925000  | -1.591326000 | 6 | 3.583269000 | 7.591704000  | -1.509044000 |
| 1 | -7.519699000  | 0.987197000  | -2.096032000 | 1 | 2.756913000 | 7.101326000  | -2.026896000 |
| 6 | -9.551968000  | 1.681337000  | -1.936653000 | 6 | 3.895180000 | 8.914813000  | -1.803316000 |
| 1 | -9.954953000  | 1.019041000  | -2.702958000 | 1 | 3.333869000 | 9.488408000  | -2.541014000 |
| 6 | -10.407159000 | 2.553586000  | -1.274348000 | 6 | 4.943495000 | 9.523372000  | -1.123758000 |
| 6 | -9.946126000  | 3.436248000  | -0.303915000 | 6 | 5.710180000 | 8.834193000  | -0.190338000 |
| 1 | -10.650775000 | 4.112699000  | 0.179936000  | 1 | 6.533353000 | 9.347254000  | 0.307035000  |
| 6 | -8.594874000  | 3.421186000  | 0.023826000  | 6 | 5.394276000 | 7.508471000  | 0.084172000  |
| 1 | -8.216030000  | 4.106299000  | 0.784684000  | 1 | 5.984216000 | 6.952717000  | 0.815501000  |
| 6 | -5.636028000  | 3.818693000  | 0.009172000  | 6 | 5.103558000 | 4.543626000  | -0.029530000 |
| 6 | -4.872040000  | 4.104727000  | 1.147646000  | 6 | 5.226411000 | 3.706915000  | 1.086883000  |
| 1 | -4.752246000  | 3.340325000  | 1.917729000  | 1 | 4.468377000 | 3.746409000  | 1.871196000  |
| 6 | -4.277064000  | 5.353486000  | 1.319219000  | 6 | 6.306384000 | 2.835992000  | 1.216513000  |
| 1 | -3.696550000  | 5.603182000  | 2.206521000  | 1 | 6.431148000 | 2.192141000  | 2.086135000  |
| 6 | -4.453559000  | 6.313909000  | 0.332094000  | 6 | 7.261531000 | 2.807593000  | 0.208616000  |
| 6 | -5.210937000  | 6.068250000  | -0.808183000 | 6 | 7.176756000 | 3.629234000  | -0.910045000 |
| 1 | -5.322888000  | 6.855043000  | -1.554108000 | 1 | 7.952895000 | 3.573563000  | -1.673232000 |
| 6 | -5.808323000  | 4.823301000  | -0.957072000 | 6 | 6.101824000 | 4.502740000  | -1.016314000 |
| 1 | -6.414761000  | 4.616036000  | -1.840688000 | 1 | 6.023703000 | 5.161938000  | -1.882855000 |
| 6 | -2.933707000  | 1.900662000  | 0.174105000  | 6 | 2.607496000 | 2.386547000  | 0.153906000  |
| 6 | -1.849790000  | 2.466257000  | 0.264303000  | 6 | 2.888725000 | 1.153972000  | 0.253894000  |
| 6 | -0.605086000  | 3.020678000  | 0.315164000  | 6 | 3.109751000 | -0.132463000 | 0.316838000  |
| 6 | 0.545868000   | 3.442764000  | 0.304629000  | 6 | 3.247854000 | -1.390415000 | 0.315477000  |
| 6 | 1.899571000   | 3.772678000  | 0.184007000  | 6 | 3.227962000 | -2.728326000 | 0.220715000  |
| 6 | 2.981009000   | 2.963049000  | -0.133518000 | 6 | 2.136101000 | -3.632992000 | -0.082087000 |
| 6 | 3.911410000   | 4.119730000  | -0.188552000 | 6 | 3.027222000 | -4.774554000 | -0.159301000 |
| 6 | 2.731019000   | 5.001518000  | 0.155416000  | 6 | 4.189484000 | -3.864731000 | 0.162194000  |
| 6 | 2.392397000   | 6.302120000  | 0.337480000  | 6 | 5.539749000 | -3.866073000 | 0.295926000  |

|   |              |              |              |   |              |               |              |
|---|--------------|--------------|--------------|---|--------------|---------------|--------------|
| 6 | 1.083592000  | 6.613899000  | 0.971382000  | 6 | 6.192066000  | -2.670127000  | 0.895018000  |
| 6 | 0.690222000  | 5.942714000  | 2.137732000  | 6 | 5.707280000  | -2.134673000  | 2.096507000  |
| 1 | 1.350654000  | 5.187803000  | 2.568153000  | 1 | 4.842340000  | -2.596201000  | 2.575777000  |
| 6 | -0.517174000 | 6.237481000  | 2.763491000  | 6 | 6.318666000  | -1.035228000  | 2.690053000  |
| 1 | -0.829227000 | 5.731558000  | 3.677308000  | 1 | 5.960068000  | -0.616116000  | 3.630336000  |
| 6 | -1.328658000 | 7.220213000  | 2.214335000  | 6 | 7.428493000  | -0.475989000  | 2.071187000  |
| 6 | -0.973261000 | 7.909992000  | 1.059671000  | 6 | 7.939055000  | -0.977433000  | 0.878890000  |
| 1 | -1.652405000 | 8.661463000  | 0.659504000  | 1 | 8.802336000  | -0.492879000  | 0.424969000  |
| 6 | 0.239455000  | 7.607531000  | 0.450209000  | 6 | 7.320532000  | -2.082707000  | 0.302851000  |
| 1 | 0.539298000  | 8.144160000  | -0.451934000 | 1 | 7.712482000  | -2.497042000  | -0.628044000 |
| 6 | 3.251977000  | 7.439865000  | -0.049412000 | 6 | 6.412423000  | -4.987969000  | -0.103491000 |
| 6 | 3.305478000  | 8.598597000  | 0.742438000  | 6 | 7.549717000  | -5.313100000  | 0.654368000  |
| 1 | 2.695959000  | 8.658754000  | 1.645963000  | 1 | 7.795275000  | -4.716110000  | 1.534535000  |
| 6 | 4.140871000  | 9.658449000  | 0.405706000  | 6 | 8.350039000  | -6.398823000  | 0.315472000  |
| 1 | 4.209657000  | 10.556996000 | 1.019004000  | 1 | 9.223754000  | -6.678412000  | 0.904271000  |
| 6 | 4.915768000  | 9.559509000  | -0.744430000 | 6 | 8.015657000  | -7.152199000  | -0.804409000 |
| 6 | 4.859609000  | 8.444143000  | -1.572259000 | 6 | 6.923125000  | -6.833343000  | -1.602783000 |
| 1 | 5.473921000  | 8.416545000  | -2.472338000 | 1 | 6.709315000  | -7.441427000  | -2.481870000 |
| 6 | 4.024718000  | 7.390142000  | -1.220092000 | 6 | 6.127622000  | -5.750524000  | -1.247223000 |
| 1 | 3.968905000  | 6.504819000  | -1.856168000 | 1 | 5.263150000  | -5.487363000  | -1.859567000 |
| 6 | 5.251429000  | 4.178242000  | -0.384522000 | 6 | 2.753205000  | -6.110458000  | -0.359711000 |
| 6 | 6.070599000  | 5.379417000  | -0.111454000 | 6 | 3.705028000  | -7.188472000  | -0.049636000 |
| 6 | 5.832658000  | 6.177621000  | 1.017247000  | 6 | 4.564616000  | -7.103240000  | 1.059127000  |
| 1 | 5.038172000  | 5.894976000  | 1.710401000  | 1 | 4.505813000  | -6.230325000  | 1.711634000  |
| 6 | 6.586719000  | 7.321227000  | 1.256572000  | 6 | 5.485359000  | -8.107273000  | 1.331622000  |
| 1 | 6.408280000  | 7.957918000  | 2.123201000  | 1 | 6.163899000  | -8.050757000  | 2.182856000  |
| 6 | 7.588169000  | 7.663877000  | 0.355915000  | 6 | 5.548906000  | -9.206939000  | 0.483131000  |
| 6 | 7.874095000  | 6.879439000  | -0.756026000 | 6 | 4.694826000  | -9.342769000  | -0.606348000 |
| 1 | 8.676793000  | 7.181003000  | -1.429065000 | 1 | 4.774433000  | -10.226876000 | -1.238976000 |
| 6 | 7.117622000  | 5.733725000  | -0.977488000 | 6 | 3.770670000  | -8.336358000  | -0.860541000 |
| 1 | 7.327457000  | 5.107714000  | -1.846854000 | 1 | 3.099842000  | -8.424382000  | -1.716952000 |
| 6 | 5.966606000  | 2.970543000  | -0.877051000 | 6 | 1.417946000  | -6.496796000  | -0.870138000 |
| 6 | 5.470713000  | 2.224841000  | -1.955047000 | 6 | 0.815966000  | -5.802181000  | -1.931077000 |
| 1 | 4.554136000  | 2.546847000  | -2.452513000 | 1 | 1.353124000  | -4.978940000  | -2.404935000 |
| 6 | 6.132946000  | 1.085528000  | -2.405199000 | 6 | -0.449986000 | -6.149723000  | -2.391621000 |
| 1 | 5.757512000  | 0.494139000  | -3.240172000 | 1 | -0.929703000 | -5.616737000  | -3.212380000 |

|           |               |               |              |           |               |               |              |
|-----------|---------------|---------------|--------------|-----------|---------------|---------------|--------------|
| 6         | 7.308438000   | 0.704233000   | -1.773744000 | 6         | -1.113027000  | -7.209392000  | -1.786665000 |
| 6         | 7.842774000   | 1.429875000   | -0.713456000 | 6         | -0.542678000  | -7.936022000  | -0.745860000 |
| 1         | 8.764871000   | 1.087232000   | -0.246302000 | 1         | -1.105300000  | -8.753752000  | -0.298095000 |
| 6         | 7.169554000   | 2.564107000   | -0.276214000 | 6         | 0.722785000   | -7.578262000  | -0.298800000 |
| 1         | 7.574656000   | 3.145311000   | 0.554330000  | 1         | 1.181036000   | -8.133219000  | 0.521799000  |
| 6         | 3.052660000   | 1.570812000   | -0.227403000 | 6         | 0.776024000   | -3.370217000  | -0.146391000 |
| 6         | 2.990814000   | 0.347027000   | -0.242836000 | 6         | -0.395948000  | -3.000228000  | -0.162424000 |
| 6         | 2.845383000   | -1.007468000  | -0.214733000 | 6         | -1.672789000  | -2.522383000  | -0.149642000 |
| 6         | 2.647851000   | -2.214825000  | -0.146385000 | 6         | -2.795054000  | -2.034521000  | -0.103257000 |
| 9         | 6.010877000   | -10.475978000 | -0.805919000 | 9         | -11.643569000 | -3.254480000  | -0.699912000 |
| 9         | 3.971998000   | -11.203083000 | 2.028374000  | 9         | -11.830123000 | -1.031259000  | 2.085362000  |
| 9         | -4.545433000  | -7.130243000  | 0.555237000  | 9         | -5.829449000  | 6.170536000   | 0.285122000  |
| 9         | -5.434075000  | -6.288231000  | -1.900044000 | 9         | -4.685019000  | 6.708468000   | -2.162179000 |
| 9         | -12.080292000 | -0.059891000  | 0.798233000  | 9         | 2.826084000   | 11.629702000  | 1.139054000  |
| 9         | -11.701916000 | 2.546726000   | -1.582466000 | 9         | 5.225163000   | 10.798585000  | -1.380023000 |
| 9         | -3.895446000  | 7.516987000   | 0.479242000  | 9         | 8.302532000   | 1.979567000   | 0.314188000  |
| 9         | -2.480200000  | 7.513208000   | 2.822607000  | 9         | 8.022390000   | 0.571006000   | 2.648498000  |
| 9         | 5.730297000   | 10.561396000  | -1.065880000 | 9         | 8.765119000   | -8.203516000  | -1.126195000 |
| 9         | 8.295402000   | 8.771201000   | 0.567512000  | 9         | 6.448480000   | -10.156701000 | 0.723684000  |
| 9         | 7.952019000   | -0.380340000  | -2.208800000 | 9         | -2.324997000  | -7.548054000  | -2.226646000 |
| 6         | 5.313957000   | -4.135916000  | -0.019928000 | 6         | -5.323350000  | -4.143555000  | 0.036284000  |
| 6         | 6.345312000   | -4.051619000  | -0.969415000 | 6         | -5.517567000  | -5.164320000  | -0.909223000 |
| 6         | 5.305183000   | -3.224214000  | 1.044250000  | 6         | -4.411914000  | -4.359280000  | 1.078513000  |
| 6         | 7.334820000   | -3.080372000  | -0.868486000 | 6         | -4.815048000  | -6.360689000  | -0.827502000 |
| 1         | 6.367316000   | -4.761376000  | -1.798617000 | 1         | -6.230843000  | -5.010942000  | -1.721280000 |
| 6         | 6.291031000   | -2.247831000  | 1.162410000  | 6         | -3.702756000  | -5.554120000  | 1.177233000  |
| 1         | 4.520465000   | -3.292201000  | 1.799954000  | 1         | -4.267484000  | -3.582892000  | 1.832005000  |
| 6         | 7.296557000   | -2.199496000  | 0.207538000  | 6         | -3.924033000  | -6.539268000  | 0.225779000  |
| 1         | 8.135821000   | -2.989247000  | -1.601191000 | 1         | -4.940939000  | -7.158694000  | -1.558429000 |
| 1         | 6.302171000   | -1.537254000  | 1.988746000  | 1         | -2.995556000  | -5.738892000  | 1.985723000  |
| 9         | 8.267297000   | -1.293554000  | 0.338364000  | 9         | -3.277497000  | -7.701648000  | 0.336483000  |
| <b>3c</b> |               |               |              | <b>3c</b> |               |               |              |

**m06-2x/def2-SVP****-2 1**

|   |              |               |              |
|---|--------------|---------------|--------------|
| 6 | 0.746671000  | -4.165485000  | 0.006043000  |
| 6 | -0.650193000 | -4.222499000  | 0.038253000  |
| 6 | -0.627644000 | -5.700249000  | 0.178100000  |
| 6 | 0.876162000  | -5.632306000  | 0.041148000  |
| 6 | 1.961032000  | -6.448252000  | -0.097672000 |
| 6 | 1.867165000  | -7.895087000  | -0.381261000 |
| 6 | 2.809477000  | -8.795844000  | 0.147130000  |
| 1 | 3.628789000  | -8.408864000  | 0.755640000  |
| 6 | 2.702785000  | -10.166828000 | -0.067254000 |
| 1 | 3.418068000  | -10.872929000 | 0.355802000  |
| 6 | 1.642705000  | -10.645901000 | -0.826209000 |
| 6 | 0.710784000  | -9.787723000  | -1.394535000 |
| 1 | -0.101864000 | -10.201663000 | -1.992245000 |
| 6 | 0.835531000  | -8.418846000  | -1.179252000 |
| 1 | 0.109835000  | -7.732623000  | -1.619214000 |
| 6 | -1.608263000 | -6.589167000  | 0.487176000  |
| 6 | -1.355720000 | -7.986898000  | 0.905779000  |
| 6 | -0.271863000 | -8.323301000  | 1.731475000  |
| 1 | 0.388242000  | -7.529611000  | 2.085343000  |
| 6 | -0.014235000 | -9.646195000  | 2.079393000  |
| 1 | 0.839627000  | -9.919478000  | 2.699858000  |
| 6 | -0.861094000 | -10.641234000 | 1.610870000  |
| 6 | -1.968804000 | -10.345499000 | 0.826291000  |
| 1 | -2.614044000 | -11.156211000 | 0.486635000  |
| 6 | -2.211815000 | -9.018641000  | 0.484714000  |
| 1 | -3.073021000 | -8.770337000  | -0.138606000 |
| 6 | -3.030139000 | -6.150408000  | 0.471091000  |
| 6 | -3.872431000 | -6.449455000  | 1.554663000  |
| 1 | -3.468091000 | -7.002895000  | 2.404581000  |
| 6 | -5.200693000 | -6.039366000  | 1.568781000  |
| 1 | -5.860050000 | -6.248406000  | 2.411539000  |
| 6 | -5.696381000 | -5.333504000  | 0.477998000  |
| 6 | -4.901690000 | -5.033578000  | -0.619417000 |
| 1 | -5.335221000 | -4.491027000  | -1.457891000 |

**m06-2x/def2-SVP****-2 3**

|   |              |              |              |
|---|--------------|--------------|--------------|
| 6 | -2.255631000 | 3.567653000  | -0.006465000 |
| 6 | -0.955446000 | 4.159861000  | 0.049302000  |
| 6 | -1.533438000 | 5.506842000  | 0.186960000  |
| 6 | -2.907971000 | 4.882386000  | 0.030624000  |
| 6 | -4.218833000 | 5.243948000  | -0.110652000 |
| 6 | -4.671644000 | 6.620794000  | -0.389912000 |
| 6 | -5.889214000 | 7.100842000  | 0.127129000  |
| 1 | -6.510383000 | 6.432668000  | 0.726290000  |
| 6 | -6.303019000 | 8.412652000  | -0.085152000 |
| 1 | -7.235708000 | 8.796119000  | 0.330017000  |
| 6 | -5.491974000 | 9.259160000  | -0.829693000 |
| 6 | -4.299277000 | 8.816356000  | -1.385968000 |
| 1 | -3.693400000 | 9.508645000  | -1.971376000 |
| 6 | -3.903364000 | 7.499775000  | -1.173537000 |
| 1 | -2.966524000 | 7.139487000  | -1.602029000 |
| 6 | -0.971947000 | 6.710997000  | 0.500966000  |
| 6 | -1.737270000 | 7.903151000  | 0.922760000  |
| 6 | -2.876391000 | 7.800281000  | 1.738073000  |
| 1 | -3.192076000 | 6.812775000  | 2.078772000  |
| 6 | -3.616761000 | 8.924317000  | 2.092392000  |
| 1 | -4.516296000 | 8.847595000  | 2.703885000  |
| 6 | -3.203880000 | 10.171228000 | 1.643406000  |
| 6 | -2.059550000 | 10.322585000 | 0.870585000  |
| 1 | -1.763911000 | 11.320333000 | 0.544464000  |
| 6 | -1.332502000 | 9.188771000  | 0.520617000  |
| 1 | -0.437213000 | 9.291622000  | -0.095695000 |
| 6 | 0.509081000  | 6.843380000  | 0.498159000  |
| 6 | 1.170378000  | 7.453588000  | 1.577610000  |
| 1 | 0.580611000  | 7.828458000  | 2.416549000  |
| 6 | 2.555819000  | 7.572041000  | 1.603325000  |
| 1 | 3.080036000  | 8.026742000  | 2.444409000  |
| 6 | 3.290578000  | 7.083952000  | 0.528974000  |
| 6 | 2.675494000  | 6.490998000  | -0.564541000 |
| 1 | 3.286121000  | 6.134751000  | -1.392269000 |

|   |               |              |              |   |              |              |              |
|---|---------------|--------------|--------------|---|--------------|--------------|--------------|
| 6 | -3.570758000  | -5.446000000 | -0.613352000 | 6 | 1.287279000  | 6.374946000  | -0.570184000 |
| 1 | -2.933041000  | -5.215309000 | -1.468180000 | 1 | 0.790690000  | 5.905343000  | -1.420676000 |
| 6 | -1.590003000  | -3.199681000 | 0.010964000  | 6 | 0.289343000  | 3.563898000  | 0.030478000  |
| 6 | -2.281993000  | -2.176510000 | -0.037858000 | 6 | 1.321667000  | 2.879447000  | -0.021470000 |
| 6 | -2.969449000  | -1.014694000 | -0.082120000 | 6 | 2.392296000  | 2.056407000  | -0.065279000 |
| 6 | -3.513851000  | 0.100304000  | -0.091217000 | 6 | 3.316493000  | 1.231757000  | -0.090853000 |
| 6 | -3.998121000  | 1.386121000  | -0.089633000 | 6 | 4.241635000  | 0.204992000  | -0.098300000 |
| 6 | -3.284877000  | 2.661072000  | 0.044865000  | 6 | 4.075071000  | -1.209880000 | 0.023918000  |
| 6 | -4.592066000  | 3.375170000  | -0.035737000 | 6 | 5.530280000  | -1.426112000 | -0.072607000 |
| 6 | -5.294093000  | 2.030831000  | -0.085320000 | 6 | 5.701853000  | 0.079379000  | -0.127821000 |
| 6 | -6.577711000  | 1.524286000  | -0.114448000 | 6 | 6.689395000  | 1.027332000  | -0.151228000 |
| 6 | -6.769417000  | 0.117428000  | -0.549687000 | 6 | 6.335663000  | 2.414985000  | -0.553217000 |
| 6 | -6.112663000  | -0.372371000 | -1.691922000 | 6 | 5.557471000  | 2.642940000  | -1.698996000 |
| 1 | -5.420043000  | 0.283469000  | -2.222187000 | 1 | 5.173962000  | 1.786537000  | -2.255910000 |
| 6 | -6.328458000  | -1.664681000 | -2.158960000 | 6 | 5.276341000  | 3.932867000  | -2.139320000 |
| 1 | -5.825370000  | -2.040702000 | -3.050662000 | 1 | 4.679293000  | 4.114145000  | -3.033631000 |
| 6 | -7.217942000  | -2.483657000 | -1.477403000 | 6 | 5.784973000  | 5.008458000  | -1.425771000 |
| 6 | -7.871803000  | -2.053844000 | -0.330847000 | 6 | 6.537188000  | 4.830828000  | -0.271553000 |
| 1 | -8.534528000  | -2.742665000 | 0.192605000  | 1 | 6.883837000  | 5.706858000  | 0.275828000  |
| 6 | -7.643800000  | -0.756279000 | 0.121284000  | 6 | 6.811659000  | 3.533355000  | 0.151768000  |
| 1 | -8.155368000  | -0.403151000 | 1.018958000  | 1 | 7.410269000  | 3.375800000  | 1.051251000  |
| 6 | -7.773336000  | 2.285890000  | 0.270212000  | 6 | 8.099652000  | 0.763487000  | 0.188550000  |
| 6 | -9.030051000  | 2.027668000  | -0.316593000 | 6 | 9.144196000  | 1.469702000  | -0.437473000 |
| 1 | -9.113941000  | 1.232553000  | -1.059421000 | 1 | 8.899108000  | 2.235274000  | -1.175647000 |
| 6 | -10.157049000 | 2.778401000  | 0.003672000  | 6 | 10.479509000 | 1.194037000  | -0.158002000 |
| 1 | -11.124005000 | 2.589146000  | -0.464434000 | 1 | 11.292340000 | 1.724878000  | -0.654903000 |
| 6 | -10.039570000 | 3.810735000  | 0.925258000  | 6 | 10.780751000 | 0.199915000  | 0.763635000  |
| 6 | -8.829410000  | 4.083321000  | 1.549574000  | 6 | 9.781076000  | -0.499577000 | 1.426890000  |
| 1 | -8.774764000  | 4.894824000  | 2.276319000  | 1 | 10.056578000 | -1.268039000 | 2.149860000  |
| 6 | -7.714634000  | 3.314675000  | 1.231976000  | 6 | 8.450951000  | -0.205769000 | 1.145829000  |
| 1 | -6.761190000  | 3.518956000  | 1.722389000  | 1 | 7.655676000  | -0.748687000 | 1.659614000  |
| 6 | -4.868991000  | 4.691877000  | -0.224709000 | 6 | 6.274913000  | -2.559495000 | -0.220071000 |
| 6 | -6.201577000  | 5.228255000  | -0.589490000 | 6 | 7.700567000  | -2.573163000 | -0.615746000 |
| 6 | -7.031732000  | 4.580277000  | -1.515643000 | 6 | 8.211236000  | -1.685063000 | -1.575746000 |
| 1 | -6.682604000  | 3.656862000  | -1.980730000 | 1 | 7.532158000  | -0.972655000 | -2.047334000 |
| 6 | -8.295517000  | 5.077828000  | -1.820608000 | 6 | 9.562328000  | -1.681589000 | -1.911285000 |

|   |              |             |              |   |              |              |              |
|---|--------------|-------------|--------------|---|--------------|--------------|--------------|
| 1 | -8.958428000 | 4.567165000 | -2.519397000 | 1 | 9.970135000  | -0.977588000 | -2.637224000 |
| 6 | -8.728298000 | 6.240695000 | -1.198740000 | 6 | 10.411380000 | -2.589231000 | -1.293463000 |
| 6 | -7.921975000 | 6.932415000 | -0.303862000 | 6 | 9.939832000  | -3.512629000 | -0.368901000 |
| 1 | -8.297389000 | 7.846638000 | 0.156801000  | 1 | 10.638152000 | -4.214359000 | 0.088444000  |
| 6 | -6.660002000 | 6.424085000 | -0.011862000 | 6 | 8.587559000  | -3.501122000 | -0.041439000 |
| 1 | -6.015158000 | 6.951638000 | 0.693722000  | 1 | 8.203826000  | -4.214539000 | 0.690526000  |
| 6 | -3.777267000 | 5.700840000 | -0.129913000 | 6 | 5.632706000  | -3.891468000 | -0.054641000 |
| 6 | -2.885891000 | 5.731044000 | 0.950607000  | 6 | 4.810782000  | -4.190130000 | 1.041876000  |
| 1 | -2.987419000 | 4.987782000 | 1.742504000  | 1 | 4.632838000  | -3.421417000 | 1.795403000  |
| 6 | -1.872467000 | 6.685089000 | 1.026691000  | 6 | 4.215987000  | -5.442745000 | 1.184722000  |
| 1 | -1.175939000 | 6.721849000 | 1.862961000  | 1 | 3.579426000  | -5.687343000 | 2.034140000  |
| 6 | -1.755371000 | 7.614925000 | 0.003504000  | 6 | 4.451489000  | -6.406478000 | 0.214577000  |
| 6 | -2.622580000 | 7.622259000 | -1.082509000 | 6 | 5.265401000  | -6.154357000 | -0.883523000 |
| 1 | -2.489909000 | 8.368683000 | -1.866062000 | 1 | 5.418096000  | -6.939168000 | -1.624908000 |
| 6 | -3.633024000 | 6.668755000 | -1.137220000 | 6 | 5.854186000  | -4.901014000 | -1.007045000 |
| 1 | -4.324581000 | 6.661749000 | -1.982038000 | 1 | 6.494580000  | -4.687974000 | -1.865263000 |
| 6 | -1.984472000 | 2.962282000 | 0.143412000  | 6 | 2.934535000  | -1.975965000 | 0.121615000  |
| 6 | -0.725409000 | 3.086970000 | 0.242211000  | 6 | 1.834506000  | -2.542967000 | 0.208758000  |
| 6 | 0.583438000  | 3.123210000 | 0.307849000  | 6 | 0.598664000  | -3.078912000 | 0.260292000  |
| 6 | 1.849759000  | 3.060452000 | 0.318558000  | 6 | -0.572336000 | -3.487414000 | 0.257518000  |
| 6 | 3.163819000  | 2.800958000 | 0.240342000  | 6 | -1.918424000 | -3.772922000 | 0.172371000  |
| 6 | 3.911087000  | 1.581517000 | -0.010597000 | 6 | -3.033240000 | -2.917962000 | -0.084767000 |
| 6 | 5.180684000  | 2.271491000 | -0.072191000 | 6 | -3.956150000 | -4.060107000 | -0.133521000 |
| 6 | 4.440906000  | 3.570325000 | 0.184142000  | 6 | -2.770937000 | -4.967354000 | 0.140545000  |
| 6 | 4.640004000  | 4.911495000 | 0.265794000  | 6 | -2.460469000 | -6.291462000 | 0.288052000  |
| 6 | 3.539185000  | 5.761731000 | 0.801469000  | 6 | -1.146683000 | -6.644171000 | 0.889819000  |
| 6 | 2.910024000  | 5.420073000 | 2.006969000  | 6 | -0.699452000 | -5.985897000 | 2.046479000  |
| 1 | 3.213641000  | 4.507234000 | 2.521125000  | 1 | -1.318693000 | -5.198618000 | 2.478898000  |
| 6 | 1.909190000  | 6.220393000 | 2.549753000  | 6 | 0.511779000  | -6.315553000 | 2.646410000  |
| 1 | 1.414870000  | 5.963276000 | 3.486853000  | 1 | 0.862695000  | -5.805949000 | 3.544234000  |
| 6 | 1.541708000  | 7.376801000 | 1.877483000  | 6 | 1.282342000  | -7.324074000 | 2.086459000  |
| 6 | 2.130906000  | 7.746223000 | 0.674719000  | 6 | 0.883262000  | -7.997926000 | 0.938916000  |
| 1 | 1.786244000  | 8.647649000 | 0.169610000  | 1 | 1.536369000  | -8.761620000 | 0.518096000  |
| 6 | 3.135044000  | 6.936746000 | 0.150003000  | 6 | -0.332648000 | -7.655805000 | 0.353019000  |
| 1 | 3.615435000  | 7.213636000 | -0.790641000 | 1 | -0.660603000 | -8.176051000 | -0.549255000 |
| 6 | 5.881526000  | 5.606691000 | -0.136601000 | 6 | -3.339772000 | -7.400608000 | -0.125821000 |

|   |              |               |              |   |              |               |              |
|---|--------------|---------------|--------------|---|--------------|---------------|--------------|
| 6 | 6.336944000  | 6.732741000   | 0.568692000  | 6 | -3.376849000 | -8.609588000  | 0.592661000  |
| 1 | 5.755826000  | 7.098998000   | 1.417034000  | 1 | -2.734605000 | -8.725733000  | 1.467665000  |
| 6 | 7.524055000  | 7.371864000   | 0.221717000  | 6 | -4.230046000 | -9.646660000  | 0.226177000  |
| 1 | 7.898707000  | 8.233388000   | 0.775228000  | 1 | -4.277958000 | -10.579063000 | 0.789830000  |
| 6 | 8.255907000  | 6.883803000   | -0.852758000 | 6 | -5.055005000 | -9.477993000  | -0.878420000 |
| 6 | 7.821329000  | 5.794448000   | -1.596216000 | 6 | -5.027030000 | -8.313047000  | -1.633624000 |
| 1 | 8.424698000  | 5.443397000   | -2.433603000 | 1 | -5.684792000 | -8.220727000  | -2.498400000 |
| 6 | 6.633622000  | 5.165786000   | -1.237395000 | 6 | -4.164373000 | -7.288091000  | -1.259619000 |
| 1 | 6.282720000  | 4.299123000   | -1.800442000 | 1 | -4.131820000 | -6.365459000  | -1.841924000 |
| 6 | 6.476290000  | 1.832130000   | -0.261658000 | 6 | -5.311438000 | -4.121597000  | -0.302650000 |
| 6 | 7.665424000  | 2.633443000   | 0.065440000  | 6 | -6.127156000 | -5.317370000  | -0.009063000 |
| 6 | 7.679409000  | 3.526194000   | 1.154968000  | 6 | -5.835793000 | -6.154253000  | 1.081759000  |
| 1 | 6.787762000  | 3.601982000   | 1.779995000  | 1 | -4.992430000 | -5.900819000  | 1.726662000  |
| 6 | 8.786837000  | 4.320655000   | 1.436243000  | 6 | -6.582488000 | -7.300999000  | 1.334937000  |
| 1 | 8.786640000  | 5.028444000   | 2.266161000  | 1 | -6.345988000 | -7.966506000  | 2.165702000  |
| 6 | 9.916969000  | 4.210244000   | 0.637871000  | 6 | -7.647114000 | -7.608645000  | 0.498763000  |
| 6 | 9.966186000  | 3.312719000   | -0.421652000 | 6 | -7.993107000 | -6.789128000  | -0.568163000 |
| 1 | 10.873251000 | 3.249000000   | -1.024291000 | 1 | -8.840298000 | -7.062753000  | -1.198048000 |
| 6 | 8.846568000  | 2.534433000   | -0.698671000 | 6 | -7.233966000 | -5.648448000  | -0.811524000 |
| 1 | 8.871545000  | 1.840017000   | -1.540724000 | 1 | -7.488235000 | -5.001670000  | -1.653419000 |
| 6 | 6.694656000  | 0.447148000   | -0.747414000 | 6 | -6.036902000 | -2.909124000  | -0.768188000 |
| 6 | 5.902296000  | -0.103902000  | -1.770207000 | 6 | -5.543044000 | -2.125247000  | -1.822716000 |
| 1 | 5.114122000  | 0.505935000   | -2.214114000 | 1 | -4.608225000 | -2.413548000  | -2.305084000 |
| 6 | 6.090611000  | -1.407839000  | -2.220583000 | 6 | -6.215741000 | -0.985689000  | -2.257061000 |
| 1 | 5.463478000  | -1.838551000  | -3.001583000 | 1 | -5.826679000 | -0.364059000  | -3.063519000 |
| 6 | 7.099395000  | -2.174119000  | -1.655610000 | 6 | -7.408043000 | -0.636070000  | -1.640965000 |
| 6 | 7.915707000  | -1.670388000  | -0.650370000 | 6 | -7.938481000 | -1.388030000  | -0.598906000 |
| 1 | 8.682264000  | -2.312845000  | -0.217575000 | 1 | -8.866634000 | -1.063623000  | -0.129679000 |
| 6 | 7.706537000  | -0.368773000  | -0.205226000 | 6 | -7.249377000 | -2.518757000  | -0.172715000 |
| 1 | 8.334216000  | 0.030059000   | 0.594252000  | 1 | -7.651068000 | -3.114383000  | 0.649593000  |
| 6 | 3.446928000  | 0.279001000   | -0.068720000 | 6 | -3.108926000 | -1.543226000  | -0.149762000 |
| 6 | 2.915997000  | -0.834038000  | -0.095379000 | 6 | -3.034607000 | -0.306541000  | -0.163661000 |
| 6 | 2.253752000  | -2.020946000  | -0.090792000 | 6 | -2.870017000 | 1.031535000   | -0.148697000 |
| 6 | 1.603680000  | -3.063993000  | -0.063347000 | 6 | -2.643494000 | 2.248868000   | -0.101938000 |
| 9 | 1.520438000  | -11.965811000 | -1.020601000 | 9 | -5.873096000 | 10.529891000  | -1.023155000 |
| 9 | -0.609016000 | -11.917042000 | 1.929831000  | 9 | -3.920855000 | 11.255586000  | 1.970667000  |

|   |               |              |              |   |              |               |              |
|---|---------------|--------------|--------------|---|--------------|---------------|--------------|
| 9 | -6.977627000  | -4.949526000 | 0.491836000  | 9 | 4.625155000  | 7.202625000   | 0.555515000  |
| 9 | -7.447556000  | -3.723558000 | -1.943945000 | 9 | 5.544603000  | 6.251569000   | -1.869144000 |
| 9 | -11.117867000 | 4.552988000  | 1.225312000  | 9 | 12.064607000 | -0.085869000  | 1.024428000  |
| 9 | -9.950563000  | 6.713657000  | -1.475825000 | 9 | 11.715721000 | -2.579939000  | -1.601793000 |
| 9 | -0.791222000  | 8.544045000  | 0.059191000  | 9 | 3.894810000  | -7.619509000  | 0.335104000  |
| 9 | 0.594443000   | 8.160127000  | 2.413143000  | 9 | 2.440887000  | -7.655590000  | 2.676040000  |
| 9 | 9.405981000   | 7.484297000  | -1.185353000 | 9 | -5.891822000 | -10.465361000 | -1.227890000 |
| 9 | 10.986117000  | 4.980399000  | 0.898780000  | 9 | -8.361812000 | -8.719022000  | 0.729979000  |
| 9 | 7.298462000   | -3.427040000 | -2.098131000 | 9 | -8.073704000 | 0.443981000   | -2.073262000 |
| 6 | 3.324841000   | -5.866160000 | 0.024324000  | 6 | -5.270663000 | 4.197325000   | 0.008296000  |
| 6 | 4.339757000   | -6.196096000 | -0.890890000 | 6 | -6.335382000 | 4.124602000   | -0.906199000 |
| 6 | 3.644449000   | -4.992171000 | 1.074320000  | 6 | -5.248907000 | 3.274012000   | 1.064956000  |
| 6 | 5.625055000   | -5.679813000 | -0.765842000 | 6 | -7.344378000 | 3.175438000   | -0.772926000 |
| 1 | 4.108270000   | -6.869503000 | -1.718770000 | 1 | -6.366775000 | 4.830383000   | -1.738862000 |
| 6 | 4.925021000   | -4.461318000 | 1.211815000  | 6 | -6.247716000 | 2.314788000   | 1.211954000  |
| 1 | 2.872239000   | -4.725790000 | 1.797528000  | 1 | -4.429255000 | 3.311909000   | 1.783932000  |
| 6 | 5.901150000   | -4.826018000 | 0.296743000  | 6 | -7.289671000 | 2.289755000   | 0.296875000  |
| 1 | 6.417010000   | -5.911983000 | -1.477188000 | 1 | -8.166989000 | 3.098135000   | -1.483357000 |
| 1 | 5.177517000   | -3.772898000 | 2.018265000  | 1 | -6.231654000 | 1.589961000   | 2.025905000  |
| 9 | 7.146932000   | -4.365420000 | 0.454474000  | 9 | -8.280962000 | 1.403281000   | 0.461785000  |

**3d**

**m06-2x/def2-SVP**

**0 1**

|   |              |             |              |
|---|--------------|-------------|--------------|
| 6 | -2.490813000 | 3.416042000 | -0.020774000 |
| 6 | -1.260277000 | 4.037522000 | 0.144178000  |
| 6 | -1.894932000 | 5.373321000 | 0.313542000  |
| 6 | -3.222626000 | 4.706717000 | 0.032233000  |
| 6 | -4.519037000 | 5.019733000 | -0.214362000 |
| 6 | -4.986216000 | 6.404591000 | -0.445889000 |
| 6 | -6.232321000 | 6.832668000 | 0.041389000  |
| 1 | -6.873005000 | 6.127244000 | 0.573700000  |
| 6 | -6.648423000 | 8.150707000 | -0.111741000 |
| 1 | -7.602946000 | 8.490755000 | 0.289765000  |
| 6 | -5.818643000 | 9.053303000 | -0.776357000 |
| 6 | -4.597873000 | 8.643119000 | -1.309217000 |

**3d**

**m06-2x/def2-SVP**

**0 3**

|   |              |              |              |
|---|--------------|--------------|--------------|
| 6 | -2.981665000 | -3.020814000 | 0.060091000  |
| 6 | -3.815916000 | -1.917267000 | 0.127832000  |
| 6 | -5.021536000 | -2.769228000 | 0.309617000  |
| 6 | -4.117792000 | -3.969638000 | 0.140242000  |
| 6 | -4.177451000 | -5.315504000 | -0.023245000 |
| 6 | -5.438102000 | -6.053169000 | -0.256837000 |
| 6 | -5.636115000 | -7.327232000 | 0.300512000  |
| 1 | -4.840861000 | -7.784510000 | 0.892153000  |
| 6 | -6.841787000 | -8.001483000 | 0.139695000  |
| 1 | -7.006244000 | -8.978590000 | 0.593737000  |
| 6 | -7.860248000 | -7.406146000 | -0.603987000 |
| 6 | -7.673418000 | -6.162414000 | -1.204730000 |

|   |              |              |              |   |               |              |              |
|---|--------------|--------------|--------------|---|---------------|--------------|--------------|
| 1 | -3.972545000 | 9.361450000  | -1.839272000 | 1 | -8.477387000  | -5.722734000 | -1.794918000 |
| 6 | -4.191543000 | 7.324103000  | -1.145018000 | 6 | -6.465736000  | -5.496527000 | -1.031532000 |
| 1 | -3.233809000 | 6.998588000  | -1.555141000 | 1 | -6.315257000  | -4.519881000 | -1.495233000 |
| 6 | -1.404912000 | 6.548897000  | 0.775805000  | 6 | -6.288345000  | -2.475321000 | 0.690201000  |
| 6 | -2.254636000 | 7.684064000  | 1.203015000  | 6 | -7.261750000  | -3.494369000 | 1.145864000  |
| 6 | -3.430430000 | 7.478866000  | 1.936239000  | 6 | -6.870690000  | -4.553966000 | 1.974637000  |
| 1 | -3.714483000 | 6.463214000  | 2.217805000  | 1 | -5.834258000  | -4.614253000 | 2.311723000  |
| 6 | -4.243488000 | 8.547792000  | 2.296683000  | 6 | -7.779212000  | -5.533966000 | 2.359234000  |
| 1 | -5.165525000 | 8.388281000  | 2.855617000  | 1 | -7.472374000  | -6.366820000 | 2.991846000  |
| 6 | -3.879547000 | 9.839713000  | 1.922465000  | 6 | -9.097406000  | -5.455450000 | 1.914881000  |
| 6 | -2.694274000 | 10.076632000 | 1.226466000  | 6 | -9.523907000  | -4.389324000 | 1.123033000  |
| 1 | -2.423079000 | 11.096615000 | 0.954507000  | 1 | -10.562694000 | -4.341778000 | 0.796575000  |
| 6 | -1.883844000 | 8.999965000  | 0.883222000  | 6 | -8.607587000  | -3.410606000 | 0.754172000  |
| 1 | -0.956028000 | 9.177171000  | 0.335615000  | 1 | -8.933205000  | -2.576271000 | 0.129711000  |
| 6 | 0.061534000  | 6.731697000  | 0.933321000  | 6 | -6.756400000  | -1.065031000 | 0.707066000  |
| 6 | 0.567749000  | 7.262068000  | 2.130834000  | 6 | -7.462942000  | -0.581112000 | 1.819827000  |
| 1 | -0.123332000 | 7.531799000  | 2.931636000  | 1 | -7.643334000  | -1.242940000 | 2.668934000  |
| 6 | 1.932899000  | 7.439049000  | 2.313243000  | 6 | -7.932613000  | 0.725235000  | 1.856198000  |
| 1 | 2.329616000  | 7.839402000  | 3.245958000  | 1 | -8.475501000  | 1.105074000  | 2.721442000  |
| 6 | 2.806516000  | 7.101032000  | 1.279319000  | 6 | -7.711483000  | 1.557310000  | 0.758712000  |
| 6 | 2.331635000  | 6.588545000  | 0.075164000  | 6 | -7.019598000  | 1.103945000  | -0.361039000 |
| 1 | 3.029364000  | 6.353358000  | -0.727220000 | 1 | -6.878134000  | 1.765014000  | -1.215341000 |
| 6 | 0.959991000  | 6.407774000  | -0.089627000 | 6 | -6.546323000  | -0.206525000 | -0.378747000 |
| 1 | 0.578877000  | 6.020391000  | -1.036324000 | 1 | -6.022101000  | -0.576282000 | -1.261949000 |
| 6 | 0.023990000  | 3.481898000  | 0.150440000  | 6 | -3.488378000  | -0.553519000 | 0.081872000  |
| 6 | 1.090067000  | 2.878074000  | 0.101455000  | 6 | -3.055452000  | 0.591876000  | 0.011929000  |
| 6 | 2.235465000  | 2.139294000  | 0.033219000  | 6 | -2.496756000  | 1.833373000  | -0.061753000 |
| 6 | 3.219124000  | 1.410547000  | -0.035045000 | 6 | -1.924151000  | 2.921886000  | -0.117118000 |
| 6 | 4.237504000  | 0.451739000  | -0.091894000 | 6 | -1.148082000  | 4.069238000  | -0.149505000 |
| 6 | 4.161655000  | -0.929618000 | 0.031424000  | 6 | 0.305214000   | 4.222316000  | 0.021658000  |
| 6 | 5.631005000  | -1.085440000 | -0.137125000 | 6 | 0.148738000   | 5.700160000  | -0.100289000 |
| 6 | 5.718781000  | 0.423273000  | -0.199963000 | 6 | -1.344615000  | 5.491602000  | -0.205769000 |
| 6 | 6.642084000  | 1.416565000  | -0.245488000 | 6 | -2.514333000  | 6.238122000  | -0.277871000 |
| 6 | 6.228000000  | 2.803669000  | -0.584157000 | 6 | -3.746155000  | 5.597797000  | -0.784445000 |
| 6 | 5.364653000  | 3.045591000  | -1.661371000 | 6 | -3.705985000  | 4.755312000  | -1.908205000 |
| 1 | 4.949659000  | 2.202330000  | -2.216536000 | 1 | -2.746628000  | 4.534577000  | -2.379318000 |

|   |              |              |              |   |              |              |              |
|---|--------------|--------------|--------------|---|--------------|--------------|--------------|
| 6 | 5.064316000  | 4.344312000  | -2.063938000 | 6 | -4.871091000 | 4.230901000  | -2.456008000 |
| 1 | 4.412552000  | 4.529251000  | -2.917926000 | 1 | -4.837446000 | 3.598111000  | -3.342774000 |
| 6 | 5.641136000  | 5.415413000  | -1.386583000 | 6 | -6.098594000 | 4.550911000  | -1.878594000 |
| 6 | 6.485539000  | 5.205525000  | -0.296409000 | 6 | -6.170438000 | 5.363797000  | -0.747507000 |
| 1 | 6.914791000  | 6.059494000  | 0.226181000  | 1 | -7.138928000 | 5.587153000  | -0.302697000 |
| 6 | 6.776367000  | 3.904080000  | 0.093872000  | 6 | -4.998381000 | 5.881696000  | -0.210889000 |
| 1 | 7.453806000  | 3.733410000  | 0.932457000  | 1 | -5.050512000 | 6.525290000  | 0.668832000  |
| 6 | 8.084629000  | 1.193256000  | -0.004016000 | 6 | -2.582197000 | 7.651426000  | 0.108881000  |
| 6 | 9.055904000  | 1.904000000  | -0.728783000 | 6 | -3.467205000 | 8.541583000  | -0.531514000 |
| 1 | 8.742204000  | 2.643533000  | -1.467710000 | 1 | -4.127449000 | 8.171808000  | -1.317384000 |
| 6 | 10.411957000 | 1.656632000  | -0.545769000 | 6 | -3.480665000 | 9.894535000  | -0.216993000 |
| 1 | 11.165449000 | 2.189009000  | -1.126119000 | 1 | -4.143723000 | 10.586576000 | -0.735986000 |
| 6 | 10.808983000 | 0.697332000  | 0.385404000  | 6 | -2.611328000 | 10.375838000 | 0.762534000  |
| 6 | 9.867245000  | 0.008025000  | 1.147284000  | 6 | -1.752732000 | 9.511700000  | 1.442354000  |
| 1 | 10.200366000 | -0.726600000 | 1.880330000  | 1 | -1.091382000 | 9.906244000  | 2.213660000  |
| 6 | 8.514796000  | 0.262142000  | 0.951979000  | 6 | -1.742719000 | 8.163176000  | 1.114683000  |
| 1 | 7.772299000  | -0.277375000 | 1.542917000  | 1 | -1.066470000 | 7.486687000  | 1.640477000  |
| 6 | 6.399192000  | -2.178893000 | -0.360996000 | 6 | 1.066919000  | 6.681895000  | -0.283318000 |
| 6 | 7.798710000  | -2.115265000 | -0.843281000 | 6 | 0.717427000  | 8.063862000  | -0.685759000 |
| 6 | 8.181668000  | -1.216803000 | -1.846976000 | 6 | -0.237784000 | 8.315969000  | -1.678176000 |
| 1 | 7.431216000  | -0.559951000 | -2.290914000 | 1 | -0.719533000 | 7.476305000  | -2.183055000 |
| 6 | 9.503052000  | -1.143778000 | -2.274430000 | 6 | -0.589233000 | 9.617928000  | -2.017790000 |
| 1 | 9.804985000  | -0.436349000 | -3.046686000 | 1 | -1.342518000 | 9.815522000  | -2.780369000 |
| 6 | 10.456093000 | -1.977831000 | -1.693795000 | 6 | 0.016769000  | 10.683589000 | -1.355868000 |
| 6 | 10.095376000 | -2.907612000 | -0.718540000 | 6 | 1.002752000  | 10.462293000 | -0.393996000 |
| 1 | 10.855440000 | -3.558044000 | -0.285944000 | 1 | 1.473653000  | 11.311446000 | 0.101123000  |
| 6 | 8.768301000  | -2.979445000 | -0.309815000 | 6 | 1.356642000  | 9.155963000  | -0.076305000 |
| 1 | 8.478290000  | -3.704071000 | 0.453685000  | 1 | 2.125390000  | 8.973776000  | 0.677326000  |
| 6 | 5.839786000  | -3.545346000 | -0.183531000 | 6 | 2.519808000  | 6.404540000  | -0.137235000 |
| 6 | 5.131972000  | -3.918753000 | 0.965524000  | 6 | 3.047020000  | 5.714969000  | 0.961682000  |
| 1 | 4.971423000  | -3.186453000 | 1.759106000  | 1 | 2.374948000  | 5.352135000  | 1.741363000  |
| 6 | 4.653166000  | -5.218736000 | 1.124121000  | 6 | 4.420263000  | 5.509937000  | 1.089486000  |
| 1 | 4.121052000  | -5.519778000 | 2.026936000  | 1 | 4.836581000  | 4.994829000  | 1.955430000  |
| 6 | 4.887846000  | -6.152232000 | 0.117793000  | 6 | 5.271860000  | 6.000639000  | 0.102613000  |
| 6 | 5.583347000  | -5.805786000 | -1.040588000 | 6 | 4.773457000  | 6.682204000  | -1.007315000 |
| 1 | 5.750606000  | -6.554629000 | -1.814423000 | 1 | 5.460834000  | 7.052913000  | -1.767343000 |

|   |              |               |              |   |              |              |              |
|---|--------------|---------------|--------------|---|--------------|--------------|--------------|
| 6 | 6.062408000  | -4.510384000  | -1.179264000 | 6 | 3.404941000  | 6.887993000  | -1.114893000 |
| 1 | 6.621302000  | -4.235694000  | -2.075696000 | 1 | 3.008905000  | 7.434769000  | -1.972502000 |
| 6 | 3.042586000  | -1.755090000  | 0.178102000  | 6 | 1.261773000  | 3.304789000  | 0.171217000  |
| 6 | 1.988235000  | -2.370850000  | 0.286969000  | 6 | 2.055628000  | 2.323852000  | 0.297951000  |
| 6 | 0.771828000  | -2.984347000  | 0.349510000  | 6 | 2.820967000  | 1.266993000  | 0.379035000  |
| 6 | -0.356135000 | -3.464363000  | 0.341475000  | 6 | 3.502874000  | 0.201670000  | 0.383599000  |
| 6 | -1.689281000 | -3.864098000  | 0.201935000  | 6 | 4.090892000  | -0.999845000 | 0.271278000  |
| 6 | -2.791321000 | -3.122664000  | -0.201806000 | 6 | 3.534083000  | -2.286652000 | -0.092897000 |
| 6 | -3.667353000 | -4.320330000  | -0.229418000 | 6 | 4.847799000  | -2.891311000 | -0.195045000 |
| 6 | -2.471030000 | -5.125970000  | 0.228724000  | 6 | 5.464702000  | -1.573580000 | 0.213378000  |
| 6 | -2.110969000 | -6.399460000  | 0.527206000  | 6 | 6.669242000  | -0.983299000 | 0.422543000  |
| 6 | -0.828608000 | -6.648217000  | 1.236327000  | 6 | 6.718738000  | 0.331484000  | 1.116633000  |
| 6 | -0.447210000 | -5.846095000  | 2.321337000  | 6 | 5.971547000  | 0.545400000  | 2.283759000  |
| 1 | -1.094646000 | -5.025982000  | 2.636552000  | 1 | 5.330920000  | -0.252170000 | 2.663427000  |
| 6 | 0.728073000  | -6.096171000  | 3.023023000  | 6 | 6.052718000  | 1.747355000  | 2.978785000  |
| 1 | 1.016359000  | -5.477204000  | 3.872489000  | 1 | 5.481540000  | 1.906547000  | 3.893224000  |
| 6 | 1.527673000  | -7.171634000  | 2.645605000  | 6 | 6.900023000  | 2.747576000  | 2.507870000  |
| 6 | 1.170885000  | -7.991638000  | 1.575143000  | 6 | 7.654951000  | 2.564368000  | 1.350004000  |
| 1 | 1.811525000  | -8.827051000  | 1.296638000  | 1 | 8.306772000  | 3.361694000  | 0.996526000  |
| 6 | -0.003864000 | -7.726995000  | 0.880638000  | 6 | 7.562581000  | 1.356999000  | 0.665259000  |
| 1 | -0.290595000 | -8.369200000  | 0.045941000  | 1 | 8.159162000  | 1.203477000  | -0.235927000 |
| 6 | -2.937083000 | -7.577940000  | 0.187011000  | 6 | 7.958761000  | -1.575454000 | 0.011220000  |
| 6 | -3.040532000 | -8.665757000  | 1.068850000  | 6 | 9.104142000  | -1.438884000 | 0.812634000  |
| 1 | -2.498053000 | -8.643297000  | 2.015970000  | 1 | 9.042087000  | -0.878761000 | 1.747557000  |
| 6 | -3.843781000 | -9.759811000  | 0.765675000  | 6 | 10.308752000 | -2.030395000 | 0.447876000  |
| 1 | -3.942912000 | -10.595620000 | 1.458170000  | 1 | 11.192609000 | -1.945812000 | 1.080018000  |
| 6 | -4.540164000 | -9.779191000  | -0.442790000 | 6 | 10.379926000 | -2.751220000 | -0.744237000 |
| 6 | -4.425159000 | -8.729168000  | -1.352104000 | 6 | 9.268822000  | -2.866675000 | -1.578139000 |
| 1 | -4.967508000 | -8.771642000  | -2.296584000 | 1 | 9.351341000  | -3.421334000 | -2.512761000 |
| 6 | -3.624719000 | -7.638241000  | -1.033536000 | 6 | 8.068347000  | -2.279337000 | -1.196959000 |
| 1 | -3.530678000 | -6.810439000  | -1.739039000 | 1 | 7.192549000  | -2.368105000 | -1.842764000 |
| 6 | -4.988727000 | -4.447415000  | -0.507940000 | 6 | 5.223390000  | -4.187109000 | -0.484333000 |
| 6 | -5.789277000 | -5.645307000  | -0.175547000 | 6 | 6.557875000  | -4.724432000 | -0.173635000 |
| 6 | -5.594406000 | -6.323371000  | 1.036051000  | 6 | 7.230709000  | -4.347174000 | 0.999715000  |
| 1 | -4.847478000 | -5.951617000  | 1.740162000  | 1 | 6.745215000  | -3.659307000 | 1.694570000  |
| 6 | -6.333686000 | -7.458468000  | 1.348171000  | 6 | 8.500374000  | -4.832253000 | 1.286392000  |

|    |              |               |              |    |               |              |              |
|----|--------------|---------------|--------------|----|---------------|--------------|--------------|
| 1  | -6.177728000 | -7.990315000  | 2.286674000  | 1  | 9.024248000   | -4.532907000 | 2.194065000  |
| 6  | -7.282999000 | -7.925311000  | 0.440533000  | 6  | 9.116861000   | -5.704686000 | 0.390405000  |
| 6  | -7.516615000 | -7.254908000  | -0.760108000 | 6  | 8.462558000   | -6.119392000 | -0.770243000 |
| 1  | -8.269855000 | -7.633428000  | -1.450935000 | 1  | 8.961386000   | -6.806262000 | -1.453828000 |
| 6  | -6.777529000 | -6.114274000  | -1.055448000 | 6  | 7.187050000   | -5.637468000 | -1.039189000 |
| 1  | -6.955451000 | -5.585201000  | -1.993738000 | 1  | 6.674838000   | -5.952399000 | -1.950207000 |
| 6  | -5.698823000 | -3.317314000  | -1.163087000 | 6  | 4.239968000   | -5.107766000 | -1.095470000 |
| 6  | -5.131483000 | -2.650800000  | -2.257943000 | 6  | 3.372614000   | -4.679581000 | -2.113366000 |
| 1  | -4.162534000 | -2.976412000  | -2.640850000 | 1  | 3.435072000   | -3.652218000 | -2.475564000 |
| 6  | -5.788346000 | -1.589253000  | -2.872991000 | 6  | 2.445486000   | -5.546783000 | -2.681366000 |
| 1  | -5.345196000 | -1.071064000  | -3.723066000 | 1  | 1.773280000   | -5.210609000 | -3.470456000 |
| 6  | -7.036401000 | -1.195766000  | -2.396718000 | 6  | 2.389074000   | -6.867206000 | -2.240047000 |
| 6  | -7.636057000 | -1.856035000  | -1.323732000 | 6  | 3.253284000   | -7.328920000 | -1.246812000 |
| 1  | -8.613712000 | -1.532959000  | -0.970389000 | 1  | 3.193753000   | -8.365863000 | -0.920308000 |
| 6  | -6.966719000 | -2.912858000  | -0.717709000 | 6  | 4.170013000   | -6.450899000 | -0.683747000 |
| 1  | -7.431183000 | -3.432725000  | 0.122400000  | 1  | 4.840498000   | -6.806578000 | 0.100378000  |
| 6  | -2.937569000 | -1.739326000  | -0.340942000 | 6  | 2.202382000   | -2.669900000 | -0.170380000 |
| 6  | -2.961506000 | -0.514213000  | -0.359820000 | 6  | 0.990161000   | -2.871251000 | -0.177715000 |
| 6  | -2.909012000 | 0.847099000   | -0.308348000 | 6  | -0.365124000  | -3.020656000 | -0.142005000 |
| 6  | -2.788143000 | 2.062004000   | -0.202807000 | 6  | -1.585829000  | -3.087331000 | -0.070437000 |
| 6  | -5.555291000 | 3.952999000   | -0.233111000 | 6  | -2.929384000  | -6.121196000 | 0.038392000  |
| 6  | -6.556626000 | 3.944305000   | -1.217437000 | 6  | -2.686739000  | -7.139024000 | -0.897986000 |
| 6  | -5.614944000 | 2.996194000   | 0.788928000  | 6  | -2.005355000  | -5.931927000 | 1.074583000  |
| 6  | -7.597771000 | 3.024983000   | -1.173910000 | 6  | -1.560050000  | -7.946926000 | -0.803565000 |
| 1  | -6.525207000 | 4.683675000   | -2.019874000 | 1  | -3.400204000  | -7.302692000 | -1.707832000 |
| 6  | -6.653855000 | 2.070319000   | 0.847164000  | 6  | -0.872820000  | -6.734871000 | 1.183337000  |
| 1  | -4.855053000 | 3.000126000   | 1.572661000  | 1  | -2.190590000  | -5.160265000 | 1.824099000  |
| 6  | -7.650342000 | 2.107618000   | -0.124171000 | 6  | -0.667063000  | -7.746530000 | 0.249564000  |
| 1  | -8.380323000 | 3.022436000   | -1.932119000 | 1  | -1.369732000  | -8.737432000 | -1.528691000 |
| 1  | -6.713116000 | 1.343333000   | 1.656802000  | 1  | -0.163211000  | -6.597857000 | 1.998929000  |
| 17 | -8.187160000 | -9.355449000  | 0.818427000  | 17 | 10.716818000  | -6.276862000 | 0.728744000  |
| 17 | -5.562729000 | -11.125661000 | -0.825547000 | 17 | 11.867830000  | -3.512950000 | -1.203206000 |
| 17 | -7.868513000 | 0.116302000   | -3.172995000 | 17 | 1.246408000   | -7.960005000 | -2.955869000 |
| 17 | -9.015198000 | 1.041320000   | 0.008078000  | 17 | 0.692530000   | -8.812019000 | 0.430868000  |
| 17 | -6.303250000 | 10.709260000  | -0.943305000 | 17 | -9.381873000  | -8.216781000 | -0.786806000 |
| 17 | -4.920647000 | 11.165205000  | 2.329661000  | 17 | -10.216319000 | -6.705285000 | 2.354003000  |

|    |              |              |              |    |              |              |              |
|----|--------------|--------------|--------------|----|--------------|--------------|--------------|
| 17 | 4.510494000  | 7.351550000  | 1.505527000  | 17 | -8.345590000 | 3.175173000  | 0.791330000  |
| 17 | 5.326356000  | 7.037206000  | -1.926383000 | 17 | -7.561422000 | 3.950080000  | -2.597425000 |
| 17 | 12.493371000 | 0.349661000  | 0.601180000  | 17 | -2.584365000 | 12.066084000 | 1.137222000  |
| 17 | 12.111409000 | -1.850468000 | -2.194092000 | 17 | -0.471661000 | 12.303517000 | -1.734723000 |
| 17 | 4.343260000  | -7.790890000 | 0.306465000  | 17 | 6.991123000  | 5.802540000  | 0.256487000  |
| 17 | 2.975871000  | -7.511515000 | 3.545030000  | 17 | 7.037037000  | 4.232386000  | 3.402275000  |

|                        |              |              |              |                        |              |               |              |
|------------------------|--------------|--------------|--------------|------------------------|--------------|---------------|--------------|
| <b>3d</b>              |              |              |              | <b>3d</b>              |              |               |              |
| <b>m06-2x/def2-SVP</b> |              |              |              | <b>m06-2x/def2-SVP</b> |              |               |              |
| <b>-2 1</b>            |              |              |              | <b>-2 3</b>            |              |               |              |
| 6                      | 0.372311000  | 4.228735000  | 0.114309000  | 6                      | 1.963552000  | -3.741624000  | 0.048951000  |
| 6                      | 1.730569000  | 3.903714000  | 0.185105000  | 6                      | 0.614196000  | -4.202209000  | 0.173312000  |
| 6                      | 2.110262000  | 5.333082000  | 0.315895000  | 6                      | 1.065339000  | -5.597411000  | 0.312256000  |
| 6                      | 0.651239000  | 5.675828000  | 0.122665000  | 6                      | 2.482706000  | -5.113010000  | 0.064894000  |
| 6                      | -0.162050000 | 6.754021000  | -0.074206000 | 6                      | 3.738595000  | -5.611852000  | -0.153209000 |
| 6                      | 0.337436000  | 8.103890000  | -0.405208000 | 6                      | 4.013214000  | -7.027276000  | -0.466803000 |
| 6                      | -0.321691000 | 9.257214000  | 0.057663000  | 6                      | 5.190347000  | -7.659728000  | -0.023888000 |
| 1                      | -1.229542000 | 9.148205000  | 0.653778000  | 1                      | 5.922237000  | -7.083410000  | 0.544940000  |
| 6                      | 0.177523000  | 10.530294000 | -0.197888000 | 6                      | 5.424504000  | -9.010171000  | -0.260878000 |
| 1                      | -0.323226000 | 11.419119000 | 0.186593000  | 1                      | 6.325307000  | -9.499063000  | 0.111037000  |
| 6                      | 1.349382000  | 10.665096000 | -0.939460000 | 6                      | 4.476513000  | -9.752148000  | -0.962235000 |
| 6                      | 2.004061000  | 9.545335000  | -1.445981000 | 6                      | 3.319878000  | -9.148779000  | -1.449008000 |
| 1                      | 2.914252000  | 9.670955000  | -2.032742000 | 1                      | 2.592827000  | -9.742705000  | -2.003312000 |
| 6                      | 1.491305000  | 8.279090000  | -1.186597000 | 6                      | 3.101929000  | -7.796549000  | -1.209939000 |
| 1                      | 2.002582000  | 7.398375000  | -1.579390000 | 1                      | 2.193772000  | -7.321375000  | -1.585173000 |
| 6                      | 3.272463000  | 5.943017000  | 0.671669000  | 6                      | 0.427490000  | -6.738978000  | 0.707271000  |
| 6                      | 3.355656000  | 7.371459000  | 1.056299000  | 6                      | 1.130079000  | -7.980173000  | 1.099570000  |
| 6                      | 2.366097000  | 7.977407000  | 1.842712000  | 6                      | 2.315383000  | -7.950812000  | 1.849198000  |
| 1                      | 1.527777000  | 7.375051000  | 2.196902000  | 1                      | 2.717500000  | -6.986394000  | 2.164378000  |
| 6                      | 2.420421000  | 9.333739000  | 2.149966000  | 6                      | 2.998088000  | -9.120547000  | 2.168151000  |
| 1                      | 1.633960000  | 9.806552000  | 2.738362000  | 1                      | 3.933446000  | -9.087650000  | 2.727138000  |
| 6                      | 3.485130000  | 10.097165000 | 1.681088000  | 6                      | 2.486995000  | -10.345653000 | 1.750320000  |
| 6                      | 4.511083000  | 9.514654000  | 0.938666000  | 6                      | 1.286324000  | -10.415295000 | 1.046076000  |
| 1                      | 5.340229000  | 10.129480000 | 0.588063000  | 1                      | 0.899165000  | -11.385264000 | 0.733122000  |
| 6                      | 4.443691000  | 8.157956000  | 0.640748000  | 6                      | 0.615563000  | -9.237481000  | 0.734866000  |
| 1                      | 5.237380000  | 7.695827000  | 0.050170000  | 1                      | -0.319049000 | -9.283769000  | 0.172096000  |

|   |             |              |              |   |               |              |              |
|---|-------------|--------------|--------------|---|---------------|--------------|--------------|
| 6 | 4.536247000 | 5.166364000  | 0.763818000  | 6 | -1.050570000  | -6.755210000 | 0.849368000  |
| 6 | 5.387384000 | 5.349708000  | 1.867067000  | 6 | -1.640788000  | -7.356391000 | 1.975425000  |
| 1 | 5.102413000 | 6.057118000  | 2.648243000  | 1 | -0.999000000  | -7.803858000 | 2.736799000  |
| 6 | 6.575977000 | 4.641163000  | 1.986576000  | 6 | -3.019358000  | -7.380954000 | 2.144390000  |
| 1 | 7.229474000 | 4.777095000  | 2.848359000  | 1 | -3.471524000  | -7.837898000 | 3.024831000  |
| 6 | 6.931832000 | 3.736509000  | 0.986959000  | 6 | -3.833438000  | -6.800435000 | 1.172922000  |
| 6 | 6.114412000 | 3.533886000  | -0.120825000 | 6 | -3.284410000  | -6.201935000 | 0.043358000  |
| 1 | 6.413033000 | 2.826841000  | -0.893918000 | 1 | -3.935631000  | -5.756641000 | -0.707522000 |
| 6 | 4.926644000 | 4.255439000  | -0.226789000 | 6 | -1.899635000  | -6.190300000 | -0.112462000 |
| 1 | 4.289469000 | 4.108874000  | -1.100022000 | 1 | -1.466549000  | -5.730688000 | -1.001723000 |
| 6 | 2.353608000 | 2.660078000  | 0.163158000  | 6 | -0.566133000  | -3.487473000 | 0.169754000  |
| 6 | 2.748042000 | 1.492560000  | 0.088110000  | 6 | -1.535789000  | -2.718127000 | 0.103668000  |
| 6 | 3.110754000 | 0.191619000  | 0.006104000  | 6 | -2.540259000  | -1.817717000 | 0.026667000  |
| 6 | 3.351520000 | -1.022239000 | -0.048091000 | 6 | -3.403405000  | -0.932241000 | -0.040877000 |
| 6 | 3.487345000 | -2.392130000 | -0.093510000 | 6 | -4.246959000  | 0.161726000  | -0.100876000 |
| 6 | 2.463958000 | -3.436309000 | 0.021024000  | 6 | -3.964556000  | 1.561506000  | -0.014529000 |
| 6 | 3.538492000 | -4.464623000 | -0.103877000 | 6 | -5.393682000  | 1.893217000  | -0.162602000 |
| 6 | 4.567224000 | -3.348235000 | -0.124098000 | 6 | -5.688574000  | 0.405324000  | -0.171441000 |
| 6 | 5.944682000 | -3.205600000 | -0.159610000 | 6 | -6.762306000  | -0.448633000 | -0.186564000 |
| 6 | 6.524252000 | -1.916782000 | -0.602938000 | 6 | -6.560062000  | -1.872041000 | -0.557119000 |
| 6 | 5.977959000 | -1.211079000 | -1.691070000 | 6 | -5.735773000  | -2.222778000 | -1.638924000 |
| 1 | 5.074279000 | -1.592739000 | -2.169019000 | 1 | -5.186353000  | -1.439748000 | -2.163751000 |
| 6 | 6.573249000 | -0.056229000 | -2.186807000 | 6 | -5.627602000  | -3.540909000 | -2.072203000 |
| 1 | 6.146577000 | 0.466929000  | -3.043128000 | 1 | -4.997857000  | -3.798134000 | -2.924181000 |
| 6 | 7.742182000 | 0.417311000  | -1.595471000 | 6 | -6.357285000  | -4.533083000 | -1.423010000 |
| 6 | 8.295381000 | -0.232378000 | -0.495007000 | 6 | -7.157053000  | -4.227919000 | -0.323680000 |
| 1 | 9.194614000 | 0.167492000  | -0.026843000 | 1 | -7.696664000  | -5.023666000 | 0.189003000  |
| 6 | 7.684039000 | -1.383357000 | -0.008891000 | 6 | -7.251165000  | -2.906239000 | 0.098414000  |
| 1 | 8.121058000 | -1.894617000 | 0.850811000  | 1 | -7.886490000  | -2.662250000 | 0.951918000  |
| 6 | 6.873838000 | -4.274156000 | 0.228369000  | 6 | -8.138246000  | -0.027242000 | 0.135691000  |
| 6 | 8.150796000 | -4.403827000 | -0.360066000 | 6 | -9.255424000  | -0.611405000 | -0.492404000 |
| 1 | 8.465585000 | -3.678320000 | -1.112109000 | 1 | -9.100202000  | -1.407173000 | -1.223059000 |
| 6 | 9.002979000 | -5.455225000 | -0.042440000 | 6 | -10.549319000 | -0.171580000 | -0.234749000 |
| 1 | 9.973940000 | -5.556850000 | -0.528612000 | 1 | -11.405425000 | -0.610174000 | -0.748156000 |
| 6 | 8.593409000 | -6.411110000 | 0.885142000  | 6 | -10.747280000 | 0.867232000  | 0.672499000  |
| 6 | 7.355630000 | -6.298450000 | 1.513156000  | 6 | -9.668843000  | 1.442163000  | 1.339586000  |

|   |              |              |              |   |               |             |              |
|---|--------------|--------------|--------------|---|---------------|-------------|--------------|
| 1 | 7.051735000  | -7.047876000 | 2.244806000  | 1 | -9.842410000  | 2.248536000 | 2.052542000  |
| 6 | 6.518942000  | -5.235084000 | 1.195813000  | 6 | -8.381519000  | 0.986614000 | 1.078518000  |
| 1 | 5.550595000  | -5.147973000 | 1.692037000  | 1 | -7.533818000  | 1.437926000 | 1.597268000  |
| 6 | 3.471569000  | -5.797941000 | -0.357575000 | 6 | -6.042473000  | 3.072921000 | -0.386301000 |
| 6 | 4.634356000  | -6.624402000 | -0.763206000 | 6 | -7.449573000  | 3.166308000 | -0.835901000 |
| 6 | 5.567928000  | -6.167284000 | -1.701437000 | 6 | -7.975833000  | 2.285191000 | -1.791498000 |
| 1 | 5.431732000  | -5.180087000 | -2.146475000 | 1 | -7.325534000  | 1.520299000 | -2.219671000 |
| 6 | 6.679190000  | -6.933423000 | -2.040761000 | 6 | -9.311512000  | 2.350994000 | -2.176430000 |
| 1 | 7.419387000  | -6.562110000 | -2.749420000 | 1 | -9.720763000  | 1.645177000 | -2.899447000 |
| 6 | 6.859756000  | -8.176458000 | -1.442361000 | 6 | -10.137662000 | 3.319334000 | -1.614316000 |
| 6 | 5.925346000  | -8.679639000 | -0.539273000 | 6 | -9.636169000  | 4.240731000 | -0.696672000 |
| 1 | 6.084227000  | -9.658339000 | -0.086251000 | 1 | -10.298612000 | 4.995208000 | -0.271819000 |
| 6 | 4.816132000  | -7.905680000 | -0.216091000 | 6 | -8.299040000  | 4.162998000 | -0.322926000 |
| 1 | 4.082496000  | -8.286819000 | 0.497285000  | 1 | -7.901784000  | 4.874490000 | 0.403902000  |
| 6 | 2.172658000  | -6.522235000 | -0.306476000 | 6 | -5.320834000  | 4.366418000 | -0.263567000 |
| 6 | 1.260205000  | -6.359477000 | 0.743867000  | 6 | -4.476879000  | 4.657402000 | 0.817854000  |
| 1 | 1.492912000  | -5.661284000 | 1.548825000  | 1 | -4.327492000  | 3.905622000 | 1.594216000  |
| 6 | 0.065903000  | -7.078897000 | 0.783020000  | 6 | -3.832160000  | 5.889167000 | 0.925520000  |
| 1 | -0.637372000 | -6.957451000 | 1.606676000  | 1 | -3.184081000  | 6.114027000 | 1.772747000  |
| 6 | -0.215987000 | -7.976374000 | -0.242072000 | 6 | -4.038867000  | 6.848914000 | -0.060749000 |
| 6 | 0.666209000  | -8.155435000 | -1.305931000 | 6 | -4.867020000  | 6.591258000 | -1.151765000 |
| 1 | 0.417786000  | -8.857225000 | -2.102089000 | 1 | -5.004986000  | 7.354984000 | -1.917273000 |
| 6 | 1.852512000  | -7.433614000 | -1.326961000 | 6 | -5.501654000  | 5.359327000 | -1.242686000 |
| 1 | 2.552302000  | -7.574506000 | -2.152811000 | 1 | -6.153307000  | 5.153399000 | -2.093927000 |
| 6 | 1.132059000  | -3.379362000 | 0.138033000  | 6 | -2.764090000  | 2.226337000 | 0.094788000  |
| 6 | -0.111203000 | -3.153537000 | 0.257767000  | 6 | -1.617417000  | 2.689550000 | 0.198392000  |
| 6 | -1.378893000 | -2.831866000 | 0.342233000  | 6 | -0.339283000  | 3.110526000 | 0.264101000  |
| 6 | -2.582030000 | -2.431319000 | 0.364555000  | 6 | 0.863353000   | 3.414667000 | 0.271543000  |
| 6 | -3.783048000 | -1.841340000 | 0.285259000  | 6 | 2.227444000   | 3.587614000 | 0.182583000  |
| 6 | -4.191380000 | -0.473372000 | 0.003503000  | 6 | 3.263196000   | 2.651032000 | -0.123751000 |
| 6 | -5.590530000 | -0.818482000 | -0.076973000 | 6 | 4.275235000   | 3.712302000 | -0.162126000 |
| 6 | -5.215353000 | -2.255194000 | 0.235868000  | 6 | 3.180269000   | 4.703759000 | 0.186576000  |
| 6 | -5.766680000 | -3.490351000 | 0.373523000  | 6 | 3.002217000   | 6.042660000 | 0.412636000  |
| 6 | -4.956750000 | -4.585437000 | 0.976358000  | 6 | 1.755503000   | 6.503363000 | 1.075996000  |
| 6 | -4.216088000 | -4.361076000 | 2.146040000  | 6 | 1.227177000   | 5.805580000 | 2.174544000  |
| 1 | -4.195933000 | -3.359648000 | 2.577610000  | 1 | 1.723633000   | 4.895841000 | 2.514802000  |

|   |               |              |              |   |              |              |              |
|---|---------------|--------------|--------------|---|--------------|--------------|--------------|
| 6 | -3.518404000  | -5.391871000 | 2.767900000  | 6 | 0.094924000  | 6.256312000  | 2.845253000  |
| 1 | -2.949699000  | -5.212115000 | 3.680101000  | 1 | -0.303016000 | 5.708564000  | 3.699517000  |
| 6 | -3.567452000  | -6.670612000 | 2.220833000  | 6 | -0.521143000 | 7.431650000  | 2.425494000  |
| 6 | -4.280953000  | -6.925629000 | 1.051916000  | 6 | -0.031838000 | 8.145415000  | 1.333658000  |
| 1 | -4.287859000  | -7.929493000 | 0.629660000  | 1 | -0.540528000 | 9.052042000  | 1.008116000  |
| 6 | -4.971255000  | -5.882508000 | 0.441827000  | 6 | 1.098036000  | 7.677506000  | 0.670516000  |
| 1 | -5.541040000  | -6.076891000 | -0.468891000 | 1 | 1.484634000  | 8.235156000  | -0.184644000 |
| 6 | -7.145145000  | -3.839787000 | -0.033971000 | 6 | 3.980743000  | 7.075598000  | 0.022835000  |
| 6 | -7.916916000  | -4.745529000 | 0.712888000  | 6 | 4.187738000  | 8.225151000  | 0.807569000  |
| 1 | -7.487525000  | -5.201234000 | 1.607133000  | 1 | 3.606619000  | 8.356012000  | 1.722398000  |
| 6 | -9.225639000  | -5.050078000 | 0.351771000  | 6 | 5.135346000  | 9.182161000  | 0.459559000  |
| 1 | -9.831432000  | -5.732894000 | 0.947713000  | 1 | 5.306925000  | 10.058551000 | 1.085101000  |
| 6 | -9.771527000  | -4.454693000 | -0.783186000 | 6 | 5.889744000  | 9.003042000  | -0.698251000 |
| 6 | -9.020311000  | -3.579871000 | -1.563367000 | 6 | 5.688340000  | 7.892932000  | -1.514219000 |
| 1 | -9.465551000  | -3.125680000 | -2.448486000 | 1 | 6.283688000  | 7.772260000  | -2.419477000 |
| 6 | -7.714511000  | -3.282779000 | -1.188653000 | 6 | 4.734517000  | 6.946738000  | -1.155958000 |
| 1 | -7.122087000  | -2.586764000 | -1.785454000 | 1 | 4.573578000  | 6.072897000  | -1.790114000 |
| 6 | -6.731314000  | -0.074929000 | -0.329402000 | 6 | 5.625294000  | 3.672308000  | -0.390569000 |
| 6 | -8.082799000  | -0.536343000 | 0.017623000  | 6 | 6.544803000  | 4.772677000  | -0.041513000 |
| 6 | -8.319151000  | -1.315914000 | 1.166042000  | 6 | 6.351578000  | 5.535037000  | 1.122392000  |
| 1 | -7.477643000  | -1.555710000 | 1.818865000  | 1 | 5.511962000  | 5.292539000  | 1.776508000  |
| 6 | -9.585605000  | -1.799489000 | 1.475247000  | 6 | 7.190088000  | 6.597681000  | 1.441239000  |
| 1 | -9.746649000  | -2.421202000 | 2.356581000  | 1 | 7.018290000  | 7.197741000  | 2.335064000  |
| 6 | -10.659379000 | -1.489245000 | 0.645256000  | 6 | 8.255535000  | 6.903215000  | 0.598898000  |
| 6 | -10.475486000 | -0.685038000 | -0.478538000 | 6 | 8.500012000  | 6.145172000  | -0.544695000 |
| 1 | -11.326801000 | -0.450155000 | -1.118454000 | 1 | 9.341080000  | 6.398807000  | -1.190480000 |
| 6 | -9.201796000  | -0.216637000 | -0.780089000 | 6 | 7.650995000  | 5.087166000  | -0.852167000 |
| 1 | -9.056698000  | 0.395719000  | -1.672235000 | 1 | 7.831876000  | 4.499134000  | -1.754083000 |
| 6 | -6.598639000  | 1.278501000  | -0.914443000 | 6 | 6.226376000  | 2.450291000  | -0.983471000 |
| 6 | -5.640029000  | 1.563206000  | -1.904887000 | 6 | 5.594409000  | 1.766017000  | -2.034523000 |
| 1 | -4.972204000  | 0.769048000  | -2.241122000 | 1 | 4.640190000  | 2.135234000  | -2.412307000 |
| 6 | -5.524031000  | 2.828632000  | -2.470934000 | 6 | 6.159049000  | 0.629543000  | -2.605581000 |
| 1 | -4.770272000  | 3.031725000  | -3.231758000 | 1 | 5.654049000  | 0.100459000  | -3.413504000 |
| 6 | -6.388877000  | 3.840866000  | -2.064343000 | 6 | 7.387704000  | 0.171685000  | -2.139086000 |
| 6 | -7.355315000  | 3.599001000  | -1.090534000 | 6 | 8.048642000  | 0.830545000  | -1.103838000 |
| 1 | -8.015240000  | 4.406259000  | -0.773382000 | 1 | 9.003410000  | 0.448657000  | -0.744661000 |

|                        |               |              |              |                        |               |               |              |
|------------------------|---------------|--------------|--------------|------------------------|---------------|---------------|--------------|
| 6                      | -7.448414000  | 2.332782000  | -0.524246000 | 6                      | 7.464841000   | 1.957613000   | -0.535762000 |
| 1                      | -8.198078000  | 2.151549000  | 0.248153000  | 1                      | 7.977667000   | 2.470192000   | 0.280411000  |
| 6                      | -3.409853000  | 0.667008000  | -0.051490000 | 6                      | 3.229322000   | 1.274994000   | -0.205377000 |
| 6                      | -2.608838000  | 1.605414000  | -0.063139000 | 6                      | 3.062236000   | 0.047545000   | -0.208959000 |
| 6                      | -1.657504000  | 2.574813000  | -0.031362000 | 6                      | 2.794105000   | -1.273540000  | -0.165395000 |
| 6                      | -0.751171000  | 3.404500000  | 0.021108000  | 6                      | 2.468945000   | -2.466571000  | -0.087500000 |
| 6                      | -1.634184000  | 6.584494000  | 0.043525000  | 6                      | 4.909817000   | -4.699842000  | -0.074378000 |
| 6                      | -2.512480000  | 7.177619000  | -0.879086000 | 6                      | 5.964362000   | -4.783834000  | -0.999809000 |
| 6                      | -2.190445000  | 5.868793000  | 1.114136000  | 6                      | 5.031162000   | -3.772785000  | 0.972512000  |
| 6                      | -3.891689000  | 7.076262000  | -0.735185000 | 6                      | 7.106447000   | -3.999959000  | -0.874515000 |
| 1                      | -2.100801000  | 7.732020000  | -1.724909000 | 1                      | 5.887742000   | -5.489410000  | -1.829494000 |
| 6                      | -3.569049000  | 5.753683000  | 1.270265000  | 6                      | 6.164880000   | -2.976974000  | 1.109999000  |
| 1                      | -1.527945000  | 5.403717000  | 1.845839000  | 1                      | 4.224377000   | -3.686513000  | 1.701907000  |
| 6                      | -4.410758000  | 6.374349000  | 0.352458000  | 6                      | 7.205130000   | -3.112490000  | 0.195589000  |
| 1                      | -4.571448000  | 7.528394000  | -1.456598000 | 1                      | 7.921685000   | -4.068980000  | -1.594329000 |
| 1                      | -3.994100000  | 5.196171000  | 2.104536000  | 1                      | 6.252982000   | -2.265130000  | 1.930454000  |
| 17                     | -12.245205000 | -2.118398000 | 1.017117000  | 17                     | 9.291952000   | 8.252250000   | 0.982628000  |
| 17                     | -11.417299000 | -4.805572000 | -1.236448000 | 17                     | 7.101601000   | 10.178603000  | -1.134433000 |
| 17                     | -6.277293000  | 5.422651000  | -2.798960000 | 17                     | 8.121624000   | -1.225867000  | -2.881749000 |
| 17                     | -6.133672000  | 6.313656000  | 0.593478000  | 17                     | 8.672761000   | -2.198511000  | 0.423224000  |
| 17                     | 2.010470000   | 12.250062000 | -1.236499000 | 17                     | 4.732569000   | -11.456075000 | -1.230691000 |
| 17                     | 3.526864000   | 11.805198000 | 2.022365000  | 17                     | 3.368277000   | -11.807023000 | 2.108576000  |
| 17                     | 8.435127000   | 2.869281000  | 1.134631000  | 17                     | -5.564145000  | -6.846689000  | 1.386810000  |
| 17                     | 8.530103000   | 1.832740000  | -2.254194000 | 17                     | -6.285176000  | -6.176062000  | -2.008815000 |
| 17                     | 9.629193000   | -7.766228000 | 1.258533000  | 17                     | -12.358030000 | 1.464656000   | 0.972142000  |
| 17                     | 8.283421000   | -9.107175000 | -1.822816000 | 17                     | -11.822560000 | 3.369228000   | -2.060354000 |
| 17                     | -1.679939000  | -8.924989000 | -0.200739000 | 17                     | -3.278089000  | 8.413796000   | 0.064616000  |
| 17                     | -2.742738000  | -7.977837000 | 3.032732000  | 17                     | -1.912050000  | 8.027649000   | 3.296917000  |
| <b>3m</b>              |               |              |              | <b>3m</b>              |               |               |              |
| <b>m06-2x/def2-SVP</b> |               |              |              | <b>m06-2x/def2-SVP</b> |               |               |              |
| <b>0 1</b>             |               |              |              | <b>0 3</b>             |               |               |              |
| 6                      | 3.727879000   | 2.024776000  | -0.000077000 | 6                      | -3.432044000  | 2.533320000   | -0.000039000 |
| 6                      | 4.181741000   | 0.714723000  | -0.000061000 | 6                      | -2.352420000  | 3.516197000   | 0.000213000  |
| 6                      | 5.603834000   | 1.145052000  | -0.000052000 | 6                      | -3.386361000  | 4.593467000   | -0.000007000 |
| 6                      | 5.111422000   | 2.566416000  | -0.000023000 | 6                      | -4.420009000  | 3.514077000   | -0.000216000 |

|   |              |              |              |   |              |              |              |
|---|--------------|--------------|--------------|---|--------------|--------------|--------------|
| 6 | 5.659975000  | 3.778970000  | 0.000048000  | 6 | -5.868512000 | 3.524189000  | -0.000429000 |
| 6 | 6.784997000  | 0.531767000  | -0.000012000 | 6 | -3.394434000 | 5.925642000  | 0.000039000  |
| 6 | 3.481013000  | -0.497533000 | -0.000069000 | 6 | -0.999766000 | 3.390953000  | 0.000276000  |
| 6 | 2.760343000  | -1.487280000 | -0.000078000 | 6 | 0.217998000  | 3.140879000  | 0.000290000  |
| 6 | 1.866086000  | -2.519551000 | -0.000076000 | 6 | 1.511666000  | 2.763309000  | 0.000210000  |
| 6 | 0.989295000  | -3.374073000 | -0.000078000 | 6 | 2.663671000  | 2.322149000  | 0.000118000  |
| 6 | -0.110414000 | -4.240799000 | 0.000001000  | 6 | 3.900238000  | 1.688031000  | 0.000047000  |
| 6 | -1.471880000 | -3.978799000 | -0.000081000 | 6 | 4.237951000  | 0.334922000  | -0.000032000 |
| 6 | -1.810265000 | -5.425538000 | 0.000050000  | 6 | 5.689143000  | 0.635304000  | -0.000212000 |
| 6 | -0.333136000 | -5.709794000 | 0.000117000  | 6 | 5.330420000  | 2.095677000  | -0.000025000 |
| 6 | 0.442656000  | -6.791184000 | 0.000294000  | 6 | 5.989490000  | 3.252044000  | 0.000060000  |
| 6 | -2.931990000 | -6.141769000 | 0.000078000  | 6 | 6.812687000  | -0.081139000 | -0.000449000 |
| 6 | -2.171387000 | -2.765844000 | -0.000208000 | 6 | 3.429947000  | -0.807030000 | 0.000005000  |
| 6 | -2.668236000 | -1.646867000 | -0.000262000 | 6 | 2.620299000  | -1.726140000 | 0.000048000  |
| 6 | -3.115081000 | -0.356287000 | -0.000156000 | 6 | 1.633916000  | -2.671755000 | 0.000111000  |
| 6 | -3.416759000 | 0.830287000  | -0.000067000 | 6 | 0.683258000  | -3.442759000 | 0.000149000  |
| 6 | -3.617496000 | 2.216028000  | 0.000018000  | 6 | -0.490815000 | -4.208813000 | 0.000044000  |
| 6 | -2.709832000 | 3.264062000  | 0.000144000  | 6 | -1.822808000 | -3.830338000 | -0.000009000 |
| 6 | -3.793521000 | 4.280515000  | 0.000131000  | 6 | -2.287075000 | -5.240891000 | -0.000016000 |
| 6 | -4.778297000 | 3.143431000  | -0.000023000 | 6 | -0.840310000 | -5.652925000 | 0.000014000  |
| 6 | -6.102715000 | 3.012349000  | -0.000187000 | 6 | -0.161221000 | -6.797441000 | 0.000084000  |
| 6 | -3.852867000 | 5.610053000  | 0.000217000  | 6 | -3.466806000 | -5.857278000 | -0.000107000 |
| 6 | -1.309629000 | 3.263278000  | 0.000155000  | 6 | -2.416037000 | -2.558471000 | 0.000061000  |
| 6 | -0.092149000 | 3.134009000  | 0.000110000  | 6 | -2.816854000 | -1.403277000 | 0.000098000  |
| 6 | 1.248961000  | 2.875762000  | 0.000026000  | 6 | -3.156581000 | -0.076542000 | 0.000020000  |
| 6 | 2.427420000  | 2.543794000  | -0.000040000 | 6 | -3.370284000 | 1.126390000  | -0.000032000 |
| 1 | 0.006326000  | -7.791091000 | 0.000336000  | 1 | 7.080302000  | 3.272899000  | 0.000012000  |
| 1 | 1.529727000  | -6.698366000 | 0.000367000  | 1 | 5.451245000  | 4.201082000  | 0.000213000  |
| 1 | -2.897846000 | -7.232196000 | 0.000104000  | 1 | 7.787143000  | 0.409285000  | -0.000566000 |
| 1 | -3.906978000 | -5.652131000 | 0.000126000  | 1 | 6.779462000  | -1.171606000 | -0.000542000 |
| 1 | -6.565862000 | 2.024503000  | -0.000314000 | 1 | 0.929820000  | -6.798896000 | 0.000142000  |
| 1 | -6.750448000 | 3.890223000  | -0.000188000 | 1 | -0.682511000 | -7.755813000 | 0.000091000  |
| 1 | -4.814294000 | 6.125638000  | 0.000164000  | 1 | -3.527091000 | -6.946553000 | -0.000108000 |
| 1 | -2.941351000 | 6.209624000  | 0.000167000  | 1 | -4.395744000 | -5.285093000 | -0.000217000 |
| 1 | 6.744095000  | 3.900872000  | 0.000013000  | 1 | -6.426100000 | 3.550170000  | -0.938941000 |
| 1 | 5.036093000  | 4.674030000  | 0.000125000  | 1 | -6.426337000 | 3.551181000  | 0.937920000  |

|                        |              |              |              |                        |              |              |              |
|------------------------|--------------|--------------|--------------|------------------------|--------------|--------------|--------------|
| 1                      | 6.848507000  | -0.557411000 | -0.000043000 | 1                      | -2.461343000 | 6.490385000  | 0.000249000  |
| 1                      | 7.712246000  | 1.106590000  | 0.000099000  | 1                      | -4.338924000 | 6.472437000  | -0.000145000 |
| <b>3m</b>              |              |              |              | <b>3m</b>              |              |              |              |
| <b>m06-2x/def2-SVP</b> |              |              |              | <b>m06-2x/def2-SVP</b> |              |              |              |
| <b>-2 1</b>            |              |              |              | <b>-2 3</b>            |              |              |              |
| 6                      | -3.296900000 | -2.712258000 | -0.000160000 | 6                      | -4.212348000 | 0.506416000  | -0.000069000 |
| 6                      | -3.958312000 | -1.452934000 | -0.000205000 | 6                      | -3.803732000 | 1.879176000  | -0.000056000 |
| 6                      | -5.276265000 | -2.147889000 | -0.000209000 | 6                      | -5.204154000 | 2.333670000  | 0.000009000  |
| 6                      | -4.550616000 | -3.462131000 | -0.000103000 | 6                      | -5.633352000 | 0.891731000  | 0.000117000  |
| 6                      | -4.957260000 | -4.744825000 | -0.000074000 | 6                      | -6.820667000 | 0.268604000  | 0.000288000  |
| 6                      | -6.553147000 | -1.758145000 | -0.000185000 | 6                      | -5.857519000 | 3.504627000  | 0.000025000  |
| 6                      | -3.544691000 | -0.153105000 | -0.000174000 | 6                      | -2.556947000 | 2.477047000  | -0.000067000 |
| 6                      | -3.021161000 | 0.988132000  | -0.000056000 | 6                      | -1.382128000 | 2.874824000  | -0.000116000 |
| 6                      | -2.368575000 | 2.142521000  | -0.000028000 | 6                      | -0.065508000 | 3.189102000  | -0.000109000 |
| 6                      | -1.638836000 | 3.172796000  | -0.000046000 | 6                      | 1.162309000  | 3.364877000  | -0.000072000 |
| 6                      | -0.727491000 | 4.163667000  | 0.000028000  | 6                      | 2.544711000  | 3.394667000  | 0.000006000  |
| 6                      | 0.762564000  | 4.157567000  | -0.000102000 | 6                      | 3.529350000  | 2.354475000  | 0.000110000  |
| 6                      | 0.777011000  | 5.631760000  | 0.000129000  | 6                      | 4.623071000  | 3.340109000  | 0.000124000  |
| 6                      | -0.730066000 | 5.637843000  | 0.000152000  | 6                      | 3.588842000  | 4.432697000  | -0.000070000 |
| 6                      | -1.646221000 | 6.617683000  | 0.000139000  | 6                      | 3.642893000  | 5.772518000  | -0.000264000 |
| 6                      | 1.701190000  | 6.603991000  | 0.000392000  | 6                      | 5.963839000  | 3.320611000  | 0.000254000  |
| 6                      | 1.665859000  | 3.159450000  | -0.000209000 | 6                      | 3.423820000  | 0.975780000  | 0.000136000  |
| 6                      | 2.386794000  | 2.122909000  | -0.000351000 | 6                      | 3.180960000  | -0.240543000 | 0.000117000  |
| 6                      | 3.029236000  | 0.962947000  | -0.000390000 | 6                      | 2.794864000  | -1.537925000 | 0.000035000  |
| 6                      | 3.543165000  | -0.182736000 | -0.000141000 | 6                      | 2.333158000  | -2.689118000 | -0.000014000 |
| 6                      | 3.945898000  | -1.485861000 | 0.000023000  | 6                      | 1.667613000  | -3.901134000 | 0.000005000  |
| 6                      | 3.274042000  | -2.739808000 | 0.000390000  | 6                      | 0.274447000  | -4.233612000 | -0.000039000 |
| 6                      | 4.521491000  | -3.499997000 | 0.000136000  | 6                      | 0.581020000  | -5.673659000 | -0.000007000 |
| 6                      | 5.258016000  | -2.191821000 | -0.000220000 | 6                      | 2.044385000  | -5.324423000 | -0.000009000 |
| 6                      | 6.538090000  | -1.812696000 | -0.000638000 | 6                      | 3.177635000  | -6.041205000 | -0.000010000 |
| 6                      | 4.917458000  | -4.786048000 | 0.000207000  | 6                      | -0.106391000 | -6.824949000 | 0.000002000  |
| 6                      | 1.897159000  | -3.026758000 | 0.000545000  | 6                      | -0.866713000 | -3.452793000 | -0.000125000 |
| 6                      | 0.674853000  | -3.132393000 | 0.000622000  | 6                      | -1.798638000 | -2.634292000 | -0.000137000 |
| 6                      | -0.701021000 | -3.126456000 | 0.000401000  | 6                      | -2.729302000 | -1.651370000 | -0.000103000 |
| 6                      | -1.922387000 | -3.010628000 | 0.000165000  | 6                      | -3.495464000 | -0.675964000 | -0.000088000 |

|   |              |              |              |   |              |              |              |
|---|--------------|--------------|--------------|---|--------------|--------------|--------------|
| 1 | -1.339729000 | 7.666259000  | 0.000163000  | 1 | 4.604353000  | 6.290388000  | -0.000195000 |
| 1 | -2.713339000 | 6.387635000  | 0.000110000  | 1 | 2.729063000  | 6.369295000  | -0.000429000 |
| 1 | 1.403429000  | 7.655080000  | 0.000563000  | 1 | 6.533649000  | 4.252229000  | 0.000166000  |
| 1 | 2.766355000  | 6.365062000  | 0.000248000  | 1 | 6.509600000  | 2.375430000  | 0.000345000  |
| 1 | 6.802157000  | -0.753321000 | -0.000857000 | 1 | 4.151445000  | -5.548309000 | -0.000068000 |
| 1 | 7.341265000  | -2.553027000 | -0.000799000 | 1 | 3.145276000  | -7.132782000 | -0.000009000 |
| 1 | 5.979612000  | -5.038006000 | -0.000134000 | 1 | 0.415552000  | -7.784215000 | 0.000045000  |
| 1 | 4.189477000  | -5.598599000 | 0.000533000  | 1 | -1.197829000 | -6.825045000 | -0.000082000 |
| 1 | -6.021501000 | -4.987822000 | 0.000099000  | 1 | -7.749884000 | 0.842326000  | 0.000504000  |
| 1 | -4.236129000 | -5.563470000 | 0.000097000  | 1 | -6.880532000 | -0.821185000 | 0.000310000  |
| 1 | -6.808460000 | -0.696627000 | -0.000141000 | 1 | -5.311812000 | 4.449857000  | 0.000082000  |
| 1 | -7.362406000 | -2.491820000 | -0.000123000 | 1 | -6.949221000 | 3.532345000  | 0.000093000  |

|                          |              |              |              |                          |              |              |              |
|--------------------------|--------------|--------------|--------------|--------------------------|--------------|--------------|--------------|
| <b>3m</b>                |              |              |              | <b>3m</b>                |              |              |              |
| <b>m06-2x/def2-tzvpp</b> |              |              |              | <b>m06-2x/def2-tzvpp</b> |              |              |              |
| <b>0 1</b>               |              |              |              | <b>-2 3</b>              |              |              |              |
| 6                        | -1.838214000 | 3.789895000  | -0.000173000 | 6                        | 4.169755000  | 0.600101000  | -0.000275000 |
| 6                        | -0.516564000 | 4.180314000  | 0.000010000  | 6                        | 4.131083000  | -0.825501000 | 0.000085000  |
| 6                        | -0.877058000 | 5.616818000  | 0.000130000  | 6                        | 5.595111000  | -0.902122000 | 0.000067000  |
| 6                        | -2.316211000 | 5.191637000  | -0.000215000 | 6                        | 5.635756000  | 0.597279000  | -0.000050000 |
| 6                        | -3.494353000 | 5.792776000  | -0.000331000 | 6                        | 6.617685000  | 1.500454000  | -0.000018000 |
| 6                        | -0.214713000 | 6.761640000  | 0.000454000  | 6                        | 6.526573000  | -1.857229000 | 0.000244000  |
| 6                        | 0.657331000  | 3.430405000  | 0.000187000  | 6                        | 3.090411000  | -1.723734000 | 0.000241000  |
| 6                        | 1.606442000  | 2.675442000  | 0.000322000  | 6                        | 2.069716000  | -2.409128000 | 0.000361000  |
| 6                        | 2.590115000  | 1.740383000  | 0.000297000  | 6                        | 0.887365000  | -3.049253000 | 0.000186000  |
| 6                        | 3.392465000  | 0.830983000  | 0.000251000  | 6                        | -0.244401000 | -3.529547000 | -0.000041000 |
| 6                        | 4.201321000  | -0.303112000 | 0.000190000  | 6                        | -1.565175000 | -3.910855000 | -0.000032000 |
| 6                        | 3.878729000  | -1.642923000 | 0.000128000  | 6                        | -2.780549000 | -3.164722000 | 0.000120000  |
| 6                        | 5.303012000  | -2.048886000 | -0.000035000 | 6                        | -3.578750000 | -4.394380000 | -0.000170000 |
| 6                        | 5.654300000  | -0.589932000 | -0.000140000 | 6                        | -2.300479000 | -5.179127000 | -0.000122000 |
| 6                        | 6.764004000  | 0.129700000  | -0.000603000 | 6                        | -2.009084000 | -6.481029000 | -0.000234000 |
| 6                        | 5.963560000  | -3.194751000 | 0.000055000  | 6                        | -4.871570000 | -4.723715000 | -0.000298000 |
| 6                        | 2.642323000  | -2.284569000 | 0.000075000  | 6                        | -3.038291000 | -1.814389000 | 0.000336000  |
| 6                        | 1.513744000  | -2.728485000 | -0.000022000 | 6                        | -3.121792000 | -0.587764000 | 0.000450000  |
| 6                        | 0.212140000  | -3.112849000 | -0.000126000 | 6                        | -3.084916000 | 0.756236000  | 0.000301000  |
| 6                        | -0.976585000 | -3.353003000 | -0.000187000 | 6                        | -2.935010000 | 1.976528000  | 0.000192000  |

|   |              |              |              |   |              |              |              |
|---|--------------|--------------|--------------|---|--------------|--------------|--------------|
| 6 | -2.363154000 | -3.486601000 | -0.000088000 | 6 | -2.604601000 | 3.310937000  | 0.000125000  |
| 6 | -3.362310000 | -2.537491000 | -0.000176000 | 6 | -1.350627000 | 3.990161000  | -0.000028000 |
| 6 | -4.425864000 | -3.568168000 | 0.000091000  | 6 | -2.016161000 | 5.296392000  | 0.000111000  |
| 6 | -3.337853000 | -4.601677000 | 0.000030000  | 6 | -3.335065000 | 4.582030000  | -0.000099000 |
| 6 | -3.269121000 | -5.922498000 | 0.000361000  | 6 | -4.608205000 | 4.980746000  | -0.000198000 |
| 6 | -5.748476000 | -3.567632000 | 0.000046000  | 6 | -1.654654000 | 6.580579000  | 0.000149000  |
| 6 | -3.300010000 | -1.145887000 | -0.000217000 | 6 | -0.052428000 | 3.537919000  | -0.000089000 |
| 6 | -3.120588000 | 0.053518000  | -0.000172000 | 6 | 1.051492000  | 2.996679000  | -0.000195000 |
| 6 | -2.802658000 | 1.372939000  | -0.000122000 | 6 | 2.197249000  | 2.293150000  | -0.000422000 |
| 6 | -2.416139000 | 2.522445000  | -0.000128000 | 6 | 3.179277000  | 1.553425000  | -0.000459000 |
| 1 | 7.734146000  | -0.347706000 | -0.000884000 | 1 | -2.798116000 | -7.222038000 | -0.000259000 |
| 1 | 6.726868000  | 1.210315000  | -0.000577000 | 1 | -0.983105000 | -6.823847000 | -0.000292000 |
| 1 | 7.044679000  | -3.211306000 | 0.000040000  | 1 | -5.175315000 | -5.762660000 | -0.000410000 |
| 1 | 5.438659000  | -4.140048000 | 0.000357000  | 1 | -5.641565000 | -3.963934000 | -0.000286000 |
| 1 | -2.314519000 | -6.430277000 | 0.000351000  | 1 | -5.418124000 | 4.263642000  | -0.000235000 |
| 1 | -4.167361000 | -6.524391000 | 0.000641000  | 1 | -4.855443000 | 6.034547000  | -0.000280000 |
| 1 | -6.303139000 | -4.495770000 | 0.000214000  | 1 | -2.402290000 | 7.363331000  | 0.000320000  |
| 1 | -6.304980000 | -2.640585000 | -0.000079000 | 1 | -0.611590000 | 6.867234000  | 0.000081000  |
| 1 | -3.566436000 | 6.871599000  | -0.000147000 | 1 | 7.653922000  | 1.187604000  | -0.000060000 |
| 1 | -4.411396000 | 5.219916000  | -0.000465000 | 1 | 6.401689000  | 2.560396000  | -0.000467000 |
| 1 | 0.866392000  | 6.779294000  | 0.000694000  | 1 | 6.253401000  | -2.903932000 | 0.000210000  |
| 1 | -0.740607000 | 7.706378000  | 0.000516000  | 1 | 7.578236000  | -1.601058000 | 0.000256000  |

### 3m (dianion)

#### CASSCF(12,12)/ma-def2-TZVPP

|   |              |              |              |
|---|--------------|--------------|--------------|
| 6 | 4.165653000  | 0.600275000  | 0.000726000  |
| 6 | 4.127127000  | -0.825697000 | -0.000244000 |
| 6 | 5.584059000  | -0.907185000 | -0.000193000 |
| 6 | 5.624870000  | 0.602946000  | 0.000163000  |
| 6 | 6.609068000  | 1.492054000  | 0.000377000  |
| 6 | 6.518807000  | -1.848152000 | -0.000848000 |
| 6 | 3.078003000  | -1.729336000 | -0.000283000 |
| 6 | 2.081726000  | -2.407077000 | -0.000199000 |
| 6 | 0.876123000  | -3.048847000 | -0.000306000 |
| 6 | -0.231562000 | -3.508015000 | -0.000425000 |
| 6 | -1.579388000 | -3.891387000 | -0.000311000 |

|   |              |              |              |
|---|--------------|--------------|--------------|
| 6 | -2.767281000 | -3.140931000 | -0.000424000 |
| 6 | -3.581332000 | -4.376553000 | -0.000077000 |
| 6 | -2.298941000 | -5.161174000 | 0.000010000  |
| 6 | -2.002010000 | -6.452466000 | 0.000405000  |
| 6 | -4.863869000 | -4.683610000 | 0.000125000  |
| 6 | -3.040844000 | -1.797475000 | -0.000405000 |
| 6 | -3.121910000 | -0.571547000 | -0.000382000 |
| 6 | -3.086306000 | 0.740135000  | -0.000514000 |
| 6 | -2.939587000 | 1.959922000  | -0.000531000 |
| 6 | -2.593244000 | 3.286470000  | -0.000382000 |
| 6 | -1.366282000 | 3.971165000  | 0.000612000  |
| 6 | -2.015666000 | 5.278231000  | -0.000092000 |
| 6 | -3.338855000 | 4.564567000  | -0.000037000 |
| 6 | -4.602793000 | 4.940976000  | -0.000415000 |
| 6 | -1.648922000 | 6.551462000  | -0.000075000 |
| 6 | -0.041304000 | 3.515091000  | 0.000900000  |
| 6 | 1.039645000  | 2.996087000  | 0.001009000  |
| 6 | 2.208677000  | 2.289826000  | 0.000902000  |
| 6 | 3.166890000  | 1.559255000  | 0.000813000  |
| 1 | -2.776438000 | -7.196831000 | 0.000701000  |
| 1 | -0.981842000 | -6.787313000 | 0.000506000  |
| 1 | -5.187775000 | -5.708090000 | 0.000415000  |
| 1 | -5.617093000 | -3.918073000 | 0.000001000  |
| 1 | -5.396591000 | 4.217602000  | -0.000872000 |
| 1 | -4.870393000 | 5.981597000  | -0.000574000 |
| 1 | -2.381718000 | 7.336847000  | -0.000281000 |
| 1 | -0.612051000 | 6.830329000  | 0.000379000  |
| 1 | 7.636241000  | 1.177050000  | 0.000072000  |
| 1 | 6.406985000  | 2.547130000  | 0.001055000  |
| 1 | 6.260045000  | -2.890777000 | -0.001514000 |
| 1 | 7.561492000  | -1.589076000 | -0.000969000 |

---

<sup>1</sup> (a) Lu, T. A comprehensive electron wavefunction analysis toolbox for chemists, Multiwfn. *J. Chem. Phys.* **161**, 082503 (2024). DOI: 10.1063/5.0216272. (b) Lu, T. & Chen, F. Multiwfn: a multifunctional wavefunction analyzer. *J. Comput. Chem.* **33**, 580–592 (2012). DOI: 10.1002/jcc.22885.

<sup>2</sup> Bultinck, P.; *et al.* Multicenter bond indices as a new measure of aromaticity in polycyclic aromatic hydrocarbons. *J. Phys. Org. Chem.* **18**, 706–718 (2005). DOI: 10.1002/poc.922.

<sup>3</sup> AIMAll. 19.10.12 Gristmill Software, Overland Park KS, USA, 2019 (aim.tkgristmill.com)

<sup>4</sup> Bader, R. F. W. *Atoms in Molecules: A Quantum Theory*. Clarendon Press, Oxford (1990).
